# Supplementary material
Source: PubMed Central journal article supplement (PMC5669036)

Supporting Information – Table of Contents

|                                                                                 |             |
|---------------------------------------------------------------------------------|-------------|
| <b>Materials and Methods .....</b>                                              | <b>S2</b>   |
| <b>Experimental Procedures .....</b>                                            | <b>S3</b>   |
| <b>A. Syntheses of Heck Cyclization Substrates.....</b>                         | <b>S3</b>   |
| <b>A.1. Scalable Synthesis of Imide Substrate 5 for Reaction Discovery.....</b> | <b>S3</b>   |
| <b>A.2. Syntheses of Halo-Imide Reductive Coupling Partners .....</b>           | <b>S5</b>   |
| <b>A.3. Syntheses of Carbonate Reductive Coupling Partners .....</b>            | <b>S9</b>   |
| <b>A.4. Reductive Cross Coupling of Imides and Carbonates .....</b>             | <b>S18</b>  |
| <b>B. Initial Evaluation of Ligand Effects and Reaction Conditions .....</b>    | <b>S27</b>  |
| <b>C. Scope of Methodology .....</b>                                            | <b>S28</b>  |
| <b>D. Diastereoselective Heck Cyclization .....</b>                             | <b>S36</b>  |
| <b>References.....</b>                                                          | <b>S39</b>  |
| <b><sup>1</sup>H NMR Spectra .....</b>                                          | <b>S40</b>  |
| <b><sup>13</sup>C NMR Spectra... ..</b>                                         | <b>S90</b>  |
| <b><sup>19</sup>F NMR Spectra... ..</b>                                         | <b>S140</b> |

**Materials and Methods.** Unless stated otherwise, reactions were conducted in flame-dried glassware under an atmosphere of nitrogen and commercially obtained reagents were used as received. Non-commercially available substrates were synthesized following protocols specified in Section A in the Experimental Procedures. Prior to use, toluene was purified by distillation and taken through three freeze-pump-thaw cycles. 2-Halobenzoic acids derivatives **SI-6**, **SI-8**, **SI-10** were obtained from Combi-Blocks; **SI-4** and **SI-1** were obtained from Oakwood; **SI-12** was obtained from AstaTech; and **SI-16** was obtained from Ark Pharm. Ni(cod)<sub>2</sub> and Benz-ICy•HCl (**9**) were obtained from Strem Chemicals. Reductive coupling ligands **SI-35**<sup>1</sup> and **SI-41**<sup>2</sup> were prepared from known literature procedures. Reaction temperatures were controlled using an IKAmag temperature modulator, and unless stated otherwise, reactions were performed at room temperature (approximately 23 °C). Thin-layer chromatography (TLC) was conducted with EMD gel 60 F254 pre-coated plates (0.25 mm for analytical chromatography and 0.50 mm for preparative chromatography) and visualized using a combination of UV, anisaldehyde, iodine, and potassium permanganate staining techniques. Silicycle Siliaflash P60 (particle size 0.040–0.063 mm) was used for flash column chromatography. <sup>1</sup>H NMR spectra were recorded on Bruker spectrometers (at 400 and 500 MHz) and are referenced to the residual solvent peak 7.26 ppm for CDCl<sub>3</sub>. Data for <sup>1</sup>H NMR spectra are reported as follows: chemical shift (δ ppm), multiplicity, coupling constant (Hz), integration. <sup>13</sup>C NMR spectra were recorded on Bruker spectrometers (at 125 MHz) and are referenced to the residual solvent peak 77.16 ppm for CDCl<sub>3</sub>. Data for <sup>13</sup>C NMR are reported as follows: chemical shift (δ ppm), multiplicity, and coupling constant (Hz). <sup>19</sup>F NMR spectra were recorded on Bruker spectrometers (at 376 MHz) and are reported in terms of chemical shift in CDCl<sub>3</sub>. IR spectra were recorded on a Perkin-Elmer 100 spectrometer and are reported in terms of frequency absorption (cm<sup>-1</sup>). High-resolution mass spectra were obtained from the UC Irvine and UCLA Mass Spectrometry Facilities using TOF and Orbitrap mass analyzers, respectively.

## A. Syntheses of Heck Cyclization Substrates

### A.1. Scalable Synthesis of Imide **5** for Reaction Discovery.

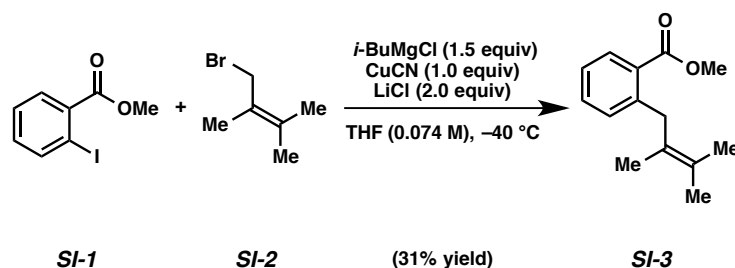

**Ester SI-3.** Following a modification of the general procedure reported by Querolle and co-workers,<sup>3</sup> a flask containing a stir bar was charged with CuCN (1.03 g, 11.5 mmol, 1.0 equiv) and LiCl (971 mg, 22.9 mmol, 2.0 equiv) in the glovebox. The flask was removed from the glovebox, and the solids were suspended in THF (39 mL). The resulting mixture was stirred vigorously until a completely dissolved solution of CuCN•2LiCl was formed. In a separate flask containing a solution of methyl-2-iodobenzoate (**SI-1**) (3.02 g, 11.45 mmol, 1.0 equiv) in THF (115 mL) at  $-40\text{ }^\circ\text{C}$  was added *i*-BuMgCl (8.6 mL of a 2.0 M solution in THF, 17.2 mmol, 1.5 equiv) dropwise over 1 min. After this mixture was stirred at  $-40\text{ }^\circ\text{C}$  for 1 h, the solution of CuCN•2LiCl was added via cannula. The combined mixture stirred at  $-40\text{ }^\circ\text{C}$  for an additional 15 min, at which point bromide **SI-2** (4.65 g, 28.6 mmol, 2.5 equiv) was added dropwise over 1 min. After stirring at  $-40\text{ }^\circ\text{C}$  for an additional hour, the reaction was poured into 9:1 sat. aq.  $\text{NH}_4\text{Cl}:\text{NH}_4\text{OH}$  (150 mL). The layers were separated and the aqueous layer was extracted with EtOAc (3 x 100 mL). The organic layers were combined, dried over  $\text{MgSO}_4$ , and concentrated under reduced pressure. The crude mixture was purified via flash chromatography (4:1 Benzene:Hexanes) to afford ester **SI-3** (767 mg, 31% yield) as a colorless oil. Ester **SI-3**:  $R_f$  0.63 (3:1 Hexanes:EtOAc);  $^1\text{H}$  NMR (500 MHz,  $\text{CDCl}_3$ ):  $\delta$  7.83 (dd,  $J = 7.7, 1.3$ , 1H), 7.40 (td,  $J = 7.5, 1.5$ , 1H), 7.23 (t,  $J = 7.5$ , 1H), 7.20 (d,  $J = 7.7$ , 1H), 3.89 (s, 3H), 3.78 (s, 2H) 1.76 (s, 3H), 1.71 (s, 3H), 1.57 (s, 3H);  $^{13}\text{C}$  NMR (125 MHz,  $\text{CDCl}_3$ ):  $\delta$  168.7, 142.1, 131.9, 130.6, 130.3, 129.2, 127.1, 125.73, 125.66, 52.0, 37.7, 20.73, 20.69, 18.6; IR (film): 2916, 1720, 1433, 1262, 1246, 1121, 1076  $\text{cm}^{-1}$ ; HRMS–APCI ( $m/z$ )  $[\text{M} + \text{H}]^+$  calcd for  $\text{C}_{14}\text{H}_{19}\text{O}_7^+$ , 219.13796; found 219.13784.

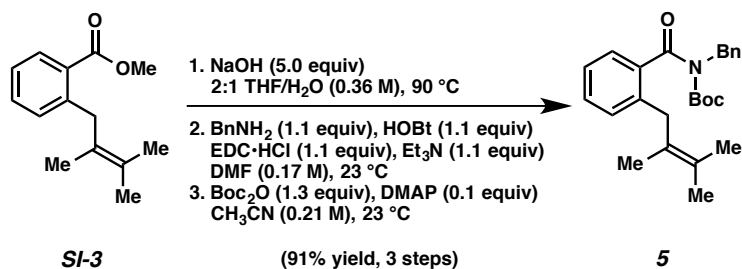

**Imide 5.** To a solution of ester **SI-3** (767 mg, 3.51 mmol, 1.0 equiv) in THF (6.6 mL) was added a solution of NaOH (703 mg, 17.6 mmol, 5.0 equiv) in H<sub>2</sub>O (3.3 mL). The reaction was heated to 90 °C and stirred for 12 h. After cooling to room temperature, the reaction mixture was poured into deionized water (25 mL) and diluted with EtOAc (25 mL). The layers were separated and the aqueous layer was acidified to pH ~4 with 1 N HCl (15 mL) and extracted with EtOAc (3 x 25 mL). The organic layers were combined, washed with deionized water (300 mL), dried over MgSO<sub>4</sub>, and concentrated under reduced pressure to afford the corresponding carboxylic acid, which was used in the subsequent step without further purification.

To a solution of the crude carboxylic acid, HOBt (591 mg, 3.86 mmol, 1.1 equiv from **SI-3**), and EDC·HCl (740 mg, 3.86 mmol, 1.1 equiv from **SI-3**) in DMF (21 mL) was added benzylamine (0.42 mL, 3.86 mmol, 1.1 equiv from **SI-3**) and triethylamine (0.5 mL, 3.86 mmol, 1.1 equiv from **SI-3**). After stirring for 7 h, the reaction mixture was poured into deionized water (100 mL) and diluted with EtOAc (50 mL). The layers were separated and the aqueous layer was extracted with EtOAc (2 x 50 mL). The organic layers were combined, washed with deionized water (100 mL), dried over MgSO<sub>4</sub>, and concentrated under reduced pressure to afford the corresponding amide, which was used in the subsequent step without further purification.

To a solution of the crude amide in CH<sub>3</sub>CN (17 mL) was added DMAP (43 mg, 0.351 mmol, 0.1 equiv from **SI-3**) and Boc<sub>2</sub>O (996 mg, 4.56 mmol, 1.3 equiv from **SI-3**). After stirring for 7 h, the reaction mixture was concentrated under reduced pressure and purified by flash chromatography (99:1 Hexanes:EtOAc) to yield imide **5** (1.26 g, 91% yield, 3 steps) as a white solid. Imide **5**: mp: 65–67 °C; *R<sub>f</sub>* 0.60 (3:1 Hexanes:EtOAc); <sup>1</sup>H NMR (500 MHz, CDCl<sub>3</sub>): δ 7.43 (d, *J* = 7.9, 2H), 7.34 (d, *J* = 7.4, 2H), 7.31–7.25 (m, 2H), 7.16 (t, *J* = 7.4, 1H), 7.11 (d, *J* = 7.9, 2H), 5.03 (s, 2H), 3.43 (s, 2H), 1.75 (s, 3H), 1.70 (s, 3H), 1.58 (s, 3H), 1.11 (s, 9H); <sup>13</sup>C NMR (125 MHz, CDCl<sub>3</sub>): δ 172.6, 153.0, 138.7, 138.0, 137.7, 129.5, 128.6, 128.40, 128.36, 127.5, 127.2, 125.9, 125.44, 125.37, 83.4, 48.0, 36.8, 27.5, 20.76, 20.75, 18.8; IR (film): 2981,



2922, 1728, 1670, 1368, 1333, 1229, 1138  $\text{cm}^{-1}$ ; HRMS–APCI ( $m/z$ )  $[\text{M} + \text{H}]^+$  calcd for  $\text{C}_{25}\text{H}_{32}\text{NO}_3^+$ , 394.23767; found 394.23462.

## A.2. Syntheses of Halo-Imide Reductive Coupling Partners

**Representative Procedure (synthesis of imide SI-5 is used as an example).**

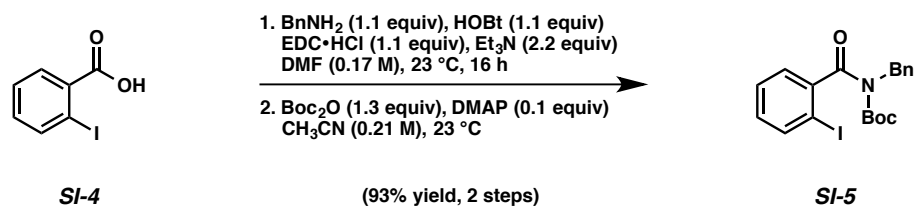

**Iodo-imide SI-5.** To a mixture of 2-iodo-benzoic acid (**SI-4**) (10.0 g, 40.4 mmol, 1.0 equiv), EDC·HCl (8.5 g, 44 mmol, 1.1 equiv), HOBT (6.0 g, 44 mmol, 1.1 equiv) and triethylamine (6.2 mL, 88 mmol, 2.2 equiv) in DMF (238 mL) was added benzylamine (5.0 mL, 44 mmol, 1.1 equiv). The resulting mixture was stirred for 16 h, and then diluted with deionized water (100 mL). The layers were separated and the aqueous layer was extracted with EtOAc (3 x 100 mL). The combined organic layers were washed with 0.1 N HCl (100 mL), sat. aq.  $\text{NaHCO}_3$  (100 mL), and brine (100 mL), dried over  $\text{Na}_2\text{SO}_4$ , and filtered. Concentration under reduced pressure afforded the crude amide, which was used in the subsequent step without further purification.

To the vessel containing the crude amide was added DMAP (0.5 g, 4 mmol, 0.1 equiv from **SI-4**), followed by acetonitrile (192 mL).  $\text{Boc}_2\text{O}$  (11.5 g, 52.5 mmol, 1.3 equiv from **SI-4**) was added in one portion and the reaction vessel was flushed with  $\text{N}_2$ . The reaction mixture was allowed to stir for 16 h. The reaction was concentrated under reduced pressure and the resulting crude residue was purified by flash chromatography (9:1 Hexanes:EtOAc) to yield iodo-imide **SI-5** (16.4 g, 93% yield, 2 steps) as a white solid. Iodo-imide **SI-5**: mp: 100–101 °C;  $R_f$  0.54 (4:1 Hexanes:EtOAc);  $^1\text{H}$  NMR (500 MHz,  $\text{CDCl}_3$ ):  $\delta$  7.79 (d,  $J = 8.0$ , 1H), 7.47 (d,  $J = 8.0$ , 2H), 7.37–7.32 (m, 3H), 7.30–7.27 (m, 1H), 7.18–7.15 (m, 1H), 7.10–7.05 (m, 1H), 5.05 (s, 2H), 1.14 (s, 9H);  $^{13}\text{C}$  NMR (125 MHz,  $\text{CDCl}_3$ ):  $\delta$  171.7, 152.1, 144.6, 139.2, 137.5, 130.3, 128.6, 128.5, 127.9, 127.6, 127.0, 91.7, 83.9, 48.0, 27.6; IR (film): 2979, 1731, 1668, 1228, 741  $\text{cm}^{-1}$ ; HRMS–APCI ( $m/z$ )  $[\text{M} + \text{H}]^+$  calcd for  $\text{C}_{19}\text{H}_{21}\text{INO}_3^+$ , 438.05606; found 438.05536.

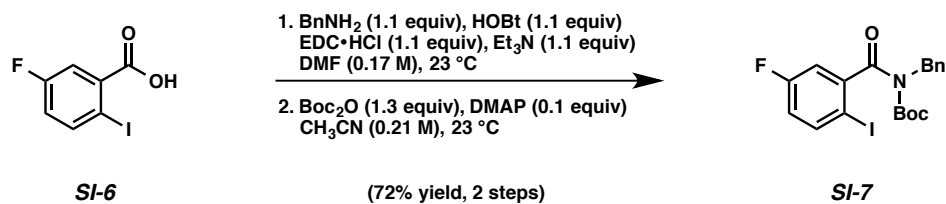

**Iodo-imide SI-7.** Following the representative procedure with 2-iodo-5-fluorobenzoic acid (**SI-6**) (2.0 g, 7.52 mmol), purification by flash chromatography (99:1 Pentane:Et<sub>2</sub>O → 19:1 Pentane:Et<sub>2</sub>O) afforded iodo-imide **SI-7** (2.46 g, 72% yield, 2 steps) as a white solid. Iodo-imide **SI-7**: mp: 61–63 °C; *R<sub>f</sub>* 0.60 (3:1 Hexanes:EtOAc); <sup>1</sup>H NMR (500 MHz, CDCl<sub>3</sub>): δ 7.72 (dd, *J* = 8.7, 5.2, 1H), 7.46 (d, *J* = 7.3, 2H), 7.34 (tt, *J* = 7.1, 1.4, 2H), 7.28 (tt, *J* = 7.3, 1.4, 1H), 6.93 (dd, *J* = 8.5, 3.1, 1H), 6.83 (dt, *J* = 8.5, 3.1, 1H), 5.04 (s, 2H), 1.20 (s, 9H); <sup>13</sup>C NMR (125 MHz, CDCl<sub>3</sub>): δ 170.3 (d, *J* = 2.2), 162.7 (d, *J* = 246), 151.8, 146.2 (d, *J* = 7.2), 140.6 (d, *J* = 7.7), 137.2, 128.63, 128.56, 127.7, 117.7 (d, *J* = 22), 114.7 (d, *J* = 24), 84.6 (d, *J* = 3.6), 84.3, 48.0, 27.6; <sup>19</sup>F NMR (376 MHz, CDCl<sub>3</sub>): δ –113.7, (s, 1F); IR (film): 2981, 1736, 1671, 1369, 1350, 1331, 1232, 1149 cm<sup>-1</sup>; HRMS–APCI (*m/z*) [M + H]<sup>+</sup> calcd for C<sub>19</sub>H<sub>20</sub>FINO<sub>3</sub><sup>+</sup> 456.04664; found 456.04664.

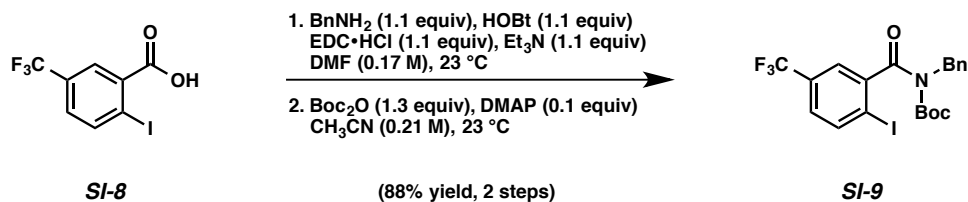

**Iodo-imide SI-9.** Following the representative procedure with 2-iodo-5-(trifluoromethyl)benzoic acid (**SI-8**) (1.98 g, 6.27 mmol), purification by flash chromatography (99:1 Pentane:Et<sub>2</sub>O → 19:1 Pentane:Et<sub>2</sub>O) afforded iodo-imide **SI-9** (2.79 g, 88% yield, 2 steps) as an off-white solid. Iodo-imide **SI-9**: mp: 60–62 °C; *R<sub>f</sub>* 0.70 (3:1 Hexanes:EtOAc); <sup>1</sup>H NMR (500 MHz, CDCl<sub>3</sub>): δ 7.93 (d, *J* = 8.3, 1H), 7.48 (d, *J* = 7.3, 2H), 7.41 (d, *J* = 2.0, 1H), 7.35 (tt, *J* = 7.6, 1.5, 2H), 7.33–7.28 (m, 2H), 5.07 (s, 2H), 1.15 (s, 9H); <sup>13</sup>C NMR (125 MHz, CDCl<sub>3</sub>): δ 170.4, 151.7, 145.5, 139.8, 137.1, 130.8 (q, *J* = 33), 128.7, 128.6, 127.8, 126.5 (q, *J* = 3.6), 123.68 (q, *J* = 273), 123.67 (q, *J* = 3.8), 95.8, 84.4, 48.0, 27.5; <sup>19</sup>F NMR (376 MHz, CDCl<sub>3</sub>): δ –63.0, (s, 3F); IR (film): 2982, 1737, 1669, 1317, 1225, 1126, 1079 cm<sup>-1</sup>; HRMS–APCI (*m/z*) [M + H]<sup>+</sup> calcd for C<sub>20</sub>H<sub>20</sub>F<sub>3</sub>INO<sub>3</sub><sup>+</sup> 506.04345; found 506.04387.

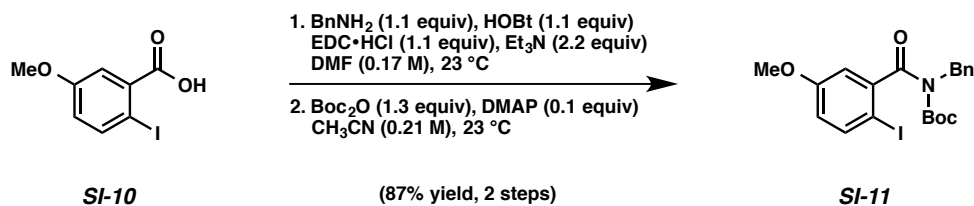

**Iodo-imide SI-11.** Following the representative procedure with 2-iodo-5-methoxybenzoic acid (**SI-10**) (1.0 g, 3.6 mmol), 2-iodo-imide **SI-11** (1.5 g, 87% yield, 2 steps) was obtained as a colorless oil. Iodo-imide **SI-11**:  $R_f$  0.24 (4:1 Hexanes:EtOAc);  $^1\text{H}$  NMR (500 MHz,  $\text{CDCl}_3$ ):  $\delta$  7.62 (d,  $J = 8.8$ , 1H), 7.48–7.45 (m, 2H), 7.36–7.32 (m, 2H), 7.30–7.26 (m, 1H), 6.73 (d,  $J = 3.1$ , 1H), 6.66 (dd,  $J = 8.7$ , 3.1, 1H), 5.04 (s, 2H), 3.76 (s, 3H), 1.17 (s, 9H);  $^{13}\text{C}$  NMR (125 MHz,  $\text{CDCl}_3$ ):  $\delta$  171.3, 159.6, 151.9, 145.1, 139.7, 137.3, 128.5, 128.4, 127.4, 116.8, 112.8, 83.7, 80.0, 55.5, 47.9, 27.4; IR (film): 2979, 1735, 1466, 1144, 848, 699  $\text{cm}^{-1}$ ; HRMS–APCI ( $m/z$ )  $[\text{M} + \text{H}]^+$  calcd for  $\text{C}_{20}\text{H}_{23}\text{INO}_4^+$ , 468.06663; found 468.06671.

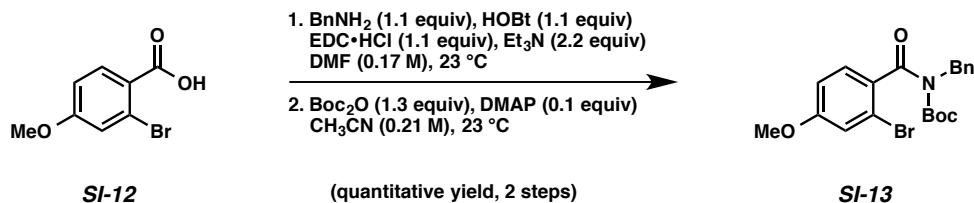

**Bromo-imide SI-13.** Following the representative procedure with 2-bromo-4-methoxybenzoic acid (**SI-12**) (0.46 g, 2.0 mmol), 2-bromo-imide **SI-13** (0.86 g, quantitative yield, 2 steps) was obtained as a yellow oil. Bromo-imide **SI-13**:  $R_f$  0.25 (9:1 Hexanes:EtOAc);  $^1\text{H}$  NMR (500 MHz,  $\text{CDCl}_3$ ):  $\delta$  7.46–7.44 (m, 2H), 7.35–7.31 (m, 2H), 7.32–7.29 (m, 1H), 7.22 (d,  $J = 8.7$ , 1H), 7.07 (d,  $J = 2.5$ , 1H), 6.86 (dd,  $J = 8.7$ , 2.5, 1H), 5.02 (s, 2H), 3.81 (s, 3H), 1.19 (s, 9H);  $^{13}\text{C}$  NMR (125 MHz,  $\text{CDCl}_3$ ):  $\delta$  170.5, 160.8, 152.5, 137.7, 132.7, 129.3, 128.5 (4 carbons), 127.5, 119.8, 118.11, 113.2, 83.5, 55.8, 48.2, 27.6; IR (film): 2979, 1731, 1599, 1227, 848, 558  $\text{cm}^{-1}$ ; HRMS–APCI ( $m/z$ )  $[\text{M} + \text{H}]^+$  calcd for  $\text{C}_{20}\text{H}_{23}\text{BrNO}_4^+$ , 420.08050; found 420.08082.

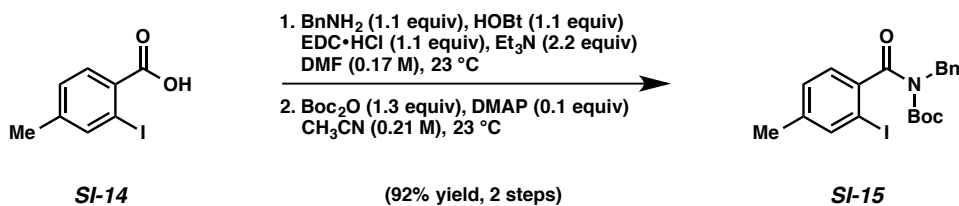

**Iodo-imide SI-15.** Following the representative procedure with 2-iodo-4-methylbenzoic acid (**SI-14**) (2.0 g, 7.6 mmol), iodo-imide **SI-15** (3.3 g, 92% yield, 2 steps) was obtained as a colorless oil. Iodo-imide **SI-15**:  $R_f$  0.34 (9:1 Hexanes:EtOAc);  $^1\text{H}$  NMR (500 MHz,  $\text{CDCl}_3$ ):  $\delta$  7.65 (d,  $J = 7.8$ , 1H), 7.48–7.45 (m, 2H), 7.35–7.31 (m, 2H), 7.29–7.25 (m, 1H), 7.00 (d,  $J = 2.1$ , 1H), 6.89 (ddd,  $J = 8.1, 2.1, 0.8$ , 1H), 5.04 (s, 2H), 2.29 (s, 3H), 1.15 (s, 9H);  $^{13}\text{C}$  NMR (125 MHz,  $\text{CDCl}_3$ ):  $\delta$  171.7, 152.1, 144.2, 138.8, 138.0, 137.4, 131.2, 128.5, 128.4, 127.8, 127.4, 87.4, 83.6, 47.9, 27.4, 20.8; IR (film): 2979, 1731, 1668, 1141, 848, 698  $\text{cm}^{-1}$ ; HRMS–APCI ( $m/z$ )  $[\text{M} + \text{H}]^+$  calcd for  $\text{C}_{20}\text{H}_{23}\text{INO}_3^+$ , 452.07171; found 452.07080.

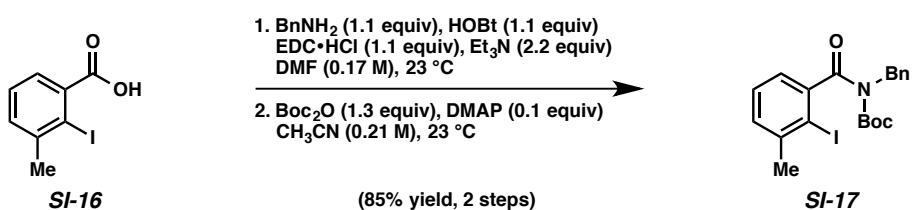

**Iodo-imide SI-17.** Following the representative procedure with 2-iodo-3-methylbenzoic acid (**SI-16**) (3.0 g, 12 mmol), iodo-imide **SI-17** (4.4 g, 85% yield, 2 steps) was obtained as a white solid. Iodo-imide **SI-17**: mp: 87–89 °C;  $R_f$  0.62 (4:1 Hexanes:EtOAc);  $^1\text{H}$  NMR (500 MHz,  $\text{CDCl}_3$ ):  $\delta$  7.48 (d,  $J = 7.8$ , 2H), 7.36–7.32 (m, 2H), 7.29–7.26 (m, 1H), 7.24–7.20 (m, 2H), 6.90 (dd,  $J = 6.7, 2.4$ , 1H), 5.07 (s, 2H), 2.46 (s, 3H), 1.11 (s, 9H);  $^{13}\text{C}$  NMR (125 MHz,  $\text{CDCl}_3$ ):  $\delta$  171.9, 152.0, 145.7, 142.2, 137.4, 129.5, 128.42, 128.36, 127.9, 127.4, 123.7, 98.5, 83.6, 47.7, 28.8, 27.4; IR (film): 2979, 1732, 1338, 1145, 849, 699  $\text{cm}^{-1}$ ; HRMS–APCI ( $m/z$ )  $[\text{M} + \text{H}]^+$  calcd for  $\text{C}_{20}\text{H}_{23}\text{INO}_3^+$ , 452.07171; found 452.07177.

## A.3. Syntheses of Carbonate Reductive Coupling Partners

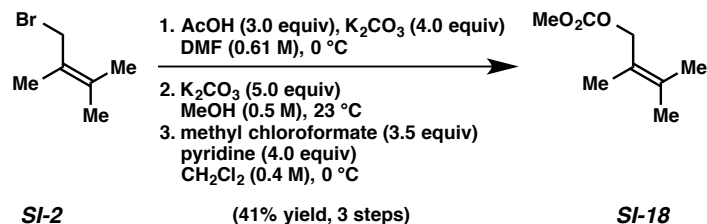

**Carbonate SI-18.** To a suspension of  $\text{K}_2\text{CO}_3$  (39.0 g, 0.282 mol, 4.0 equiv) in DMF (116 mL) was added AcOH (12 mL, 0.212 mol, 3.0 equiv). The mixture was cooled to 0 °C. After stirring for 5 min, bromide **SI-2**<sup>4</sup> (11.5 g, 0.0705 mol, 1.0 equiv) was added. After stirring vigorously at 0 °C for 2 h, the reaction mixture was poured into deionized water (300 mL) and diluted with  $\text{Et}_2\text{O}$  (150 mL). The layers were separated and the aqueous layer was extracted with  $\text{Et}_2\text{O}$  (2 x 150 mL). The organic layers were combined, washed with deionized water (300 mL), dried over  $\text{MgSO}_4$ , and concentrated under reduced pressure (~100 mbar, at room temperature) to afford the corresponding acetate, which was used in the subsequent step without further purification.

To a solution of the crude acetate in MeOH (141 mL) was added  $\text{K}_2\text{CO}_3$  (48.7 g, 0.353 mol, 4.0 equiv from **SI-2**). After stirring vigorously for 12 h, the reaction mixture was poured into deionized water (300 mL) and diluted with  $\text{Et}_2\text{O}$  (150 mL). The layers were separated and the aqueous layer was extracted with  $\text{Et}_2\text{O}$  (2 x 150 mL). The organic layers were combined, washed with deionized water (300 mL), dried over  $\text{MgSO}_4$ , and concentrated under reduced pressure (~100 mbar, at room temperature) to afford the corresponding alcohol, which was used in the subsequent step without further purification.

To a solution of the crude alcohol in  $\text{CH}_2\text{Cl}_2$  (176 mL) was added pyridine (17.0 mL, 0.212 mol, 3.0 equiv from **SI-2**). The reaction was cooled to 0 °C. After stirring for 5 min, methyl chloroformate (11 mL, 0.141 mol, 2.0 equiv from **SI-2**) was added dropwise over 1 min. The reaction was stirred for 6 h, and allowed to warm to room temperature, at which point additional pyridine (8.50 mL, 0.141 mol, 1.0 equiv from **SI-2**) and methyl chloroformate (5.5 mL, 0.106 mol, 1.5 equiv from **SI-2**) was added. After stirring for an additional 12 h, the reaction mixture was poured into brine (200 mL) and diluted with  $\text{Et}_2\text{O}$  (150 mL). The layers were separated and the aqueous layer was extracted with  $\text{Et}_2\text{O}$  (2 x 150 mL). The organic layers were combined, washed with 1 N HCl (300 mL), dried over  $\text{MgSO}_4$ , and concentrated under reduced pressure (~100 mbar, at room temperature). The crude mixture was purified via flash

chromatography (99:1 Pentane:Et<sub>2</sub>O → 15:1 Pentane:Et<sub>2</sub>O) to afford carbonate **SI-18** (4.62 g, 41% yield, 3 steps) as a colorless oil. Carbonate **SI-18**: *R<sub>f</sub>* 0.61 (3:1 Hexanes:EtOAc); <sup>1</sup>H NMR (500 MHz, CDCl<sub>3</sub>): δ 4.63 (s, 2H), 3.74 (s, 3H), 1.75–1.73 (m, 3H), 1.70–1.68 (m, 3H), 1.67 (s, 3H); <sup>13</sup>C NMR (125 MHz, CDCl<sub>3</sub>): δ 156.1, 132.8, 122.4, 69.3, 54.7, 20.9, 20.3, 16.7; IR (film): 2988, 2919, 1744, 1442, 1246 cm<sup>-1</sup>; HRMS–ESI (*m/z*) [M + Na]<sup>+</sup> calcd for C<sub>8</sub>H<sub>14</sub>NaO<sub>3</sub><sup>+</sup>, 181.0841; found 181.0843.

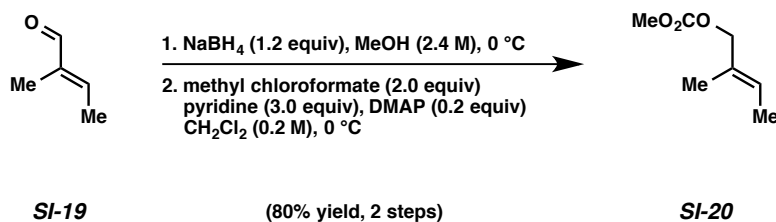

**Carbonate SI-20.** To a solution of tiglic aldehyde (**SI-19**) (3.0 g, 36 mmol, 1.0 equiv) in MeOH (15 mL) at 0 °C was added NaBH<sub>4</sub> (1.6 g, 43 mmol, 1.2 equiv) in 10 portions over 5 min at 0 °C. After 3 h of stirring at room temperature, the mixture was poured into deionized water (50 mL) and diluted with CH<sub>2</sub>Cl<sub>2</sub> (50 mL). The layers were separated and the aqueous layer was extracted with CH<sub>2</sub>Cl<sub>2</sub> (2 x 50 mL). The organic layers were combined, washed with brine (50 mL), dried over MgSO<sub>4</sub>, and concentrated under reduced pressure to afford the corresponding alcohol, which was used in the subsequent step without further purification.

To a solution of the crude alcohol in CH<sub>2</sub>Cl<sub>2</sub> (180 mL) was added pyridine (2.57 mL, 31.9 mmol, 3.0 equiv from **SI-19**) and DMAP (0.86 g, 7.1 mmol, 0.2 equiv). The reaction was cooled to 0 °C. After stirring for 5 min, methyl chloroformate (0.87 mL, 11.3 mmol, 2.0 equiv from **SI-19**) was added dropwise over 20 min. The reaction was allowed to warm to room temperature. After stirring for 1 h, the reaction mixture was poured into brine (50 mL) and diluted with CH<sub>2</sub>Cl<sub>2</sub> (50 mL). The layers were separated and the aqueous layer was extracted with CH<sub>2</sub>Cl<sub>2</sub> (2 x 50 mL). The organic layers were combined, washed with 1 N HCl (50 mL), dried over MgSO<sub>4</sub>, and concentrated under reduced pressure. The crude mixture was purified via flash chromatography (9:1 Pentane:Et<sub>2</sub>O) to afford carbonate **SI-20** (4.6 g, 80% yield, 2 steps) as a colorless oil. Carbonate **SI-20**: *R<sub>f</sub>* 0.61 (4:1 Hexanes:EtOAc); <sup>1</sup>H NMR (500 MHz, CDCl<sub>3</sub>): δ 5.59 (q, *J* = 7.0, 1H), 4.51 (s, 2H), 3.77 (s, 3H), 1.67 (s, 3H), 1.63 (d, *J* = 7.0, 3H); <sup>13</sup>C NMR (125 MHz, CDCl<sub>3</sub>): δ 156.0, 130.4, 125.2, 74.0, 54.8, 13.7, 13.4; IR (film): 2957, 1745, 1442,

1250, 935, 792  $\text{cm}^{-1}$ ; HRMS–ESI ( $m/z$ )  $[\text{M} + \text{Na}]^+$  calcd for  $\text{C}_8\text{H}_{14}\text{O}_3\text{Na}$  181.0843; found 181.0841.

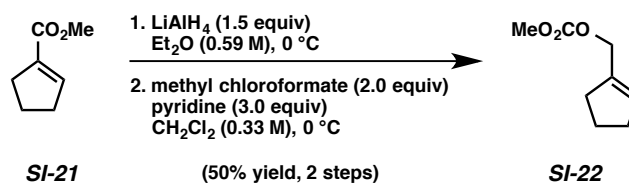

**Carbonate SI-22.** To a solution of methyl ester **SI-21** (1.26 g, 10.0 mmol, 1.0 equiv) in  $\text{Et}_2\text{O}$  (17 mL) at  $0^\circ\text{C}$  was added  $\text{LiAlH}_4$  (570 mg, 15.0 mmol, 1.5 equiv) at  $0^\circ\text{C}$ . After stirring for 4 h, deionized water (3 mL) was added dropwise over 5 min at  $0^\circ\text{C}$ . The resulting heterogeneous mixture was filtered through a plug of celite® (50 mL of  $\text{Et}_2\text{O}$  eluent) and the filtrate was diluted with deionized water (50 mL). The layers were separated and the aqueous layer was extracted with  $\text{Et}_2\text{O}$  (3 x 50 mL). The organic layers were combined, dried over  $\text{MgSO}_4$ , and concentrated under reduced pressure ( $\sim 100$  mbar, at room temperature) to afford the corresponding alcohol, which was used in the subsequent step without further purification.

To a solution of the crude alcohol in  $\text{CH}_2\text{Cl}_2$  (30 mL) was added pyridine (2.50 mL, 30.0 mmol, 3.0 equiv from **SI-21**). The reaction was cooled to  $0^\circ\text{C}$ . After stirring for 5 min, methyl chloroformate (1.55 mL, 20.0 mmol, 2.0 equiv from **SI-21**) was added dropwise over 1 min. The reaction was allowed to warm to room temperature. After stirring for 15 h, the reaction mixture was poured into brine (150 mL) and diluted with  $\text{CH}_2\text{Cl}_2$  (50 mL). The layers were separated and the aqueous layer was extracted with  $\text{CH}_2\text{Cl}_2$  (3 x 50 mL). The organic layers were combined, washed with 1 N HCl (50 mL), dried over  $\text{MgSO}_4$ , and concentrated under reduced pressure ( $\sim 100$  mbar, at room temperature). The crude mixture was purified via flash chromatography (98:2 Hexanes: $\text{Et}_2\text{O}$ ) to afford carbonate **SI-22** (792 mg, 50% yield, 2 steps) as a colorless oil. Carbonate **SI-22**:  $R_f$  0.48 (9:1 Hexanes: $\text{EtOAc}$ );  $^1\text{H}$  NMR (500 MHz,  $\text{CDCl}_3$ ):  $\delta$  5.72 (s, 1H), 4.69 (s, 2H), 3.79 (s, 3H), 2.38–2.31 (m, 4H), 1.92 (quint,  $J = 7.7$ , 2H);  $^{13}\text{C}$  NMR (125 MHz,  $\text{CDCl}_3$ ):  $\delta$  156.0, 138.6, 129.6, 66.9, 54.9, 32.9, 32.6, 23.4; IR (film): 2960, 2918, 2848, 1750, 1447, 1263, 949  $\text{cm}^{-1}$ ; HRMS–ESI ( $m/z$ )  $[\text{M} + \text{Na}]^+$  calcd for  $\text{C}_8\text{H}_{12}\text{O}_3\text{Na}$ , 179.0684; found 179.0677.

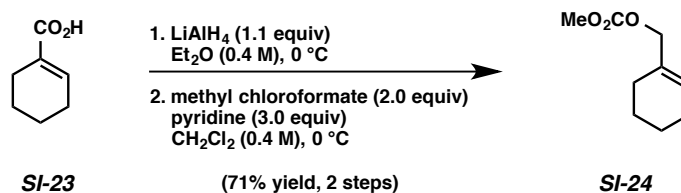

**Carbonate SI-24.** To a solution of carboxylic acid **SI-23** (2.00 g, 16.5 mmol, 1.0 equiv) in Et<sub>2</sub>O (40 mL) at 0 °C was added LiAlH<sub>4</sub> (18.2 mL of a 1.0 M solution in Et<sub>2</sub>O, 18.2 mmol, 1.1 equiv) dropwise over 5 min at 0 °C. After stirring for 15 min, deionized water (5 mL) was added dropwise at 0 °C. The resulting heterogeneous mixture was filtered through a plug of celite® (25 mL of Et<sub>2</sub>O eluent) and the filtrate was diluted with deionized water (50 mL). The layers were separated and the aqueous layer was extracted with Et<sub>2</sub>O (2 x 50 mL). The organic layers were combined, dried over MgSO<sub>4</sub>, and concentrated under reduced pressure (~100 mbar, at room temperature) to afford the corresponding alcohol, which was used in the subsequent step without further purification.

To a solution of the crude alcohol in CH<sub>2</sub>Cl<sub>2</sub> (40 mL) was added pyridine (2.55 mL, 49.5 mmol, 3.0 equiv from **SI-23**). The reaction was cooled to 0 °C. After stirring for 5 min, methyl chloroformate (2.6 mL, 33.0 mmol, 2.0 equiv from **SI-23**) was added dropwise over 1 min. The reaction was allowed to warm to room temperature. After stirring for 4 h, the reaction mixture was poured into brine (50 mL) and diluted with CH<sub>2</sub>Cl<sub>2</sub> (50 mL). The layers were separated and the aqueous layer was extracted with CH<sub>2</sub>Cl<sub>2</sub> (2 x 50 mL). The organic layers were combined, washed with 1 N HCl (50 mL), dried over MgSO<sub>4</sub>, and concentrated under reduced pressure (~100 mbar, at room temperature). The crude mixture was purified via flash chromatography (99:1 Pentane:Et<sub>2</sub>O → 49:1 Pentane:Et<sub>2</sub>O) to afford carbonate **SI-24** (2.00 g, 71% yield, 2 steps) as a colorless oil. Carbonate **SI-24**: R<sub>f</sub> 0.86 (1:1 Hexanes:EtOAc); <sup>1</sup>H NMR (500 MHz, CDCl<sub>3</sub>): δ 5.78 (m, 1H), 4.49 (s, 2H), 3.78 (s, 3H), 2.02 (m, 4H), 1.64 (m, 2H), 1.57 (m, 2H); <sup>13</sup>C NMR (125 MHz, CDCl<sub>3</sub>): δ 156.0, 132.5, 127.5, 72.7, 54.8, 25.9, 25.1, 22.4, 22.2; IR (film): 2930, 1744, 1441, 1250 cm<sup>-1</sup>; HRMS–ESI (*m/z*) [M + Na]<sup>+</sup> calcd for C<sub>9</sub>H<sub>14</sub>NaO<sub>3</sub><sup>+</sup>, 193.0841; found 193.0839.



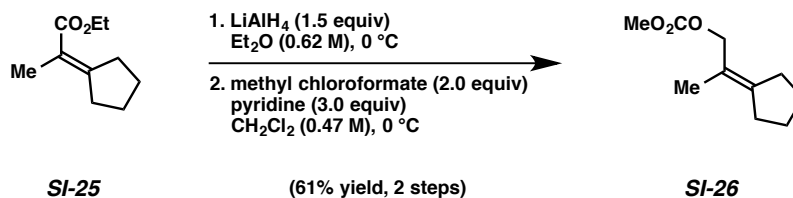

**Carbonate SI-26.** To a solution of known ester **SI-25**<sup>5</sup> (3.15 g, 18.7 mmol, 1.0 equiv) in Et<sub>2</sub>O (30 mL) at 0 °C was added LiAlH<sub>4</sub> (1.07 g, 28.1 mmol, 1.5 equiv) at 0 °C. After stirring for 4 h, deionized water (3 mL) was added dropwise over 5 min at 0 °C. The resulting heterogeneous mixture was filtered through a plug of celite® (25 mL of Et<sub>2</sub>O eluent) and the filtrate was diluted with deionized water (25 mL). The layers were separated and the aqueous layer was extracted with Et<sub>2</sub>O (2 x 50 mL). The organic layers were combined, dried over MgSO<sub>4</sub>, and concentrated under reduced pressure (~100 mbar, at room temperature) to afford the corresponding alcohol, which was used in the subsequent step without further purification.

To a solution of the crude alcohol in CH<sub>2</sub>Cl<sub>2</sub> (40 mL) was added pyridine (4.65 mL, 56.1 mmol, 3.0 equiv from **SI-25**). The reaction was cooled to 0 °C. After stirring for 5 min, methyl chloroformate (2.9 mL, 37.4 mmol, 2.0 equiv from **SI-25**) was added dropwise over 1 min. The reaction was allowed to warm to room temperature. After stirring for 15 h, the reaction mixture was poured into brine (100 mL) and diluted with Et<sub>2</sub>O (50 mL). The layers were separated and the aqueous layer was extracted with Et<sub>2</sub>O (3 x 50 mL). The organic layers were combined, washed with 1 N HCl (25 mL), dried over MgSO<sub>4</sub>, and concentrated under reduced pressure. The crude mixture was purified via flash chromatography (95:5 Hexanes:Et<sub>2</sub>O) to afford carbonate **SI-26** (2.09 g, 61% yield, 2 steps) as a colorless oil. Carbonate **SI-26**: R<sub>f</sub> 0.45 (9:1 Hexanes:EtOAc); <sup>1</sup>H NMR (500 MHz, CDCl<sub>3</sub>): δ 4.63 (s, 2H), 3.78 (s, 3H), 2.33 (s, 2H), 2.22 (s, 2H), 1.70–1.63 (m, 7H); <sup>13</sup>C NMR (125 MHz, CDCl<sub>3</sub>): δ 156.2, 145.0, 119.6, 70.6, 54.8, 31.3, 30.4, 27.0, 26.4, 17.2; IR (film): 2956, 2867, 1748, 1442, 1373, 1256, 942 cm<sup>-1</sup>; HRMS–APCI (*m/z*) [M + H]<sup>+</sup> calcd for C<sub>10</sub>H<sub>17</sub>O<sub>3</sub><sup>+</sup>, 185.11722; found 185.11700.

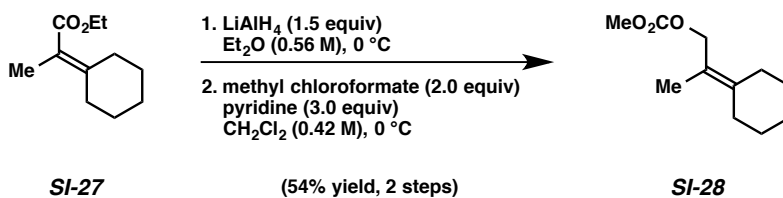

**Carbonate SI-28.** To a solution of known ester **SI-27**<sup>3</sup> (3.08 g, 16.9 mmol, 1.0 equiv) in Et<sub>2</sub>O (30 mL) at 0 °C was added LiAlH<sub>4</sub> (965 mg, 25.4 mmol, 1.5 equiv). After stirring for 1 h, deionized water (3 mL) was added dropwise over 5 min at 0 °C. The resulting heterogeneous mixture was filtered through a plug of celite® (25 mL of Et<sub>2</sub>O eluent) and the filtrate was diluted with deionized water (25 mL). The layers were separated and the aqueous layer was extracted with Et<sub>2</sub>O (2 x 50 mL). The organic layers were combined, dried over MgSO<sub>4</sub>, and concentrated under reduced pressure (~100 mbar, at room temperature) to afford the corresponding alcohol, which was used in the subsequent step without further purification.

To a solution of the crude alcohol in CH<sub>2</sub>Cl<sub>2</sub> (40 mL) was added pyridine (4.21 mL, 50.7 mmol, 3.0 equiv from **SI-27**). The reaction was cooled to 0 °C. After stirring for 5 min, methyl chloroformate (2.6 mL, 33.8 mmol, 2.0 equiv from **SI-27**) was added dropwise over 1 min. The reaction was allowed to warm to room temperature. After stirring for 15 h, the reaction mixture was poured into brine (100 mL) and diluted with Et<sub>2</sub>O (50 mL). The layers were separated and the aqueous layer was extracted with Et<sub>2</sub>O (3 x 50 mL). The organic layers were combined, washed with 1 N HCl (25 mL), dried over MgSO<sub>4</sub>, and concentrated under reduced pressure. The crude mixture was purified via flash chromatography (95:5 Hexanes:Et<sub>2</sub>O) to afford carbonate **SI-28** (1.83 g, 54% yield, 2 steps) as a colorless oil. Carbonate **SI-28**: R<sub>f</sub> 0.45 (9:1 Hexanes:EtOAc); <sup>1</sup>H NMR (500 MHz, CDCl<sub>3</sub>): δ 4.68 (s, 2H), 3.77 (s, 3H), 2.28–2.22 (m, 2H), 2.21–2.15 (m, 2H), 1.73 (s, 3H), 1.60–1.48 (m, 6H); <sup>13</sup>C NMR (125 MHz, CDCl<sub>3</sub>): δ 156.2, 141.4, 119.1, 69.0, 54.8, 31.0, 30.7, 28.4, 27.9, 26.8, 16.5; IR (film): 2925, 2854, 1744, 1443, 1373, 1247, 937 cm<sup>-1</sup>; HRMS–APCI (*m/z*) [M + H]<sup>+</sup> calcd for C<sub>11</sub>H<sub>19</sub>O<sub>3</sub><sup>+</sup>, 199.13287; found 199.13247.

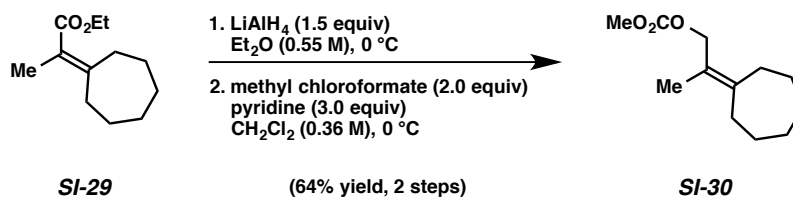

**Carbonate SI-30.** To a solution of known ester **SI-29**<sup>6</sup> (2.15 g, 10.9 mmol, 1.0 equiv) in Et<sub>2</sub>O (20 mL) at 0 °C was added LiAlH<sub>4</sub> (626 mg, 16.4 mmol, 1.5 equiv). After stirring for 1 h, deionized water (3 mL) was added dropwise over 5 min at 0 °C. The resulting heterogeneous mixture was filtered through a plug of celite® (25 mL of Et<sub>2</sub>O eluent) and the filtrate was diluted with deionized water (25 mL). The layers were separated and the aqueous layer was extracted with Et<sub>2</sub>O (2 x 50 mL). The organic layers were combined, dried over MgSO<sub>4</sub>, and concentrated under reduced pressure (~100 mbar, at room temperature) to afford the corresponding alcohol, which was used in the subsequent step without further purification.

To a solution of the crude alcohol in CH<sub>2</sub>Cl<sub>2</sub> (30 mL) was added pyridine (2.80 mL, 32.9 mmol, 3.0 equiv from **SI-29**). The reaction was cooled to 0 °C. After stirring for 5 min, methyl chloroformate (1.7 mL, 21.9 mmol, 2.0 equiv from **SI-29**) was added dropwise over 1 min. The reaction was allowed to warm to room temperature. After stirring for 15 h, the reaction mixture was poured into brine (100 mL) and diluted with Et<sub>2</sub>O (50 mL). The layers were separated and the aqueous layer was extracted with Et<sub>2</sub>O (3 x 50 mL). The organic layers were combined, washed with 1 N HCl (25 mL), dried over MgSO<sub>4</sub>, and concentrated under reduced pressure. The crude mixture was purified via flash chromatography (95:5 Hexanes:Et<sub>2</sub>O) to afford carbonate **SI-30** (1.49 g, 64% yield, 2 steps) as a colorless oil. Carbonate **SI-30**: R<sub>f</sub> 0.52 (9:1 Hexanes:EtOAc); <sup>1</sup>H NMR (500 MHz, CDCl<sub>3</sub>): δ 4.67 (s, 2H), 3.77 (s, 3H), 2.33 (t, *J* = 6.0, 2H), 2.26 (t, *J* = 6.0, 2H), 1.71 (s, 3H), 1.60–1.53 (m, 4H), 1.51–1.44 (m, 4H); <sup>13</sup>C NMR (125 MHz, CDCl<sub>3</sub>): δ 156.1, 142.2, 122.4, 69.1, 54.6, 32.3, 31.2, 28.9, 28.6, 28.2, 26.8, 16.4; IR (film): 2922, 2854, 1748, 1443, 1374, 1256, 936 cm<sup>-1</sup>; HRMS–ESI (*m/z*) [M + Na]<sup>+</sup> calcd for C<sub>12</sub>H<sub>20</sub>O<sub>3</sub>Na<sup>+</sup>, 235.1310; found 235.1301.

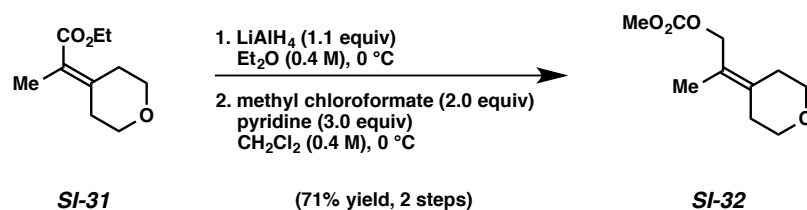

**Carbonate SI-32.** To a solution of ester **SI-31**<sup>7</sup> (1.47 g, 8.0 mmol, 1.0 equiv) in Et<sub>2</sub>O (20 mL) at 0 °C was added LiAlH<sub>4</sub> (8.8 mL of a 1.0 M solution in Et<sub>2</sub>O, 8.8 mmol, 1.1 equiv) dropwise over 5 min. After stirring for 1 h, deionized water (1 mL) was added dropwise over 5 min at 0 °C. The resulting heterogeneous mixture was filtered through a plug of celite® (25 mL of Et<sub>2</sub>O eluent) and the filtrate was diluted with deionized water (25 mL). The layers were separated and the aqueous layer was extracted with Et<sub>2</sub>O (2 x 50 mL). The organic layers were combined, dried over MgSO<sub>4</sub>, and concentrated under reduced pressure (~100 mbar, at room temperature) to afford the corresponding alcohol, which was used in the subsequent step without further purification.

To a solution of the crude alcohol in CH<sub>2</sub>Cl<sub>2</sub> (20 mL) was added pyridine (1.93 mL, 24.0 mmol, 3.0 equiv from **SI-31**). The reaction was cooled to 0 °C. After stirring for 5 min, methyl chloroformate (1.24 mL, 16.0 mmol, 2.0 equiv from **SI-31**) was added dropwise over 1 min. The reaction was allowed to warm to room temperature. After stirring for 12 h, the reaction mixture was poured into brine (25 mL) and diluted with Et<sub>2</sub>O (25 mL). The layers were separated and the aqueous layer was extracted with Et<sub>2</sub>O (2 x 50 mL). The organic layers were combined, washed with 1 N HCl (25 mL), dried over MgSO<sub>4</sub>, and concentrated under reduced pressure. The crude mixture was purified via flash chromatography (9:1 Hexanes:EtOAc → 5:1 Hexanes:EtOAc) to afford carbonate **SI-32** (1.14 g, 71% yield, 2 steps) as a colorless oil. Carbonate **SI-32**: R<sub>f</sub> 0.73 (1:1 Hexanes:EtOAc); <sup>1</sup>H NMR (500 MHz, CDCl<sub>3</sub>): δ 4.66 (s, 2H), 3.78 (s, 3H), 3.67 (app ddd, *J* = 13.2, 7.7, 5.5, 4H), 2.39 (t, *J* = 5.5, 2H), 2.32 (t, *J* = 5.5, 2H) 1.75 (s, 3H); <sup>13</sup>C NMR (125 MHz, CDCl<sub>3</sub>): δ 156.1, 135.6, 121.5, 68.9–68.2 (2 carbons), 54.9, 31.3 & 31.1 (1 carbon), 16.3; IR (film): 2958, 2847, 1743, 1442, 1251 cm<sup>-1</sup>; HRMS–APCI (*m/z*) [M + H]<sup>+</sup> calcd for C<sub>10</sub>H<sub>17</sub>O<sub>7</sub><sup>+</sup>, 201.11214; found 201.11059.

*Note: The data for carbonate SI-32 represents empirically observed chemical shifts from the <sup>13</sup>C NMR spectrum, presumably due to the oxygen-containing heterocycle.*

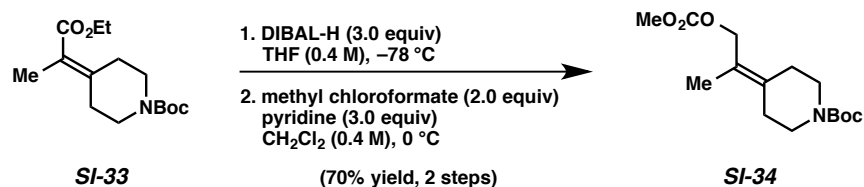

**Carbonate SI-34.** To a solution of ester **SI-33**<sup>8</sup> (1.60 g, 5.65 mmol, 1.0 equiv) in THF (14 mL) at 0 °C was added DIBAL-H (11.3 mL of a 1.0 M solution in THF, 11.3 mmol, 2.0 equiv) dropwise over 5 min. The reaction was stirred for 3 h, and allowed to warm to room temperature, at which point additional DIBAL-H (5.65 mL of a 1.0 M solution in THF, 5.65 mmol, 1.0 equiv) was added. After stirring for an additional hour, the reaction mixture was poured into water (50 mL) and diluted with Et<sub>2</sub>O (50 mL). The resulting heterogeneous mixture was filtered through a plug of celite® (100 mL of Et<sub>2</sub>O eluent). The layers of the resulting filtrate were separated and the aqueous layer was extracted with Et<sub>2</sub>O (1 x 50 mL). The organic layers were combined, dried over MgSO<sub>4</sub>, and concentrated under reduced pressure to afford the corresponding alcohol, which was used in the subsequent step without further purification.

To a solution of the crude alcohol in CH<sub>2</sub>Cl<sub>2</sub> (14 mL) was added pyridine (2.57 mL, 31.9 mmol, 3.0 equiv from **SI-33**). The reaction was cooled to 0 °C. After stirring for 5 min, methyl chloroformate (0.87 mL, 11.3 mmol, 2.0 equiv from **SI-33**) was added dropwise over 1 min. The reaction was allowed to warm to room temperature. After stirring for 1 h, the reaction mixture was poured into brine (50 mL) and diluted with CH<sub>2</sub>Cl<sub>2</sub> (50 mL). The layers were separated and the aqueous layer was extracted with CH<sub>2</sub>Cl<sub>2</sub> (2 x 50 mL). The organic layers were combined, washed with 1 N HCl (50 mL), dried over MgSO<sub>4</sub>, and concentrated under reduced pressure. The crude mixture was purified via flash chromatography (9:1 Hexanes:EtOAc) to afford carbonate **SI-34** (1.18 g, 70% yield, 2 steps) as a colorless oil. Carbonate **SI-34**: R<sub>f</sub> 0.78 (1:1 Hexanes:EtOAc); <sup>1</sup>H NMR (500 MHz, CDCl<sub>3</sub>): δ 4.66 (s, 2H), 3.77 (s, 3H), 3.40 (app q, *J* = 6.8, 4H), 2.35 (t, *J* = 5.6, 2H), 2.28 (t, *J* = 5.6, 2H) 1.75 (s, 3H), 1.45 (s, 9H); <sup>13</sup>C NMR (125 MHz, CDCl<sub>3</sub>): δ 156.0, 154.9, 136.2, 122.3, 79.6, 68.3, 54.9, 29.9, 29.5, 28.6, 16.5; IR (film): 2974, 1745, 1691, 1441, 1420, 1365, 1250, 1228, 1164 cm<sup>-1</sup>; HRMS–APCI (*m/z*) [M + H]<sup>+</sup> calcd for C<sub>15</sub>H<sub>26</sub>NO<sub>5</sub><sup>+</sup>, 300.18055; found 300.17829.

#### A.4. Reductive Cross Coupling of Imides and Carbonates

##### Representative Procedure (synthesis of imide **5** is used as an example).

Reductive couplings were performed using a modification of the procedure reported by Gong and co-workers for the coupling of aryl bromides with substituted allylic acetates.<sup>1</sup>

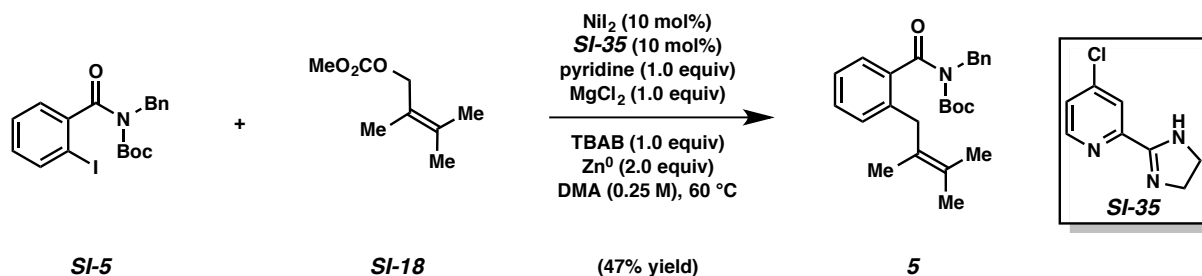

**Imide 5.** A scintillation vial containing imide **SI-5** (219 mg, 0.50 mmol, 1.0 equiv), ligand **SI-35** (9.1 mg, 0.050 mmol, 10 mol%), and a magnetic stir bar was sequentially charged with  $\text{NiI}_2$  (15.6 mg, 0.050 mmol, 10 mol%),  $\text{MgCl}_2$  (47.6 mg, 0.50 mmol, 1.0 equiv), TBAB (161 mg, 0.50 mmol, 1.0 equiv) and  $\text{Zn}^0$  (65.4 mg, 1.0 mmol, 2.0 equiv) in the glovebox. The vial was removed from the glovebox, at which point DMA (2.0 mL), pyridine (40  $\mu\text{L}$ , 0.5 mmol, 1.0 equiv), and carbonate **SI-18** (158 mg, 1.0 mmol, 2.0 equiv) were added. The vial was quickly sealed with a teflon-lined screw cap, and stirred at 60  $^\circ\text{C}$  for 14 h. After cooling to room temperature, the mixture was passed through a column of silica gel and flushed (5:2 Hexanes:EtOAc) until TLC indicated the desired product had eluted. The volatiles were removed under reduced pressure and the crude mixture was further purified by flash chromatography (99:1 Hexanes:EtOAc) to yield imide **5** (92 mg, 47% yield) as a white solid. Spectral data matched what is reported in Section A.1.

*Any modifications of the conditions shown in the representative procedures above are specified in the following schemes.*

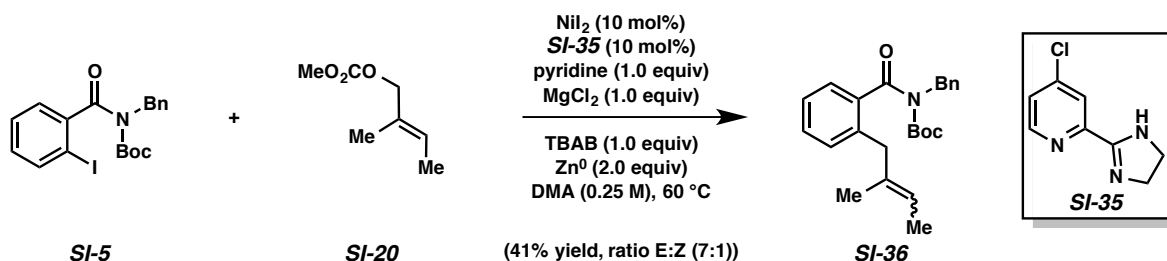

**Imide SI-36.** Following the representative procedure with iodo-imide **SI-5** (218 mg, 0.5 mmol, 1.0 equiv), purification by flash chromatography (9:1 Hexanes:EtOAc) yielded **SI-36** as an inseparable mixture of olefin isomers (79 mg, 41% yield, 7:1 isomer ratio E:Z) and as a colorless oil. Configurational isomers of imide **SI-36** were analyzed as a mixture:  $R_f$  0.62 (4:1 Hexanes:EtOAc); Major (*E*)-isomer **SI-36**  $^1\text{H}$  NMR (500 MHz,  $\text{CDCl}_3$ ):  $\delta$  7.45–7.41 (m, 2H), 7.36–7.32 (m, 2H), 7.31–7.26 (m, 1H), 7.21–7.12 (m, 2H), 5.24 (q,  $J = 6.8$ , 1H), 5.01 (s, 2H), 3.34 (s, 2H), 1.57 (d,  $J = 6.8$ , 3H), 1.53 (s, 3H), 1.10 (s, 9H); Minor (*Z*)-isomer **SI-36**  $^1\text{H}$  NMR (500 MHz,  $\text{CDCl}_3$ ): (20 of 29 signals observed)  $\delta$  5.45 (q,  $J = 6.8$ , 1H), 5.07–5.03 (m, 1H), 4.90–4.85 (m, 1H), 3.41 (s, 2H), 1.63 (d,  $J = 6.8$ , 3H), 1.61 (s, 3H), 1.11 (s, 9H); Major (*E*)-isomer **SI-36**  $^{13}\text{C}$  NMR (125 MHz,  $\text{CDCl}_3$ ):  $\delta$  172.5, 153.0, 138.6, 138.1, 137.5, 134.2, 130.0, 129.4, 127.5, 126.4, 125.8, 121.7, 83.4, 48.1, 42.8, 27.6, 16.0, 13.7; Minor (*Z*)-isomer **SI-36**  $^{13}\text{C}$  NMR (125 MHz,  $\text{CDCl}_3$ ):  $\delta$  172.6, 153.1, 138.7, 138.0, 137.0, 133.8, 129.7, 129.6, 127.6, 126.1, 125.7, 121.9, 83.5, 48.1, 34.2, 27.7, 23.8, 13.8; IR (film): 2979, 1726, 1669, 1228, 1137, 739  $\text{cm}^{-1}$ ; HRMS–APCI ( $m/z$ )  $[\text{M} + \text{H}]^+$  calcd for  $\text{C}_{24}\text{H}_{29}\text{NO}_3$  380.22202; found 380.22186.

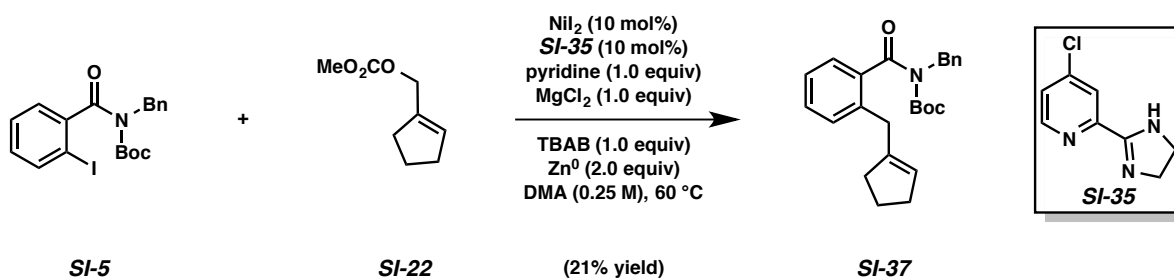

**Imide SI-37.** Following the representative procedure with iodo-imide **SI-5** (874 mg, 2.0 mmol, 1.0 equiv), imide **SI-37** (165 mg, 21% yield) was obtained as a colorless oil. Imide **SI-37**:  $R_f$  0.48 (9:1 Hexanes:EtOAc);  $^1\text{H}$  NMR (500 MHz,  $\text{CDCl}_3$ ):  $\delta$  7.43 (d,  $J = 7.4$ , 2H), 7.35–7.24 (m, 4H), 7.22–7.13 (m, 3H), 5.32 (s, 1H), 5.01 (s, 2H), 3.45 (s, 2H), 2.32–2.24 (m, 2H), 2.20–2.14 (m, 2H), 1.83 (quint,  $J = 7.7$ , 2H), 1.10 (s, 9H);  $^{13}\text{C}$  NMR (125 MHz,  $\text{CDCl}_3$ ):  $\delta$  172.4, 152.9,

142.6, 138.2, 138.0, 137.3, 130.1, 129.4, 128.5, 128.4, 127.5, 126.7, 126.4, 125.7, 83.3, 48.1, 35.1, 34.9, 32.6, 27.5, 23.6; IR (film): 2933, 1728, 1671, 1369, 1334, 1229, 1139  $\text{cm}^{-1}$ ; HRMS–APCI ( $m/z$ ) [ $M + H$ ] $^+$  calcd for  $\text{C}_{25}\text{H}_{30}\text{NO}_3^+$ , 392.22202; found 392.21992.

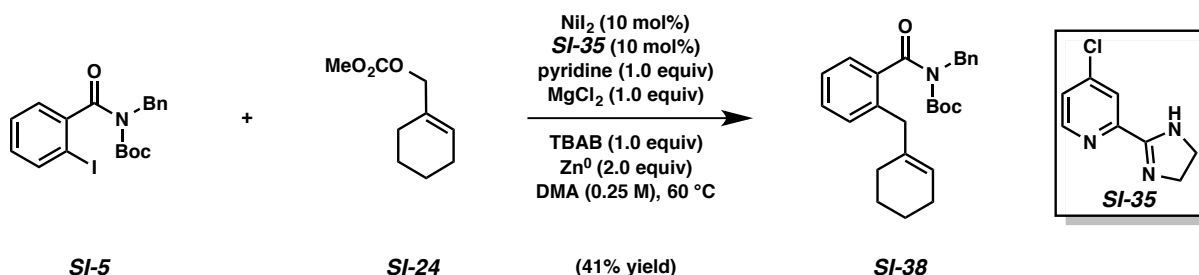

**Imide SI-38.** Following the representative procedure with iodo-imide **SI-5** (1.09 g, 2.5 mmol, 1.0 equiv), imide **SI-38** (417 mg, 41% yield) was obtained as a colorless oil. Imide **SI-38**:  $R_f$  0.66 (3:1 Hexanes:EtOAc);  $^1\text{H}$  NMR (500 MHz,  $\text{CDCl}_3$ ):  $\delta$  7.43 (d,  $J = 7.1$ , 2H), 7.33 (t,  $J = 7.6$ , 2H), 7.31–7.24 (m, 2H), 7.23–7.13 (m, 3H), 5.43 (m, 1H), 5.01 (s, 2H), 3.31 (s, 2H), 1.98 (s, 2H), 1.83 (s, 2H), 1.55 (m, 4H), 1.11 (s, 9H);  $^{13}\text{C}$  NMR (125 MHz,  $\text{CDCl}_3$ ):  $\delta$  172.5, 152.9, 138.4, 138.0, 137.4, 136.2, 129.9, 129.4, 128.6, 128.4, 127.5, 126.4, 125.7, 124.2, 83.3, 48.1, 41.4, 28.3, 27.5, 25.5, 23.0, 22.4; IR (film): 2929, 1728, 1671, 1334, 1230, 1140  $\text{cm}^{-1}$ ; HRMS–APCI ( $m/z$ ) [ $M + H$ ] $^+$  calcd for  $\text{C}_{26}\text{H}_{32}\text{NO}_3^+$ , 406.23767; found 406.23493.

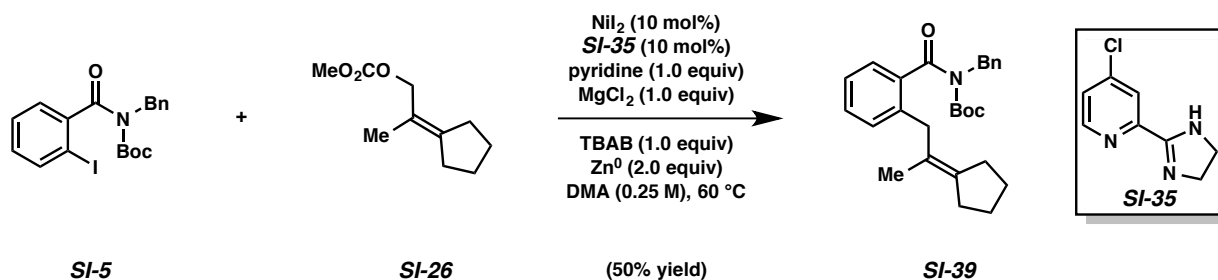

**Imide SI-39.** Following the representative procedure with iodo-imide **SI-5** (874 mg, 2.0 mmol), imide **SI-39** (418 mg, 50% yield) was obtained as a colorless oil. Imide **SI-39**:  $R_f$  0.45 (9:1 Hexanes:EtOAc);  $^1\text{H}$  NMR (500 MHz,  $\text{CDCl}_3$ ):  $\delta$  7.44 (d,  $J = 7.7$ , 2H), 7.33 (t,  $J = 7.2$ , 2H), 7.31–7.25 (m, 2H), 7.18–7.10 (m, 3H), 5.03 (s, 2H), 3.39 (s, 2H), 2.25 (m, 4H), 1.67 (m, 4H), 1.55 (m, 3H), 1.10 (s, 9H);  $^{13}\text{C}$  NMR (125 MHz,  $\text{CDCl}_3$ ):  $\delta$  172.6, 153.0, 139.7, 138.7, 138.0, 137.5, 129.5, 128.59, 128.57, 128.4, 127.5, 126.1, 125.5, 122.9, 83.4, 48.0, 38.1, 31.0, 30.9, 27.5,



27.2, 27.0, 19.3 ; IR (film): 2938, 1729, 1672, 1335, 1229, 1139  $\text{cm}^{-1}$ ; HRMS–APCI ( $m/z$ ) [ $M + H$ ]<sup>+</sup> calcd for  $\text{C}_{27}\text{H}_{34}\text{NO}_3^+$ , 420.25332; found 420.25300.

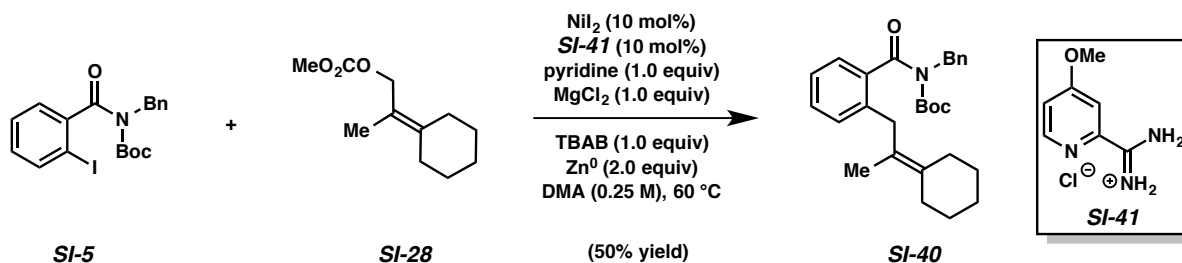

**Imide SI-40.** Following the representative procedure with iodo-imide **SI-5** (0.44 g, 1.0 mmol, 1.0 equiv), imide **SI-40** (0.22 g, 50% yield) was obtained as a colorless oil. Imide **SI-40**:  $R_f$  0.45 (9:1 Hexanes:EtOAc);  $^1\text{H}$  NMR (500 MHz,  $\text{CDCl}_3$ ):  $\delta$  7.45–7.42 (m, 2H), 7.46–7.43 (m, 2H), 7.36–7.32 (m, 2H), 7.18–7.10 (m, 3H), 5.04 (s, 2H), 3.44 (s, 2H), 2.25 (t,  $J = 5.8$ , 2H), 2.17 (t,  $J = 5.8$ , 2H), 1.60 (s, 3H), 1.59–1.54 (m, 4H), 1.52–1.46 (m, 2H), 1.10 (s, 9H);  $^{13}\text{C}$  NMR (125 MHz,  $\text{CDCl}_3$ ):  $\delta$  172.6, 153.0, 138.7, 138.0, 137.8, 135.9, 129.5, 128.6, 128.4, 128.3, 127.5, 125.9, 125.4, 121.8, 83.4, 48.0, 36.2, 30.84, 30.78, 28.5, 28.3, 27.5, 27.1, 18.4; IR (film): 2922, 1728, 1368, 1137, 740, 672  $\text{cm}^{-1}$ ; HRMS–APCI ( $m/z$ ) [ $M + H$ ]<sup>+</sup> calcd for  $\text{C}_{28}\text{H}_{36}\text{NO}_3^+$ , 434.26897; found 434.26866.

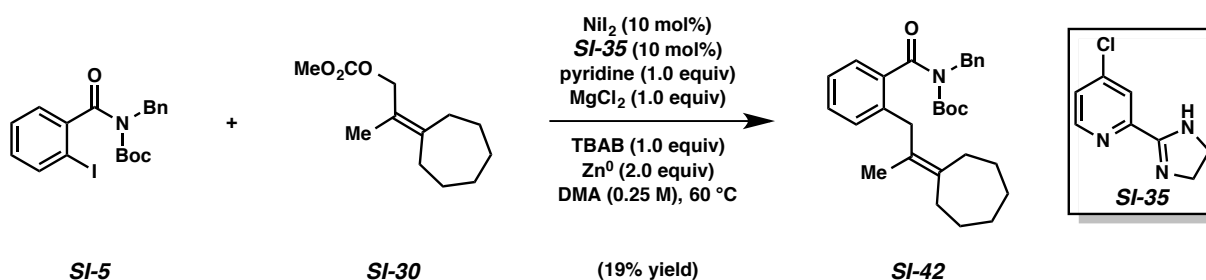

**Imide SI-42.** Following the representative procedure with iodo-imide **SI-5** (874 mg, 2.0 mmol, 1.0 equiv), purification by flash chromatography (199:1 Hexanes:EtOAc) yielded imide **SI-42** (172 mg, 19% yield) was obtained as a colorless oil. Imide **SI-42**:  $R_f$  0.50 (9:1 Hexanes:EtOAc);  $^1\text{H}$  NMR (500 MHz,  $\text{CDCl}_3$ ):  $\delta$  7.44 (d,  $J = 7.8$ , 2H), 7.33 (t,  $J = 7.2$ , 2H), 7.31–7.25 (m, 2H), 7.18–7.10 (m, 3H), 5.04 (s, 2H), 3.42 (s, 2H), 2.31 (t,  $J = 5.9$ , 2H), 2.25 (t,  $J = 5.9$ , 2H), 1.65–1.59 (m, 2H), 1.58 (s, 3H), 1.57–1.47 (m, 6H), 1.11 (s, 9H);  $^{13}\text{C}$  NMR (125 MHz,  $\text{CDCl}_3$ ):  $\delta$  172.6, 153.0, 138.7, 138.0, 137.7, 137.0, 129.5, 128.6, 128.4, 128.2, 127.5, 126.0, 125.4, 125.3,

83.4, 48.0, 36.4, 32.0, 31.8, 29.4, 29.0, 28.1, 27.8, 27.5, 18.6; IR (film): 2921, 1730, 1673, 1335, 1229, 1138  $\text{cm}^{-1}$ ; HRMS–APCI ( $m/z$ )  $[\text{M} + \text{H}]^+$  calcd for  $\text{C}_{29}\text{H}_{38}\text{NO}_3^+$ , 448.28462; found 448.28241.

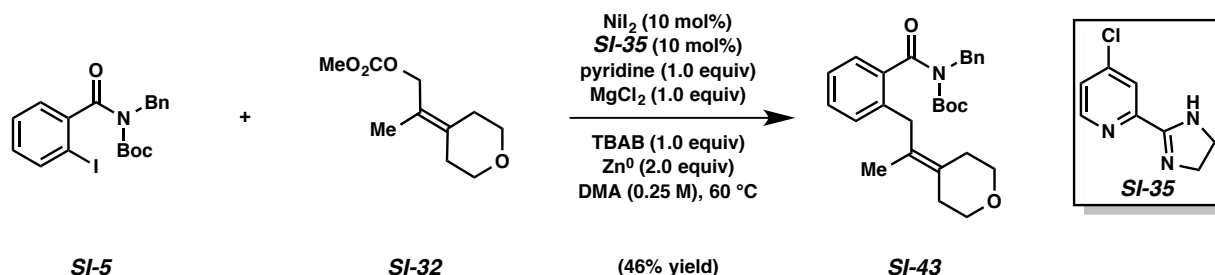

**Imide SI-43.** After following the representative procedure with iodo-imide **SI-5** (1.16 g, 2.66 mmol, 1.0 equiv), the crude reaction mixture was vigorously stirred with 1:1 1 N NaOH/THF (26 mL) solution for 4 h to remove residual carbonate **SI-32**. Purification by flash chromatography (49:1 Hexanes:EtOAc  $\rightarrow$  9:1 Hexanes:EtOAc) afforded imide **SI-43** (536 mg, 46% yield) as a colorless oil. Imide **SI-43**:  $R_f$  0.49 (3:1 Hexanes:EtOAc);  $^1\text{H}$  NMR (500 MHz,  $\text{CDCl}_3$ ):  $\delta$  7.43 (d,  $J = 7.7$ , 2H), 7.34 (t,  $J = 7.7$ , 2H), 7.29 (dt,  $J = 7.7$ , 1.3, 2H), 7.17 (t,  $J = 7.7$ , 1H), 7.13 (t,  $J = 8.0$ , 2H), 5.03 (s, 2H), 3.71 (d,  $J = 5.5$ , 2H), 3.64 (d,  $J = 5.5$ , 2H), 3.45 (s, 2H), 2.38 (d,  $J = 5.5$ , 2H), 2.30 (d,  $J = 5.5$ , 2H), 1.63 (s, 3H), 1.11 (s, 9H);  $^{13}\text{C}$  NMR (125 MHz,  $\text{CDCl}_3$ ):  $\delta$  172.5, 153.0, 138.6, 137.9, 137.3, 130.3, 129.6, 128.6, 128.4, 128.2, 127.6, 126.0, 125.6, 124.5, 83.5, 69.2 & 69.1 (1 carbon), 48.1, 35.9, 31.3 & 31.2 (1 carbon), 27.6, 18.3; IR (film): 2962, 2845, 1728, 1669, 1369, 1333, 1228, 1137, 1101  $\text{cm}^{-1}$ ; HRMS–APCI ( $m/z$ )  $[\text{M} + \text{H}]^+$  calcd for  $\text{C}_{27}\text{H}_{34}\text{NO}_4^+$ , 436.24824; found 436.24824.

*Note: The data for imide SI-43 represents empirically observed chemical shifts from the  $^{13}\text{C}$  NMR spectrum, presumably due to the oxygen-containing heterocycle.*

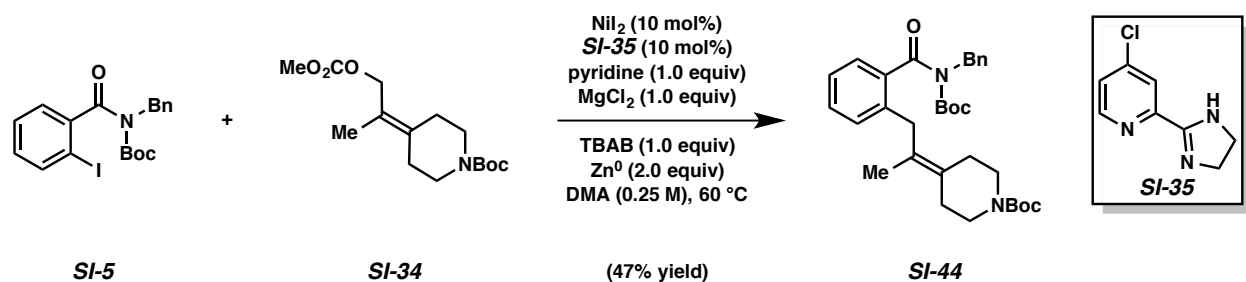

**Imide SI-44.** After following the representative procedure with iodo-imide **SI-5** (1.08 g, 2.47 mmol, 1.0 equiv), the crude reaction mixture was vigorously stirred with 2:1 1 N NaOH/THF (30 mL) solution for 22 h to remove residual carbonate **SI-34**. Purification by flash chromatography (199:1 Benzene:EtOAc  $\rightarrow$  24:1 Benzene:EtOAc) afforded imide **SI-44** (622 mg, 47% yield) as a colorless oil. Imide **SI-44**:  $R_f$  0.49 (3:1 Hexanes:EtOAc);  $^1\text{H}$  NMR (500 MHz,  $\text{CDCl}_3$ ):  $\delta$  7.44 (d,  $J = 7.9$ , 2H), 7.34 (tt,  $J = 7.6$ , 1.4, 2H), 7.32–7.27 (m, 2H), 7.16 (td,  $J = 7.6$ , 1.0, 1H), 7.11 (td,  $J = 7.4$ , 1.3, 2H), 5.03 (s, 2H), 3.45 (s, 4H), 3.37 (s, 2H), 2.34 (t,  $J = 5.6$ , 2H), 2.27 (s, 2H), 1.63 (s, 3H), 1.47 (s, 9H) 1.11 (s, 9H);  $^{13}\text{C}$  NMR (125 MHz,  $\text{CDCl}_3$ ):  $\delta$  172.5, 155.1, 153.0, 138.6, 137.9, 137.2, 130.9, 129.6, 128.6, 128.4, 128.2, 127.6, 126.0, 125.7, 125.3, 83.5, 79.5, 48.1, 45.0 & 44.4 (1 carbon), 36.2, 29.8 & 29.7 (1 carbon), 28.6, 27.6, 18.5; IR (film): 2976, 1730, 1692, 1672, 1367, 1231, 1164, 1141  $\text{cm}^{-1}$ ; HRMS–APCI ( $m/z$ )  $[\text{M} + \text{H}]^+$  calcd for  $\text{C}_{32}\text{H}_{43}\text{N}_2\text{O}_5^+$ , 535.31665; found 535.31392.

*Note: The data for imide **SI-44** represents empirically observed chemical shifts from the  $^{13}\text{C}$  NMR spectrum, presumably due to the nitrogen-containing heterocycle.*

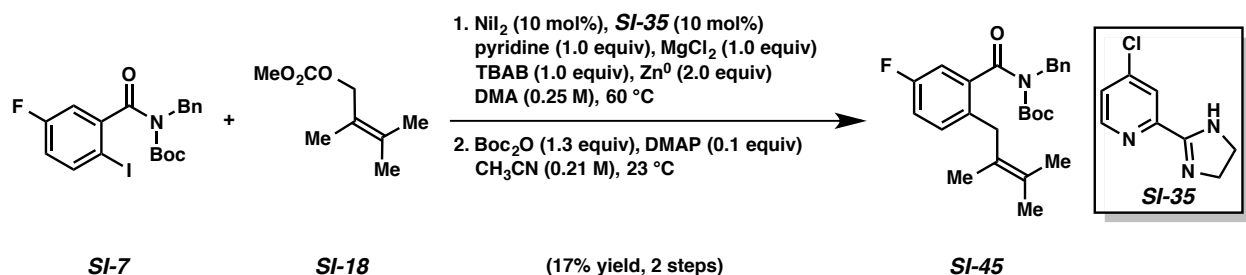

**Imide SI-45.** Following the representative procedure with iodo-imide **SI-7** (1.82g, 4.0 mmol) led to appreciable amounts of des-Boc coupled product. As such, the mixture was re-subjected to the general conditions used to install a boc group described in the synthesis of **5** (Section A.1).

Purification by flash chromatography (99:1 Pentane:Et<sub>2</sub>O → 49:1 Pentane:Et<sub>2</sub>O) afforded imide **SI-45** (275 mg, 17% yield, 2 steps) as an off-white oil. Imide **SI-45**: R<sub>f</sub> 0.64 (3:1 Hexanes:EtOAc); <sup>1</sup>H NMR (500 MHz, CDCl<sub>3</sub>): δ 7.42 (d, *J* = 7.8, 2H), 7.34 (tt, *J* = 7.2, 1.4, 2H), 7.28 (tt, *J* = 7.4, 1.4, 1H), 7.06 (dd, *J* = 8.6, 5.6, 1H), 6.98 (dt, *J* = 8.4, 2.7, 1H), 6.84 (dd, *J* = 8.6, 2.7, 1H) 5.02 (s, 2H), 3.34 (s, 2H), 1.74 (s, 3H), 1.68 (s, 3H), 1.56 (s, 3H), 1.16 (s, 9H); <sup>13</sup>C NMR (125 MHz, CDCl<sub>3</sub>): δ 171.2 (d, *J* = 2.4), 160.7 (d, *J* = 246), 152.6, 139.9 (d, *J* = 6.8), 137.7, 133.0 (d, *J* = 3.3), 130.0 (d, *J* = 7.6), 128.6, 128.3, 127.6, 127.5, 125.2, 116.1 (d, *J* = 21), 113.0 (d, *J* = 23), 83.8, 48.0, 36.1, 27.6, 20.8, 20.7, 18.7; <sup>19</sup>F NMR (376 MHz, CDCl<sub>3</sub>): δ -117.9, (s, 1F); IR (film): 2982, 2920, 1734, 1673, 1369, 1331, 1229, 1149 cm<sup>-1</sup>; HRMS–APCI (*m/z*) [M + H]<sup>+</sup> calcd for C<sub>25</sub>H<sub>31</sub>FNO<sub>3</sub><sup>+</sup>, 412.22825; found 412.22781.

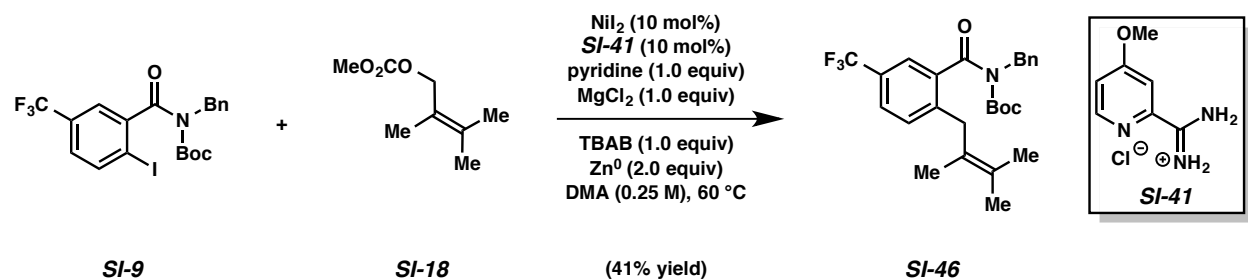

**Imide SI-46.** Following the representative procedure with iodo-imide **SI-9** (455 mg, 0.9 mmol), purification by flash chromatography (199:1 Benzene:EtOAc) yielded imide **SI-46** (169 mg, 41% yield) as a yellow oil. Imide **SI-46**: R<sub>f</sub> 0.75 (3:1 Hexanes:EtOAc); <sup>1</sup>H NMR (500 MHz, CDCl<sub>3</sub>): δ 7.54 (dd, *J* = 8.2, 1.4, 1H), 7.43 (d, *J* = 8.0, 2H), 7.37 (d, *J* = 1.5, 1H), 7.35 (tt, *J* = 7.8, 1.4, 2H), 7.29 (tt, *J* = 7.4, 1.3, 1H), 7.24 (d, *J* = 8.1, 1H) 5.05 (s, 2H), 3.44 (s, 2H), 1.76 (s, 3H), 1.69 (s, 3H), 1.58 (s, 3H), 1.12 (s, 9H); <sup>13</sup>C NMR (125 MHz, CDCl<sub>3</sub>): δ 171.2, 152.4, 141.7, 139.3, 137.6, 128.9, 128.7, 128.4, 128.3, 128.2, 127.7, 125.9 (q, *J* = 3.7), 124.4, 124.1 (q, *J* = 274), 122.8 (q, *J* = 3.7), 84.0, 48.1, 36.9, 27.5, 20.78, 20.75, 18.9; <sup>19</sup>F NMR (376 MHz, CDCl<sub>3</sub>): δ -62.4, (s, 3F); IR (film): 2983, 1736, 1672, 1318, 1141, 1123 cm<sup>-1</sup>; HRMS–APCI (*m/z*) [M + H]<sup>+</sup> calcd for C<sub>26</sub>H<sub>31</sub>F<sub>3</sub>NO<sub>3</sub><sup>+</sup>, 462.22505; found 462.22240.

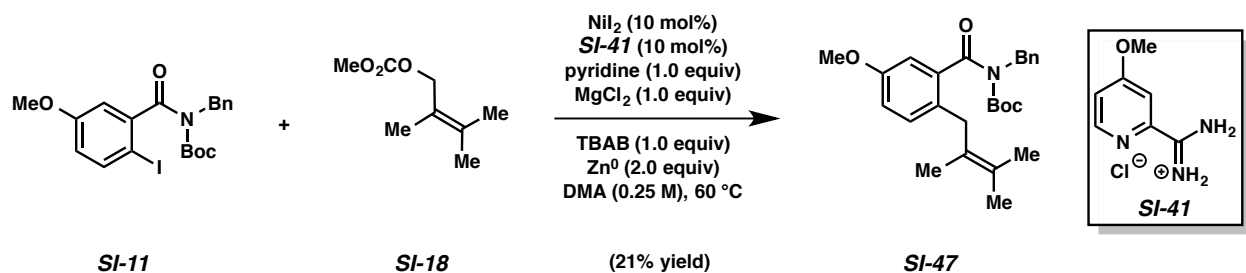

**Imide SI-46.** Following the representative procedure with iodo-imide **SI-11** (0.42 g, 0.9 mmol), purification by flash chromatography (99:1 Hexanes:EtOAc) yielded imide **SI-47** (79 mg, 21% yield) as a colorless oil. Imide **SI-47**:  $R_f$  0.52 (4:1 Hexanes:EtOAc);  $^1\text{H}$  NMR (500 MHz,  $\text{CDCl}_3$ ):  $\delta$  7.45–7.42 (m, 2H), 7.36–7.31 (m, 2H), 7.29–7.25 (m, 1H), 7.00 (d,  $J = 8.6$ , 1H), 6.84 (dd,  $J = 8.6, 2.8$ , 1H), 6.66 (d,  $J = 2.8$ , 1H), 5.02 (s, 2H), 3.74 (s, 3H), 3.33 (s, 2H), 1.73 (s, 3H), 1.69 (s, 3H), 1.56 (s, 3H), 1.14 (s, 9H);  $^{13}\text{C}$  NMR (125 MHz,  $\text{CDCl}_3$ ):  $\delta$  172.4, 157.5, 153.0, 139.4, 138.0, 129.60, 129.57, 128.7, 128.5, 127.6, 127.0, 125.8, 115.3, 111.5, 83.5, 55.6, 48.1, 36.0, 27.7, 20.84, 20.81, 18.8; IR (film): 2980, 1730, 1672, 1142, 1039, 851  $\text{cm}^{-1}$ ; HRMS–APCI ( $m/z$ )  $[\text{M} + \text{H}]^+$  calcd for  $\text{C}_{26}\text{H}_{34}\text{NO}_4^+$ , 424.24824; found 424.24803.

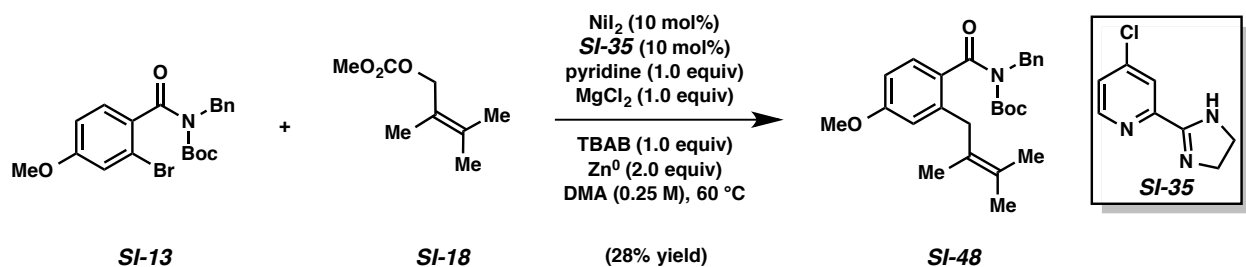

**Imide SI-48:** Following the representative procedure with bromo-imide **SI-13** (0.84 g, 2.0 mmol), purification by flash chromatography (98:2 Hexanes:EtOAc) yielded imide **SI-48** (0.24 g, 28% yield) as a colorless oil. Imide **SI-48**:  $R_f$  0.40 (9:1 Hexanes:EtOAc);  $^1\text{H}$  NMR (500 MHz,  $\text{CDCl}_3$ ):  $\delta$  7.44–7.42 (m, 2H), 7.35–7.32 (m, 2H), 7.28–7.24 (m, 1H), 7.13–7.10 (m, 1H), 6.69–6.66 (m, 2H), 5.00 (s, 2H), 3.78 (s, 3H), 3.47 (s, 2H), 1.75 (s, 3H), 1.70 (s, 3H), 1.59 (s, 3H), 1.15 (s, 9H);  $^{13}\text{C}$  NMR (125 MHz,  $\text{CDCl}_3$ ): (20 of 21 signals observed)  $\delta$  172.5, 160.9, 153.3, 140.7, 138.1, 131.0, 128.6, 128.34, 128.30, 127.4, 125.3, 114.7, 109.7, 83.0, 55.4, 48.4, 37.0, 27.7, 20.8, 18.9; IR (film): 2979, 1726, 1328, 1227, 966, 626  $\text{cm}^{-1}$ ; HRMS–APCI ( $m/z$ )  $[\text{M} + \text{H}]^+$  calcd for  $\text{C}_{26}\text{H}_{34}\text{NO}_4^+$ , 424.24824; found 424.24858.

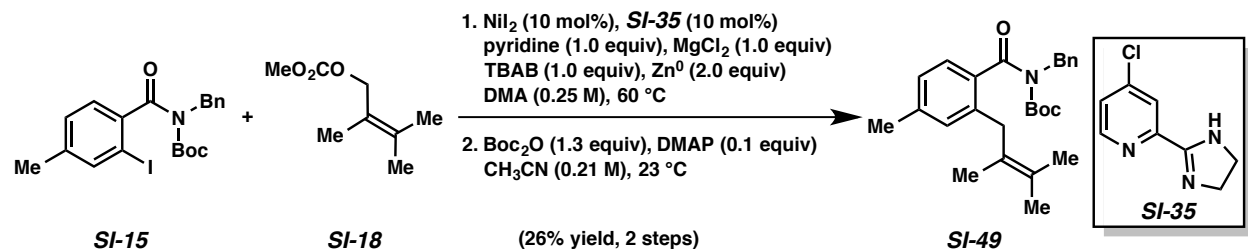

**Imide SI-49.** Following the representative procedure with iodo-imide **SI-15** (2.1 g, 4.5 mmol) led to appreciable amounts of des-Boc coupled product. As such, the mixture was re-subjected to the general conditions used to install a boc group described in the synthesis of **5** (Section A.1). Purification by flash chromatography (9:1 Hexanes:EtOAc) afforded imide **SI-49** (0.48 g, 26% yield, 2 steps) as a colorless oil. Imide **SI-49**:  $R_f$  0.51 (9:1 Hexanes:EtOAc);  $^1\text{H}$  NMR (500 MHz,  $\text{CDCl}_3$ ):  $\delta$  7.42–7.39 (m, 2H), 7.33–7.29 (m, 2H), 7.27–7.22 (m, 1H), 7.01 (d,  $J = 7.7$ , 1H), 6.94 (d,  $J = 7.7$ , 1H), 6.88 (s, 1H), 5.00 (s, 2H), 3.41 (s, 2H), 2.30 (s, 3H), 1.73 (s, 3H), 1.69 (s, 3H), 1.56 (s, 3H), 1.11 (s, 9H);  $^{13}\text{C}$  NMR (125 MHz,  $\text{CDCl}_3$ ):  $\delta$  172.6, 153.0, 139.4, 137.9, 137.7, 135.5, 129.0, 128.4, 128.1, 127.2, 126.7, 126.1, 125.9, 125.4, 83.0, 47.9, 36.6, 27.4, 21.5, 20.6, 18.6; IR (film): 2980, 1728, 1670, 1229, 1142, 969  $\text{cm}^{-1}$ ; HRMS–APCI ( $m/z$ )  $[\text{M} + \text{H}]^+$  calcd for  $\text{C}_{26}\text{H}_{33}\text{NO}_3^+$ , 408.25332; found 408.25332.

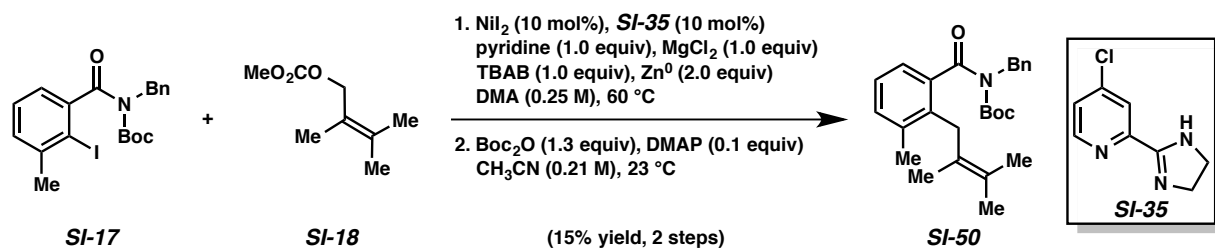

**Imide SI-50.** Following the representative procedure with iodo-imide **SI-17** (0.93 g, 2.0 mmol) led to appreciable amounts of des-Boc coupled product. As such, the mixture was re-subjected to the general conditions used to install a boc group described in the synthesis of **5** (Section A.1). Purification by flash chromatography (9:1 Hexanes:EtOAc) afforded imide **SI-50** (102 mg, 15% yield, 2 steps) as a colorless oil. Imide **SI-50**:  $R_f$  0.57 (4:1 Hexanes:EtOAc);  $^1\text{H}$  NMR (500 MHz,  $\text{CDCl}_3$ ):  $\delta$  7.42–7.39 (m, 2H), 7.34–7.30 (m, 2H), 7.28–7.24 (m, 1H), 7.13 (d,  $J = 8.0$ , 1H), 7.06 (t,  $J = 8.0$ , 1H), 6.95 (d,  $J = 8.0$ , 1H), 5.00 (s, 2H), 3.43 (br s, 2H), 2.21 (s, 3H), 1.74 (s, 3H), 1.67 (s, 3H), 1.39 (s, 3H), 1.10 (s, 9H);  $^{13}\text{C}$  NMR (125 MHz,  $\text{CDCl}_3$ ):  $\delta$  173.1, 153.0, 139.6, 138.3, 138.2, 136.5, 131.2, 128.6, 128.4, 127.5, 125.7, 125.3, 125.1, 123.8, 83.8, 48.0, 34.8, 27.6,

21.1, 20.7, 19.8, 16.9; IR (film): 2979, 1729, 1674, 1368, 1144, 698  $\text{cm}^{-1}$ ; HRMS–APCI ( $m/z$ )  $[\text{M} + \text{H}]^+$  calcd for  $\text{C}_{26}\text{H}_{34}\text{NO}_3^+$ , 408.25332; found 408.25311.

## B. Initial Evaluation of Ligand Effects and Reaction Conditions

### Representative Procedure for the Nickel-Catalyzed Heck Cyclization of Imides

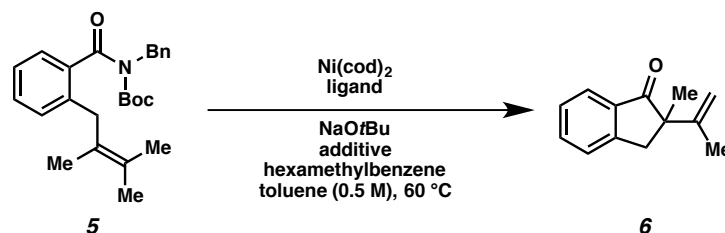

**Indanone 6 (Table 1).** A dram vial containing imide **5** (39.3 mg, 0.10 mmol, 1.0 equiv), hexamethylbenzene, and a magnetic stir bar was sequentially charged with the appropriate ligand,  $\text{Ni}(\text{cod})_2$ , and  $\text{NaOt-Bu}$  in a glovebox. Subsequently, toluene (0.20 mL) and the additive (when applicable) were added. The vial was sealed with a Teflon-lined screw cap, removed from the glove box, wrapped with Teflon tape, and stirred at the appropriate temperature for 24 h. After cooling to room temperature, the mixture was diluted with Hexanes (1.0 mL) and filtered through a plug of silica gel (10 mL of EtOAc eluent). The volatiles were removed under reduced pressure, and the yield was determined by  $^1\text{H}$  NMR analysis with hexamethylbenzene as the internal standard.

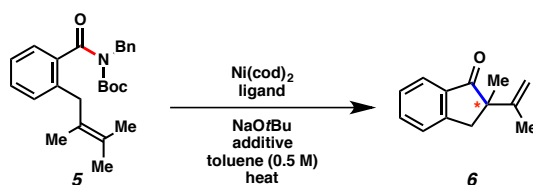

| Entry | $\text{Ni}(\text{cod})_2$ (loading) | Ligand (loading)   | Additive                            | Temp.  | Yield <sup>b</sup> |
|-------|-------------------------------------|--------------------|-------------------------------------|--------|--------------------|
| 1     | 20 mol%                             | <b>7</b> (40 mol%) | none                                | 100 °C | 0%                 |
| 2     | 20 mol%                             | <b>8</b> (40 mol%) | none                                | 100 °C | 24%                |
| 3     | 20 mol%                             | <b>9</b> (40 mol%) | none                                | 100 °C | 76%                |
| 4     | 20 mol%                             | <b>9</b> (20 mol%) | none                                | 100 °C | 67%                |
| 5     | 10 mol%                             | <b>9</b> (20 mol%) | none                                | 100 °C | 51%                |
| 6     | 15 mol%                             | <b>9</b> (30 mol%) | none                                | 100 °C | 91%                |
| 7     | 15 mol%                             | <b>9</b> (30 mol%) | <i>t</i> -amyl alcohol <sup>c</sup> | 60 °C  | 95%                |

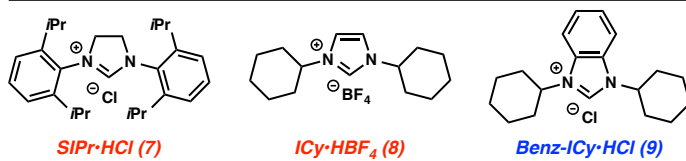

### C. Scope of Methodology

**Representative Procedure for the Nickel-Catalyzed Heck Cyclization of Imides (synthesis of indanone **6** is used as an example).**

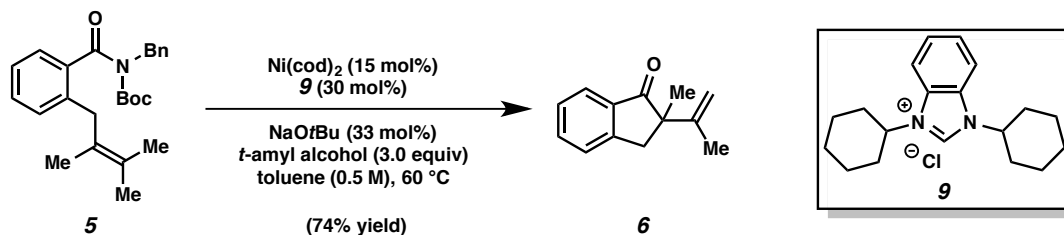

**Indanone **6** (Table 2).** A dram vial containing imide **5** (39.3 mg, 0.10 mmol, 1.0 equiv) and a magnetic stir bar was sequentially charged with **9** (9.6 mg, 0.030 mmol, 30 mol%), Ni(cod)<sub>2</sub> (4.1 mg, 0.015 mmol, 15 mol%), and NaO*t*-Bu (3.2 mg, 0.033 mmol, 33 mol%) in a glovebox. Subsequently, toluene (0.20 mL) and then *t*-amyl alcohol (32 μL, 0.30 mmol, 3.0 equiv) were added. The vial was sealed with a Teflon-lined screw cap, removed from the glovebox, wrapped with Teflon tape and stirred at 60 °C for 24 h. After cooling to room temperature, the mixture was diluted with hexanes (1.0 mL) and filtered through a plug of silica gel (10 mL of EtOAc eluent). The volatiles were removed under reduced pressure. <sup>1</sup>H NMR analysis of the crude reaction mixture indicated a 95% yield (average of two experiments) of ketone **6** relative to a hexamethylbenzene external standard. Purification by preparative thin-layer chromatography (3:1 Hexanes:EtOAc) afforded indanone **6** (74% yield, average of two experiments) as a colorless oil. The diminished isolated yields of **6** can be attributed to the volatility of the neat compound. Indanone **6**: R<sub>f</sub> 0.59 (3:1 Hexanes:EtOAc); <sup>1</sup>H NMR (500 MHz, CDCl<sub>3</sub>): δ 7.78 (d, *J* = 7.7, 1H), 7.61 (td, *J* = 7.5, 1.1, 1H), 7.45 (dt, *J* = 7.7, 0.9, 1H), 7.38 (td, *J* = 7.5, 0.7, 1H), 4.95 (m, 2H), 3.33 (d, *J* = 17.4, 1H), 2.95 (d, *J* = 17.4, 1H), 1.65 (s, 3H), 1.38 (s, 3H); <sup>13</sup>C NMR (125 MHz, CDCl<sub>3</sub>): δ 209.2, 152.7, 145.9, 135.9, 135.0, 127.6, 126.5, 124.6, 112.1, 54.5, 41.3, 22.7, 19.9; IR (film): 2966, 2928, 1710, 1604, 1464, 1277 cm<sup>-1</sup>; HRMS–APCI (*m/z*) [M + H]<sup>+</sup> calcd for C<sub>13</sub>H<sub>15</sub>O, 187.11174; found 187.11130.

*Any modifications of the conditions shown in the representative procedure above are specified in the following schemes, which depict all of the results shown in Table 2 and Figure 2.*





experiments) as a ~1:1 mixture of olefin isomers. Iterative purification by preparative thin-layer chromatography (Benzene) afforded analytical samples of **12a** and **12b** as colorless oils. Indanone **12a**:  $R_f$  0.47 (benzene);  $^1\text{H}$  NMR (500 MHz,  $\text{CDCl}_3$ ):  $\delta$  7.77 (d,  $J = 7.6$ , 1H) 7.59 (td,  $J = 7.6$ , 1.1, 1H), 7.43 (d,  $J = 7.6$ , 1H), 7.37 (t,  $J = 7.6$ , 1H), 6.00 (ddd,  $J = 7.5$ , 4.2, 3.3, 1H), 5.45 (d,  $J = 9.9$ , 1H), 3.14 (d,  $J = 17.1$ , 1H), 3.07 (d,  $J = 17.1$ , 1H), 2.22–2.13 (m, 1H), 2.13–2.04 (m, 1H), 2.04–1.96 (m, 1H), 1.90 (td,  $J = 11.6$ , 2.7, 1H), 1.69–1.57 (m, 2H);  $^{13}\text{C}$  NMR (125 MHz,  $\text{CDCl}_3$ ):  $\delta$  210.1, 152.6, 135.9, 135.0, 130.2, 128.3, 127.7, 126.7, 124.7, 51.4, 42.6, 32.8, 24.6, 19.5; IR (film): 3019, 2930, 1712, 1605, 1464, 1282  $\text{cm}^{-1}$ ; HRMS–APCI ( $m/z$ )  $[\text{M} + \text{H}]^+$  calcd for  $\text{C}_{14}\text{H}_{15}\text{O}^+$ , 199.11174; found 199.11026. Indanone **12b**:  $R_f$  0.50 (benzene);  $^1\text{H}$  NMR (500 MHz,  $\text{CDCl}_3$ ):  $\delta$  7.77 (d,  $J = 7.7$ , 1H) 7.59 (td,  $J = 7.6$ , 0.9, 1H), 7.44 (d,  $J = 7.5$ , 1H), 7.38 (t,  $J = 7.5$ , 1H), 5.79 (m, 2H), 3.06 (d,  $J = 17.3$ , 1H), 2.93 (d,  $J = 17.3$ , 1H), 2.48 (dq,  $J = 17.7$ , 2.5, 1H), 2.30–2.14 (m, 2H), 1.91 (ddd,  $J = 17.5$ , 11.1, 6.6, 1H), 1.79 (dt,  $J = 17.7$ , 2.5, 1H), 1.50 (dt,  $J = 17.5$ , 2.7, 1H);  $^{13}\text{C}$  NMR (125 MHz,  $\text{CDCl}_3$ ):  $\delta$  211.3, 153.0, 136.0, 135.0, 127.6, 126.81, 126.76, 125.3, 124.5, 48.5, 39.2, 34.1, 28.7, 22.8; IR (film): 3026, 2925, 2840, 1712, 1608, 1284  $\text{cm}^{-1}$ ; HRMS–APCI ( $m/z$ )  $[\text{M} + \text{H}]^+$  calcd for  $\text{C}_{14}\text{H}_{15}\text{O}^+$ , 199.11174; found 199.11028.

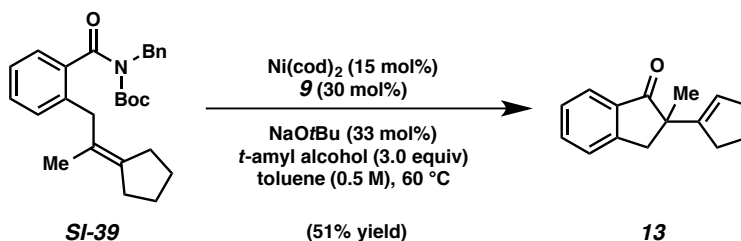

**Indanone 13 (Table 2).** Purification by preparative thin-layer chromatography (97:3 Benzene: $\text{CH}_3\text{CN}$ ) afforded indanone **13** (51% yield, average of two experiments) as a colorless oil. Indanone **13**:  $R_f$  0.25 (9:1 Hexane:EtOAc);  $^1\text{H}$  NMR (500 MHz,  $\text{CDCl}_3$ ):  $\delta$  7.77 (d,  $J = 7.7$ , 1H), 7.60 (dt,  $J = 7.5$ , 1.2, 1H), 7.44 (td,  $J = 7.7$ , 0.9, 1H), 7.37 (dt,  $J = 7.5$ , 0.9, 1H), 5.57 (quint,  $J = 2.2$ , 1H), 3.32 (d,  $J = 17.2$ , 1H), 2.97 (d,  $J = 17.2$ , 1H), 2.34–2.20 (m, 3H), 2.15–2.06 (m, 1H), 1.88–1.78 (m, 2H), 1.41 (s, 3H);  $^{13}\text{C}$  NMR (125 MHz,  $\text{CDCl}_3$ ):  $\delta$  208.9, 152.7, 145.5, 135.8, 135.0, 127.6, 126.6, 125.7, 124.7, 51.6, 41.4, 32.4, 32.2, 23.6, 22.9; IR (film): 2956, 2929, 2846, 1713, 1608, 1464, 1280  $\text{cm}^{-1}$ ; HRMS–APCI ( $m/z$ )  $[\text{M} + \text{H}]^+$  calcd for  $\text{C}_{15}\text{H}_{17}\text{O}^+$ , 213.12739; found 213.12580.

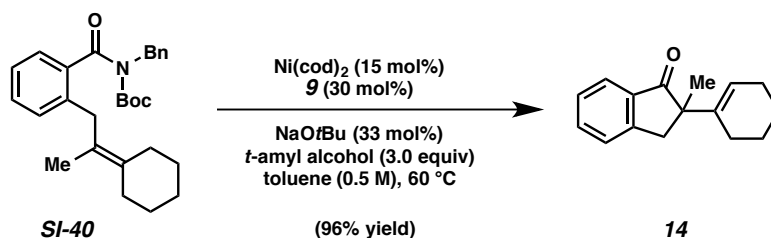

**Indanone 14** (Table 2). Purification by preparative thin-layer chromatography (9:1 Benzene:CH<sub>3</sub>CN) afforded indanone **14** (96% yield, average of two experiments) as a colorless oil. Indanone **14**: *R<sub>f</sub>* 0.48 (9:1 Hexanes:EtOAc); <sup>1</sup>H NMR (500 MHz, CDCl<sub>3</sub>): δ 7.76 (d, *J* = 7.6, 1H), 7.59 (td, *J* = 7.6, 1.2, 1H), 7.43 (dt, *J* = 7.6, 0.9, 1H), 7.39–7.34 (m, 1H), 5.65 (d, *J* = 17.6, 1H), 3.29 (d, *J* = 17.4, 1H), 2.91 (d, *J* = 17.4, 1H), 2.13–1.99 (m, 2H), 1.92–1.83 (m, 1H), 1.79–1.70 (m, 1H), 1.63–1.50 (m, 4H), 1.33 (s, 3H); <sup>13</sup>C NMR (125 MHz, CDCl<sub>3</sub>): δ 210.2, 153.1, 138.5, 136.3, 134.9, 127.5, 126.6, 124.5, 122.4, 54.6, 41.7, 25.5 (two carbons), 23.1, 22.32, 22.28; IR (film): 2928, 1712, 1464, 1153, 736 cm<sup>-1</sup>; HRMS–APCI (*m/z*) [M + H]<sup>+</sup> calcd for C<sub>16</sub>H<sub>19</sub>O<sup>+</sup>, 227.14304; found 227.14236.

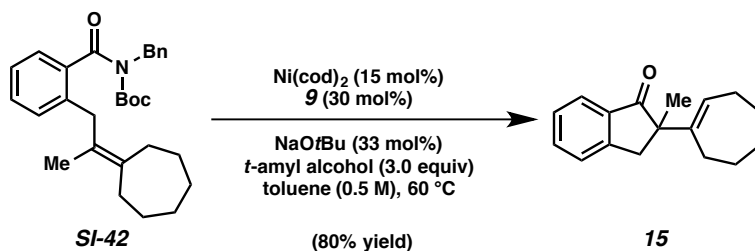

**Indanone 15** (Table 2). Purification by preparative thin-layer chromatography (97:3 Benzene:CH<sub>3</sub>CN) afforded indanone **15** (80% yield, average of two experiments) as a colorless oil. Indanone **15**: *R<sub>f</sub>* 0.48 (9:1 Hexane:EtOAc); <sup>1</sup>H NMR (500 MHz, CDCl<sub>3</sub>): δ 7.78 (d, *J* = 7.7, 1H), 7.60 (dt, *J* = 7.5, 1.2, 1H), 7.44 (td, *J* = 7.7, 0.9, 1H), 7.37 (dt, *J* = 7.5, 0.9, 1H), 5.86 (t, *J* = 6.8, 1H), 3.26 (d, *J* = 17.4, 1H), 2.89 (d, *J* = 17.4, 1H), 2.22–2.10 (m, 2H), 1.98 (ddd, *J* = 14.9, 9.5, 1.7, 1H), 1.89 (ddd, *J* = 14.9, 8.9, 1.7, 1H), 1.78–1.64 (m, 2H), 1.55–1.45 (m, 2H) 1.45–1.30 (m, 2H), 1.29 (s, 3H); <sup>13</sup>C NMR (125 MHz, CDCl<sub>3</sub>): δ 210.0, 153.1, 145.0, 136.4, 134.9, 127.5, 127.4, 126.7, 124.6, 55.9, 40.9, 33.0, 31.1, 28.5, 27.4, 26.9, 22.7; IR (film): 2920, 2947, 1710, 1607, 1463, 1440, 1750 cm<sup>-1</sup>; HRMS–APCI (*m/z*) [M + H]<sup>+</sup> calcd for C<sub>17</sub>H<sub>21</sub>O<sup>+</sup>, 241.15869; found 241.15748.

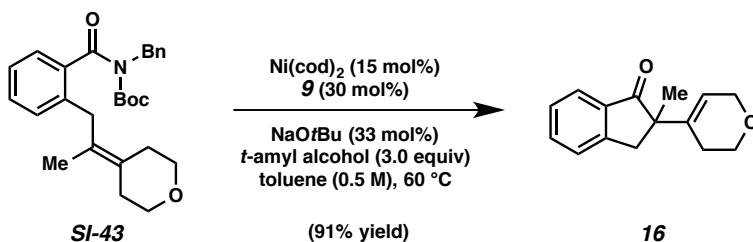

**Indanone 16 (Table 2).** Purification by preparative thin-layer chromatography (2:1 Hexanes:EtOAc) afforded indanone **16** (91% yield, average of two experiments) as a colorless oil. Indanone **16**:  $R_f$  0.34 (3:1 Hexanes:EtOAc);  $^1\text{H NMR}$  (400 MHz,  $\text{CDCl}_3$ ):  $\delta$  7.77 (d,  $J = 7.8$ , 1H), 7.61 (td,  $J = 7.6$ , 1.3, 1H), 7.45 (dt,  $J = 7.8$ , 1.0, 1H), 7.39 (t,  $J = 7.6$ , 1H), 5.65 (app sext,  $J = 1.4$ , 1H), 4.19 (app tquint,  $J = 16.4$ , 2.6, 2H), 3.73 (td,  $J = 5.0$ , 1.1, 2H), 3.34 (d,  $J = 17.3$ , 1H), 2.95 (d,  $J = 17.3$ , 1H), 2.12 (m, 1H), 1.86 (m, 1H), 1.37 (s, 3H);  $^{13}\text{C NMR}$  (125 MHz,  $\text{CDCl}_3$ ):  $\delta$  209.0, 152.8, 136.4, 136.0, 135.2, 127.8, 126.6, 124.7, 121.4, 65.9, 64.3, 54.0, 41.0, 25.6, 22.1; IR (film): 2961, 2927, 2850, 1709, 1606, 1464, 1277, 1127  $\text{cm}^{-1}$ ; HRMS–APCI ( $m/z$ ) [ $\text{M} + \text{H}$ ] $^+$  calcd for  $\text{C}_{15}\text{H}_{17}\text{O}_2^+$ , 229.12231; found 229.12094.

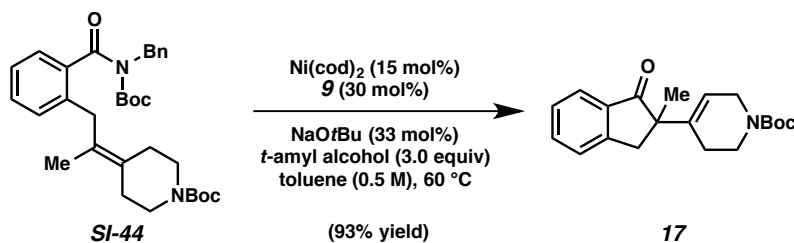

**Indanone 17 (Table 2).** Purification by preparative thin-layer chromatography (2:1 Hexanes:EtOAc) afforded indanone **17** (93% yield, average of two experiments) as a colorless oil. Indanone **17**:  $R_f$  0.37 (3:1 Hexanes:EtOAc);  $^1\text{H NMR}$  (400 MHz,  $\text{CDCl}_3$ ):  $\delta$  7.77 (d  $J = 7.6$ , 1H) 7.61 (td,  $J = 7.6$ , 1.1, 1H), 7.45 (d,  $J = 7.7$ , 1H), 7.39 (t,  $J = 7.7$ , 1H), 5.61 (br s, 1H), 3.93 (s, 2H), 3.43 (t,  $J = 4.7$ , 2H), 3.30 (d,  $J = 17.4$ , 1H), 2.95 (d,  $J = 17.4$ , 1H), 2.06 (m, 1H), 1.87 (m, 1H), 1.45 (s, 9H), 1.36 (s, 3H);  $^{13}\text{C NMR}$  (125 MHz,  $\text{CDCl}_3$ ):  $\delta$  209.1, 154.9, 152.7, 137.5, 135.9, 135.2, 127.8, 126.6, 124.7, 119.6, 79.7, 54.1, 43.5, 41.0, 39.7, 28.6, 25.7, 22.3; IR (film): 2975, 2931, 1695, 1419, 1365, 1241, 1171  $\text{cm}^{-1}$ ; HRMS–ESI ( $m/z$ ) [ $\text{M} + \text{Na}$ ] $^+$  calcd for  $\text{C}_{20}\text{H}_{25}\text{NNaO}_3^+$ , 350.1732; found 350.1736.

Note: The data for indanone **17** represents empirically observed chemical shifts from the  $^{13}\text{C}$  NMR spectrum, presumably due to the nitrogen-containing heterocycle.

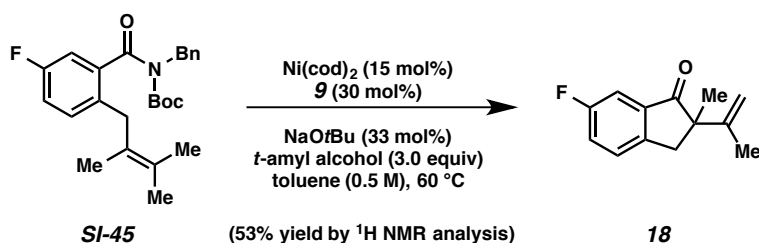

**Indanone 18 (Figure 2).**  $^1\text{H}$  NMR analysis of the crude reaction mixture indicated a 53% yield (average of two experiments) of ketone **18** relative to a hexamethylbenzene external standard. Purification by preparative thin-layer chromatography (97:3 Benzene:  $\text{CH}_3\text{CN}$ ) afforded an analytical sample of **18** as an off-white oil. Diminished isolated yields (i.e. <50%) for **18** were observed and can be attributed to the volatility of the neat compound. Indanone **18**:  $R_f$  0.59 (3:1 Hexanes:EtOAc);  $^1\text{H}$  NMR (500 MHz,  $\text{CDCl}_3$ ):  $\delta$  7.44–7.39 (m, 2H), 7.32 (td,  $J = 8.6, 2.4$ , 1H), 4.94 (m, 2H), 3.29 (d,  $J = 17.8$ , 1H), 2.91 (d,  $J = 17.8$ , 1H), 1.65 (q,  $J = 0.7$ , 3H), 1.38 (s, 3H);  $^{13}\text{C}$  NMR (125 MHz,  $\text{CDCl}_3$ ):  $\delta$  208.3 (d,  $J = 2.6$ ), 162.5 (d,  $J = 248$ ), 148.1 (d,  $J = 2.1$ ), 145.6, 137.7 (d,  $J = 7.0$ ), 128.0 (d,  $J = 7.9$ ), 122.8 (d,  $J = 24$ ), 112.4, 110.4 (d,  $J = 22$ ), 55.7, 40.8, 22.7, 20.0;  $^{19}\text{F}$  NMR (376 MHz,  $\text{CDCl}_3$ ):  $\delta$  -114.3 (s, 1F); IR (film): 2970, 2929, 1712, 1484, 1447, 1263  $\text{cm}^{-1}$ ; HRMS–APCI ( $m/z$ ) [ $\text{M} + \text{H}$ ] $^+$  calcd for  $\text{C}_{13}\text{H}_{14}\text{FO}^+$ , 205.10232; found 205.10239.

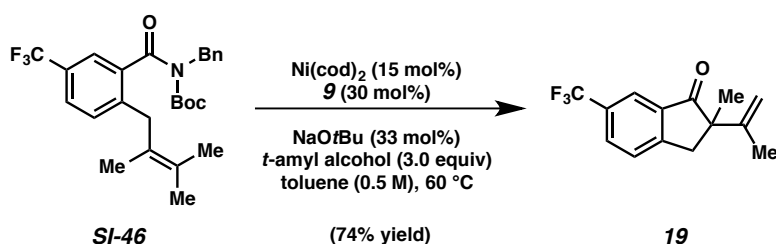

**Indanone 19 (Figure 2).** Purification by preparative thin-layer chromatography (4:1 Hexanes:EtOAc) afforded indanone **19** (74% yield, average of two experiments) as a yellow oil. Indanone **19**:  $R_f$  0.69 (3:1 Hexanes:EtOAc);  $^1\text{H}$  NMR (500 MHz,  $\text{CDCl}_3$ ):  $\delta$  8.05 (s, 1H), 7.32 (dd,  $J = 7.9, 1.3$ , 1H), 7.59 (d,  $J = 7.9$ , 1H), 4.97 (quint,  $J = 1.1$ , 1H), 4.95 (s, 1H), 3.40 (d,  $J = 18.0$ , 1H), 3.02 (d,  $J = 18.0$ , 1H), 1.67 (q,  $J = 0.7$ , 3H), 1.40 (s, 3H);  $^{13}\text{C}$  NMR (125 MHz,  $\text{CDCl}_3$ ):  $\delta$  207.9, 156.0, 145.2, 136.4, 131.5 (q,  $J = 3.5$ ), 130.6 (q,  $J = 33$ ), 127.3, 123.9 (q,  $J =$

273), 122.0 (d,  $J = 3.9$ ), 112.8, 55.2, 41.4, 22.7, 20.0;  $^{19}\text{F}$  NMR (376 MHz,  $\text{CDCl}_3$ ):  $\delta$  -62.5 (s, 3F); IR (film): 2972, 2936, 1722, 1625, 1332, 1257, 1184, 1128  $\text{cm}^{-1}$ ; HRMS–APCI ( $m/z$ ) [ $\text{M} + \text{H}$ ] $^+$  calcd for  $\text{C}_{14}\text{H}_{14}\text{F}_3\text{O}^+$ , 255.09913; found 255.09744.

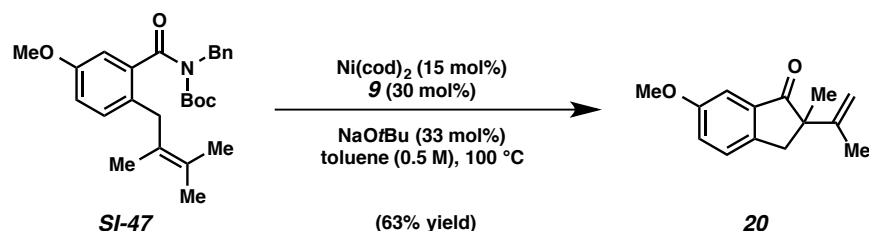

**Indanone 20 (Figure 2).** Purification by preparative thin-layer chromatography (99:1 Benzene: $\text{CH}_3\text{CN}$ ) afforded indanone **20** (63% yield, average of two experiments) as a white crystalline solid. Indanone **20**: mp: 41–43 °C;  $R_f$  0.32 (10:1 Hexanes:EtOAc);  $^1\text{H}$  NMR (500 MHz,  $\text{CDCl}_3$ ):  $\delta$  7.33 (d,  $J = 8.0$ , 1H), 7.23–7.18 (m, 2H), 4.95 (m, 2H), 3.84 (s, 3H), 3.24 (d,  $J = 17.4$ , 1H), 2.87 (d,  $J = 17.4$ , 1H), 1.64 (s, 3H), 1.37 (s, 3H);  $^{13}\text{C}$  NMR (125 MHz,  $\text{CDCl}_3$ ):  $\delta$  209.2, 159.5, 145.9, 145.5, 137.0, 127.2, 124.5, 112.0, 105.5, 55.6, 40.6, 22.7, 19.8; IR (film): 2964, 1707, 1275, 1280, 894  $\text{cm}^{-1}$ ; HRMS–APCI ( $m/z$ ) [ $\text{M} + \text{H}$ ] $^+$  calcd for  $\text{C}_{14}\text{H}_{18}\text{O}_2^+$ , 217.12231; found 217.12123.

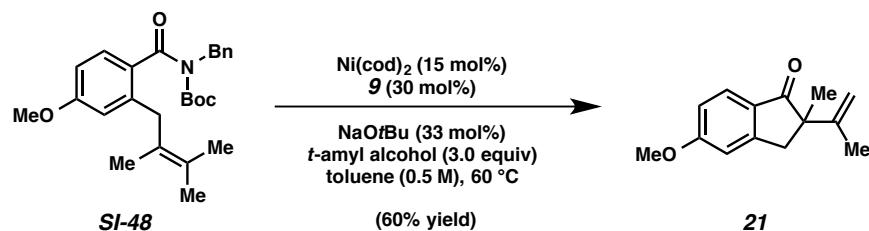

**Indanone 21 (Figure 2).** Purification by preparative thin-layer chromatography (9:1 Hexanes: $\text{Et}_3\text{N}$ ) afforded indanone **21** (60% yield, average of two experiments). Spectral data match those previously reported.<sup>10</sup>

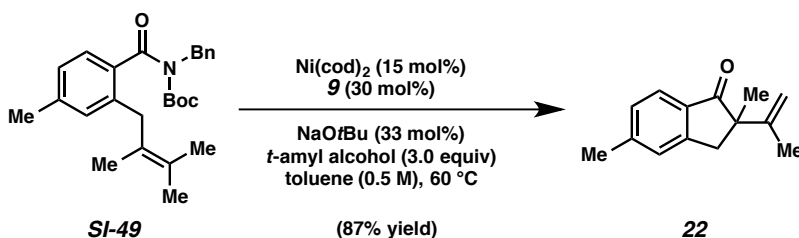

**Indanone 22 (Figure 2).** Purification by preparative thin-layer chromatography (9:1 Hexanes:EtOAc) afforded indanone **22** (87% yield, average of two experiments) as a colorless oil. Indanone **22**:  $R_f$  0.43 (9:1 Hexanes:EtOAc);  $^1\text{H NMR}$  (500 MHz,  $\text{CDCl}_3$ ):  $\delta$  7.67 (d,  $J = 7.8$ , 1H), 7.25–7.23 (m, 1H), 7.20–7.18 (m, 1H), 4.95–4.93 (m, 2H), 3.27 (d,  $J = 17.6$ , 1H), 2.89 (d,  $J = 17.4$ , 1H), 2.44 (s, 3H), 1.63 (s, 3H), 1.36 (s, 3H);  $^{13}\text{C NMR}$  (125 MHz,  $\text{CDCl}_3$ ):  $\delta$  208.8, 153.3, 146.3, 146.1, 133.7, 128.9, 126.9, 124.5, 112.0, 54.7, 41.2, 22.8, 22.2, 19.9; IR (film): 2965, 1705, 1608, 1322, 585  $\text{cm}^{-1}$ ; HRMS–APCI ( $m/z$ )  $[\text{M} + \text{H}]^+$  calcd for  $\text{C}_{14}\text{H}_{17}\text{O}^+$ , 201.12739; found 201.12719.

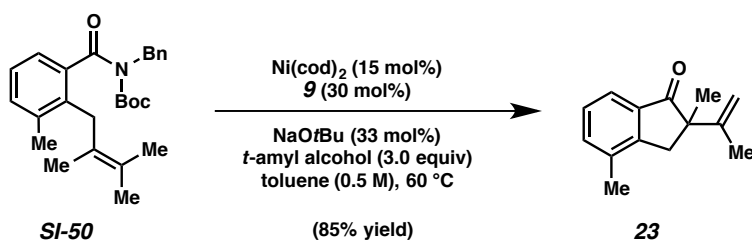

**Indanone 23 (Figure 2).** Purification by preparative thin-layer chromatography (9:1 Hexanes:EtOAc) afforded indanone **23** (85% yield, average of two experiments) as a colorless oil. Indanone **23**:  $R_f$  0.38 (10:1 Hexanes:EtOAc);  $^1\text{H NMR}$  (500 MHz,  $\text{CDCl}_3$ ):  $\delta$  7.63 (d,  $J = 7.4$ , 1H), 7.43 (d,  $J = 7.4$ , 1H), 7.31 (t,  $J = 7.4$ , 1H), 4.97–4.94 (m, 2H), 3.21 (d,  $J = 17.5$ , 1H), 2.84 (d,  $J = 17.4$ , 1H), 2.35 (s, 3H), 1.65 (s, 3H), 1.39 (s, 3H);  $^{13}\text{C NMR}$  (125 MHz,  $\text{CDCl}_3$ ):  $\delta$  209.5, 151.6, 146.0, 135.67, 135.66, 135.4, 127.8, 122.0, 112.0, 54.5, 40.3, 22.8, 19.9, 17.8; IR (film): 2966, 1708, 1591, 1268, 893  $\text{cm}^{-1}$ ; HRMS–APCI ( $m/z$ )  $[\text{M} + \text{H}]^+$  calcd for  $\text{C}_{14}\text{H}_{17}\text{O}^+$ , 201.12739; found 201.12701.

## D. Diastereoselective Heck Cyclization

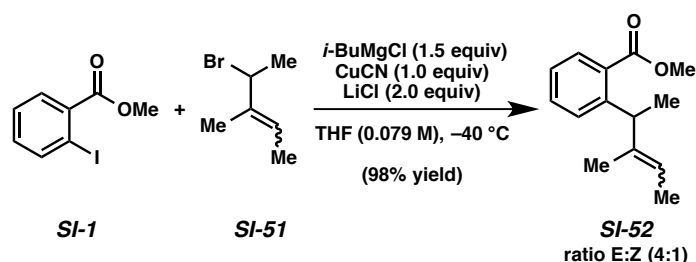

**Ester SI-52.** Following a modification of the general procedure reported by Querolle and co-workers,<sup>3</sup> a flask containing a stir bar was charged CuCN (680 mg, 7.50 mmol, 1.0 equiv) and LiCl (650 mg, 15.0 mmol, 2.0 equiv) in the glovebox. The flask was removed from the glovebox, and the solids were suspended in THF (25 mL). The resulting mixture was stirred vigorously until a completely dissolved solution of CuCN•2LiCl was formed. In a separate flask containing a solution of methyl-2-iodobenzoate (**SI-1**) (1.97 g, 7.50 mmol, 1.0 equiv) in THF (70 mL) at –40 °C was added *i*-BuMgCl (5.60 mL of a 2.0 M solution in THF, 11.3 mmol, 1.5 equiv) dropwise over 1 min at –40 °C. After this mixture was stirred at –40 °C for 1 h, the solution of CuCN•2LiCl was added via cannula. The combined mixture was stirred at –40 °C for an additional 15 min, at which point known bromide **SI-51**<sup>11</sup> (2.43 g, 15.0 mmol, 2.0 equiv) was added dropwise over 1 min. After stirring at –40 °C for an additional hour, the reaction was poured into 9:1 sat. aq. NH<sub>4</sub>Cl:NH<sub>4</sub>OH (100 mL). The layers were separated and the aqueous layer was extracted with EtOAc (3 x 75 mL). The organic layers were combined, dried over MgSO<sub>4</sub>, and concentrated under reduced pressure. The crude mixture was purified via flash chromatography (97:3 Hexanes:EtOAc) to afford ester **SI-52** (1.61 g, 98% yield) as an inseparable mixture of olefin isomers and as a colorless oil (4:1 mixture of alkene isomers). Configurational isomers of ester **SI-52** were analyzed as a mixture. Ester **SI-52**: R<sub>f</sub> 0.55 (9:1 Hexanes:EtOAc); <sup>1</sup>H NMR (500 MHz, CDCl<sub>3</sub>): Major (*E*)-isomer **SI-52** δ 7.71 (dd, *J* = 7.7, 1.5, 1H), 7.40 (dt, *J* = 7.8, 1.6, 1H), 7.30 (dd, *J* = 8.0, 1.24, 1H), 7.22 (dt, *J* = 7.7, 1.6, 1H), 5.38 (tq, *J* = 6.7, 1.6, 1H), 4.23 (q, *J* = 7.1, 1H), 3.88 (s, 3H), 1.63 (dt, *J* = 6.8, 1.2, 3H), 1.45 (br s, 3H), 1.33 (d, *J* = 7.0, 3H); Minor (*Z*)-isomer **SI-52** δ 7.60 (dd, *J* = 7.8, 1.3, 1H), 7.45–7.38 (m, 2H), 7.23 (dt, *J* = 7.6, 1.7, 1H), 5.25 (tq, *J* = 6.9, 0.8, 1H), 4.78 (q, *J* = 7.2, 1H), 3.84 (s, 3H), 1.61 (q, *J* = 1.5, 3H), 1.40 (quint, *J* = 1.5, 3H), 1.35 (d, *J* = 7.3, 3H); <sup>13</sup>C NMR (125 MHz, CDCl<sub>3</sub>): (27 of 28 signals observed) δ 169.4, 169.1, 146.9, 145.1, 139.3, 138.9, 131.7, 131.6, 131.1, 130.9, 129.8, 129.4, 127.8, 127.6, 125.8, 120.3, 118.3, 52.3, 52.1, 42.7, 35.3, 20.3, 20.2, 18.3, 16.0, 13.6, 13.3;



IR (film): 2968, 1721, 1601, 1576, 1485, 1446, 1371  $\text{cm}^{-1}$ ; HRMS–APCI ( $m/z$ )  $[\text{M} + \text{H}]^+$  calcd for  $\text{C}_{14}\text{H}_{19}\text{O}_2^+$ , 219.13796; found 219.13794.

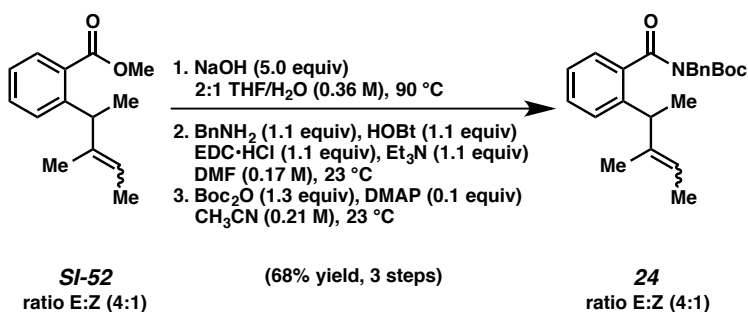

**Imide 24.** To a solution of ester **SI-52** (1.61 g, 7.40 mmol, 1.0 equiv) in THF (35 mL) was added a solution of NaOH (1.48 g, 37.0 mmol, 5.0 equiv) in  $\text{H}_2\text{O}$  (35 mL). The reaction was heated to 90 °C and stirred for 12 h. After cooling to room temperature, the reaction mixture was poured into deionized water (25 mL) and diluted with EtOAc (25 mL). The layers were separated and the aqueous layer was acidified to pH ~2 with 1 N HCl (100 mL) and extracted with EtOAc (3 x 50 mL). The organic layers were combined, washed with deionized water (300 mL), dried over  $\text{MgSO}_4$ , and concentrated under reduced pressure to afford the corresponding carboxylic acid, which was used in the subsequent step without further purification.

To a solution of the crude carboxylic acid, HOBt (1.08 g, 7.80 mmol, 1.1 equiv from **SI-52**), and EDC·HCl (1.53 g, 7.80 mmol, 1.1 equiv from **SI-52**) in DMF (40 mL) was added benzylamine (0.90 mL, 7.80 mmol, 1.1 equiv from **SI-52**) and triethylamine (1.17 mL, 7.80 mmol, 1.1 equiv from **SI-52**). After stirring for 15 h, the reaction mixture was poured into deionized water (300 mL) and diluted with EtOAc (50 mL). The layers were separated and the aqueous layer was extracted with EtOAc (3 x 50 mL). The organic layers were combined, washed with deionized water (100 mL), dried over  $\text{MgSO}_4$ , and concentrated under reduced pressure to afford the corresponding amide, which was used in the subsequent step without further purification.

To a solution of the crude amide in  $\text{CH}_3\text{CN}$  (45 mL) was added DMAP (82 mg, 0.65 mmol, 0.1 equiv) and  $\text{Boc}_2\text{O}$  (1.85 g, 8.50 mmol, 1.3 equiv from **SI-52**). After stirring for 15 h, the reaction mixture was concentrated under reduced pressure and purified by flash chromatography (99:1 Hexanes:EtOAc) to yield imide **24** (1.97 g, 68% yield, 3 steps) as an inseparable mixture of olefin isomers and as a colorless oil (4:1 mixture of alkene isomers).

Configurational isomers of imide **24** were analyzed as a mixture. Imide **24**:  $R_f$  0.52 (9:1 Hexanes:EtOAc);  $^1\text{H}$  NMR (500 MHz,  $\text{CDCl}_3$ ): Major (*E*)-isomer **24**  $\delta$  7.43 (d,  $J = 7.5$ , 2H), 7.37–7.31 (m, 3H), 7.29–7.22 (m, 2H), 7.16 (dt,  $J = 7.7$ , 1.4, 1H), 7.12–7.08 (m, 1H), 5.36 (tq,  $J = 6.8$ , 1.3, 1H), 5.06 (s, 2H), 3.67 (q,  $J = 6.9$ , 1H), 1.60 (d,  $J = 6.7$ , 3H), 1.48 (s, 3H), 1.30 (d,  $J = 7.0$ , 3H), 1.13 (s, 9H); Minor (*E*)-isomer **24**  $\delta$  7.45–7.37 (m, 2H), 7.37–7.31 (m, 3H), 7.29–7.22 (m, 2H), 7.18 (dt,  $J = 7.5$ , 1.3, 1H), 7.12–7.08 (m, 1H), 5.22 (br s, 1H), 4.99 (br s, 2H), 4.34 (br s, 1H), 1.57 (d,  $J = 6.9$ , 3H), 1.53 (t,  $J = 1.4$ , 3H), 1.34 (d,  $J = 7.2$ , 3H), 1.11 (s, 9H);  $^{13}\text{C}$  NMR (125 MHz,  $\text{CDCl}_3$ ):  $\delta$  172.4, 152.8, 142.8, 141.3, 138.9, 138.6, 138.1, 138.04, 138.02, 129.4, 129.0, 128.5, 128.3, 127.5, 127.4, 126.3, 126.2, 125.4, 120.0, 118.6, 83.5, 48.0, 43.2, 27.7, 27.6, 20.2, 18.7, 15.5, 13.5, 13.3; IR (film): 2973, 1728, 1670, 1456, 1369, 1335, 1228  $\text{cm}^{-1}$ ; HRMS–APCI ( $m/z$ )  $[\text{M} + \text{H}]^+$  calcd for  $\text{C}_{25}\text{H}_{32}\text{NO}_3^+$ , 394.23767; found 394.23814.

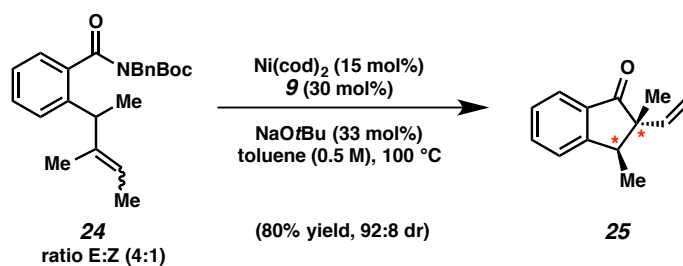

**Indanone 25 (Figure 3).** Following the representative procedure described in Section C, purification by preparative thin-layer chromatography (98:2 Benzene: $\text{CH}_3\text{CN}$ ) afforded indanone **25** (80% yield, 92:8 dr, average of two experiments) as a colorless oil. Indanone **25**:  $R_f$  0.48 (9:1 Hexane:EtOAc);  $^1\text{H}$  NMR (500 MHz,  $\text{CDCl}_3$ ):  $\delta$  7.75 (d,  $J = 7.7$ , 1H), 7.62 (dt,  $J = 7.7$ , 1.2, 1H), 7.49 (dd,  $J = 7.8$ , 0.9, 1H), 7.38 (tt,  $J = 7.5$ , 0.9, 1H), 5.94 (dd,  $J = 17.4$ , 10.6, 1H), 5.23–5.15 (m, 2H), 3.40 (q,  $J = 7.5$ , 1H), 1.32 (d,  $J = 7.4$ , 3H), 1.19 (s, 3H);  $^{13}\text{C}$  NMR (125 MHz,  $\text{CDCl}_3$ ):  $\delta$  208.4, 157.2, 141.0, 135.1, 134.5, 127.8, 125.1, 124.5, 114.6, 56.2, 43.1, 18.5, 15.1; IR (film): 2972, 1712, 1606, 1466, 1328, 1285, 1226  $\text{cm}^{-1}$ ; HRMS–APCI ( $m/z$ )  $[\text{M} + \text{H}]^+$  calcd for  $\text{C}_{13}\text{H}_{15}\text{O}^+$ , 187.11174; found 187.11180.

*The stereochemistry of indanone 25 was verified by NOESY (500 MHz,  $\text{CDCl}_3$ ), as the following correlation was observed:*

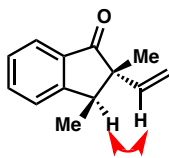

## References

- <sup>1</sup> Cui, X.; Wang, S.; Zhang, Y.; Deng, W.; Qian, Q.; Gong, H. *Org. Biomol. Chem.* **2013**, *11*, 3094–3097.
- <sup>2</sup> Hansen, E. C.; Pedro, D. J.; Wotal, A. C.; Gower, N. J.; Nelson, J. D.; Caron, S.; Weix, D. J. *Nat. Chem.* **2016**, *8*, 1226–1230.
- <sup>3</sup> Querolle, O.; Dubois, J.; Thoret, S.; Roussi, F.; Guéritte, F.; Guénard, D. *J. Med. Chem.* **2004**, *47*, 5937–5944.
- <sup>4</sup> Clennan, E. L.; Chen, X. *J. Am. Chem. Soc.* **1989**, *111*, 5787–5792.
- <sup>5</sup> Tanaka, K.; Uneme, H.; Ono, N.; Kaji, A. *Chem. Lett.* **1979**, *9*, 1039–1040.
- <sup>6</sup> Friese, A.; Hell-Momeni, K.; Zundorf, I.; Winckler, T.; Dingermann, T.; Dannhardt, G. *J. Med. Chem.* **2002**, *45*, 1535–1542.
- <sup>7</sup> Shimano, M.; Kamei, N.; Tanaka, T.; Harada, T.; Haino, M.; Okuyama, A.; Arakawa, Y. Murakami, Y. Reverse Hydroxamic Acid Derivatives. Eur. Pat. Appl. 1431285. June 23<sup>rd</sup>, 2004.
- <sup>8</sup> Sato, K.; Sugimoto, H.; Rikimaru, K.; Imoto, H.; Kamaura, M.; Negoro, N.; Tsujihata, Y.; Miyashita, H.; Odani, T.; Murata, T. *Bioorg. Med. Chem.* **2014**, *22*, 1649–1666.
- <sup>9</sup> (a) Mori, M.; Kaneta, N.; Isono, N.; Shibasaki, M. *J. Organomet. Chem.* **1993**, *455*, 255–260.  
(b) Kotha, S.; Mandal, K.; Tiwari, A.; Mobin, S. M. *Chem. Eur. J.* **2006**, *12*, 8024–8038.
- <sup>10</sup> Hayashi, T.; Tang, J.; Kato, K. *Org. Lett.* **1999**, *1*, 1487–1489.
- <sup>11</sup> Van Zyl, C. M.; McKeeby, J. L.; Van Dort, P. C.; Larson, E. J.; Silver, M. E. *Inorg. Chim. Acta.* **1987**, *133*, 289–294.

**<sup>1</sup>H NMR Spectra:**

Current Data Parameters  
 NAME JM-5-073  
 EXPNO 1  
 PROCNO 1

F2 - Acquisition Parameters  
 Date\_ 20170217  
 Time\_ 18.24 h  
 INSTRUM av500  
 PROBHD Z119248\_0002 ( )  
 PULPROG zg30  
 TD 65536  
 SOLVENT CDCl3  
 NS 8  
 DS 0  
 SWH 10000.000 Hz  
 FIDRES 0.305176 Hz  
 AQ 3.2767999 sec  
 RG 12.14  
 DW 50.000 usec  
 DE 10.00 usec  
 TE 298.0 K  
 D1 2.00000000 sec  
 TD0 1  
 SFO1 500.1330008 MHz  
 NUC1 <sup>1</sup>H  
 P1 10.00 usec  
 PLW1 13.50000000 W

F2 - Processing parameters  
 SI 65536  
 SF 500.1300120 MHz  
 WDW EM  
 SSB 0  
 LB 0  
 GB 0  
 PC 1.00

1.763  
1.717  
1.715  
1.573  
1.571  
1.569

3.889  
3.776

7.844  
7.841  
7.828  
7.826  
7.421  
7.418  
7.406  
7.403  
7.391  
7.388  
7.247  
7.246  
7.245  
7.230  
7.217  
7.216  
7.215  
7.206  
7.205  
7.190  
7.189

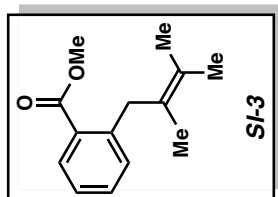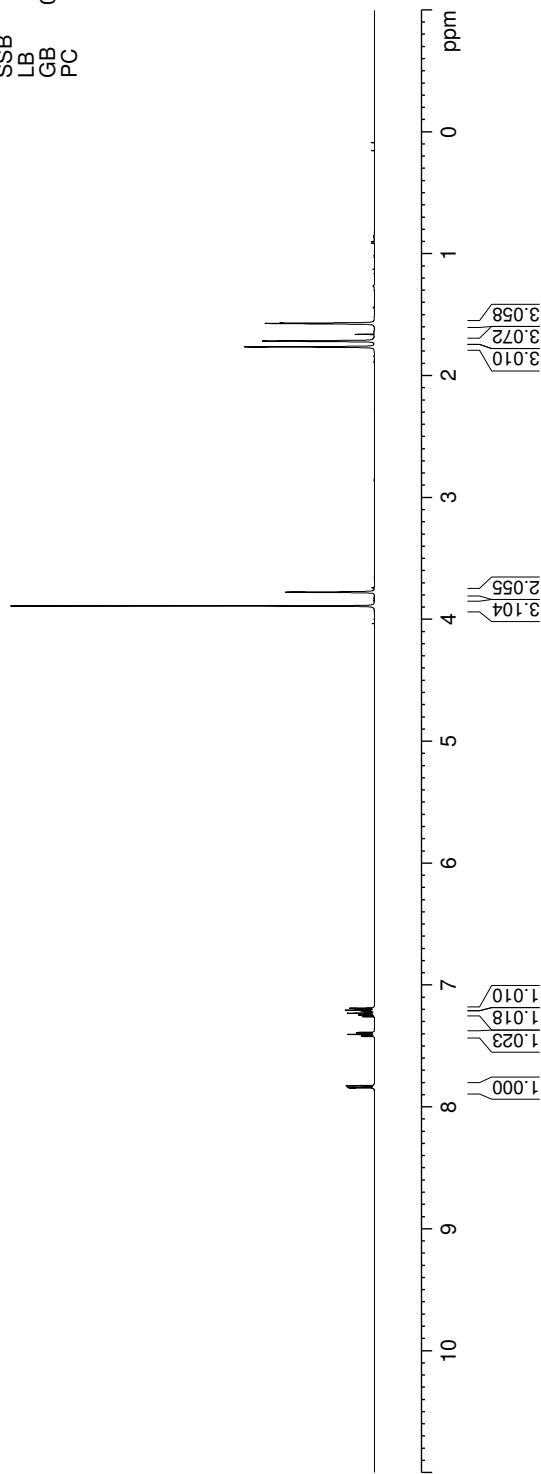

Current Data Parameters  
 NAME JM-5-022  
 EXPNO 1  
 PROCNO 1

F2 - Acquisition Parameters  
 Date 20170112  
 Time 10.47  
 INSTRUM drx500  
 PROBHD 5 mm bb-Z800  
 PULPROG zg30  
 TD 65536  
 SOLVENT CDCl3  
 NS 8  
 DS 0  
 SWH 10000.000 Hz  
 FIDRES 0.152588 Hz  
 AQ 3.2767999 sec  
 RG 181  
 DW 50.000 usec  
 DE 6.00 usec  
 TE 297.1 K  
 D1 2.0000000 sec  
 TD0 1

===== CHANNEL f1 =====  
 NUC1 1H  
 P1 13.30 usec  
 PL1 0 dB  
 SFO1 500.3330020 MHz

F2 - Processing parameters  
 SI 32768  
 SF 500.3300220 MHz  
 WDW EM  
 SSB 0  
 LB 0  
 GB 0  
 PC 1.00

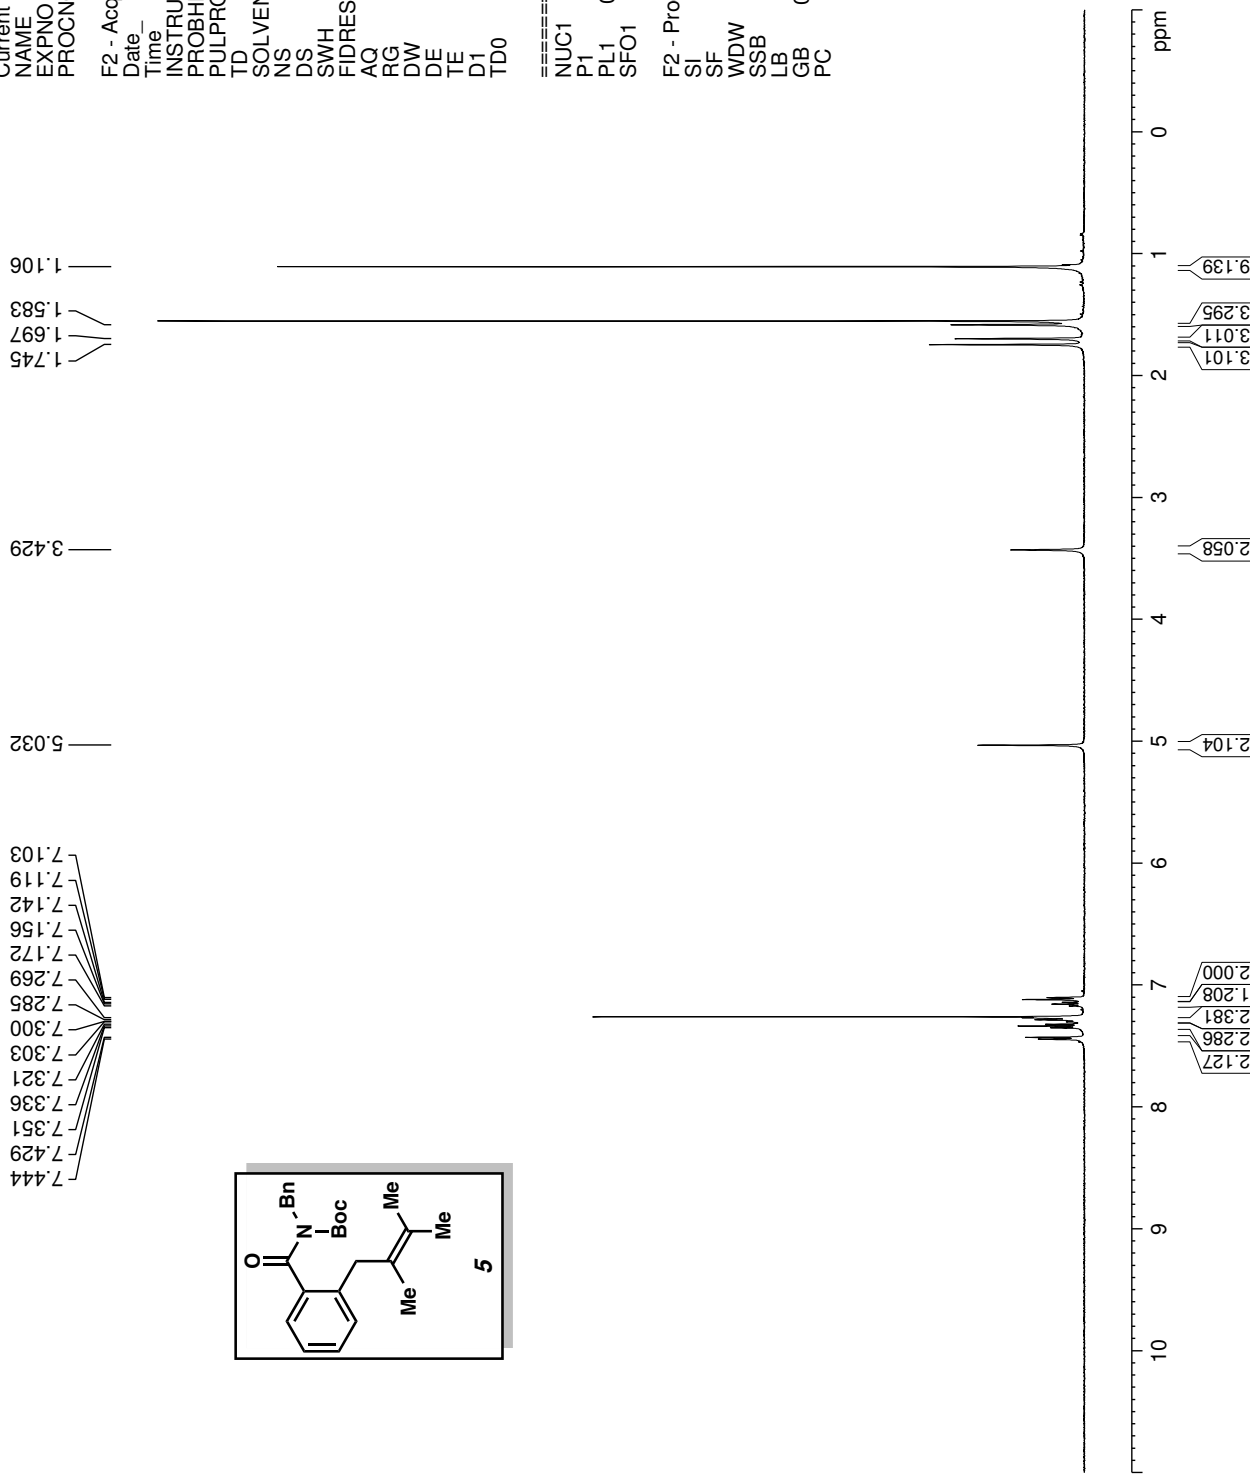

Current Data Parameters  
 NAME JM-4-296  
 EXPNO 100  
 PROCNO 1

F2 - Acquisition Parameters  
 Date\_ 20170115  
 Time\_ 17.12 h  
 INSTRUM av500  
 PROBHD Z119248\_0002 ( )  
 PULPROG zg30  
 TD 65536  
 SOLVENT CDCl3  
 NS 8  
 DS 0  
 SWH 10000.000 Hz  
 FIDRES 0.305176 Hz  
 AQ 3.2767999 sec  
 RG 12.14  
 DW 50.000 usec  
 DE 10.00 usec  
 TE 298.0 K  
 D1 2.00000000 sec  
 TD0 1  
 SFO1 500.1330008 MHz  
 NUC1 1H  
 P1 10.00 usec  
 PLW1 13.50000000 W

F2 - Processing parameters  
 SI 65536  
 SF 500.1300146 MHz  
 WDW EM  
 SSB 0  
 LB 0  
 GB 0  
 PC 1.00

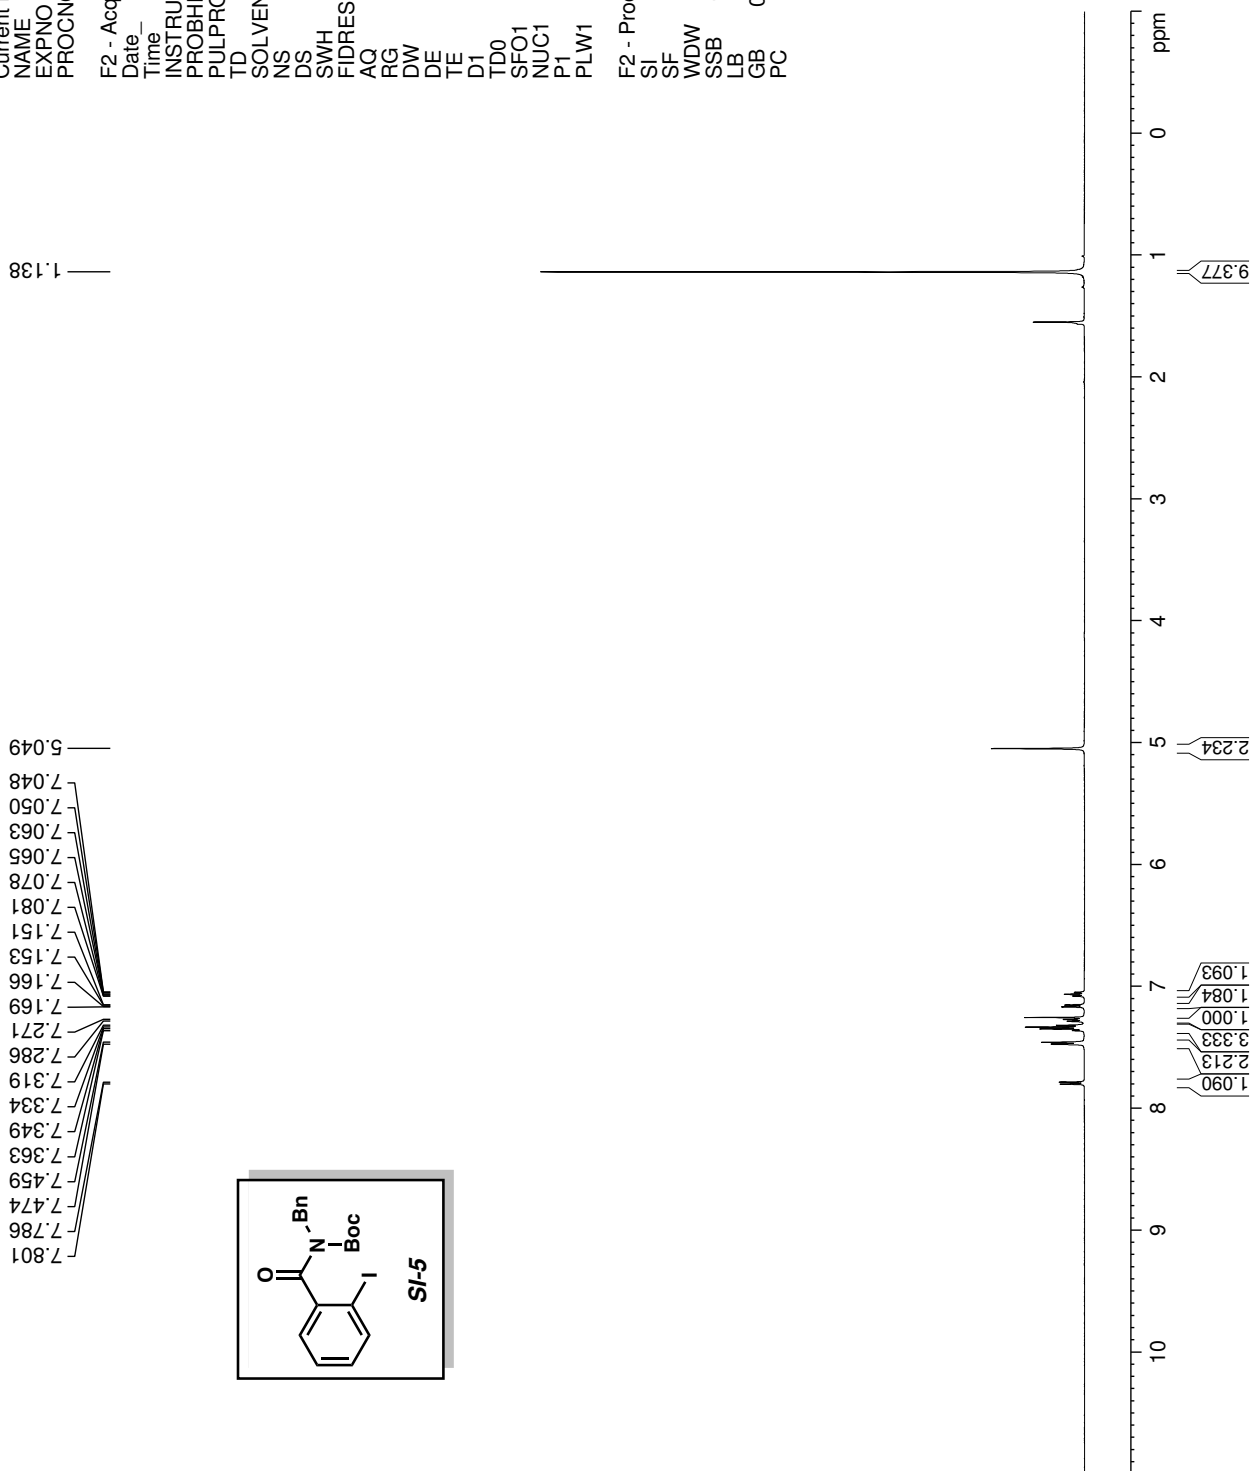

Current Data Parameters  
 NAME JM-5-054  
 EXPNO 1  
 PROCNO 1

F2 - Acquisition Parameters  
 Date 20170217  
 Time 18.30 h  
 INSTRUM av500  
 PROBHD Z119248\_0002 ( )  
 PULPROG zg30  
 TD 65536  
 SOLVENT CDCl3  
 NS 8  
 DS 0  
 SWH 10000.000 Hz  
 FIDRES 0.305176 Hz  
 AQ 3.2767999 sec  
 RG 23.34  
 DW 50.000 usec  
 DE 10.00 usec  
 TE 298.0 K  
 D1 2.00000000 sec  
 TD0 1  
 SFO1 500.1330008 MHz  
 NUC1 <sup>1</sup>H  
 P1 10.00 usec  
 PLW1 13.50000000 W

F2 - Processing parameters  
 SI 65536  
 SF 500.1300121 MHz  
 WDW EM  
 SSB 0  
 LB 0  
 GB 0  
 PC 1.00

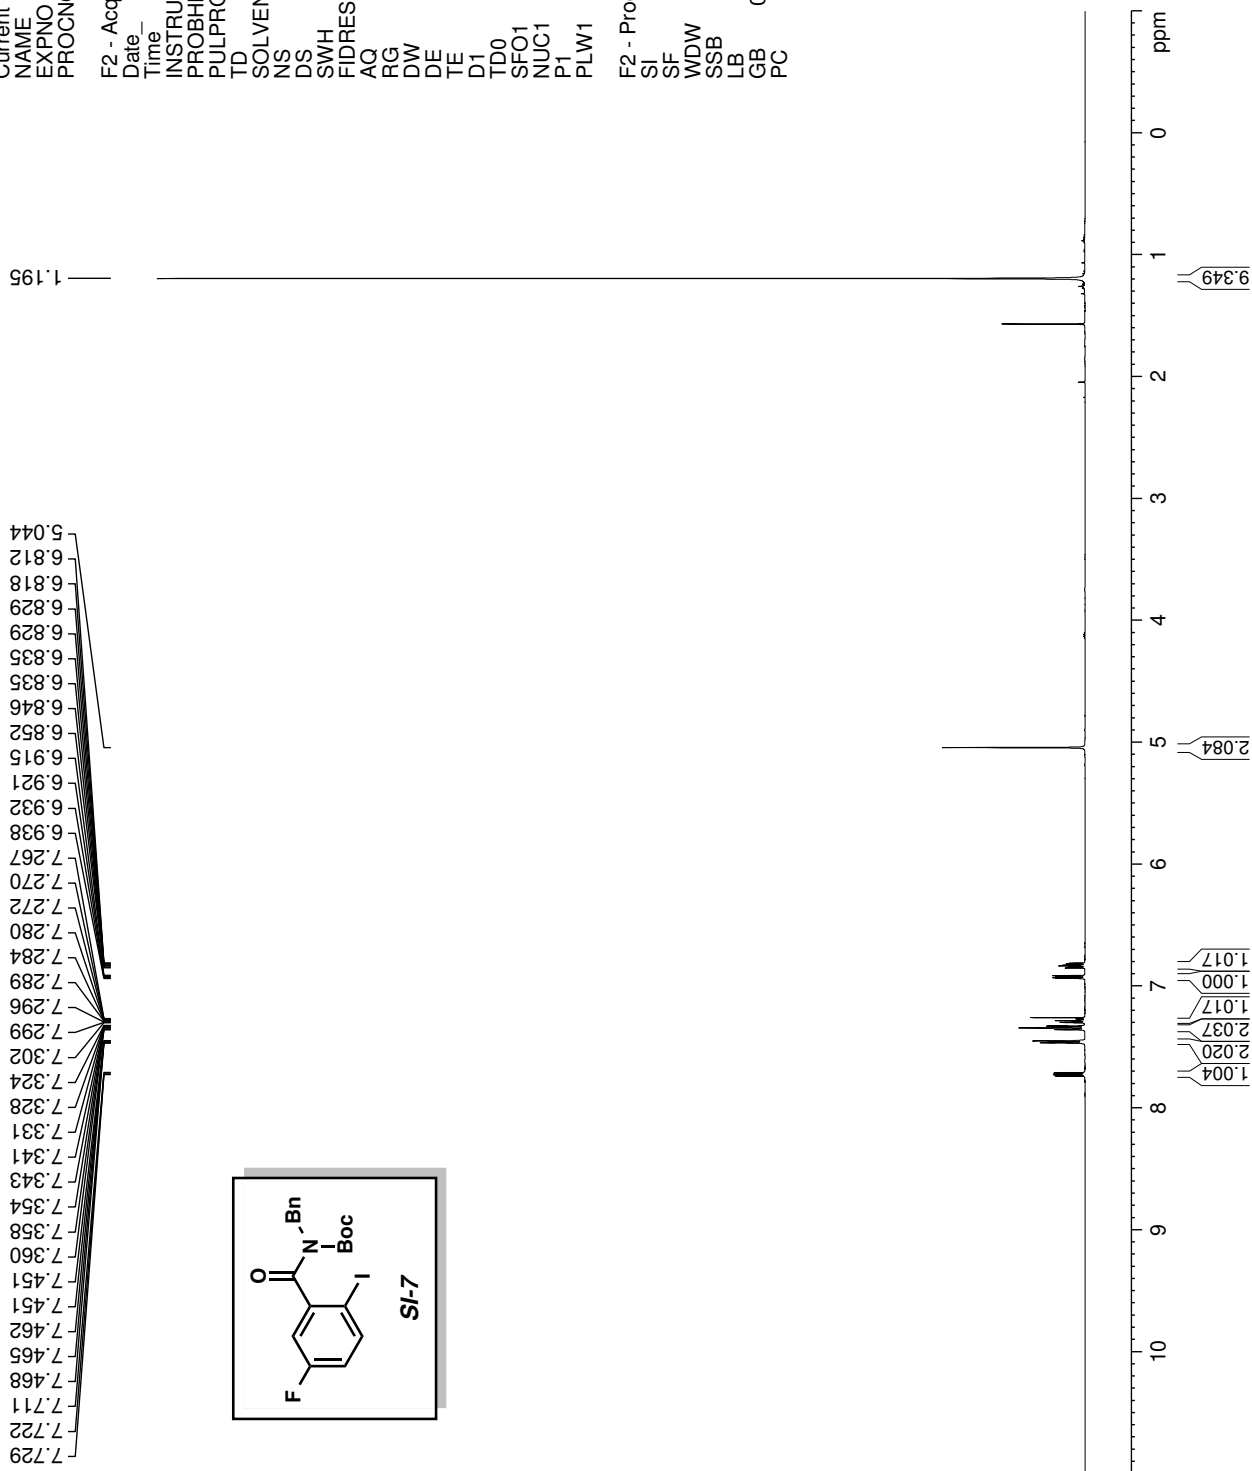



Current Data Parameters  
 NAME JM-5-037  
 EXPNO 100  
 PROCNO 1

F2 - Acquisition Parameters  
 Date 20170130  
 Time 18.16 h  
 INSTRUM av500  
 PROBHD Z119248\_0002 ( )  
 PULPROG zg30  
 TD 65536  
 SOLVENT CDCl3  
 NS 8  
 DS 0  
 SWH 10000.000 Hz  
 FIDRES 0.305176 Hz  
 AQ 3.2767999 sec  
 RG 12.14  
 DW 50.000 usec  
 DE 10.00 usec  
 TE 298.0 K  
 D1 2.00000000 sec  
 TD0 1  
 SFO1 500.1330008 MHz  
 NUC1 <sup>1</sup>H  
 P1 10.00 usec  
 PLW1 13.50000000 W

F2 - Processing parameters  
 SI 65536  
 SF 500.1300121 MHz  
 WDW EM  
 SSB 0  
 LB 0.30 Hz  
 GB 0  
 PC 1.00

7.945  
7.928  
7.485  
7.483  
7.468  
7.413  
7.409  
7.370  
7.368  
7.365  
7.354  
7.351  
7.342  
7.339  
7.335  
7.323  
7.321  
7.318  
7.317  
7.312  
7.309  
7.306  
7.302  
7.300  
7.295  
7.290  
7.280  
5.068

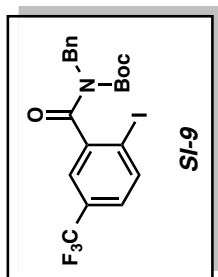

1.154

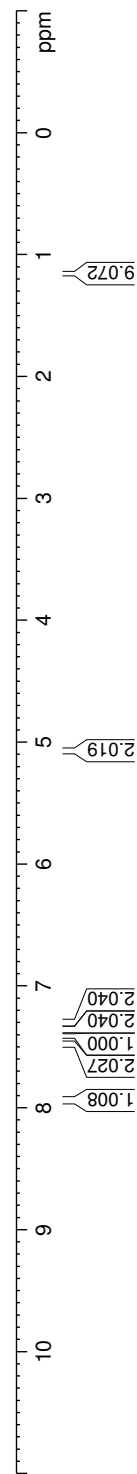

Current Data Parameters  
 NAME JM-5-033  
 EXPNO 90  
 PROCNO 1

F2 - Acquisition Parameters  
 Date\_ 20170129  
 Time\_ 16:35  
 INSTRUM av400  
 PROBHD 5 mm PABBO BB/  
 PULPROG zg30  
 TD 52882  
 SOLVENT CDCI3  
 NS 8  
 DS 0  
 SWH 8012.820 Hz  
 FIDRES 0.151523 Hz  
 AQ 3.2998369 sec  
 RG 155.85  
 DW 62.400 usec  
 DE 6.50 usec  
 TE 299.0 K  
 D1 2.00000000 sec  
 TD0 1

==== CHANNEL f1 =====  
 SFO1 400.1324008 MHz  
 NUC1 1H  
 P1 15.00 usec  
 PLW1 13.00000000 W

F2 - Processing parameters  
 SI 65536  
 SF 400.1300183 MHz  
 WDW EM  
 SSB 0  
 LB 0.30 Hz  
 GB 0  
 PC 1.00

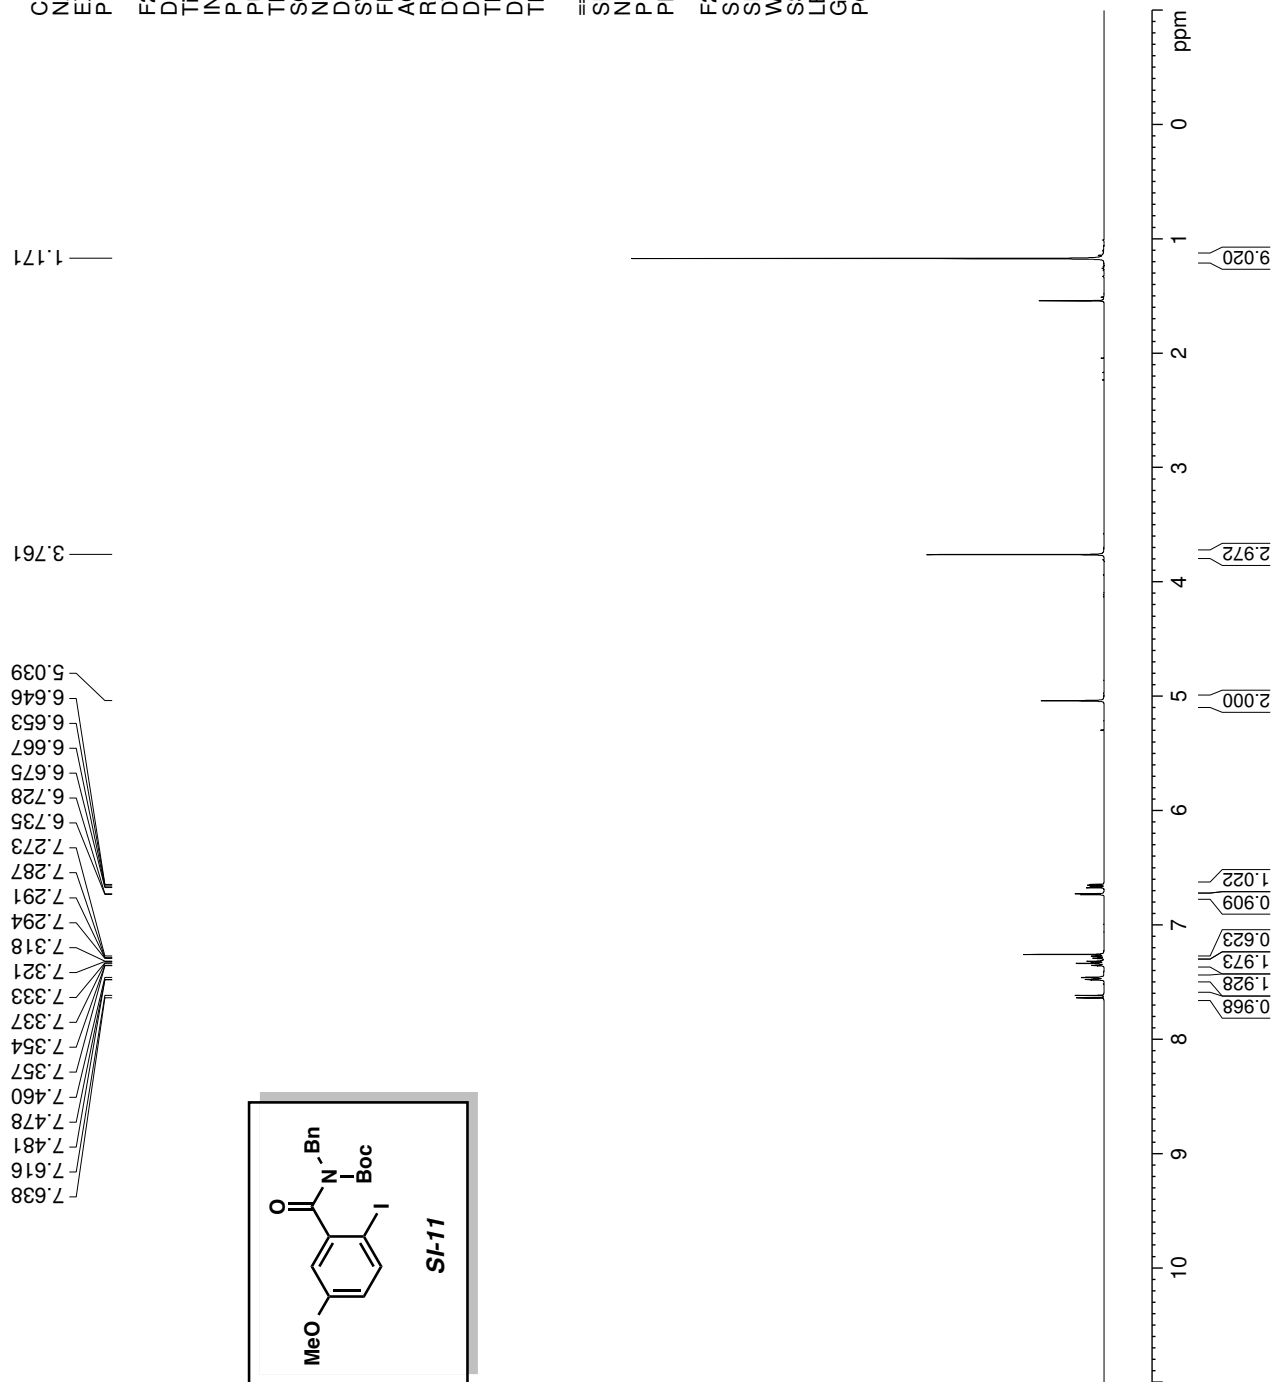

Current Data Parameters  
 NAME JMM-7-68-1  
 EXPNO 1  
 PROCNO 999

F2 - Acquisition Parameters  
 Date\_ 20170207  
 Time\_ 19.46  
 INSTRUM av500  
 PROBHD 5 mm DCH 13C-1  
 PULPROG zg30  
 TD 65536  
 SOLVENT CDCl3  
 NS 14  
 DS 0  
 SWH 10000.000 Hz  
 FIDRES 0.152588 Hz  
 AQ 3.2767999 sec  
 RG 12.14  
 DW 50.000 usec  
 DE 10.00 usec  
 TE 298.0 K  
 D1 2.00000000 sec  
 TD0 1

==== CHANNEL f1 =====  
 SFO1 500.1340010 MHz  
 NUC1 1H  
 P1 10.00 usec  
 PLW1 13.50000000 W

F2 - Processing parameters  
 SI 65536  
 SF 500.1300123 MHz  
 WDW EM  
 SSB 0  
 LB 0.30 Hz  
 GB 0  
 PC 1.00

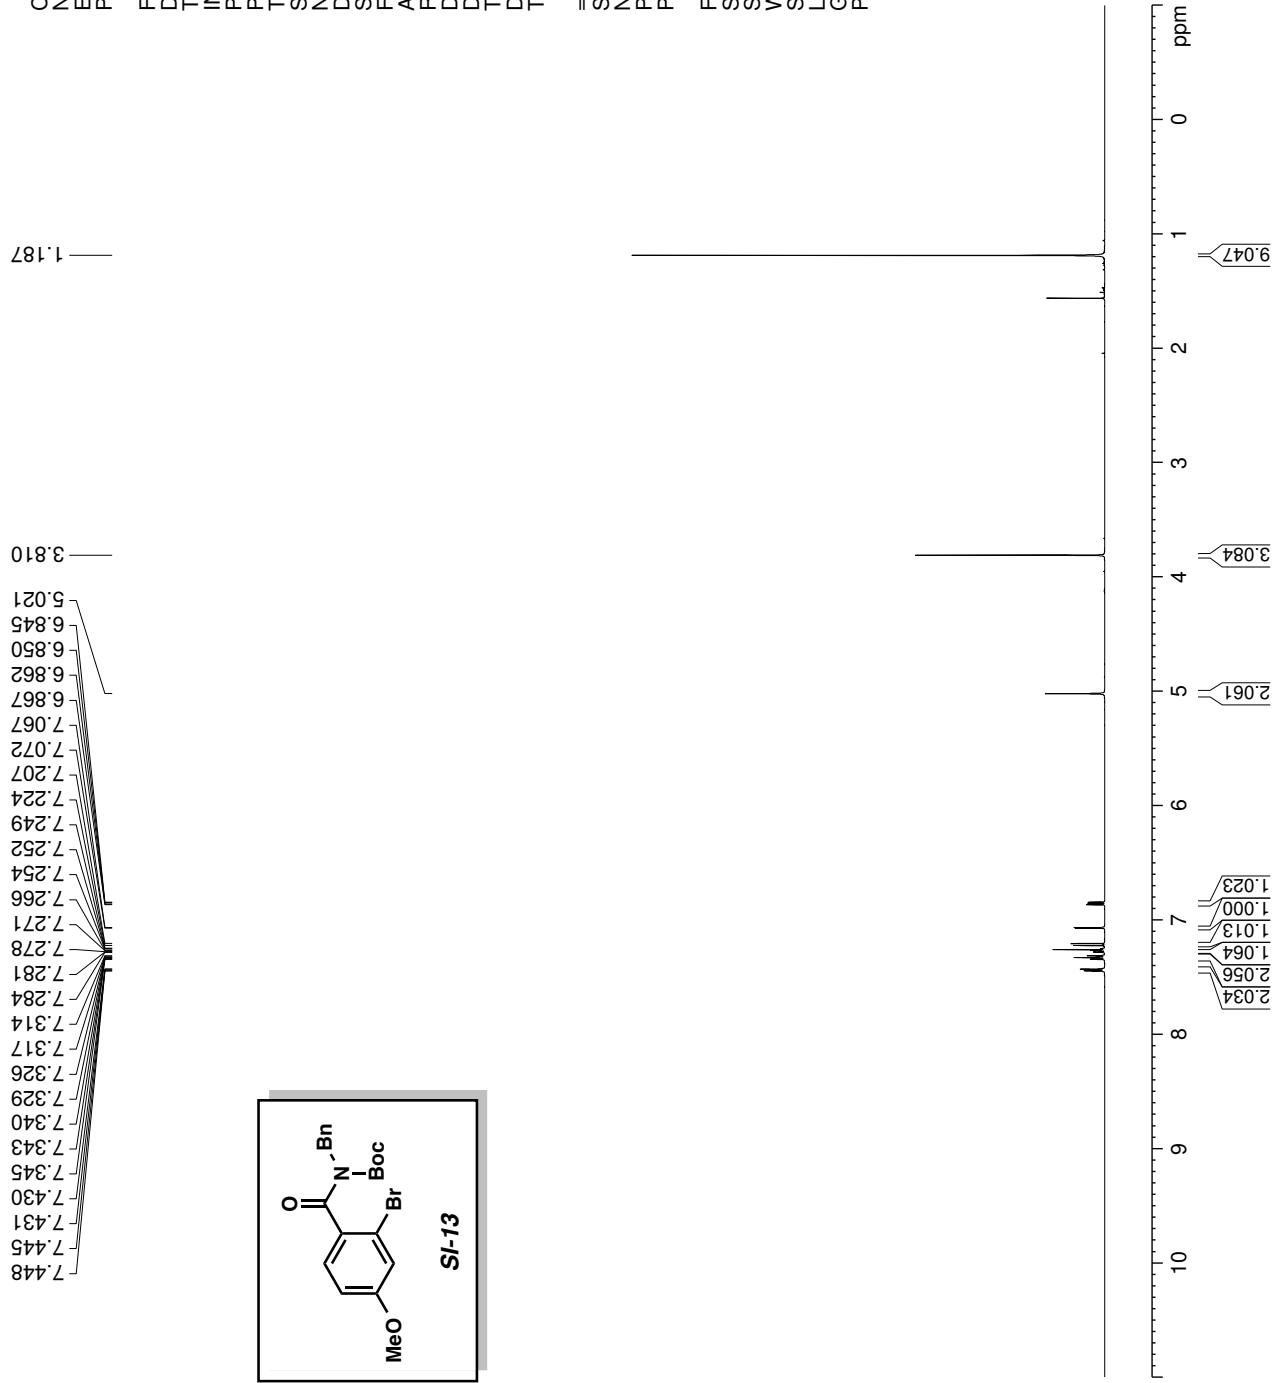



Current Data Parameters  
 NAME sr-1-088  
 EXPNO 1  
 PROCNO 1

F2 - Acquisition Parameters  
 Date\_ 20170124  
 Time\_ 9.10 h  
 INSTRUM av500  
 PROBHD Z119248\_0002 ( zq30  
 PULPROG 65536  
 TD 8  
 SOLVENT CDCI3  
 NS 0  
 DS 10000.000 Hz  
 SWH 0.305176 Hz  
 FIDRES 3.2767999 sec  
 AQ 12.14  
 RG 50.000 usec  
 DW 10.00 usec  
 DE 298.0 K  
 TE 2.00000000 sec  
 D1 1  
 TD0 500.1330008 MHz  
 SFO1 1H  
 NUC1 10.00 usec  
 PLW1 13.50000000 W

F2 - Processing parameters  
 SI 65536  
 SF 500.1300130 MHz  
 WDW EM  
 SSB 0  
 LB 0.30 Hz  
 GB 0  
 PC 1.00

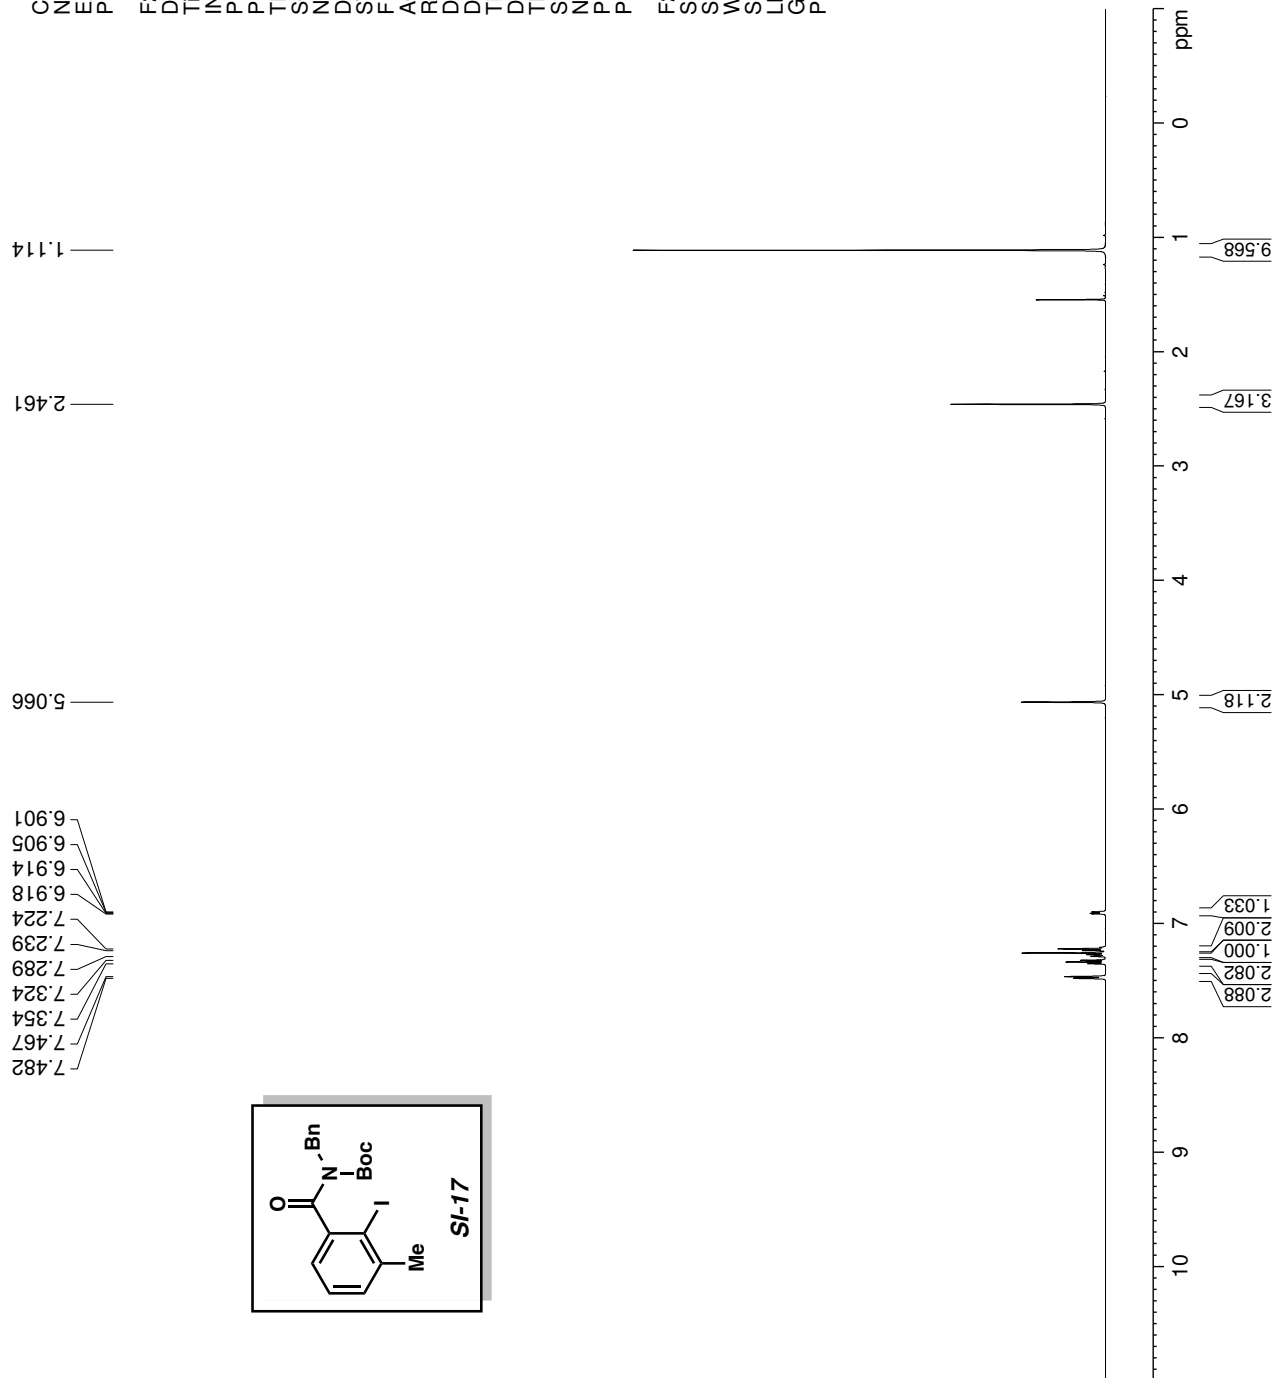

Current Data Parameters  
 NAME sr-1-035  
 EXPNO 1  
 PROCNO 1

F2 - Acquisition Parameters  
 Date\_ 20170109  
 Time\_ 17.47 h  
 INSTRUM av500  
 PROBHD Z119248\_0002 ( )  
 PULPROG zg30  
 TD 65536  
 SOLVENT CDCl3  
 NS 8  
 DS 0  
 SWH 10000.000 Hz  
 FIDRES 0.305176 Hz  
 AQ 3.2767999 sec  
 RG 7.89  
 DW 50.000 usec  
 DE 10.00 usec  
 TE 298.0 K  
 D1 2.00000000 sec  
 TD0 1  
 SFO1 500.1330008 MHz  
 NUC1 <sup>1</sup>H  
 P1 10.00 usec  
 PLW1 13.50000000 W

F2 - Processing parameters  
 SI 65536  
 SF 500.1300118 MHz  
 WDW EM  
 SSB 0  
 LB 0  
 GB 0  
 PC 1.00

1.742  
1.739  
1.690  
1.688  
1.686  
1.673

3.743

4.633

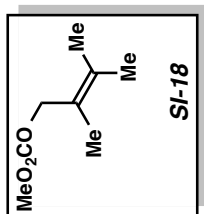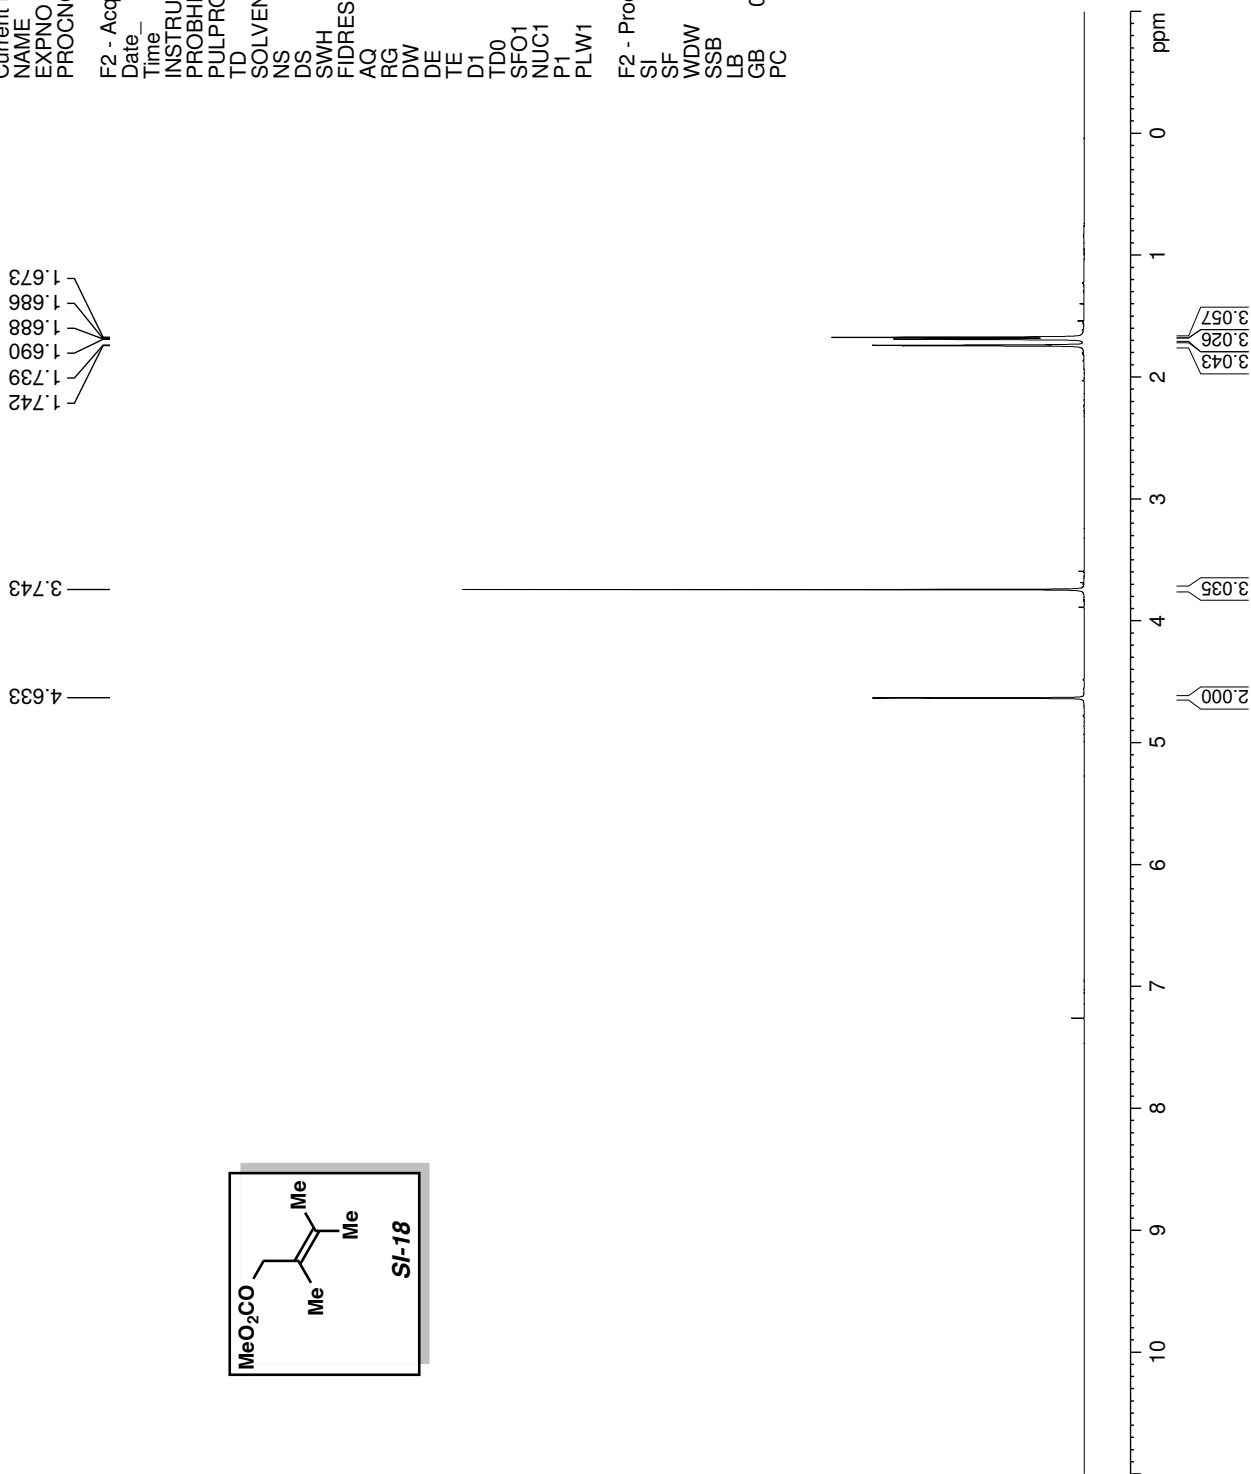

Current Data Parameters  
 NAME sr-1-065  
 EXPNO 100  
 PROCNO 1

F2 - Acquisition Parameters  
 Date\_ 20170109  
 Time\_ 17:54 h  
 INSTRUM av500  
 PROBHD Z119248\_0002 ( )  
 PULPROG zg30  
 TD 65536  
 SOLVENT CDCl3  
 NS 8  
 DS 0  
 SWH 10000.000 Hz  
 FIDRES 0.305176 Hz  
 AQ 3.2767999 sec  
 RG 19.06  
 DW 50.000 usec  
 DE 10.00 usec  
 TE 298.0 K  
 D1 2.00000000 sec  
 TD0 1  
 SFO1 500.1330008 MHz  
 NUC1 1H  
 P1 10.00 usec  
 PLW1 13.50000000 W

F2 - Processing parameters  
 SI 65536  
 SF 500.1300121 MHz  
 WDW EM  
 SSB 0  
 LB 0.30 Hz  
 GB 0  
 PC 1.00

1.665  
 1.636  
 1.622

3.772

4.509

5.607  
 5.594  
 5.580  
 5.567

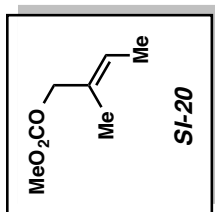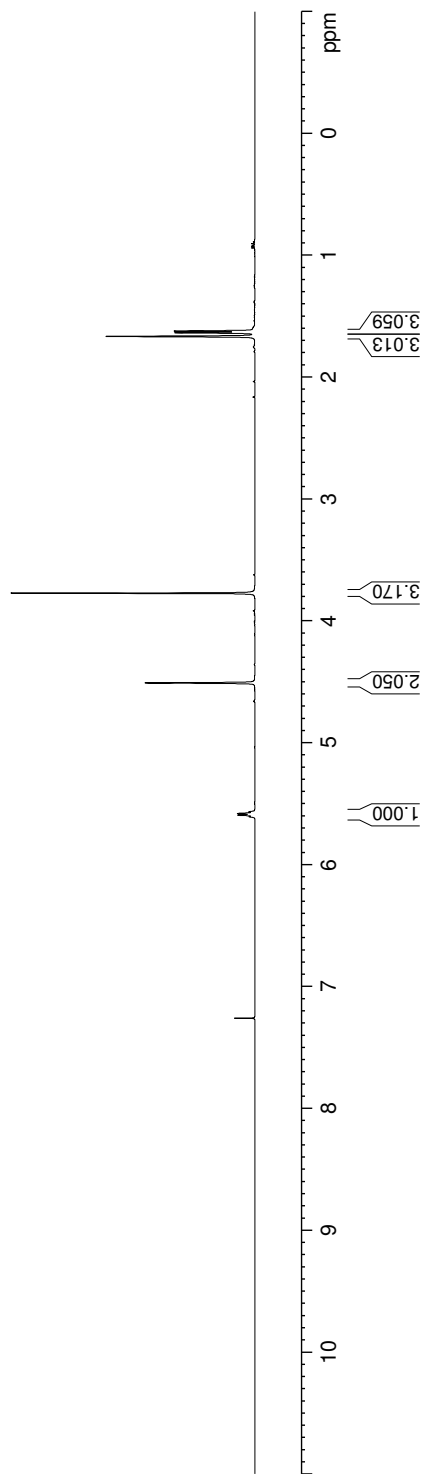

Current Data Parameters  
 NAME JMM-7-216char  
 EXPNO 1  
 PROCNO 999

F2 - Acquisition Parameters  
 Date\_ 20170108  
 Time 10:07  
 INSTRUM av500  
 PROBHD 5 mm DCH 13C-1  
 PULPROG zg30  
 TD 65536  
 SOLVENT CDCl3  
 NS 26  
 DS 0  
 SWH 10000.000 Hz  
 FIDRES 0.152588 Hz  
 AQ 3.2767999 sec  
 RG 21.37  
 DW 50.000 usec  
 DE 10.00 usec  
 TE 298.0 K  
 D1 2.0000000 sec  
 TD0 1

==== CHANNEL f1 =====  
 SFO1 500.1340010 MHz  
 NUC1 1H  
 P1 10.00 usec  
 PLW1 13.50000000 W

F2 - Processing parameters  
 SI 65536  
 SF 500.1300124 MHz  
 WDW EM  
 SSB 0  
 LB 0 0.30 Hz  
 GB 0  
 PC 1.00

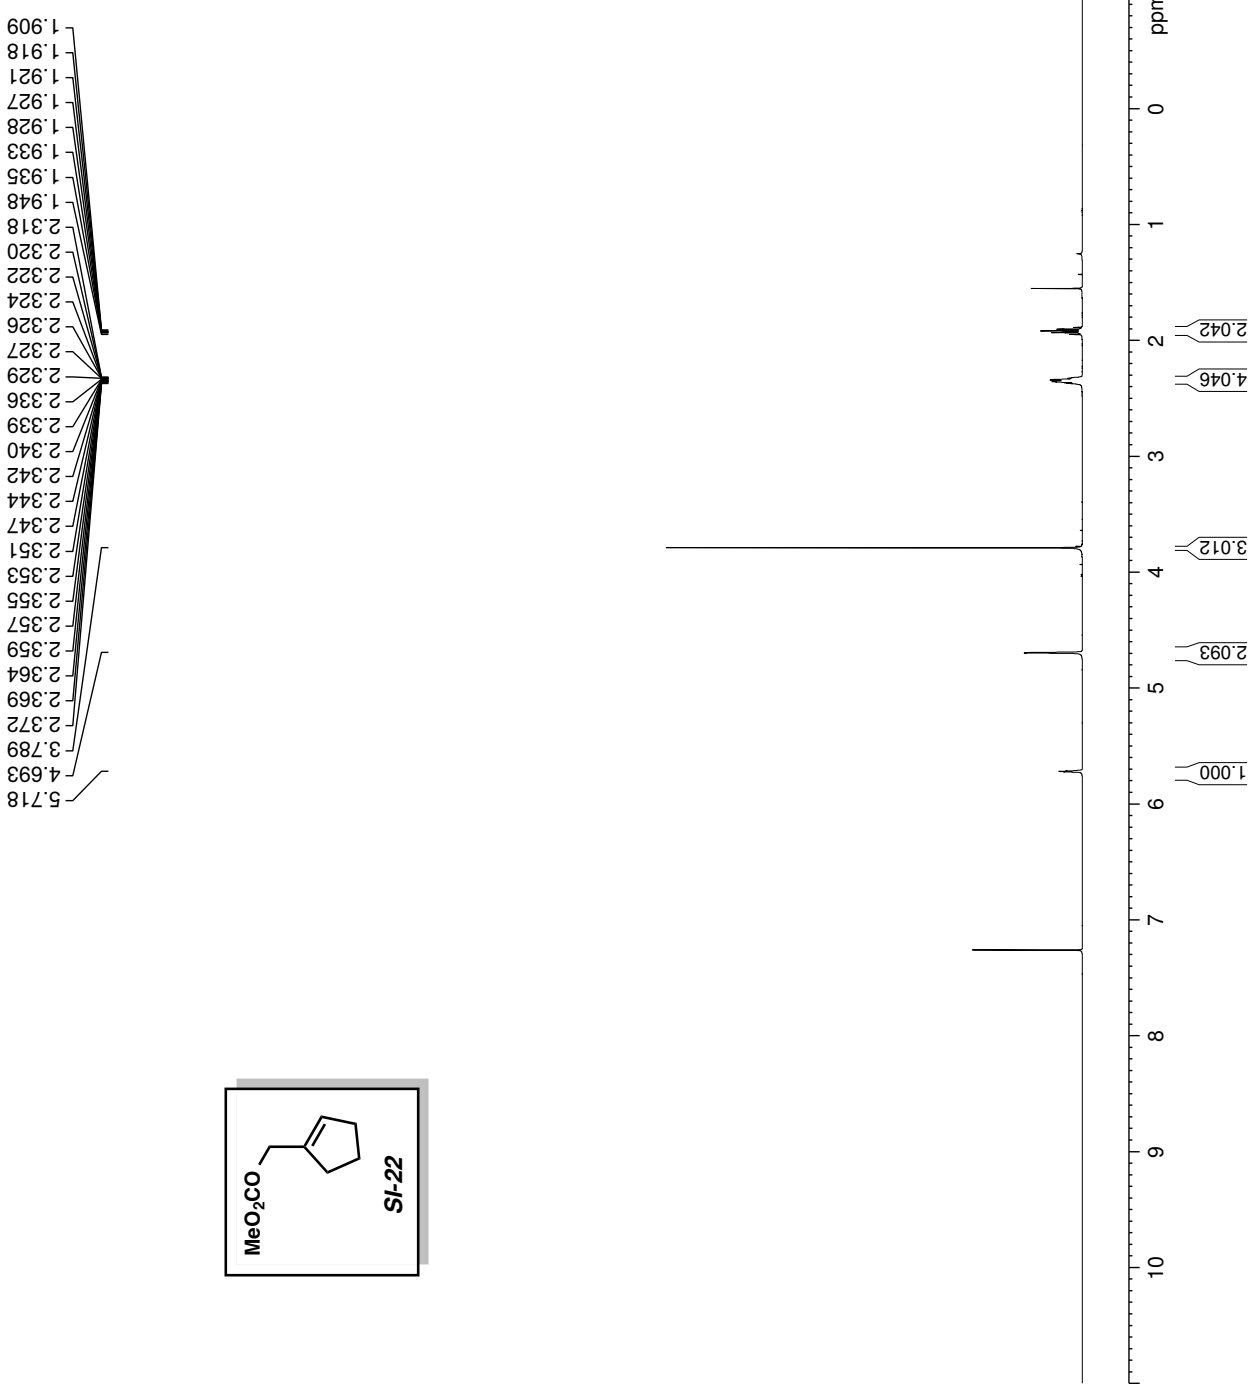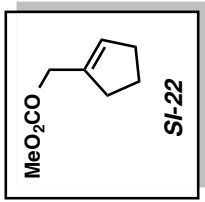



Current Data Parameters  
 NAME JM-4-293  
 EXPNO 100  
 PROCNO 1

F2 - Acquisition Parameters  
 Date\_ 20161219  
 Time\_ 18.20 h  
 INSTRUM av500  
 PROBHD Z119248\_0002 ( )  
 PULPROG zg30  
 TD 65536  
 SOLVENT CDCl3  
 NS 8  
 DS 0  
 SWH 10000.000 Hz  
 FIDRES 0.305176 Hz  
 AQ 3.2767999 sec  
 RG 12.14  
 DW 50.000 usec  
 DE 10.00 usec  
 TE 298.0 K  
 D1 2.00000000 sec  
 TD0 1  
 SFO1 500.1330008 MHz  
 NUC1 <sup>1</sup>H  
 P1 10.00 usec  
 PLW1 13.50000000 W

F2 - Processing parameters  
 SI 65536  
 SF 500.1300121 MHz  
 WDW EM  
 SSB 0  
 LB 0.30 Hz  
 GB 0  
 PC 1.00

1.600  
1.618  
1.618  
1.623  
1.627  
1.627  
1.635  
1.639  
1.639  
1.647  
1.651  
1.651  
1.658  
1.663  
1.663  
1.670  
1.670  
1.991  
1.995  
1.995  
1.996  
1.999  
1.999  
2.003  
2.003  
2.007  
2.007  
2.015  
2.019  
2.019  
2.023  
2.023  
2.026  
2.026  
2.028  
2.028  
2.031  
2.031  
2.034  
2.034  
2.036  
2.036  
2.039  
2.039  
2.041  
2.041  
2.043  
2.046  
2.046  
2.051  
2.053  
2.053  
3.778  
3.778  
4.492  
4.492  
4.493  
4.493  
5.773  
5.773  
5.776  
5.776  
5.777

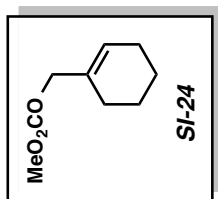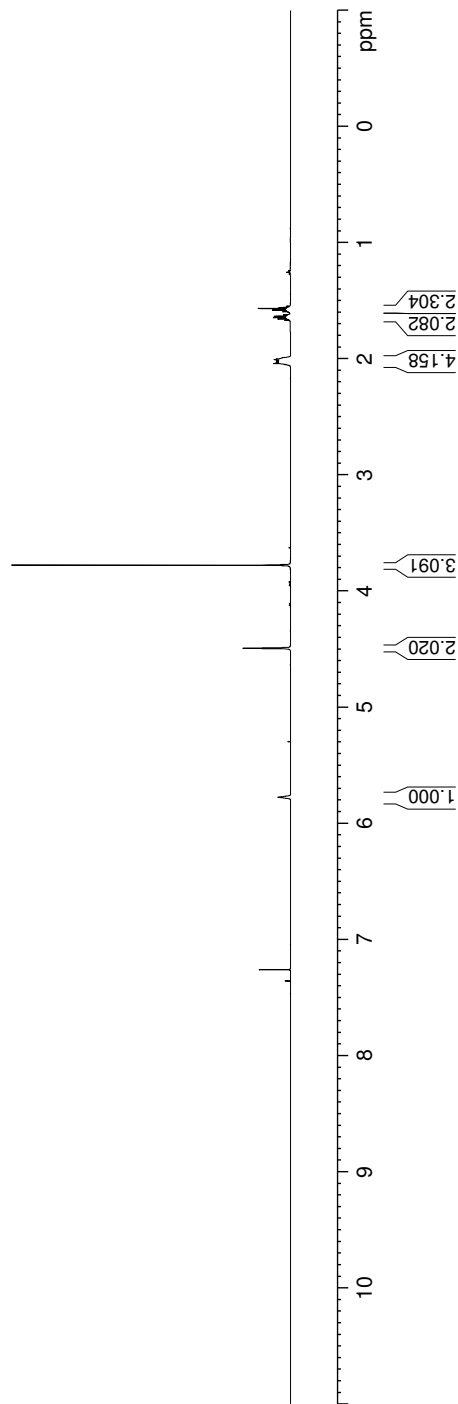

Current Data Parameters  
 NAME JMM-7-131  
 EXPNO 1  
 PROCNO 1

F2 - Acquisition Parameters  
 Date\_ 20160903  
 Time\_ 14.29  
 INSTRUM drx500  
 PROBHD 5 mm bb-Z800  
 PULPROG zg30  
 TD 65536  
 SOLVENT CDCl3  
 NS 32  
 DS 0  
 SWH 10000.000 Hz  
 FIDRES 0.152588 Hz  
 AQ 3.2767999 sec  
 RG 143.7  
 DW 50.000 usec  
 DE 6.00 usec  
 TE 297.4 K  
 D1 2.0000000 sec  
 TD0 1

==== CHANNEL f1 =====  
 NUC1 1H  
 P1 13.30 usec  
 PL1 0 dB  
 SFO1 500.3330020 MHz

F2 - Processing parameters  
 SI 32768  
 SF 500.3300221 MHz  
 WDW EM  
 SSB 0  
 LB 0.30 Hz  
 GB 0  
 PC 1.00

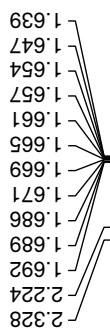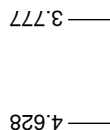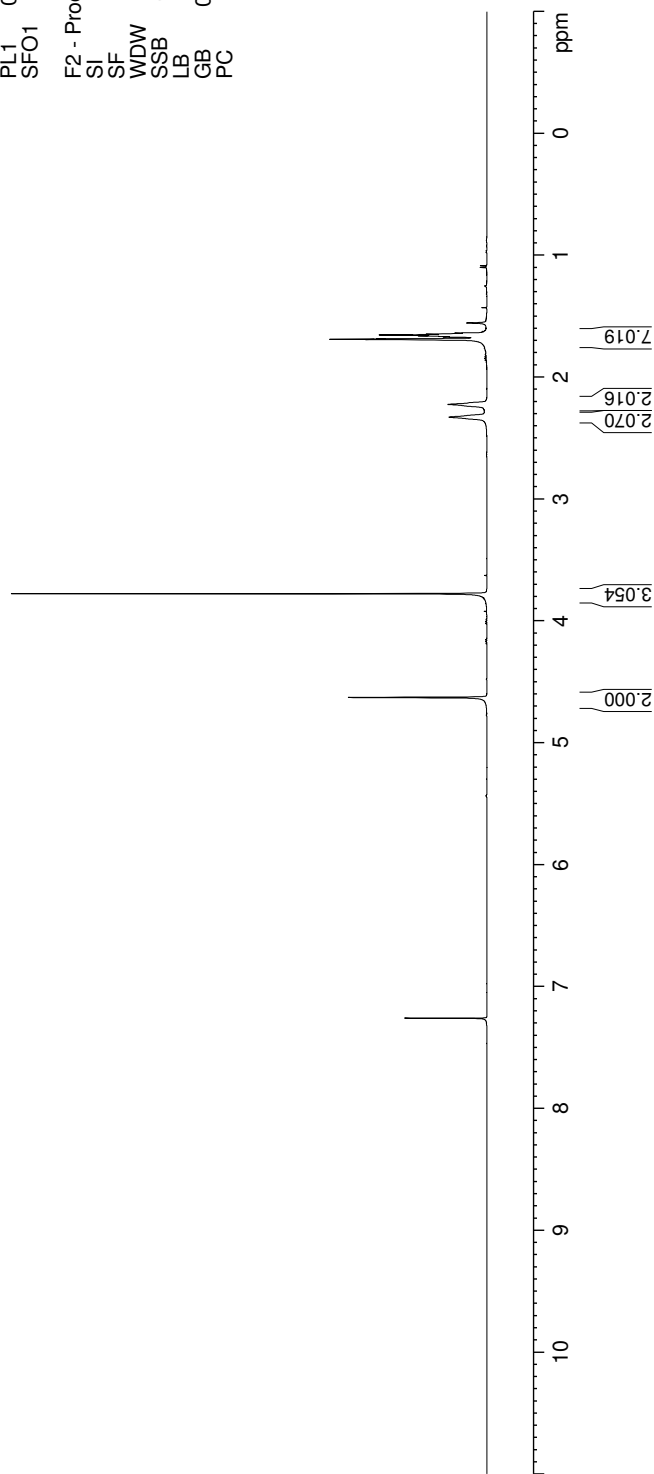

Current Data Parameters  
 NAME JMM-7-132  
 EXPNO 1  
 PROCNO 1

F2 - Acquisition Parameters  
 Date\_ 20160903  
 Time\_ 14.36  
 INSTRUM drx500  
 PROBHD 5 mm bb-Z800  
 PULPROG zg30  
 TD 65536  
 SOLVENT CDCl3  
 NS 32  
 DS 0  
 SWH 10000.000 Hz  
 FIDRES 0.152588 Hz  
 AQ 3.2767999 sec  
 RG 128  
 DW 50.000 usec  
 DE 6.00 usec  
 TE 297.4 K  
 D1 2.0000000 sec  
 TD0 1

==== CHANNEL f1 =====  
 NUC1 1H  
 P1 13.30 usec  
 PL1 0 dB  
 SFO1 500.3330020 MHz

F2 - Processing parameters  
 SI 32768  
 SF 500.3300217 MHz  
 WDW EM  
 SSB 0  
 LB 0  
 GB 0  
 PC 1.00

4.677  
 3.774  
 2.242  
 2.181  
 1.735  
 1.544

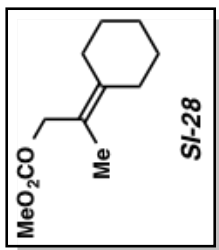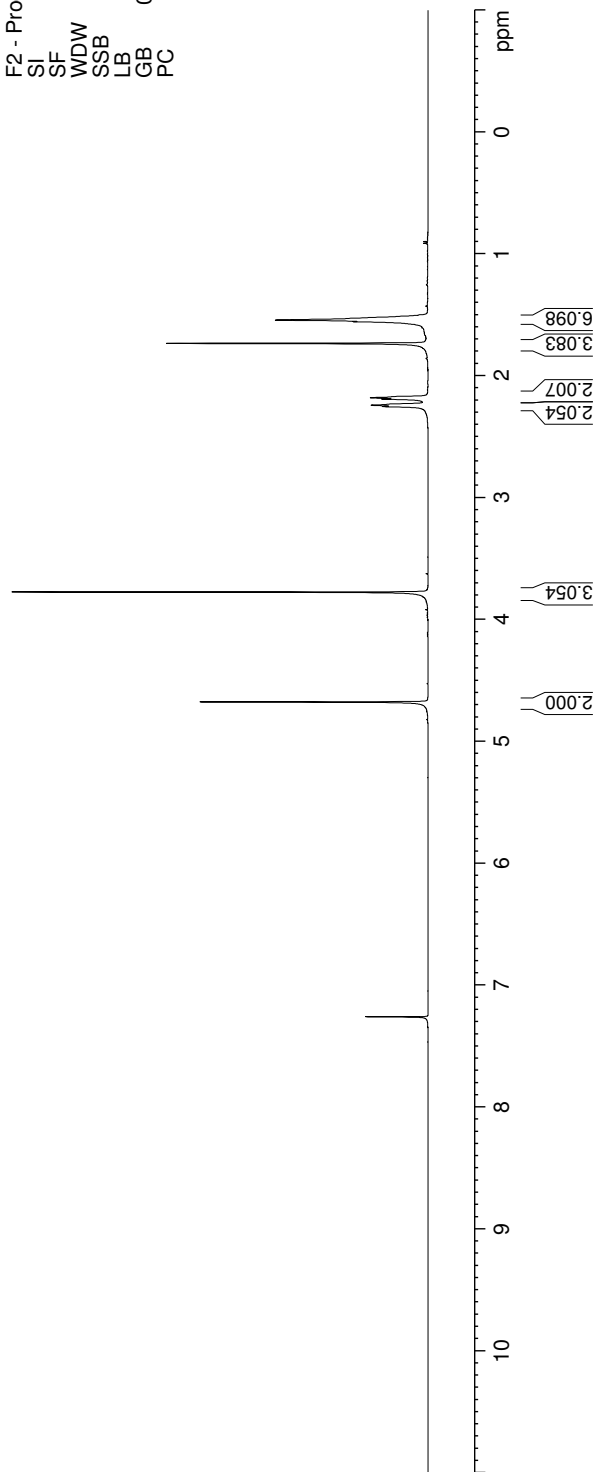

Current Data Parameters  
 NAME JMM-7-226  
 EXPNO 1  
 PROCNO 999

F2 - Acquisition Parameters  
 Date\_ 20170116  
 Time\_ 10.44  
 INSTRUM av500  
 PROBHD 5 mm DCH 13C-1  
 PULPROG zg30  
 TD 65536  
 SOLVENT MeOD  
 NS 16  
 DS 0  
 SWH 10000.000 Hz  
 FIDRES 0.152588 Hz  
 AQ 3.2767999 sec  
 RG 12.14  
 DW 50.000 usec  
 DE 10.00 usec  
 TE 298.0 K  
 D1 2.0000000 sec  
 TD0 1

==== CHANNEL f1 =====  
 SFO1 500.1340010 MHz  
 NUC1 1H  
 P1 10.00 usec  
 PLW1 13.50000000 W

F2 - Processing parameters  
 SI 65536  
 SF 500.1300121 MHz  
 WDW EM  
 SSB 0  
 LB 0  
 GB 0  
 PC 1.00

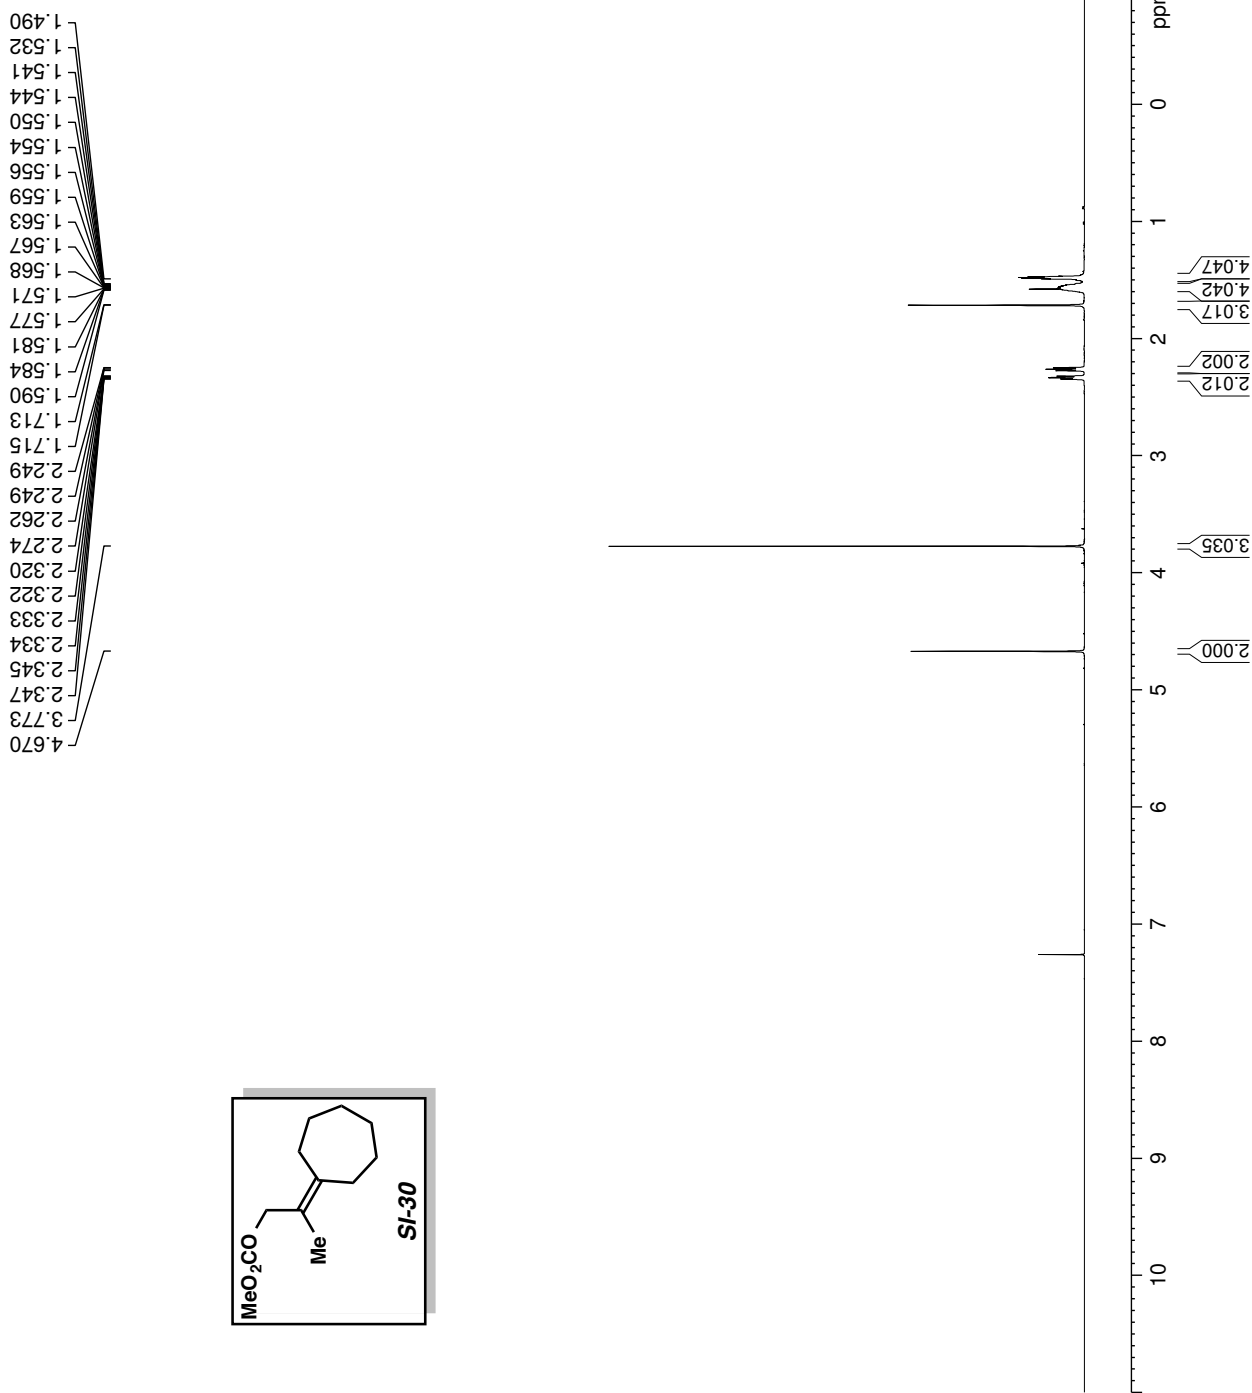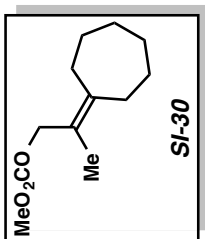

Current Data Parameters  
 NAME JM-4-281  
 EXPNO 100  
 PROCNO 1

F2 - Acquisition Parameters  
 Date\_ 20161216  
 Time\_ 10.11 h  
 INSTRUM av500  
 PROBHD Z119248\_0002 ( )  
 PULPROG zg30  
 TD 65536  
 SOLVENT CDCl3  
 NS 8  
 DS 0  
 SWH 10000.000 Hz  
 FIDRES 0.305176 Hz  
 AQ 3.2767999 sec  
 RG 12.14  
 DW 50.000 usec  
 DE 10.00 usec  
 TE 298.0 K  
 D1 2.00000000 sec  
 TD0 1  
 SFO1 500.1330008 MHz  
 NUC1 <sup>1</sup>H  
 P1 10.00 usec  
 PLW1 13.50000000 W

F2 - Processing parameters  
 SI 65536  
 SF 500.1300123 MHz  
 WDW EM  
 SSB 0  
 LB 0.30 Hz  
 GB 0  
 PC 1.00

1.753  
 2.311  
 2.322  
 2.333  
 2.382  
 2.384  
 2.394  
 2.404  
 2.406  
 3.654  
 3.665  
 3.669  
 3.676  
 3.680  
 3.691  
 3.772  
 3.779  
 4.664

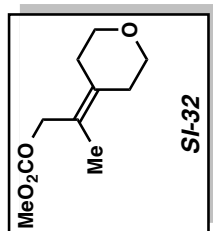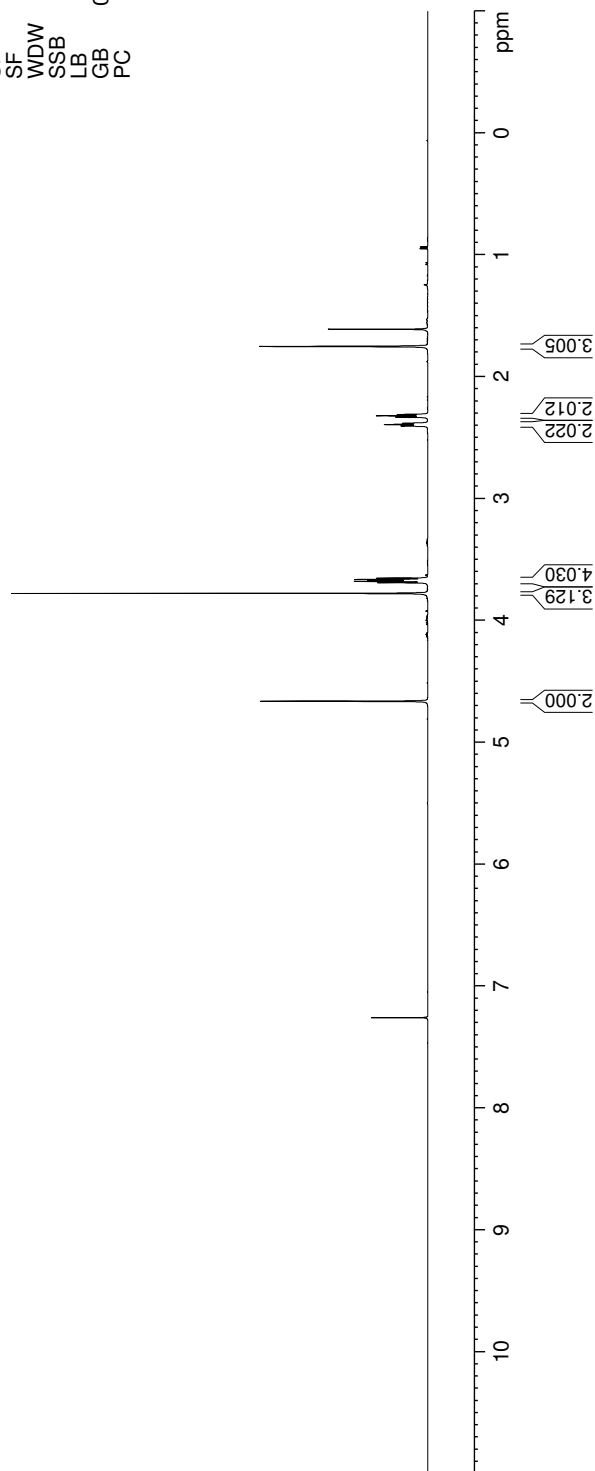

Current Data Parameters  
 NAME JM-4-287  
 EXPNO 100  
 PROCNO 1

F2 - Acquisition Parameters  
 Date 20161216  
 Time 10.21 h  
 INSTRUM av500  
 PROBHD Z119248\_0002 ( z930  
 PULPROG zg30  
 TD 65536  
 SOLVENT CDCl3  
 NS 8  
 DS 0  
 SWH 10000.000 Hz  
 FIDRES 0.305176 Hz  
 AQ 3.2767999 sec  
 RG 21.37  
 DW 50.000 usec  
 DE 10.00 usec  
 TE 298.0 K  
 D1 2.00000000 sec  
 TD0 1  
 SFO1 500.1330008 MHz  
 NUC1 <sup>1</sup>H  
 P1 10.00 usec  
 PLW1 13.50000000 W

F2 - Processing parameters  
 SI 65536  
 SF 500.1300121 MHz  
 WDW EM  
 SSB 0  
 LB 0  
 GB 0  
 PC 1.00

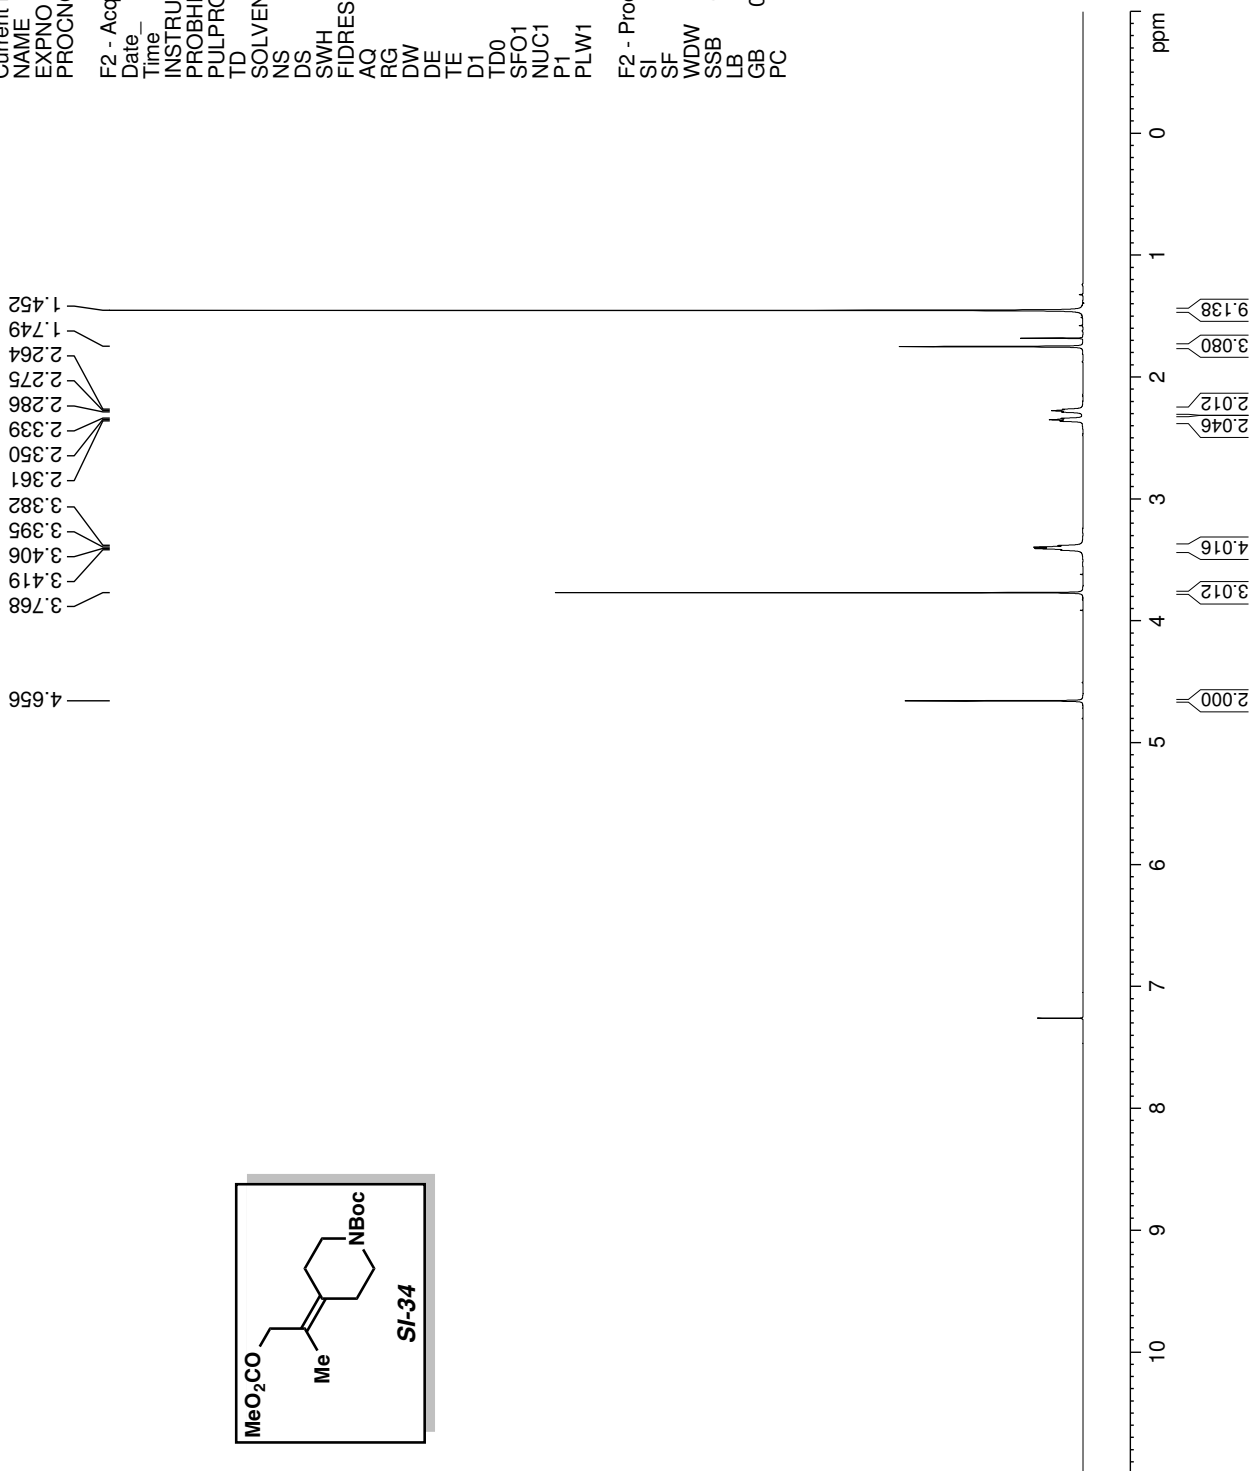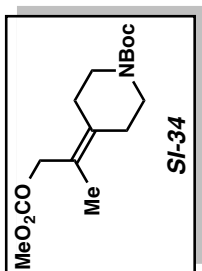

Current Data Parameters  
 NAME sr-1-099.500  
 EXPNO 1  
 PROCNO 1

F2 - Acquisition Parameters  
 Date\_ 20170130  
 Time\_ 9.03 h  
 INSTRUM av500  
 PROBHD Z119248\_0002 (ZG30)  
 PULPROG zg30  
 TD 65536  
 SOLVENT CDC13  
 NS 8  
 DS 0  
 SWH 10000.000 Hz  
 FIDRES 0.305176 Hz  
 AQ 3.2767999 sec  
 RG 12.14  
 DW 50.000 usec  
 DE 10.00 usec  
 TE 298.0 K  
 D1 2.00000000 sec  
 TD0 1  
 SFO1 500.1330008 MHz  
 NUC1 1H  
 P1 10.00 usec  
 PLW1 13.50000000 W

F2 - Processing parameters  
 SI 65536  
 SF 500.1300124 MHz  
 WDW EM  
 SSB 0  
 LB 0  
 GB 0  
 PC 1.00

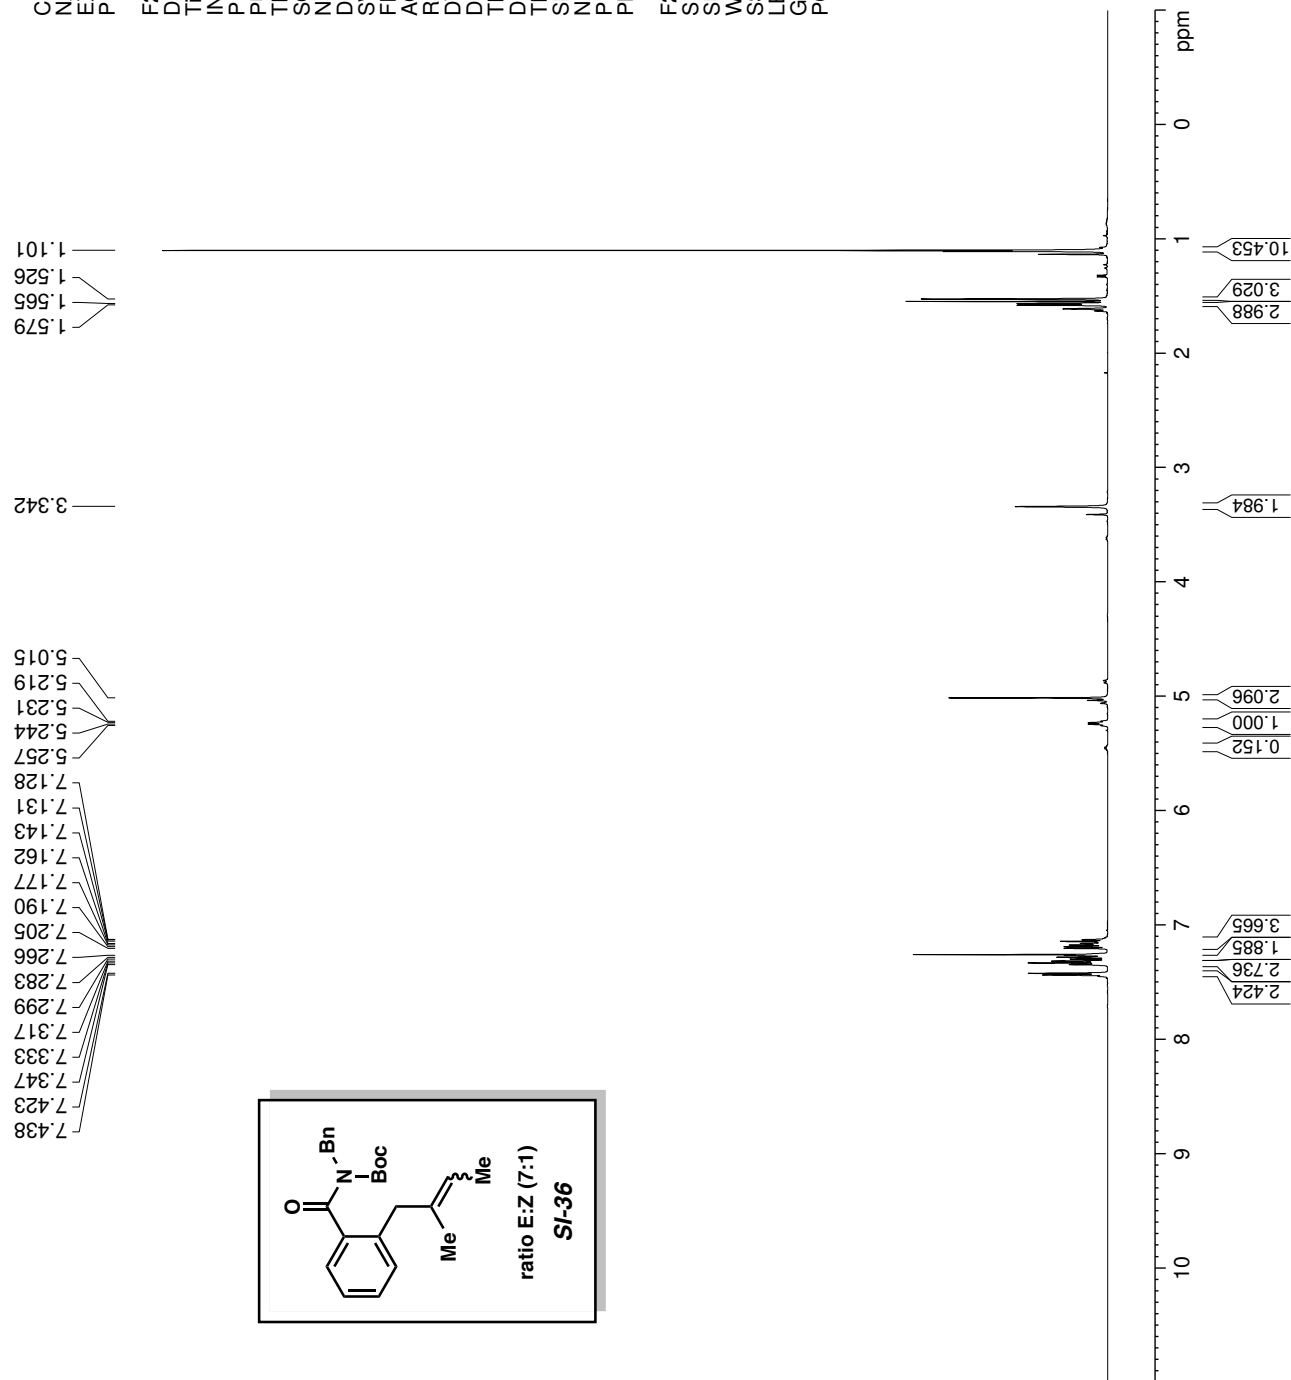

Current Data Parameters  
 NAME JMM-7-221-char  
 EXPNO 1  
 PROCNO 999

F2 - Acquisition Parameters  
 Date\_ 20170131  
 Time\_ 10:10  
 INSTRUM av500  
 PROBHD 5 mm DCH 13C-1  
 PULPROG zg30  
 TD 65536  
 SOLVENT CDCl3  
 NS 30  
 DS 0  
 SWH 10000.000 Hz  
 FIDRES 0.152588 Hz  
 AQ 3.2767999 sec  
 RG 12.14  
 DW 50.000 usec  
 DE 10.00 usec  
 TE 298.0 K  
 D1 2.00000000 sec  
 TD0 1

==== CHANNEL f1 =====  
 SFO1 500.1340010 MHz  
 NUC1 1H  
 P1 10.00 usec  
 PLW1 13.50000000 W

F2 - Processing parameters  
 SI 65536  
 SF 500.1300121 MHz  
 WDW EM  
 SSB 0  
 LB 0  
 GB 0  
 PC 1.00

1.102  
1.803  
1.817  
1.824  
1.825  
1.832  
1.840  
1.847  
1.862  
2.157  
2.171  
2.183  
2.259  
2.263  
2.267  
2.278  
2.282  
2.287  
2.292  
2.296  
2.300  
3.448  
5.011  
5.319  
7.141  
7.144  
7.156  
7.159  
7.167  
7.169  
7.184  
7.197  
7.211  
7.267  
7.282  
7.290  
7.293  
7.305  
7.307  
7.318  
7.323  
7.330  
7.333  
7.347  
7.421  
7.422  
7.436  
7.439

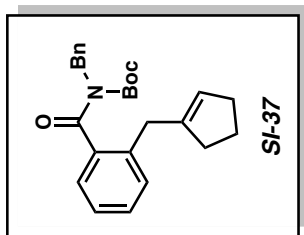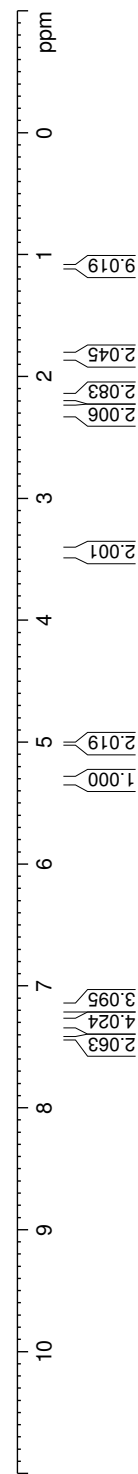



Current Data Parameters  
 NAME JM-4-295  
 EXPNO 100  
 PROCNO 1

F2 - Acquisition Parameters  
 Date 20161218  
 Time 10:25 h  
 INSTRUM av500  
 PROBHD Z119248\_0002 (  
 PULPROG zg30  
 TD 65536  
 SOLVENT CDCl3  
 NS 8  
 DS 0  
 SWH 10000.000 Hz  
 FIDRES 0.305176 Hz  
 AQ 3.2767999 sec  
 RG 12.14  
 DW 50.000 usec  
 DE 10.00 usec  
 TE 298.0 K  
 D1 2.00000000 sec  
 TD0 1  
 SFO1 500.1330008 MHz  
 NUC1 <sup>1</sup>H  
 P1 10.00 usec  
 PLW1 13.50000000 W

F2 - Processing parameters  
 SI 65536  
 SF 500.1300121 MHz  
 WDW EM  
 SSB 0  
 LB 0.30 Hz  
 GB 0  
 PC 1.00

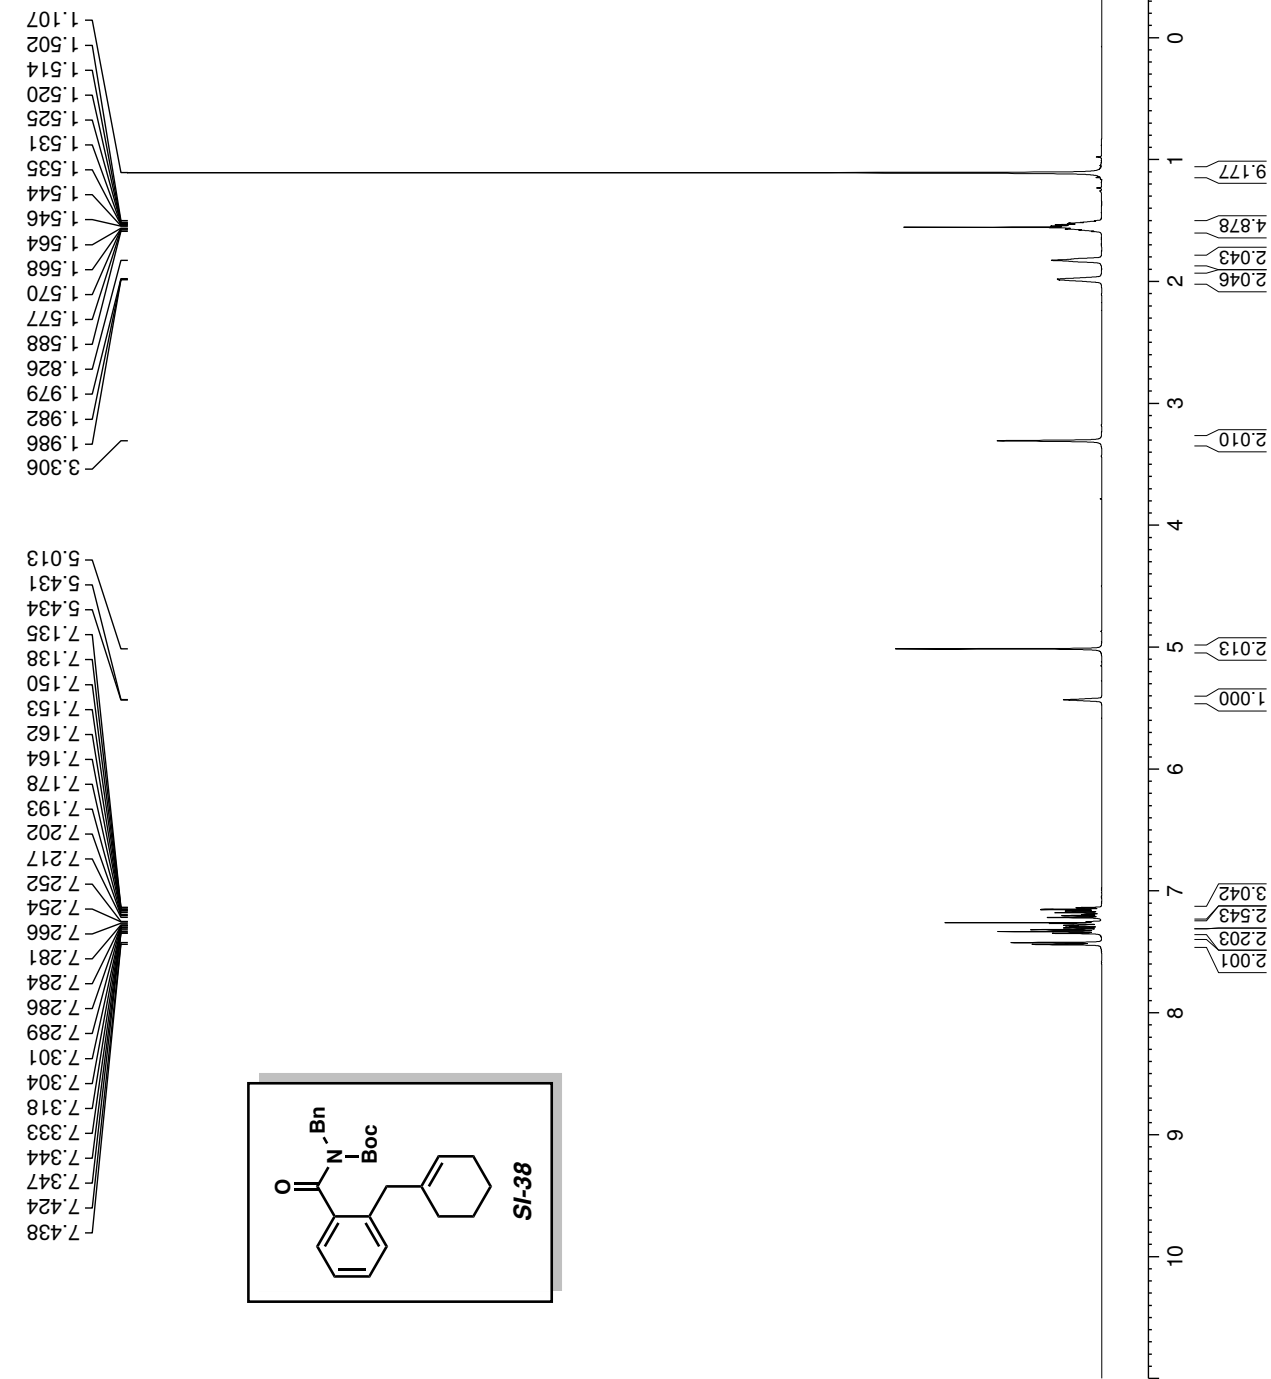

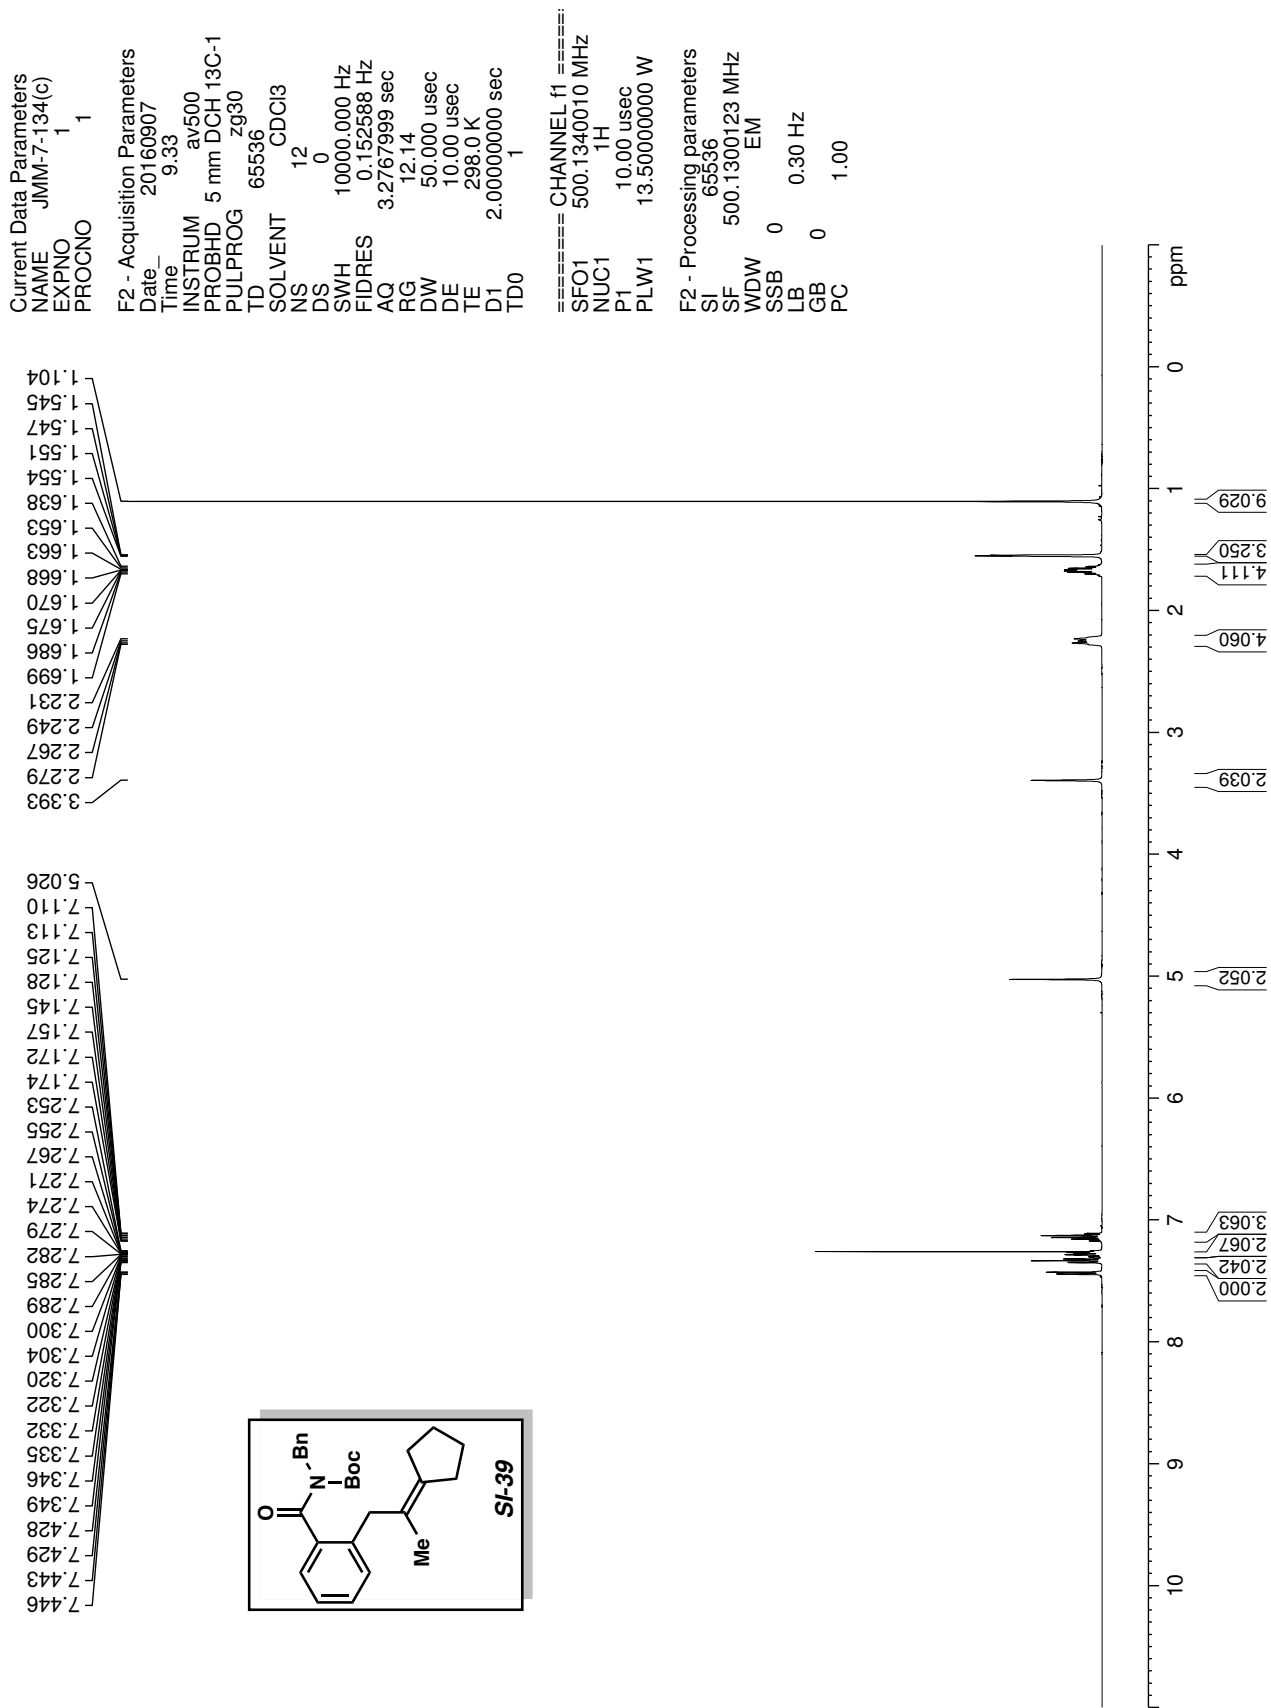

Current Data Parameters  
 NAME JMM-7-135(c)  
 EXPNO 1  
 PROCNO 1

F2 - Acquisition Parameters  
 Date\_ 20160907  
 Time\_ 9.42  
 INSTRUM av500  
 PROBHD 5 mm DCH 13C-1  
 PULPROG zg30  
 TD 65536  
 SOLVENT CDCl3  
 NS 21  
 DS 0  
 SWH 10000.000 Hz  
 FIDRES 0.152588 Hz  
 AQ 3.2767999 sec  
 RG 26.59  
 DW 50.000 usec  
 DE 10.00 usec  
 TE 298.0 K  
 D1 2.0000000 sec  
 TD0 1

==== CHANNEL f1 =====  
 SFO1 500.1340010 MHz  
 NUC1 1H  
 P1 10.00 usec  
 PLW1 13.50000000 W

F2 - Processing parameters  
 SI 65536  
 SF 500.1300124 MHz  
 WDW EM  
 SSB 0  
 LB 0  
 GB 0  
 PC 1.00

1.103  
1.490  
1.501  
1.548  
1.563  
1.569  
1.575  
1.604  
2.155  
2.166  
2.178  
2.246  
2.256

3.444

5.038  
7.102  
7.103  
7.106  
7.116  
7.120  
7.139  
7.154  
7.168  
7.256  
7.266  
7.270  
7.276  
7.279  
7.282  
7.285  
7.288  
7.291  
7.294  
7.306  
7.309  
7.320  
7.324  
7.327  
7.336  
7.339  
7.350  
7.354  
7.435  
7.436  
7.450  
7.453

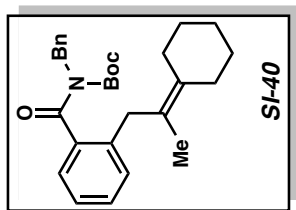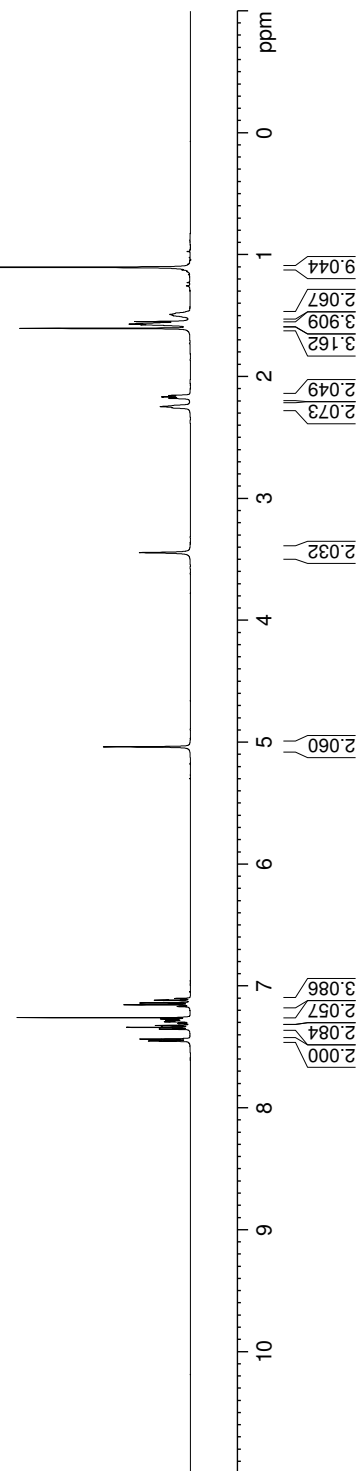

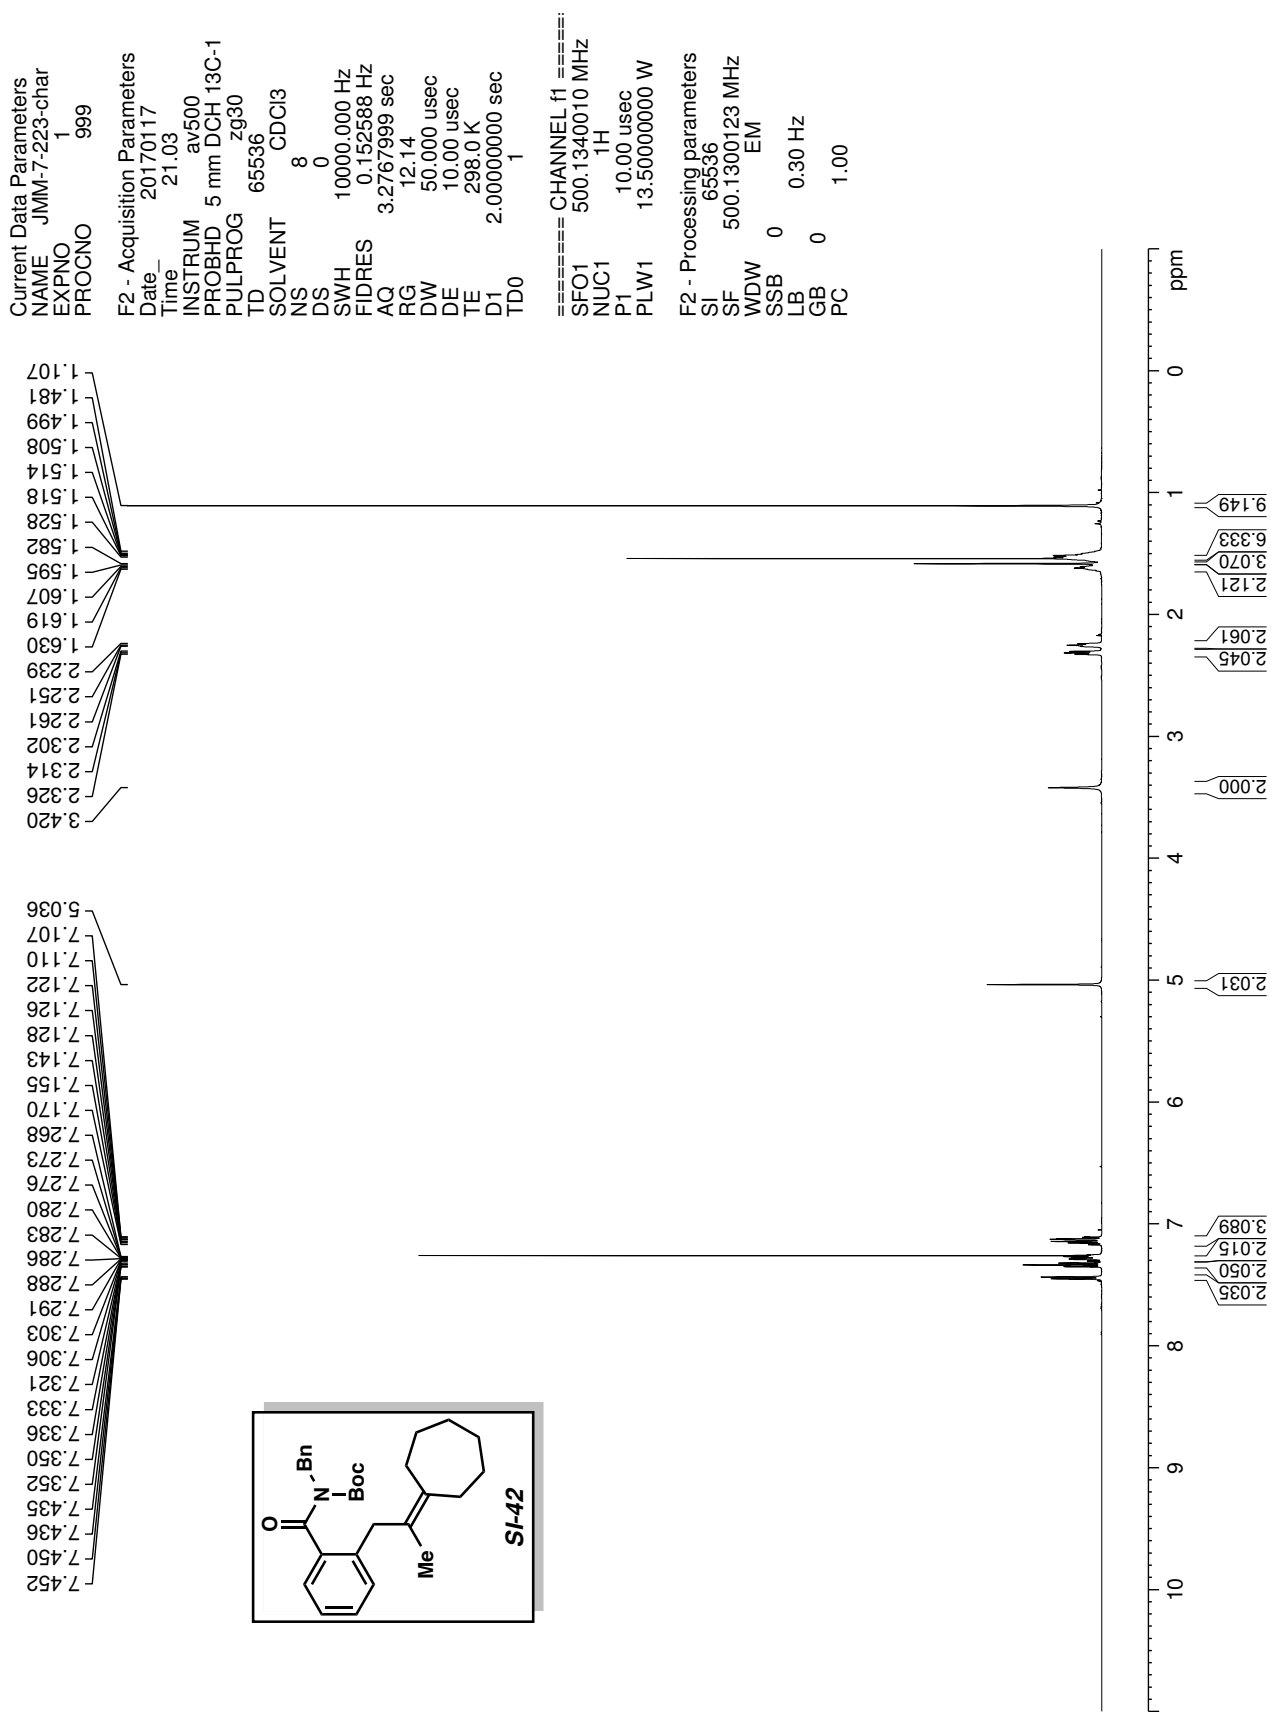

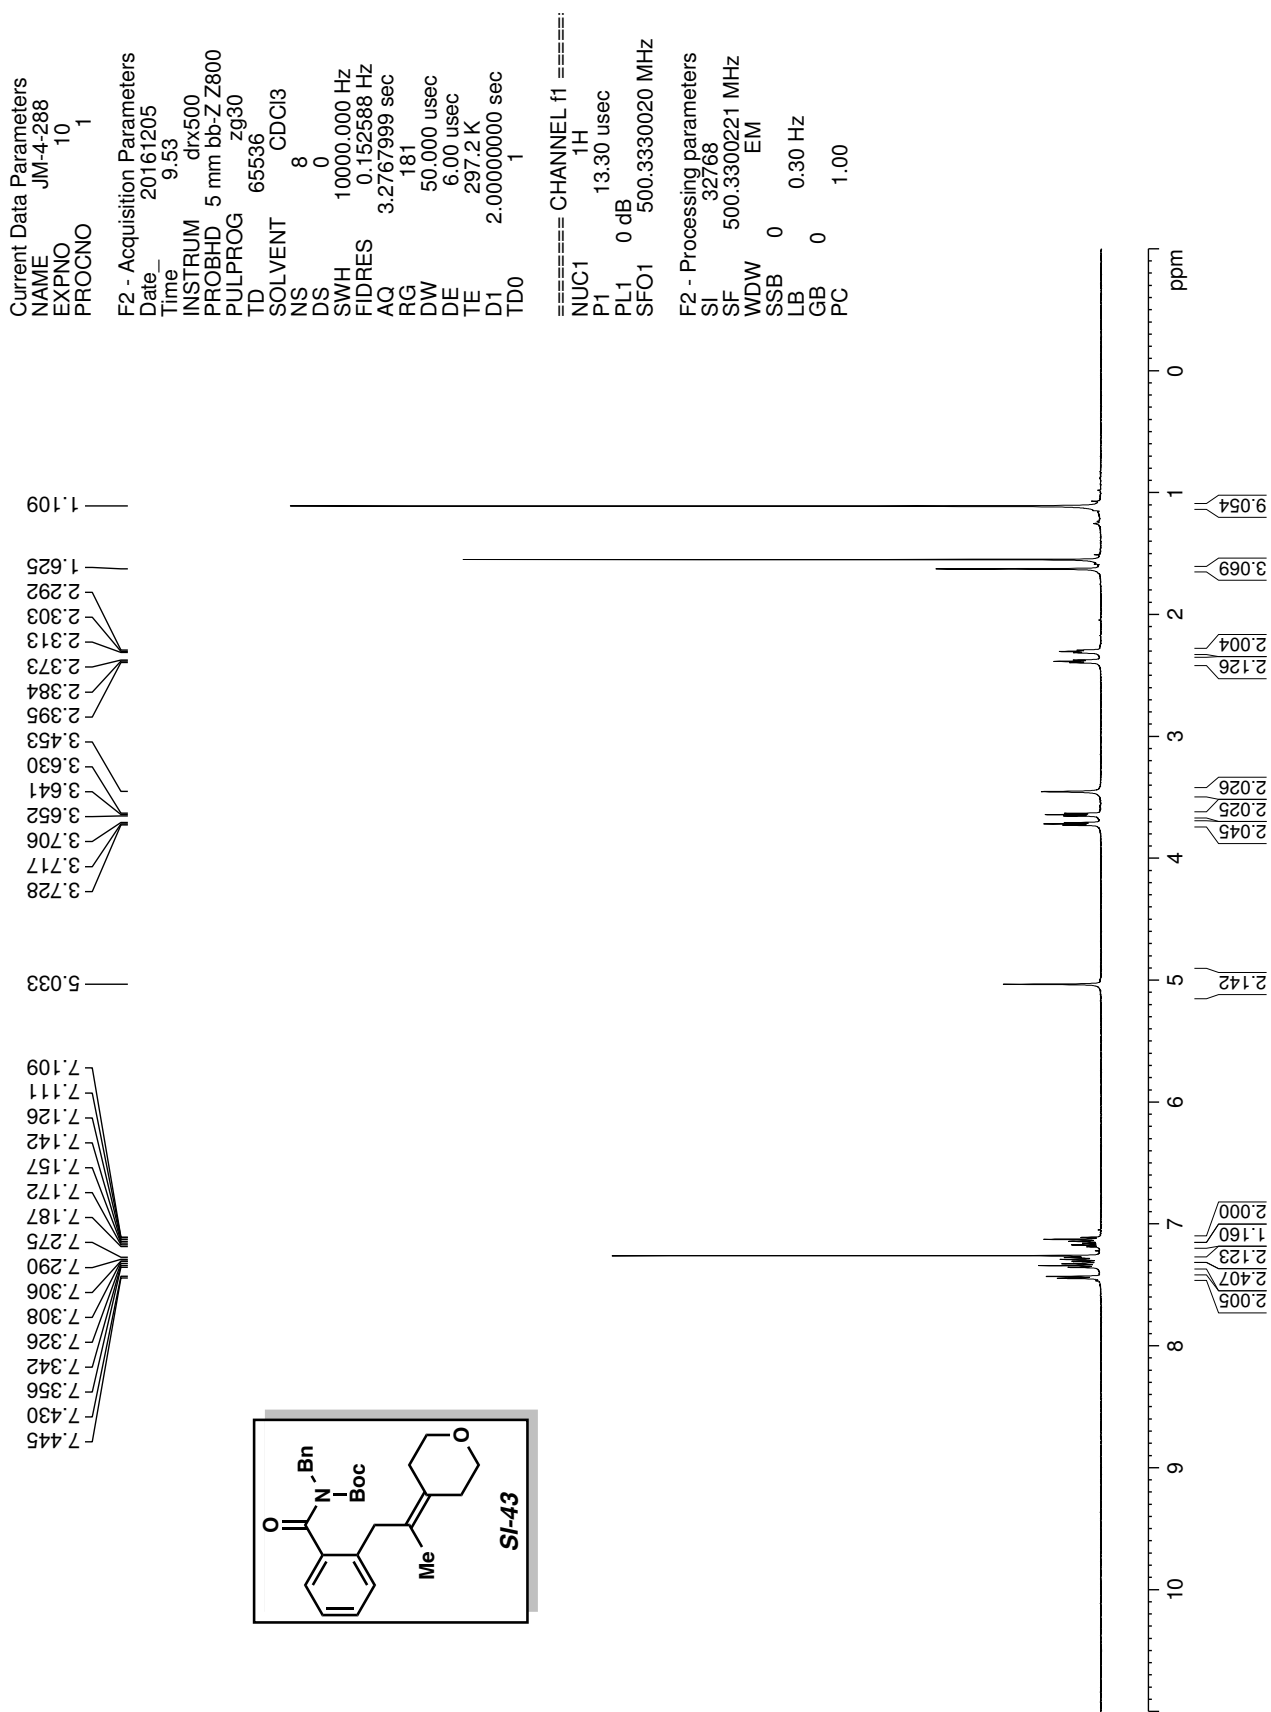

Current Data Parameters  
 NAME JM-4-290  
 EXPNO 100  
 PROCNO 1

F2 - Acquisition Parameters  
 Date\_ 20161218  
 Time\_ 14.30 h  
 INSTRUM av500  
 PROBHD Z119248\_0002 ( )  
 PULPROG zg30  
 TD 65536  
 SOLVENT CDCl3  
 NS 8  
 DS 0  
 SWH 10000.000 Hz  
 FIDRES 0.305176 Hz  
 AQ 3.2767999 sec  
 RG 12.14  
 DW 50.000 usec  
 DE 10.00 usec  
 TE 298.0 K  
 D1 2.00000000 sec  
 TD0 1  
 SFO1 500.1330008 MHz  
 NUC1 <sup>1</sup>H  
 P1 10.00 usec  
 PLW1 13.50000000 W

F2 - Processing parameters  
 SI 65536  
 SF 500.1300122 MHz  
 WDW EM  
 SSB 0  
 LB 0  
 GB 0  
 PC 1.00

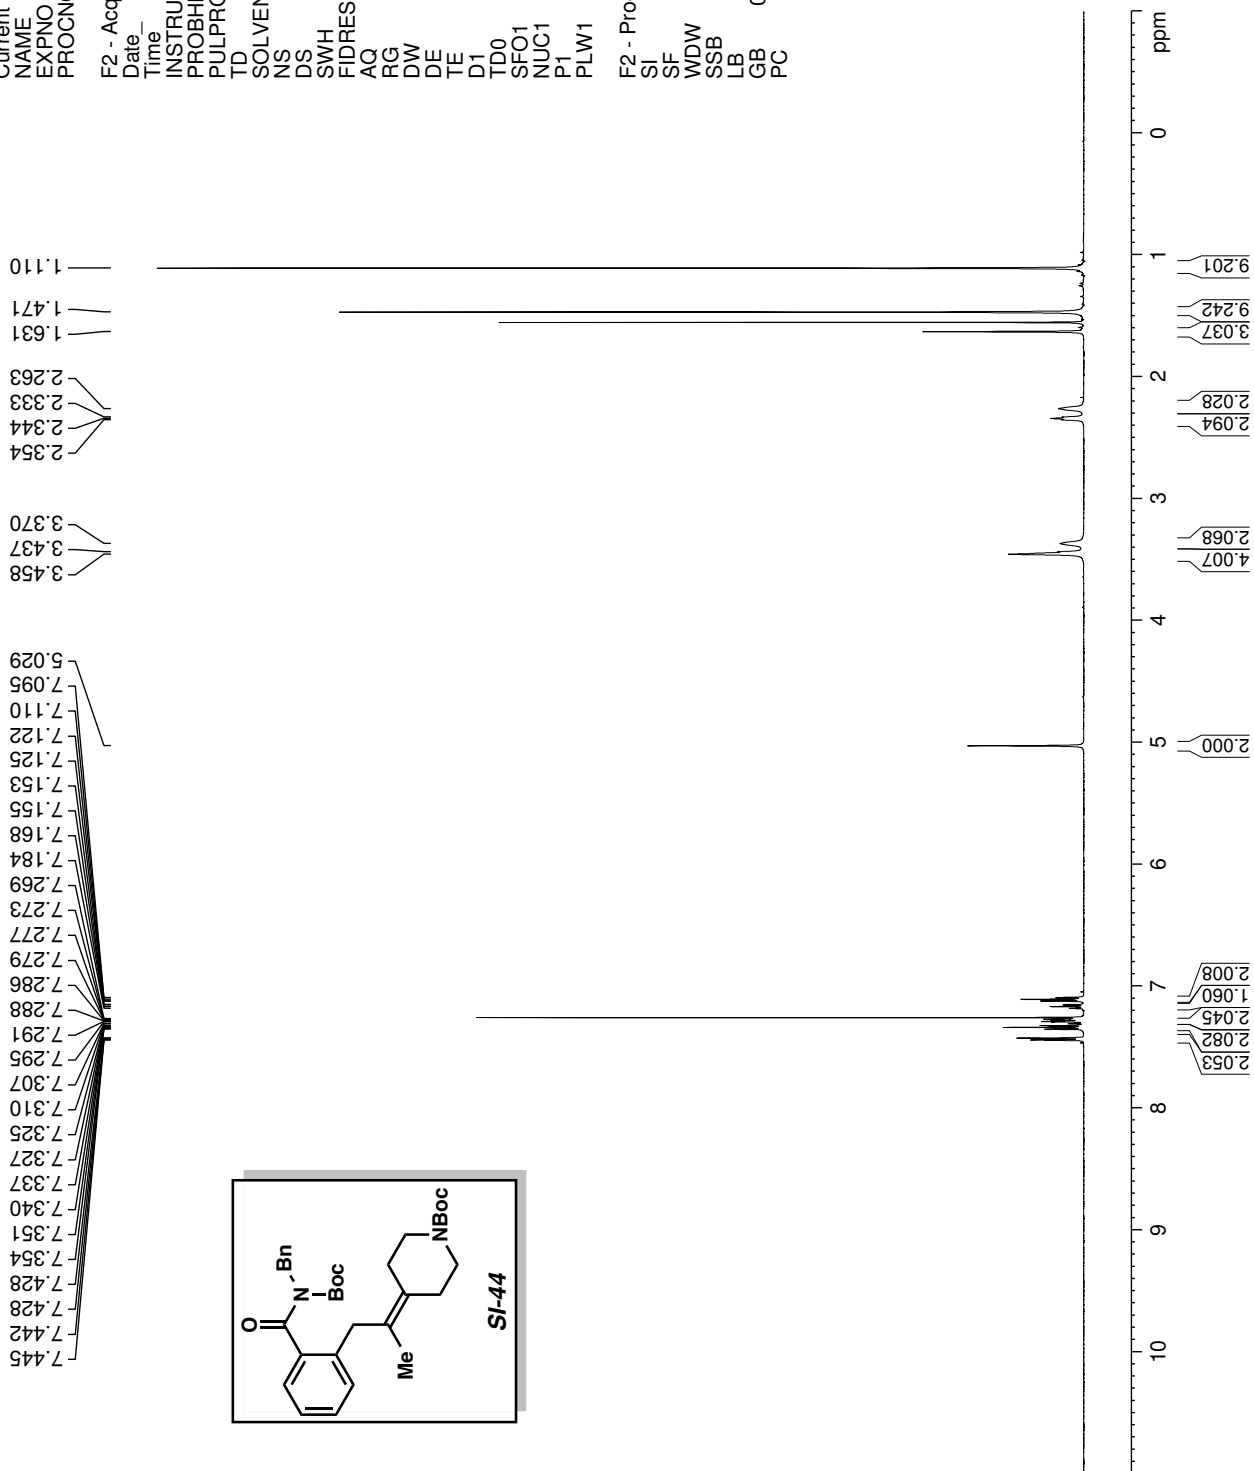

Current Data Parameters  
 NAME JM-5-067  
 EXPNO 100  
 PROCNO 1

F2 - Acquisition Parameters  
 Date\_ 20170217  
 Time\_ 18.03 h  
 INSTRUM av500  
 PROBHD Z119248\_0002 ( )  
 PULPROG zg30  
 TD 65536  
 SOLVENT CDCl3  
 NS 8  
 DS 0  
 SWH 10000.000 Hz  
 FIDRES 0.305176 Hz  
 AQ 3.2767999 sec  
 RG 12.14  
 DW 50.000 usec  
 DE 10.00 usec  
 TE 298.0 K  
 D1 2.00000000 sec  
 TD0 1  
 SFO1 500.1330008 MHz  
 NUC1 <sup>1</sup>H  
 P1 10.00 usec  
 PLW1 13.50000000 W

F2 - Processing parameters  
 SI 65536  
 SF 500.1300122 MHz  
 WDW EM  
 SSB 0  
 LB 0  
 GB 0  
 PC 1.00

1.738  
1.685  
1.683  
1.563  
1.560  
1.159

7.429  
7.412  
7.411  
7.359  
7.358  
7.354  
7.343  
7.341  
7.331  
7.328  
7.324  
7.296  
7.294  
7.291  
7.283  
7.279  
7.274  
7.267  
7.264  
7.073  
7.062  
7.056  
7.045  
7.005  
6.999  
6.988  
6.982  
6.971  
6.966  
6.852  
6.847  
6.835  
6.829  
5.023  
3.343

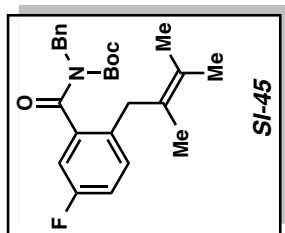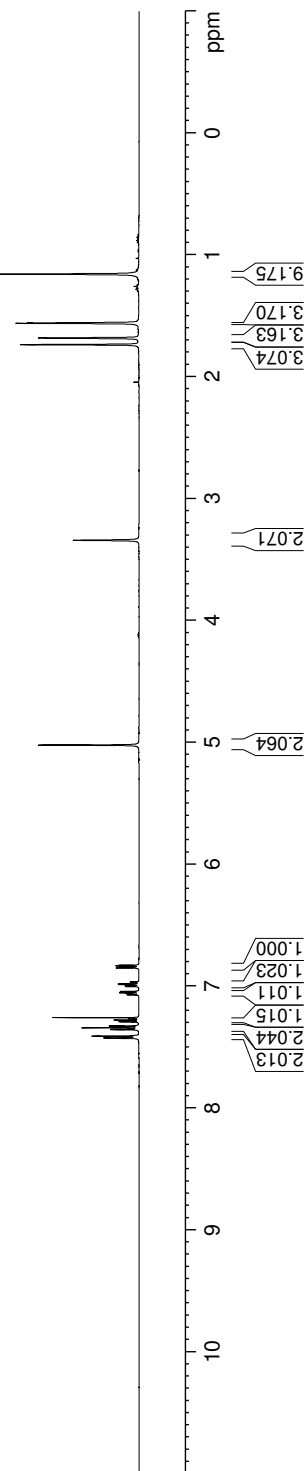

Current Data Parameters  
 NAME JM-5-055  
 EXPNO 200  
 PROCNO 1

F2 - Acquisition Parameters  
 Date\_ 20170206  
 Time\_ 19.08 h  
 INSTRUM av500  
 PROBHD Z119248\_0002 (  
 PULPROG zg30  
 TD 65536  
 SOLVENT CDCl3  
 NS 8  
 DS 0  
 SWH 10000.000 Hz  
 FIDRES 0.305176 Hz  
 AQ 3.2767999 sec  
 RG 12.14  
 DW 50.000 usec  
 DE 10.00 usec  
 TE 298.0 K  
 D1 2.00000000 sec  
 TD0 1  
 SFO1 500.1330008 MHz  
 NUC1 1H  
 P1 10.00 usec  
 PLW1 13.50000000 W

F2 - Processing parameters  
 SI 65536  
 SF 500.1300121 MHz  
 WDW EM  
 SSB 0  
 LB 0 0.30 Hz  
 GB 0  
 PC 1.00

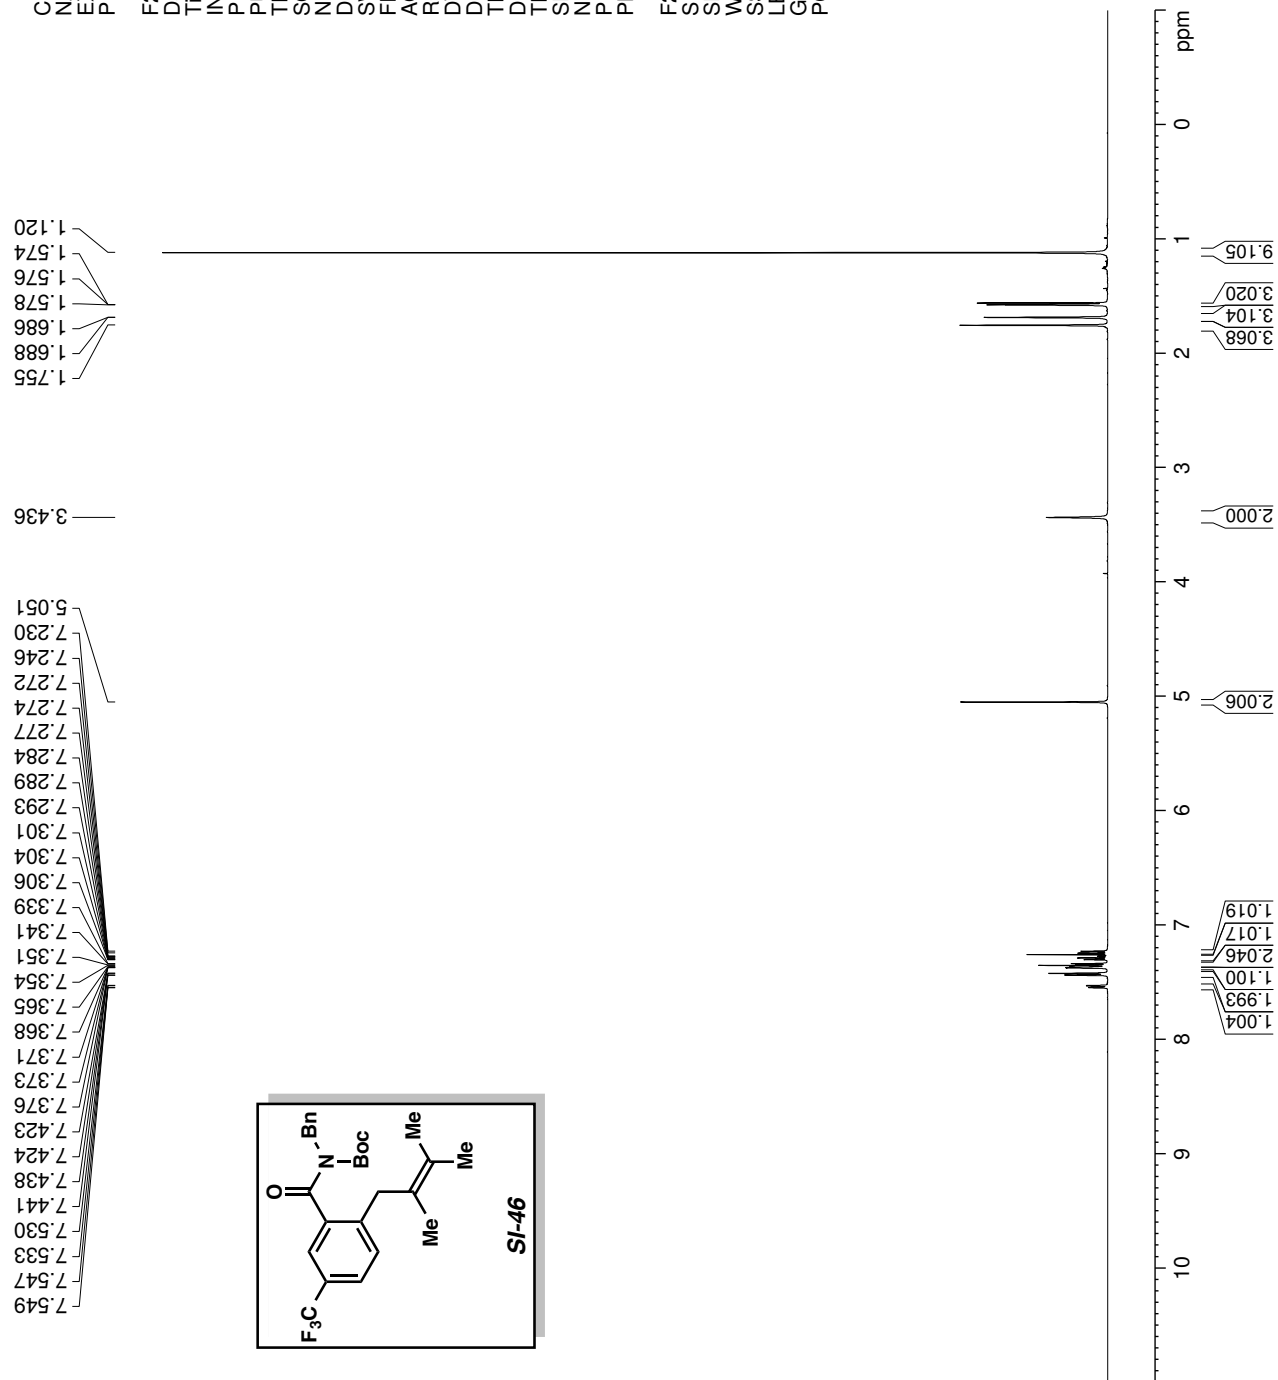





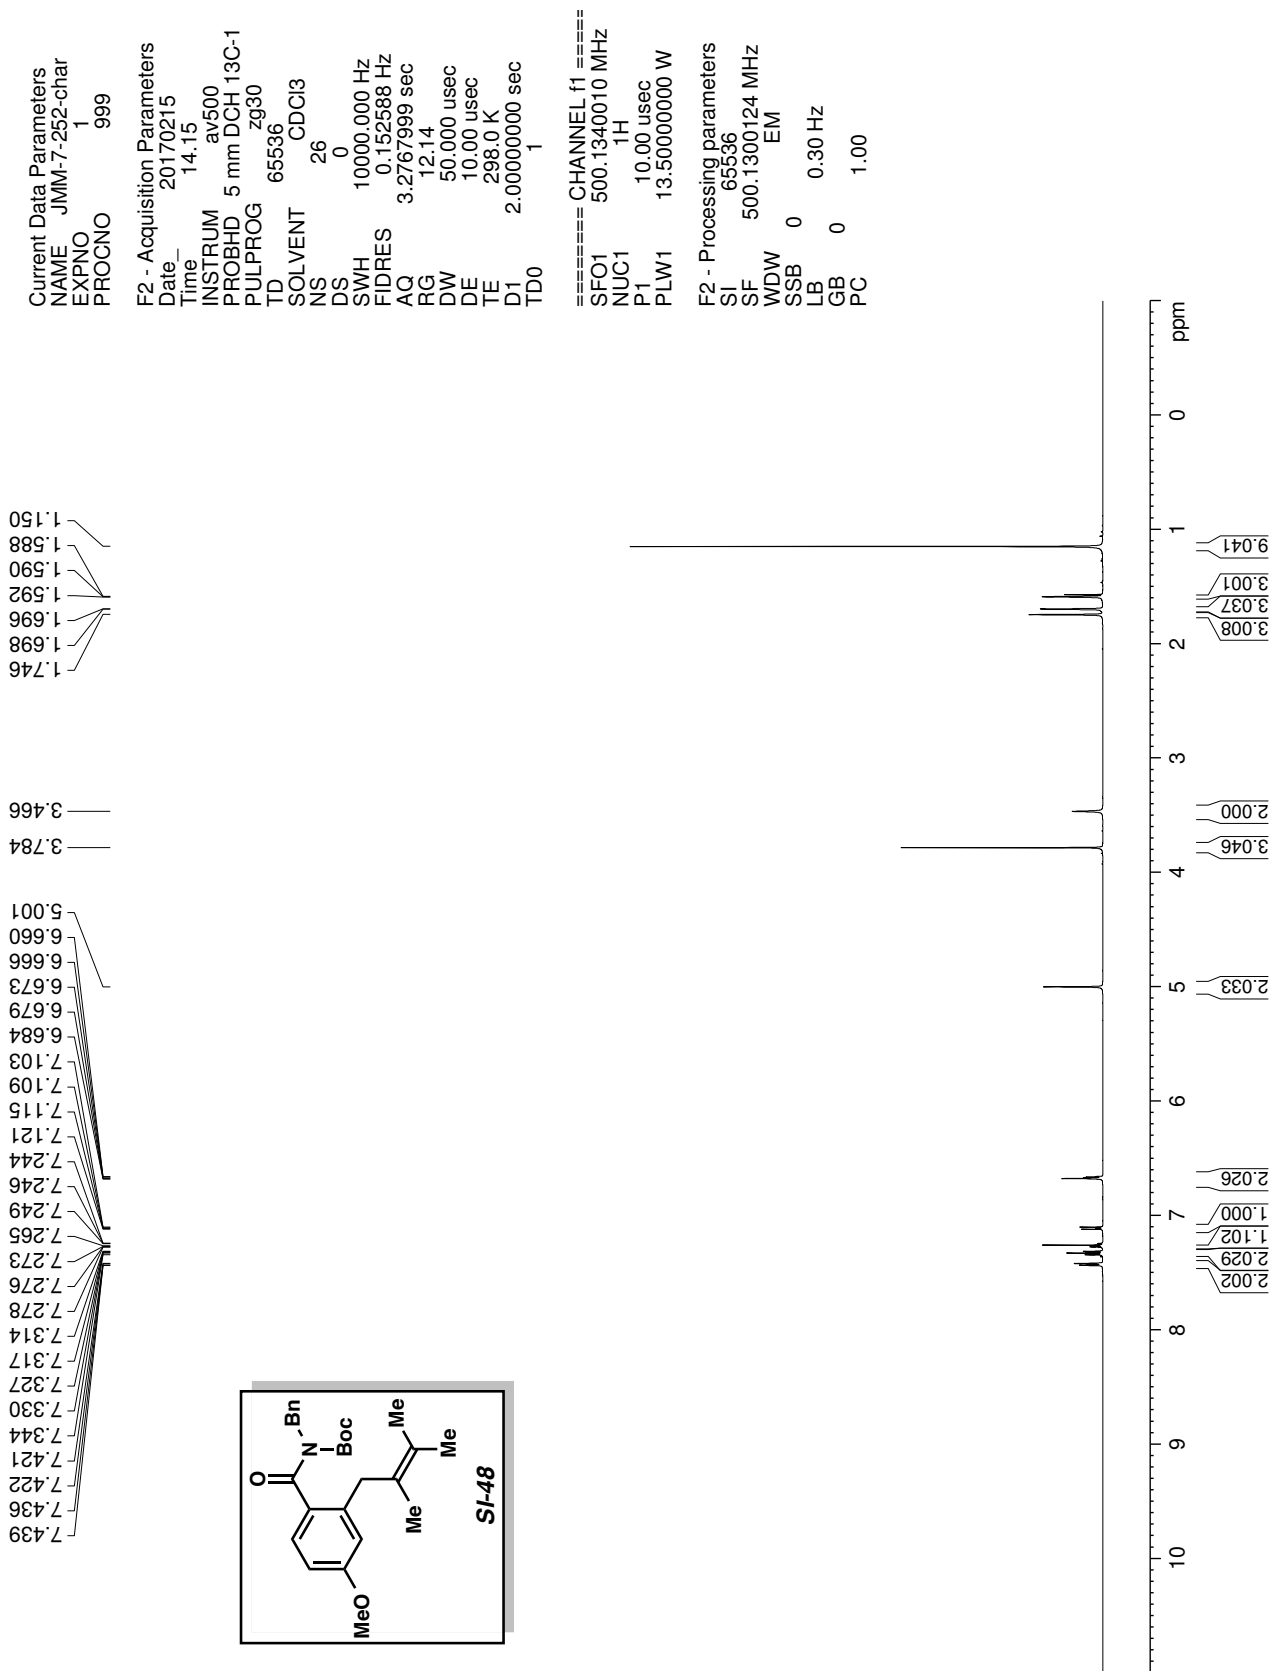

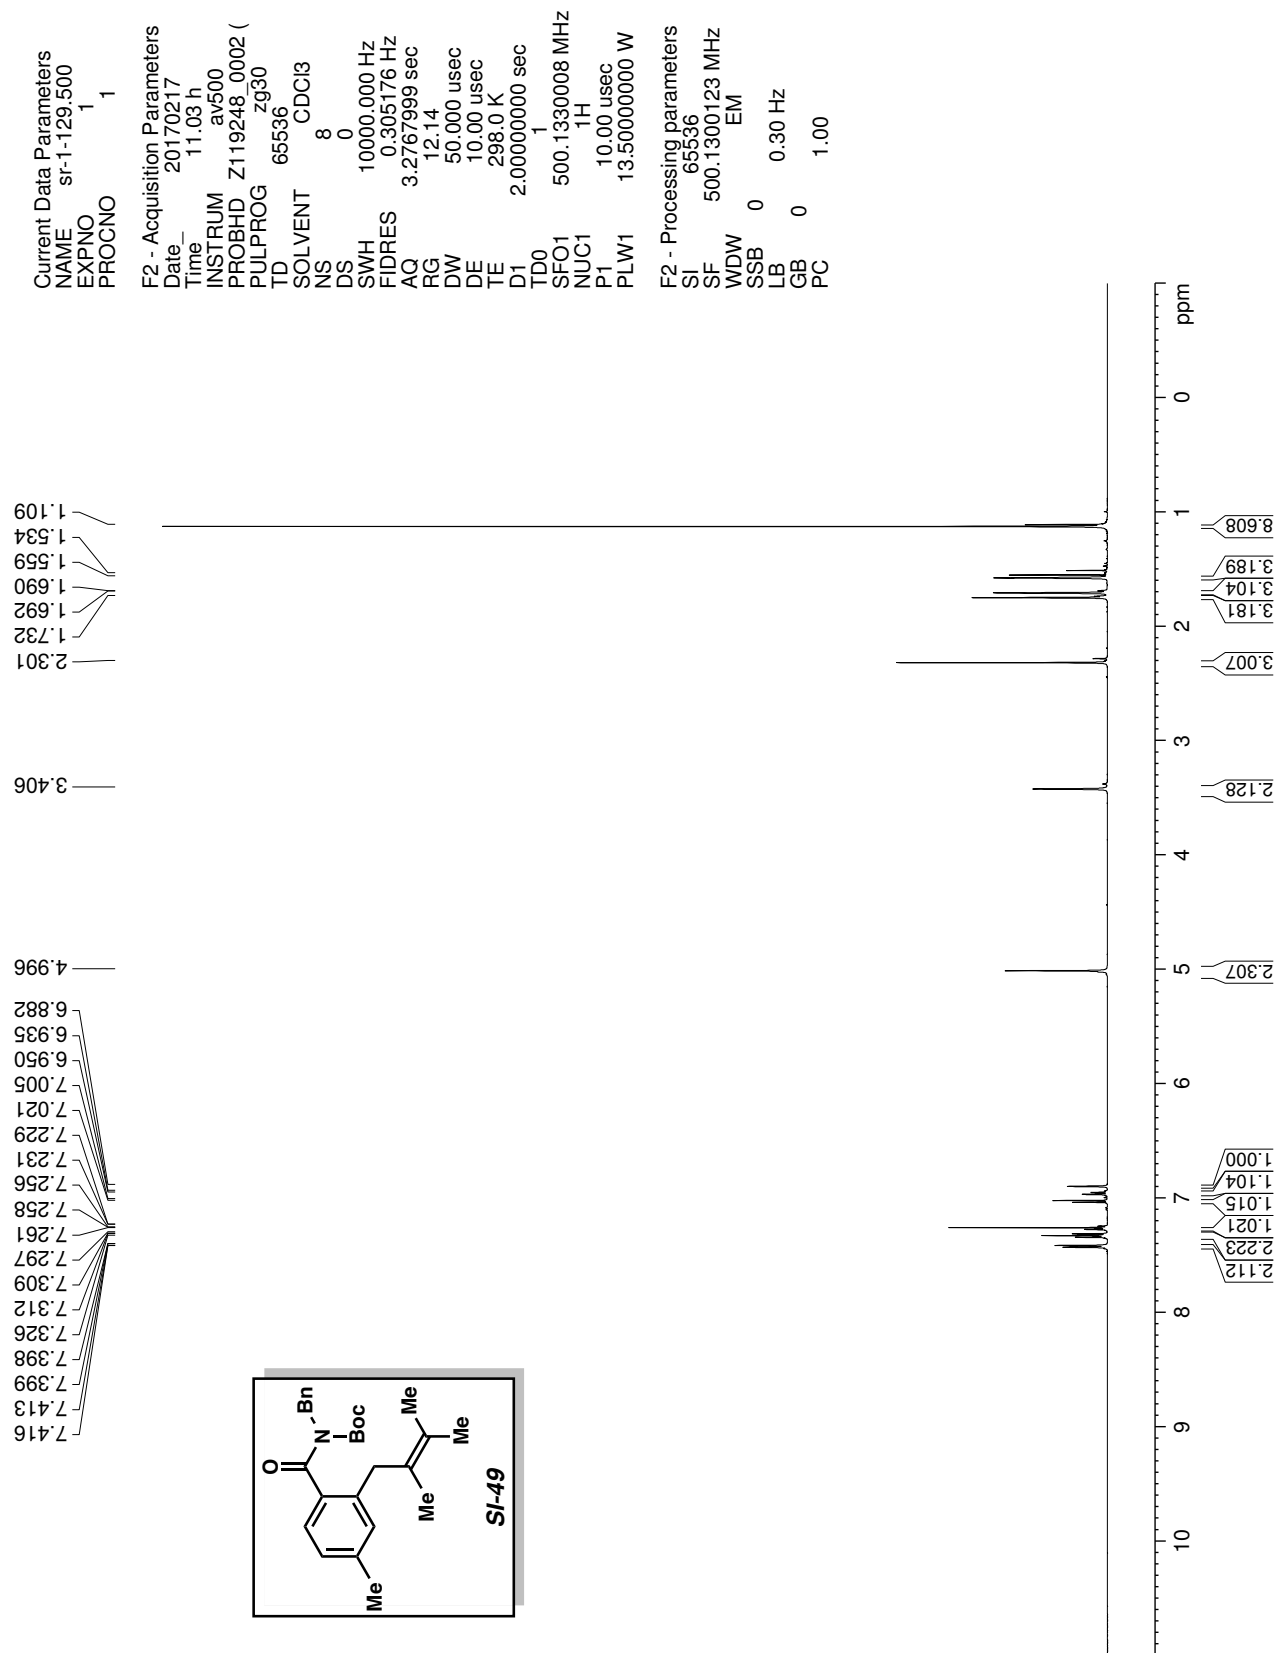

Current Data Parameters  
 NAME sr-1-101.500  
 EXPNO 1  
 PROCNO 1

F2 - Acquisition Parameters  
 Date\_ 20170131  
 Time\_ 9.08 h  
 INSTRUM av500  
 PROBHD Z119248\_0002 ( zg30  
 PULPROG 65536  
 TD 8  
 SOLVENT CDC13  
 NS 0  
 DS 10000.000 Hz  
 SWH 0.305176 Hz  
 FIDRES 3.2767999 sec  
 AQ 23.34  
 RG 50.000 usec  
 DW 10.00 usec  
 DE 298.0 K  
 TE 2.00000000 sec  
 D1 1  
 TD0 500.1330008 MHz  
 SFO1 1H  
 P1 10.00 usec  
 PLW1 13.50000000 W

F2 - Processing parameters  
 SI 65536  
 SF 500.1300133 MHz  
 WDW EM  
 SSB 0  
 LB 0.30 Hz  
 GB 0  
 PC 1.00

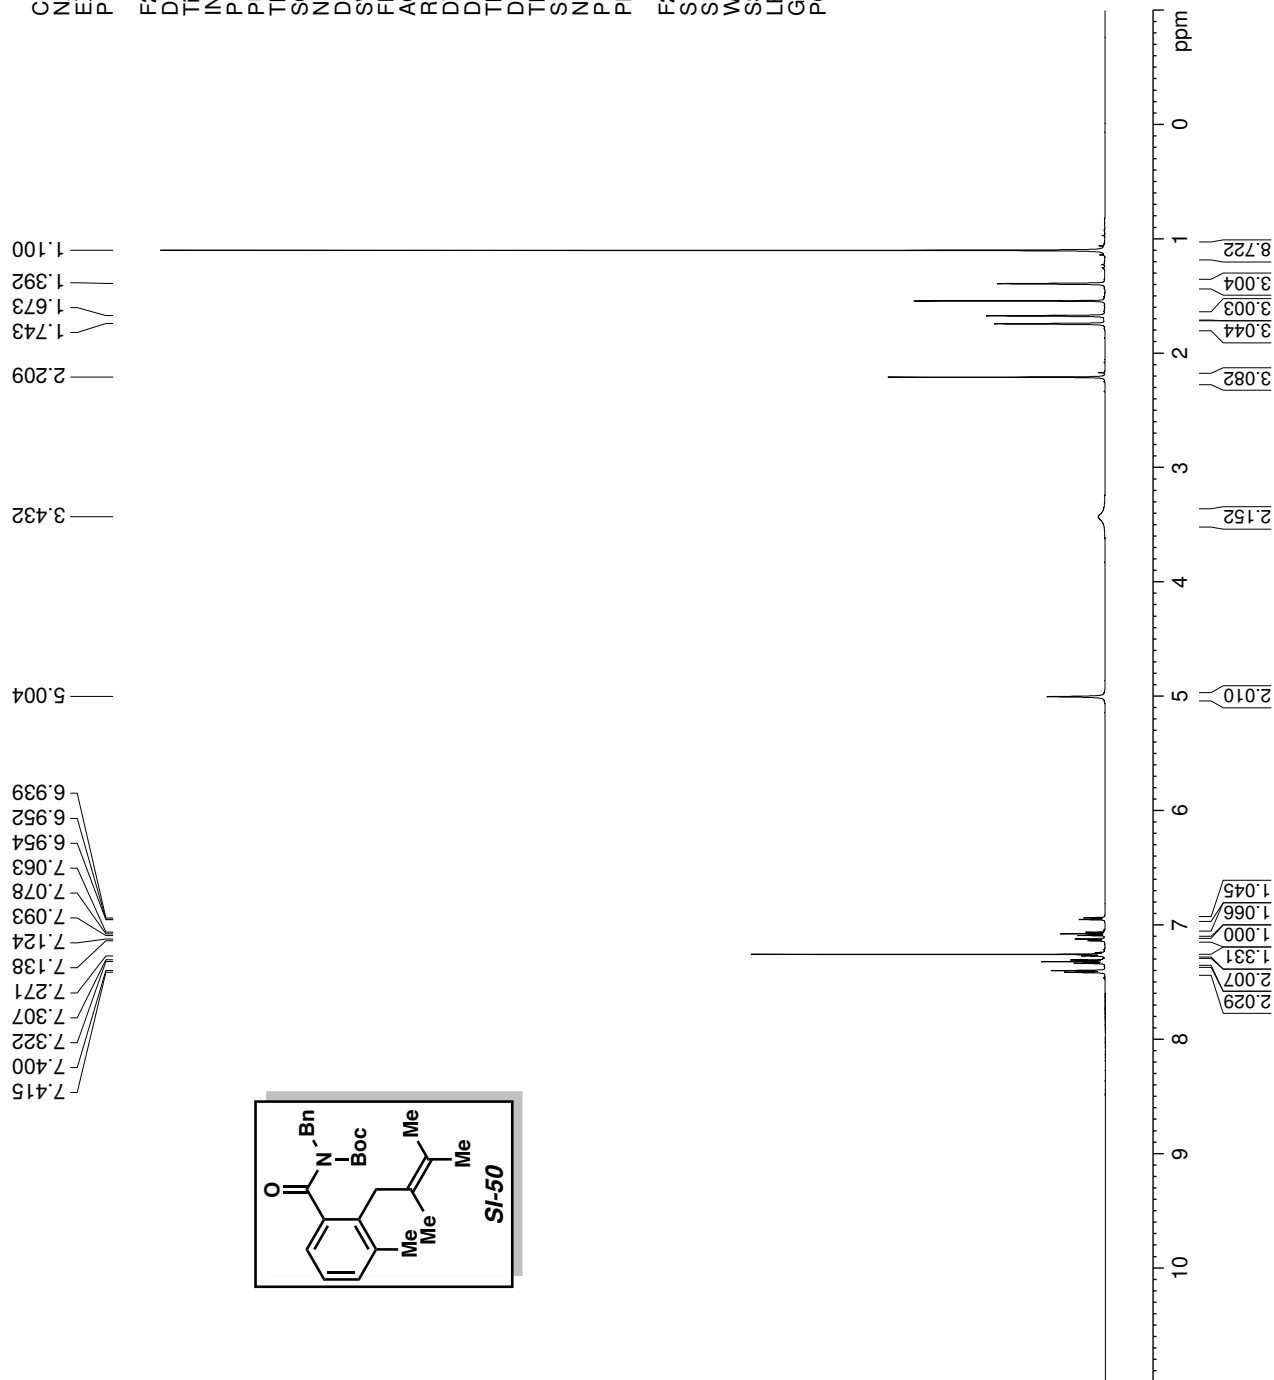

Current Data Parameters  
 NAME JM-5-025  
 EXPNO 2  
 PROCNO 1

F2 - Acquisition Parameters  
 Date 20170115  
 Time 13.48 h  
 INSTRUM av500  
 PROBHD Z119248\_0002 ( )  
 PULPROG zg30  
 TD 65536  
 SOLVENT CDCl3  
 NS 16  
 DS 0  
 SWH 10000.000 Hz  
 FIDRES 0.305176 Hz  
 AQ 3.2767999 sec  
 RG 12.14  
 DW 50.000 usec  
 DE 10.00 usec  
 TE 298.0 K  
 D1 2.00000000 sec  
 TD0 1  
 SFO1 500.1330008 MHz  
 NUC1 <sup>1</sup>H  
 P1 10.00 usec  
 PLW1 13.50000000 W

F2 - Processing parameters  
 SI 65536  
 SF 500.1300123 MHz  
 WDW EM  
 SSB 0  
 LB 0.30 Hz  
 GB 0  
 PC 1.00

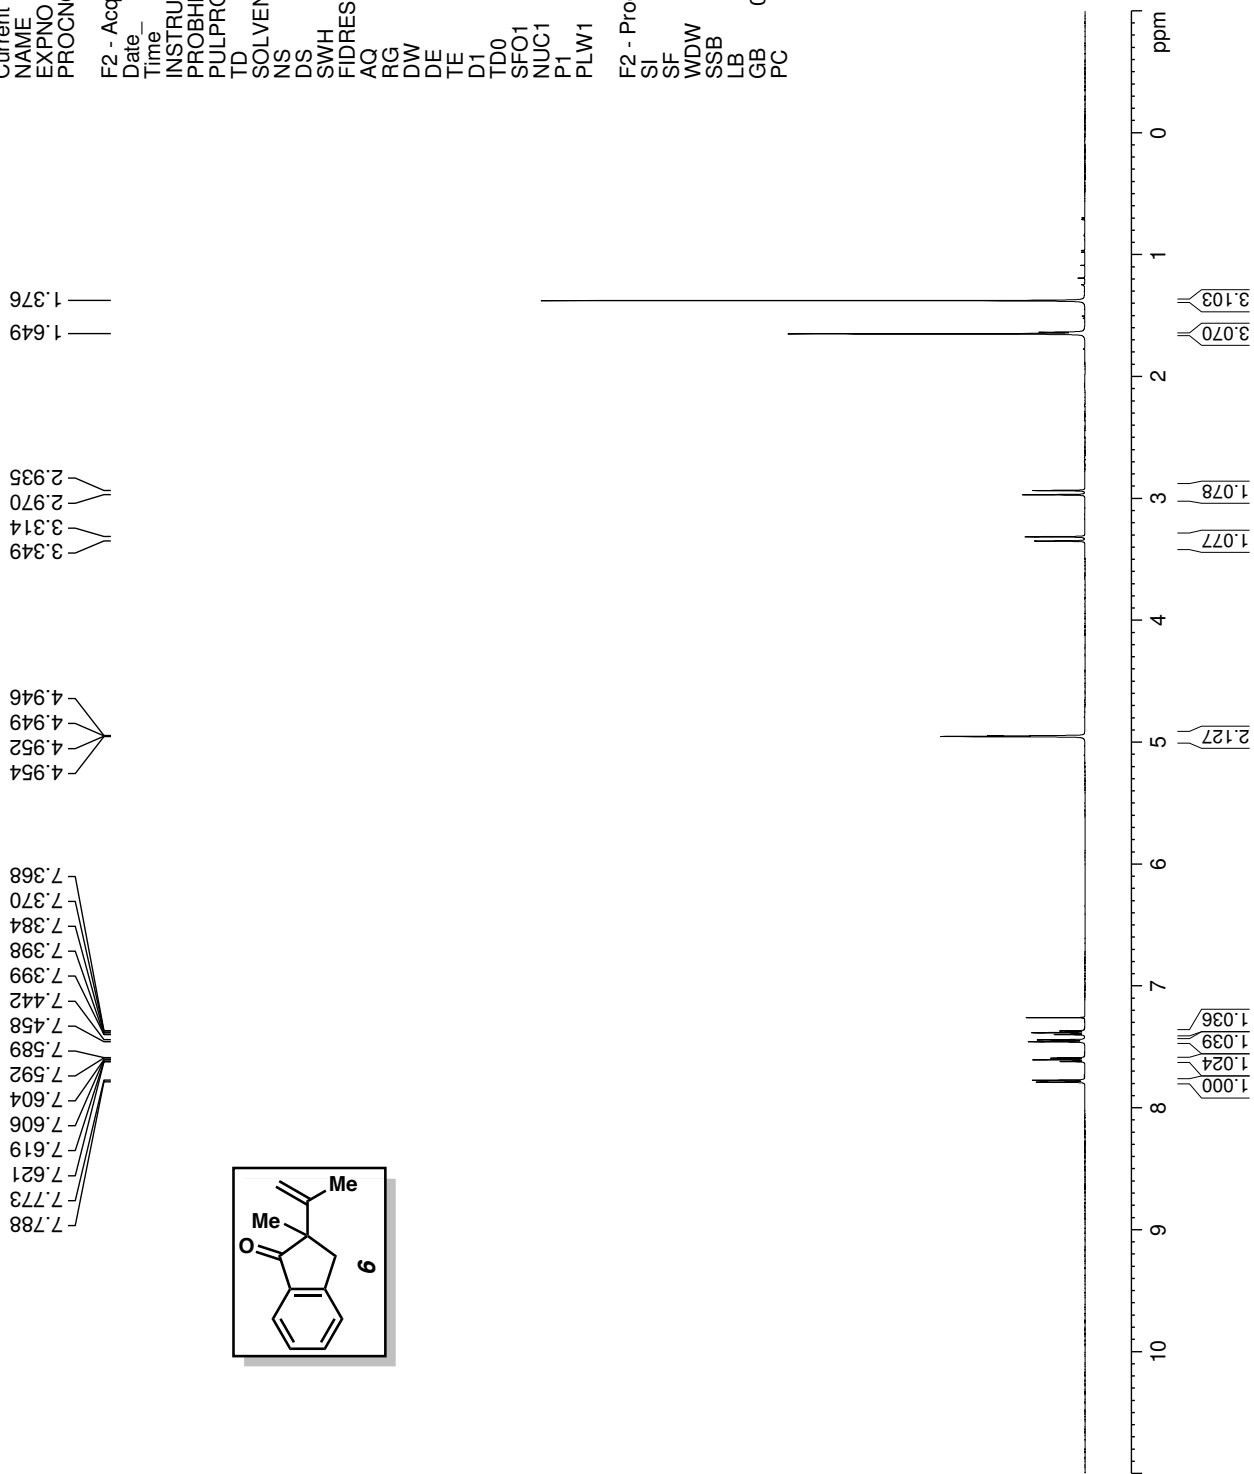

Current Data Parameters  
 NAME sr-1-108.500.6  
 EXPNO 1  
 PROCNO 1

F2 - Acquisition Parameters  
 Date 20170207  
 Time 10.13 h  
 INSTRUM av500  
 PROBHD Z119248\_0002 ( zq30  
 PULPROG zg30  
 TD 65536  
 SOLVENT CDC13  
 NS 8  
 DS 0  
 SWH 10000.000 Hz  
 FIDRES 0.305176 Hz  
 AQ 3.2767999 sec  
 RG 26.59  
 DW 50.000 usec  
 DE 10.00 usec  
 TE 298.0 K  
 D1 2.00000000 sec  
 TD0 1  
 SFO1 500.1330008 MHz  
 NUC1 1H  
 P1 10.00 usec  
 PLW1 13.50000000 W

F2 - Processing parameters  
 SI 65536  
 SF 500.1300133 MHz  
 WDW EM  
 SSB 0  
 LB 0  
 GB 0  
 PC 1.00

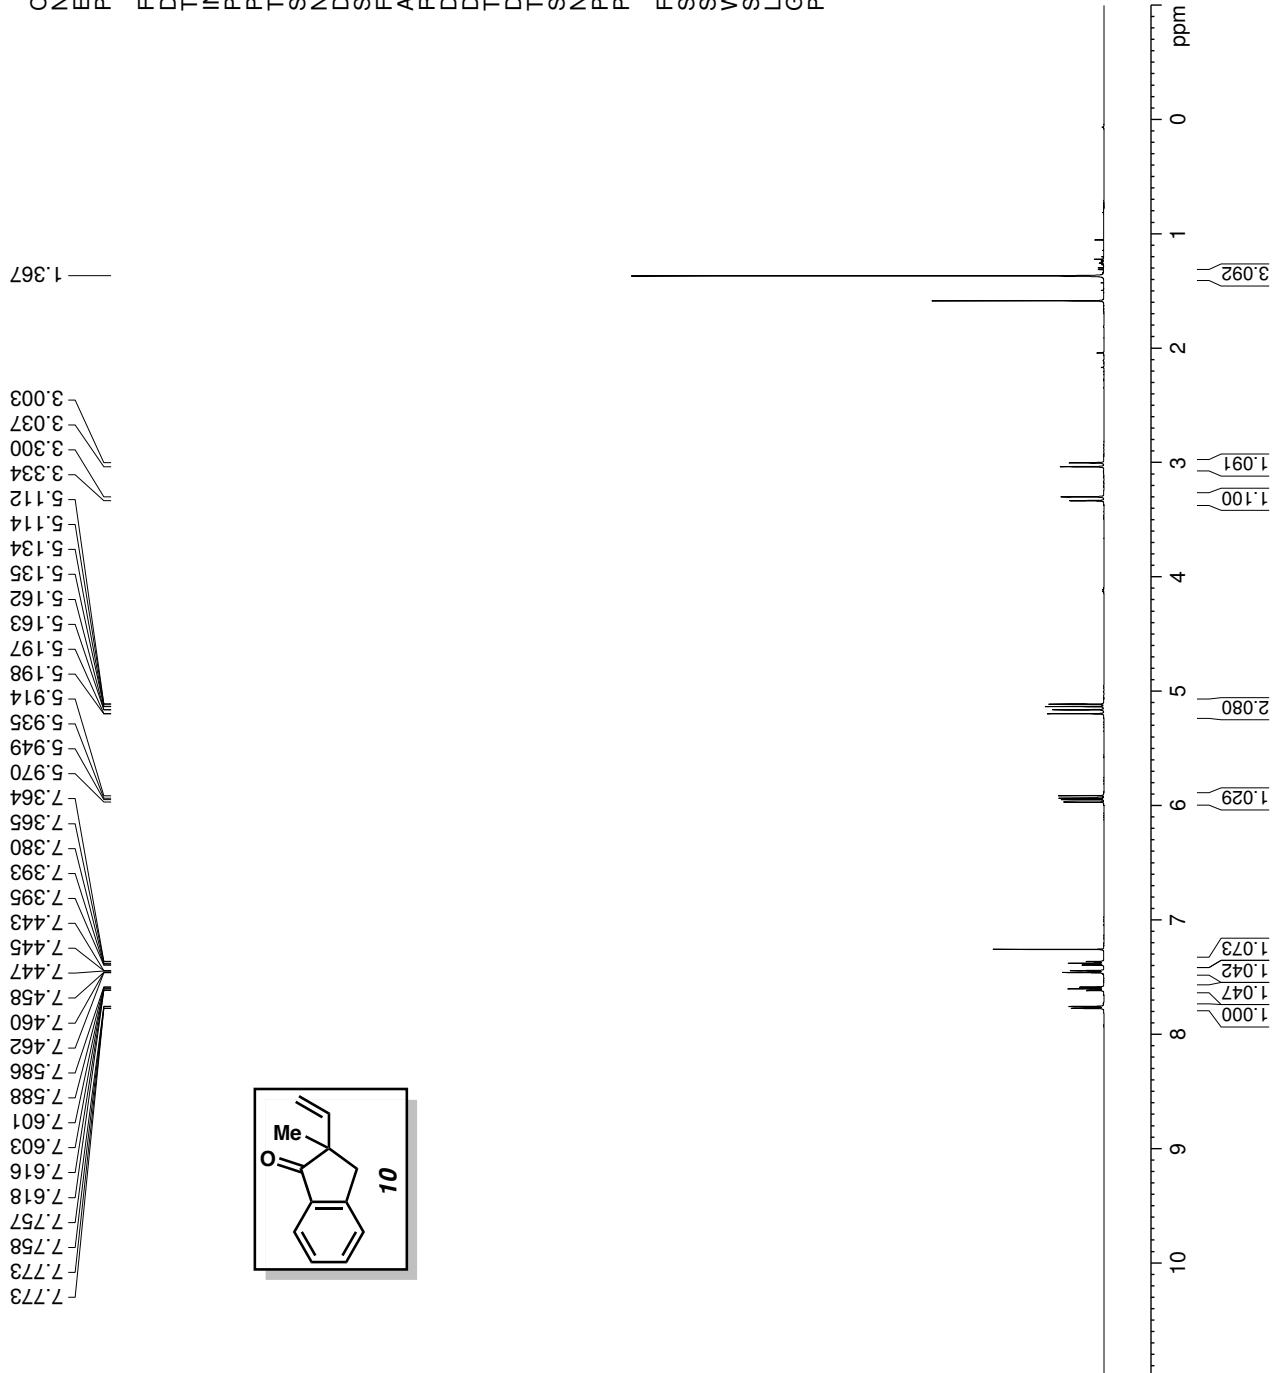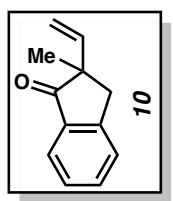

Current Data Parameters  
 NAME JM-5-019  
 EXPNO 400  
 PROCNO 1

F2 - Acquisition Parameters  
 Date 20170109  
 Time 18.27 h  
 INSTRUM av500  
 PROBHD Z119248\_0002 (  
 PULPROG zg30  
 TD 65536  
 SOLVENT CDCl3  
 NS 8  
 DS 0  
 SWH 10000.000 Hz  
 FIDRES 0.305176 Hz  
 AQ 3.2767999 sec  
 RG 12.14  
 DW 50.000 usec  
 DE 10.00 usec  
 TE 298.0 K  
 D1 2.00000000 sec  
 TD0 1  
 SFO1 500.1330008 MHz  
 NUC1 <sup>1</sup>H  
 P1 10.00 usec  
 PLW1 13.50000000 W

F2 - Processing parameters  
 SI 65536  
 SF 500.1300146 MHz  
 WDW EM  
 SSB 0  
 LB 0  
 GB 0  
 PC 1.00

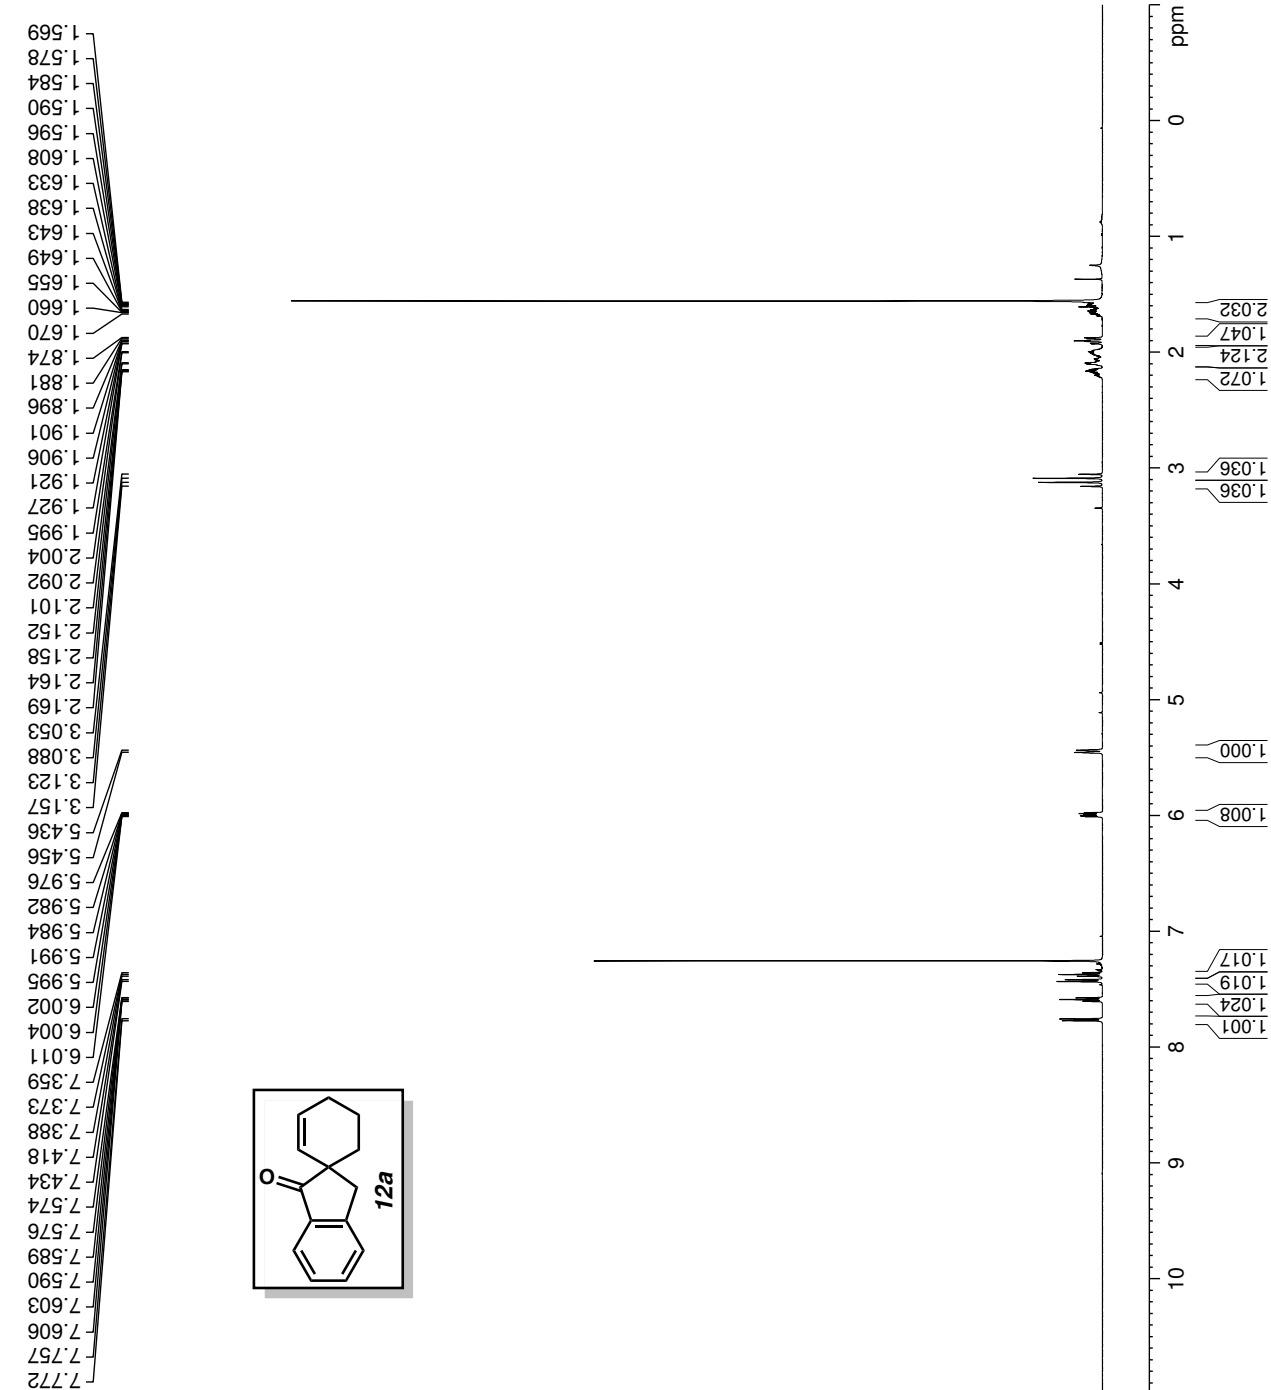

Current Data Parameters  
 NAME JM-5-019  
 EXPNO 300  
 PROCNO 1

F2 - Acquisition Parameters  
 Date 20170109  
 Time 18.22 h  
 INSTRUM av500  
 PROBHD Z119248\_0002 (  
 PULPROG zg30  
 TD 65536  
 SOLVENT CDCl3  
 NS 8  
 DS 0  
 SWH 10000.000 Hz  
 FIDRES 0.305176 Hz  
 AQ 3.2767999 sec  
 RG 12.14  
 DW 50.000 usec  
 DE 10.00 usec  
 TE 298.0 K  
 D1 2.00000000 sec  
 TD0 1  
 SFO1 500.1330008 MHz  
 NUC1 <sup>1</sup>H  
 P1 10.00 usec  
 PLW1 13.50000000 W

F2 - Processing parameters  
 SI 65536  
 SF 500.1300122 MHz  
 WDW EM  
 SSB 0  
 LB 0.30 Hz  
 GB 0  
 PC 1.00

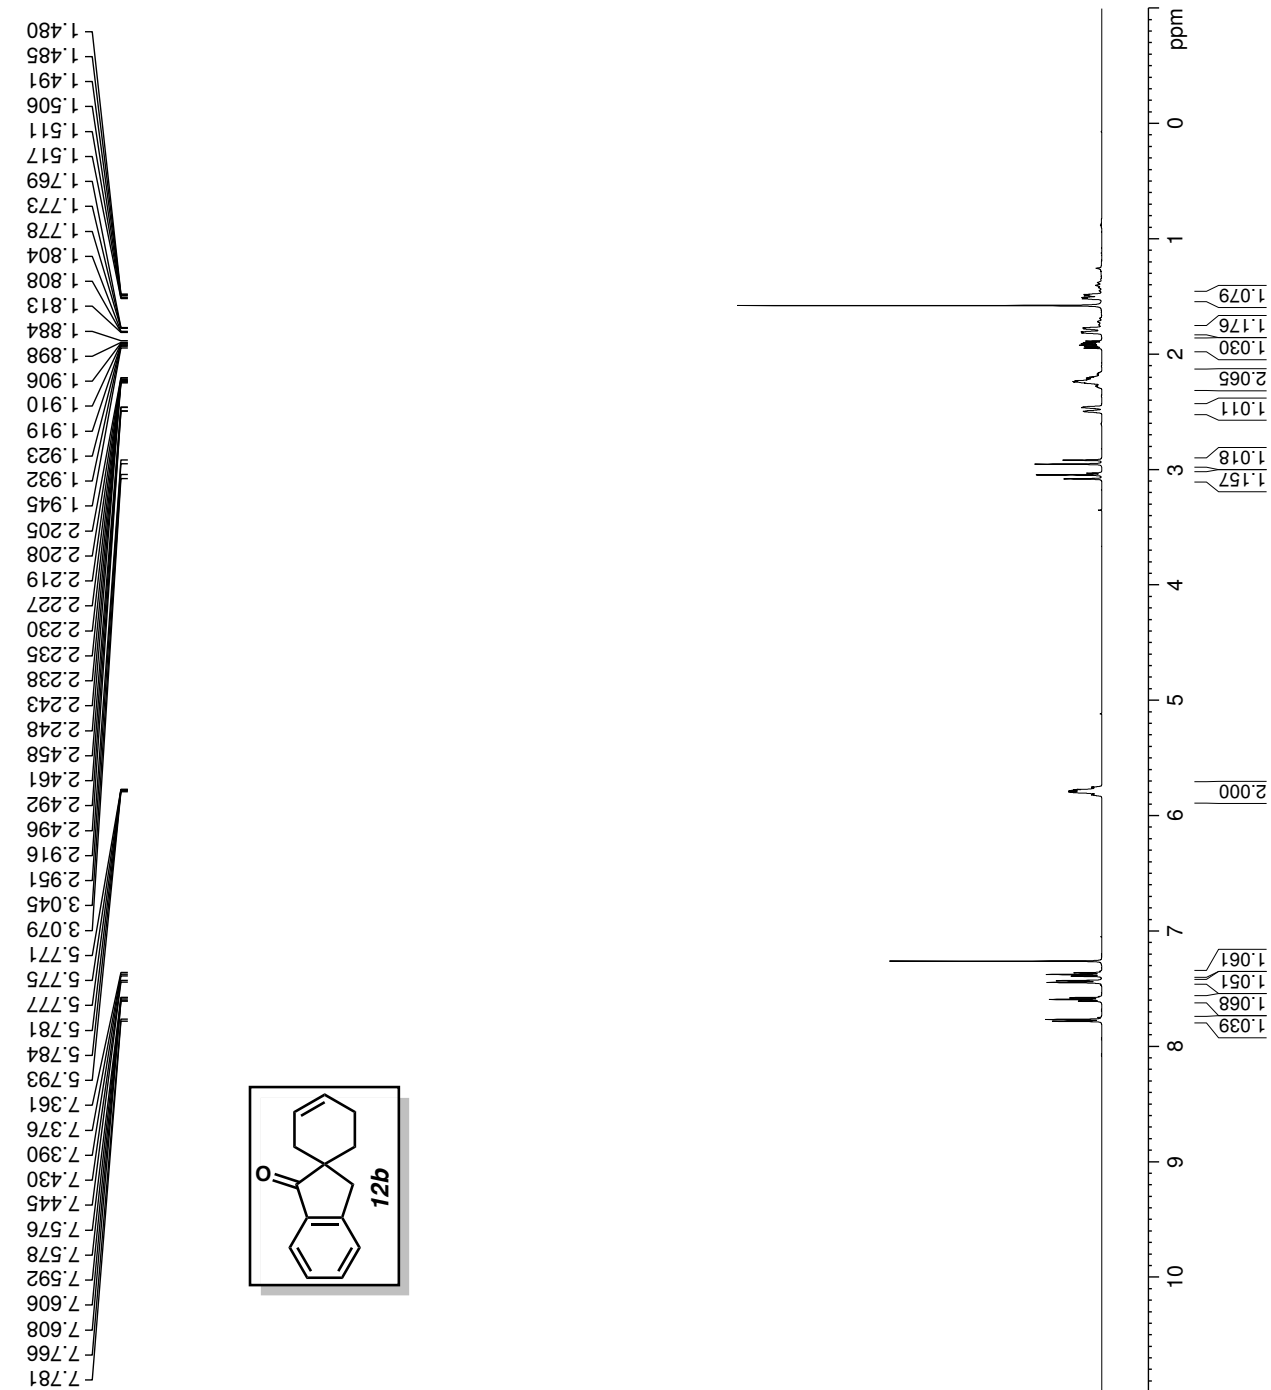



Current Data Parameters  
 NAME JMM-7-212(A1)  
 EXPNO 1  
 PROCNO 999

F2 - Acquisition Parameters  
 Date\_ 20161216  
 Time\_ 9.07  
 INSTRUM av500  
 PROBHD 5 mm DCH 13C-1  
 PULPROG zg30  
 TD 65536  
 SOLVENT CDCl3  
 NS 13  
 DS 0  
 SWH 10000.000 Hz  
 FIDRES 0.152588 Hz  
 AQ 3.2767999 sec  
 RG 12.14  
 DW 50.000 usec  
 DE 10.00 usec  
 TE 298.0 K  
 D1 2.00000000 sec  
 TD0 1

==== CHANNEL f1 =====  
 SFO1 500.1320005 MHz  
 NUC1 1H  
 P1 10.00 usec  
 PLW1 13.50000000 W

F2 - Processing parameters  
 SI 65536  
 SF 500.1300122 MHz  
 WDW EM  
 SSB 0  
 LB 0.30 Hz  
 GB 0  
 PC 1.00

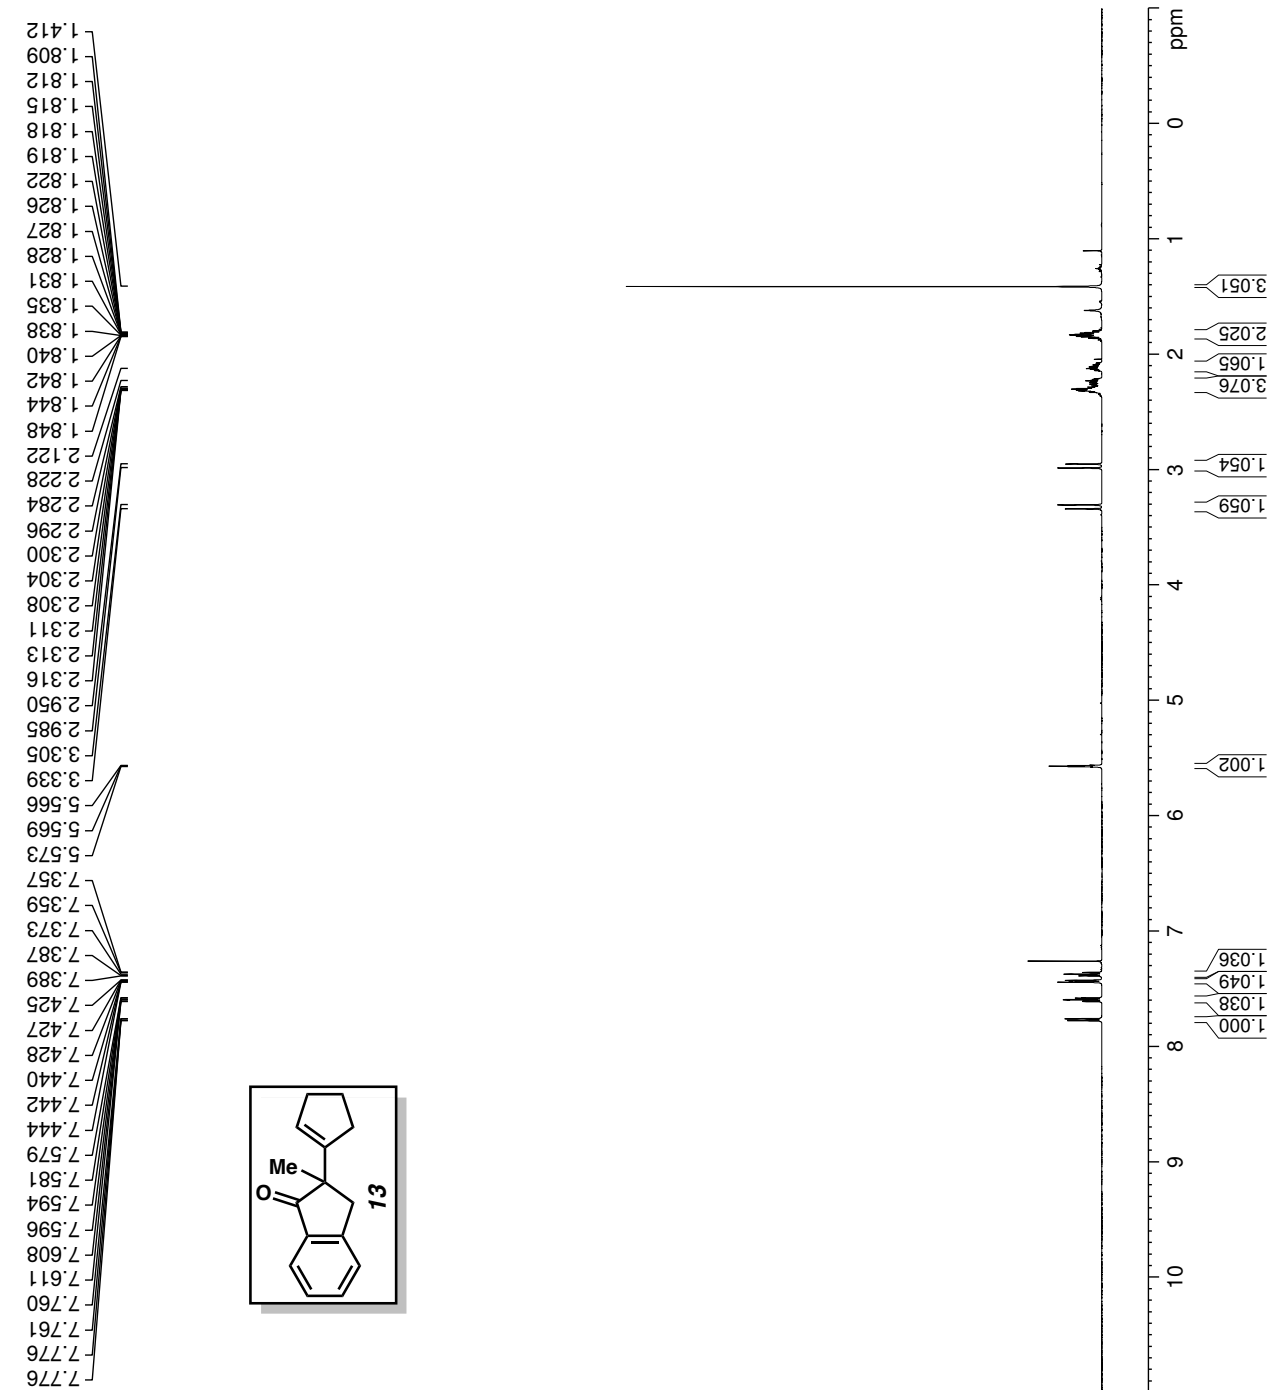

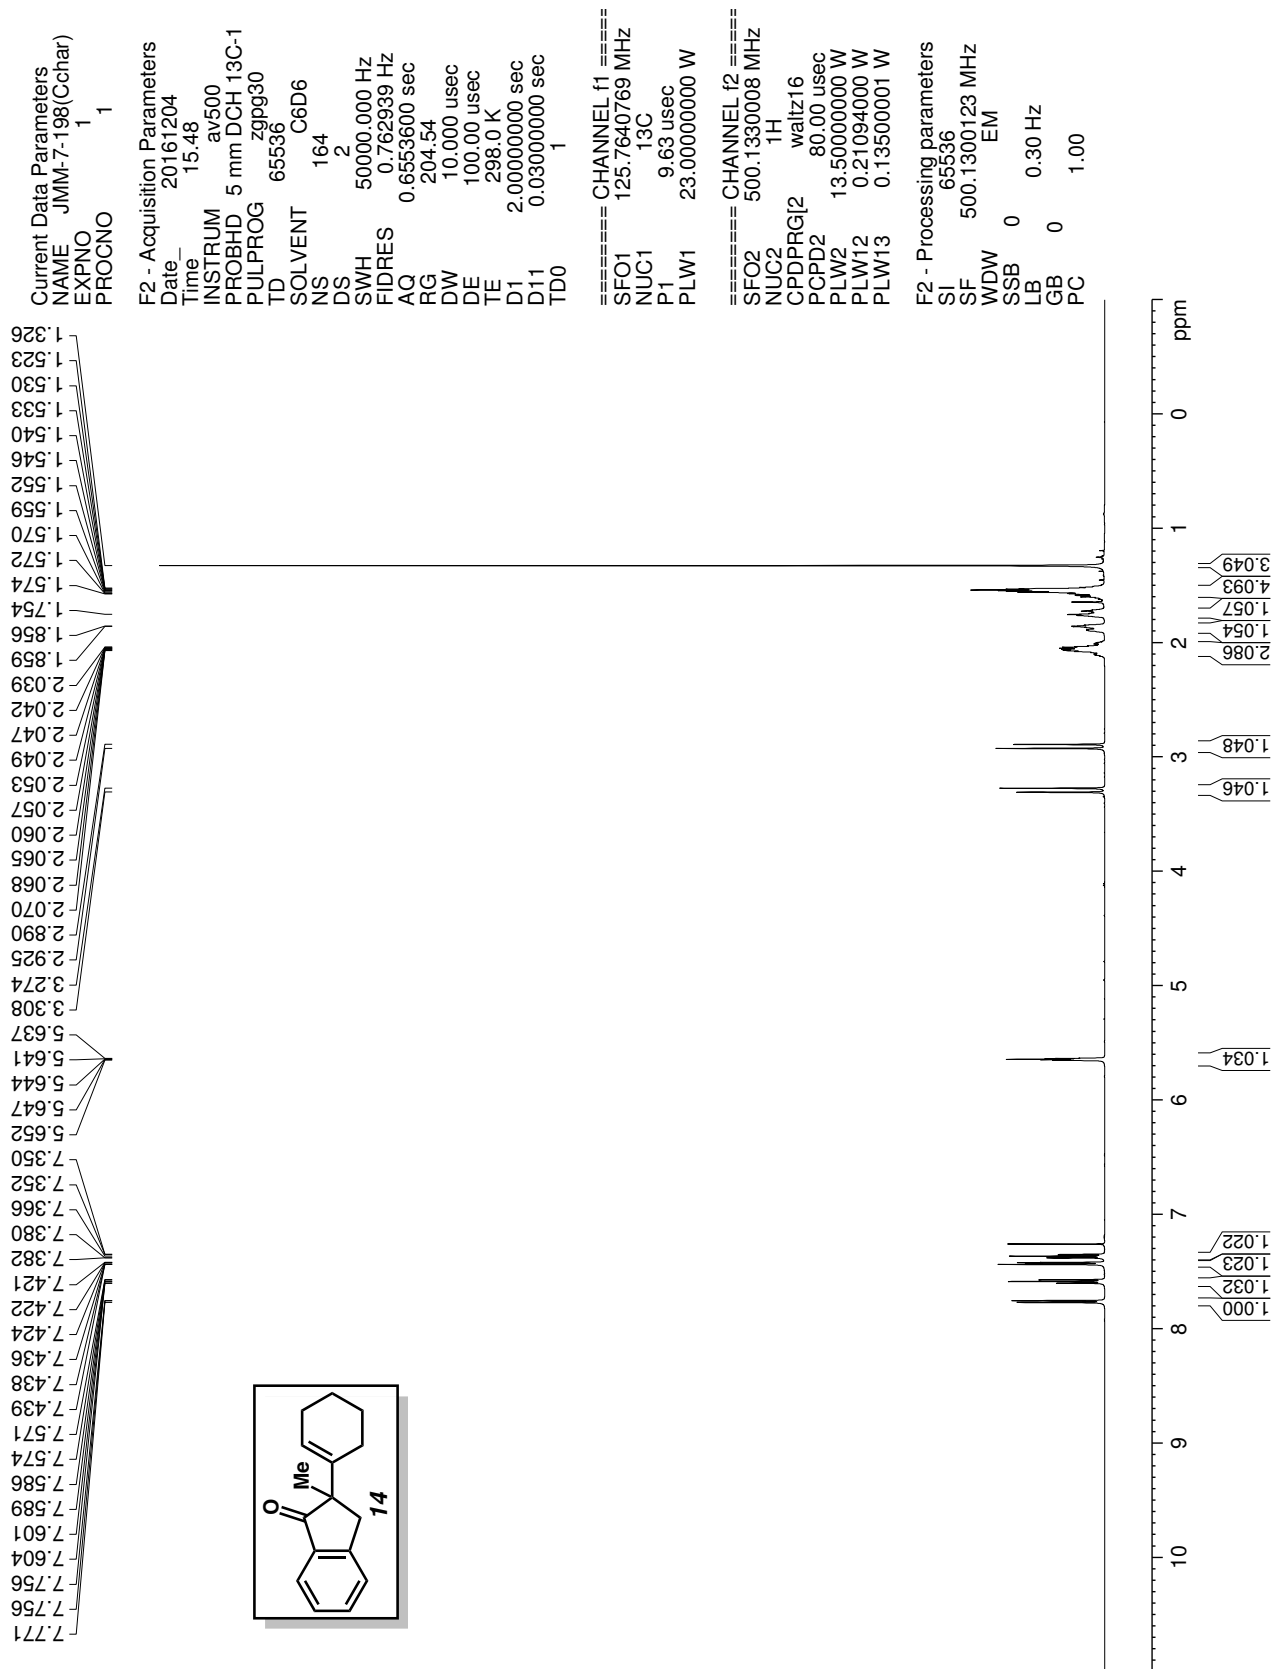

Current Data Parameters  
 NAME JMM-7-225-char  
 EXPNO 1  
 PROCNO 999

F2 - Acquisition Parameters  
 Date\_ 20170126  
 Time\_ 13.13  
 INSTRUM av500  
 PROBHD 5 mm DCH 13C-1  
 PULPROG zg30  
 TD 65536  
 SOLVENT CDCl3  
 NS 15  
 DS 0  
 SWH 10000.000 Hz  
 FIDRES 0.152588 Hz  
 AQ 3.2767999 sec  
 RG 12.14  
 DW 50.000 usec  
 DE 10.00 usec  
 TE 298.0 K  
 D1 2.00000000 sec  
 TD0 1

==== CHANNEL f1 =====  
 SFO1 500.1340010 MHz  
 NUC1 1H  
 P1 10.00 usec  
 PLW1 13.50000000 W

F2 - Processing parameters  
 SI 65536  
 SF 500.1300121 MHz  
 WDW EM  
 SSB 0  
 LB 0.30 Hz  
 GB 0  
 PC 1.00

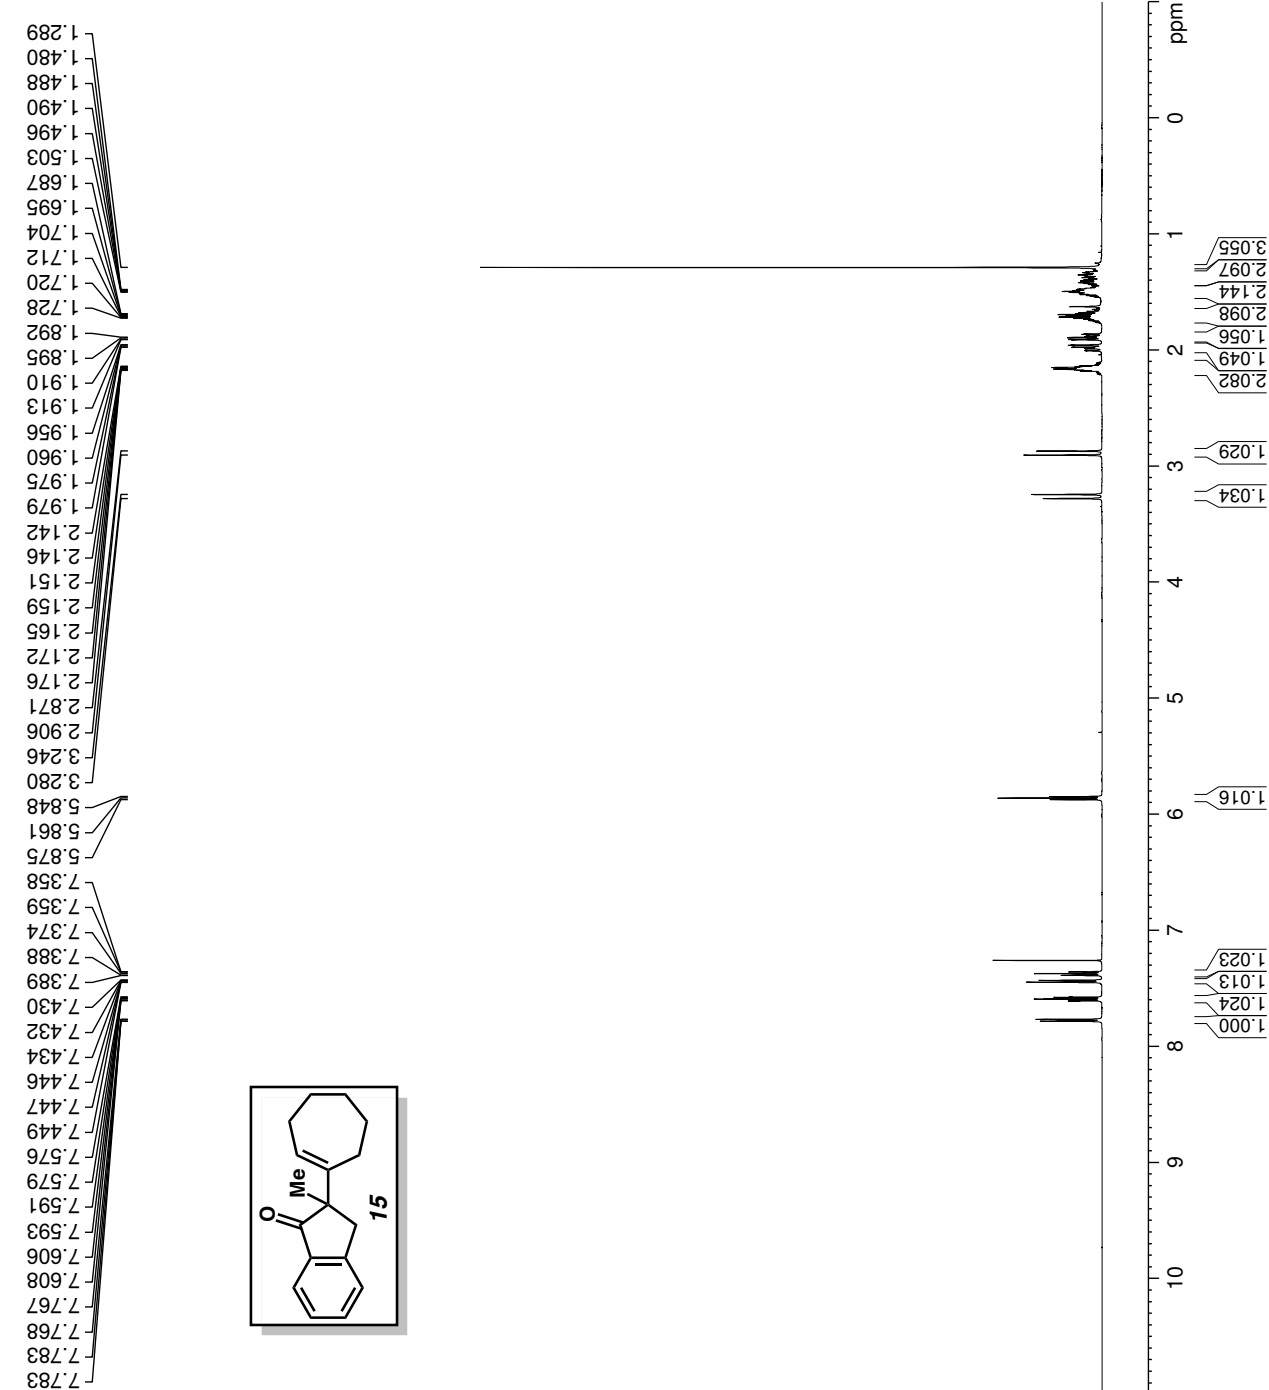

Current Data Parameters  
 NAME JM-4-292  
 EXPNO 450  
 PROCNO 1

F2 - Acquisition Parameters  
 Date\_ 20161206  
 Time\_ 21:19  
 INSTRUM av400  
 PROBHD 5 mm PABBO BB/  
 PULPROG zg30  
 TD 52882  
 SOLVENT CDCl3  
 NS 96  
 DS 0  
 SWH 8012.820 Hz  
 FIDRES 0.151523 Hz  
 AQ 3.2998369 sec  
 RG 189.85  
 DW 62.400 usec  
 DE 6.50 usec  
 TE 299.0 K  
 D1 2.0000000 sec  
 TD0 1

==== CHANNEL f1 =====  
 SFO1 400.1324008 MHz  
 NUC1 1H  
 P1 15.00 usec  
 PLW1 13.00000000 W

F2 - Processing parameters  
 SI 65536  
 SF 400.1300175 MHz  
 WDW EM  
 SSB 0  
 LB 0  
 GB 0  
 PC 1.00

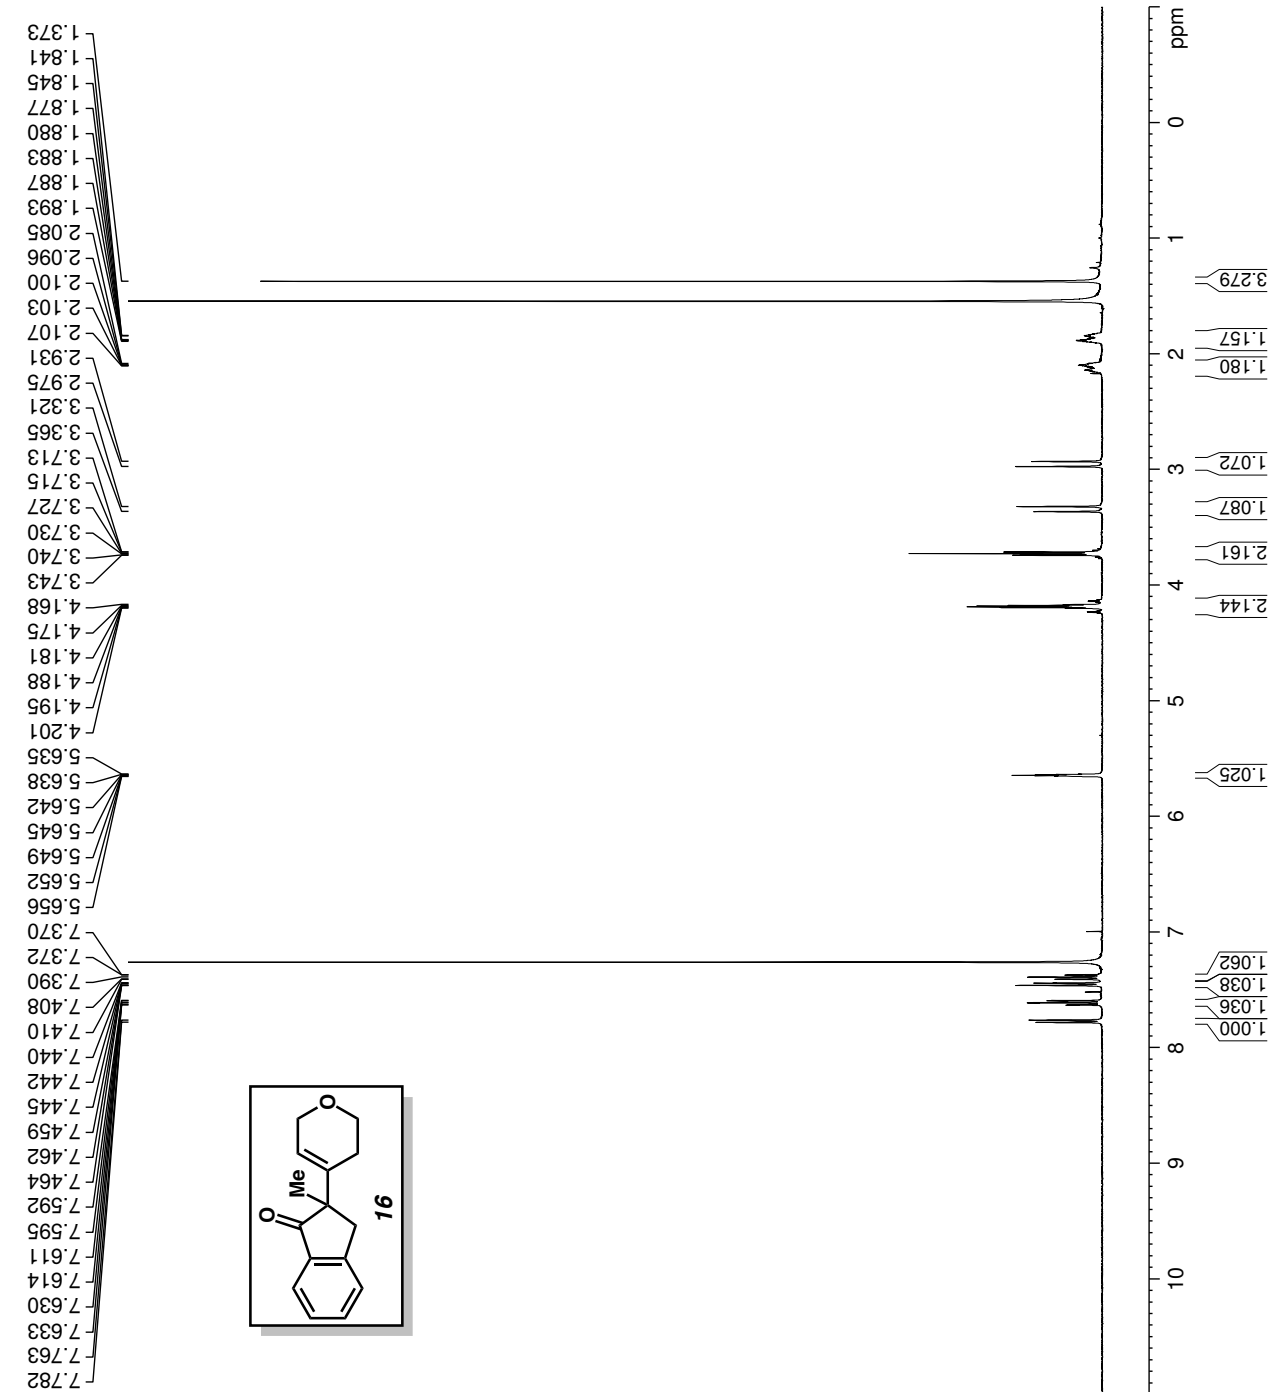

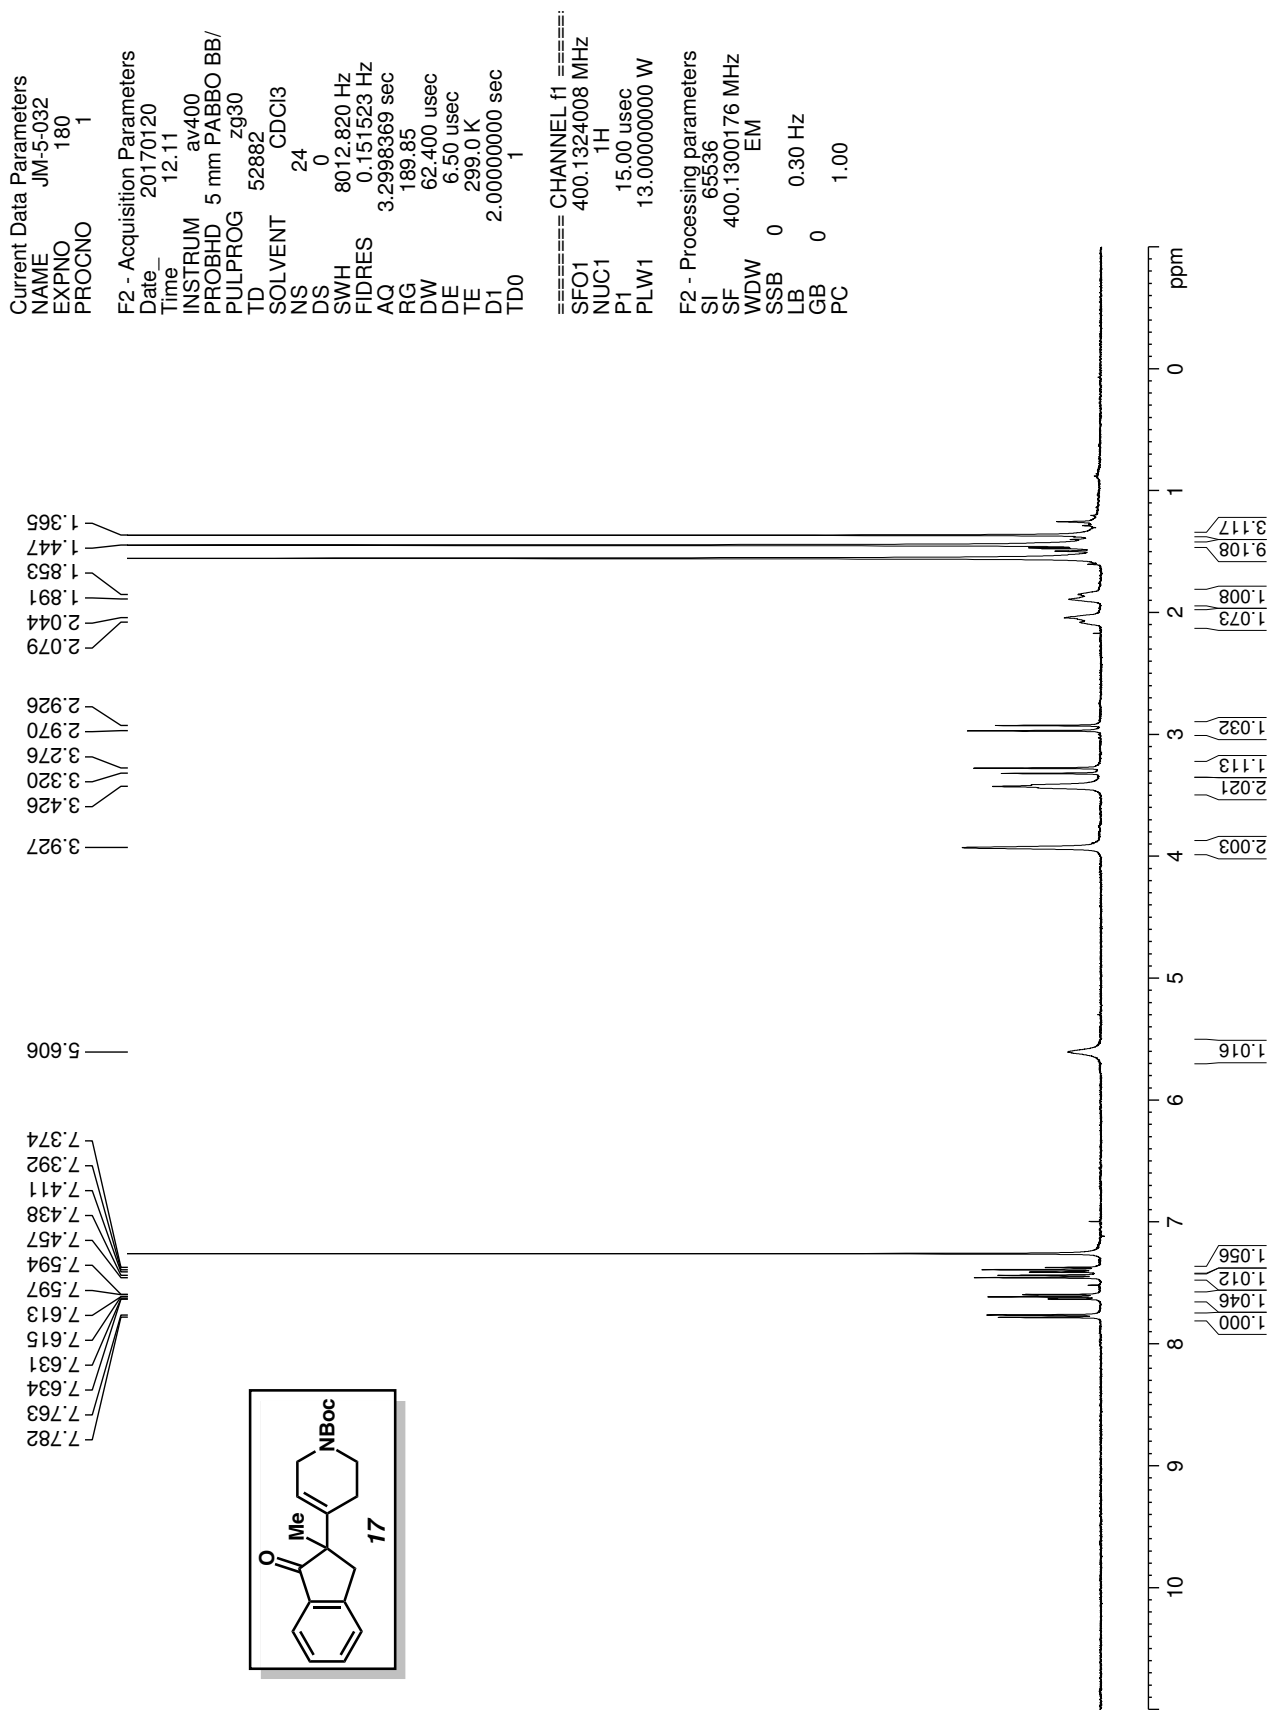

Current Data Parameters  
 NAME JM-5-067  
 EXPNO 200  
 PROCNO 1

F2 - Acquisition Parameters  
 Date\_ 20170217  
 Time\_ 18.15 h  
 INSTRUM av500  
 PROBHD Z119248\_0002 ( )  
 PULPROG zg30  
 TD 65536  
 SOLVENT CDCl3  
 NS 8  
 DS 0  
 SWH 10000.000 Hz  
 FIDRES 0.305176 Hz  
 AQ 3.2767999 sec  
 RG 21.37  
 DW 50.000 usec  
 DE 10.00 usec  
 TE 298.0 K  
 D1 2.00000000 sec  
 TD0 1  
 SFO1 500.1330008 MHz  
 NUC1 <sup>1</sup>H  
 P1 10.00 usec  
 PLW1 13.50000000 W

F2 - Processing parameters  
 SI 65536  
 SF 500.1300125 MHz  
 WDW EM  
 SSB 0  
 LB 0  
 GB 0  
 PC 1.00

1.651  
1.650  
1.648  
1.647  
1.377

3.305  
3.271  
2.929  
2.894  
2.892

4.950  
4.948  
4.945  
4.938

7.426  
7.420  
7.415  
7.415  
7.411  
7.405  
7.400  
7.340  
7.335  
7.323  
7.318  
7.306  
7.301

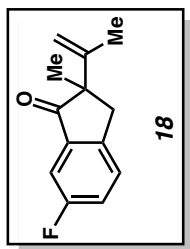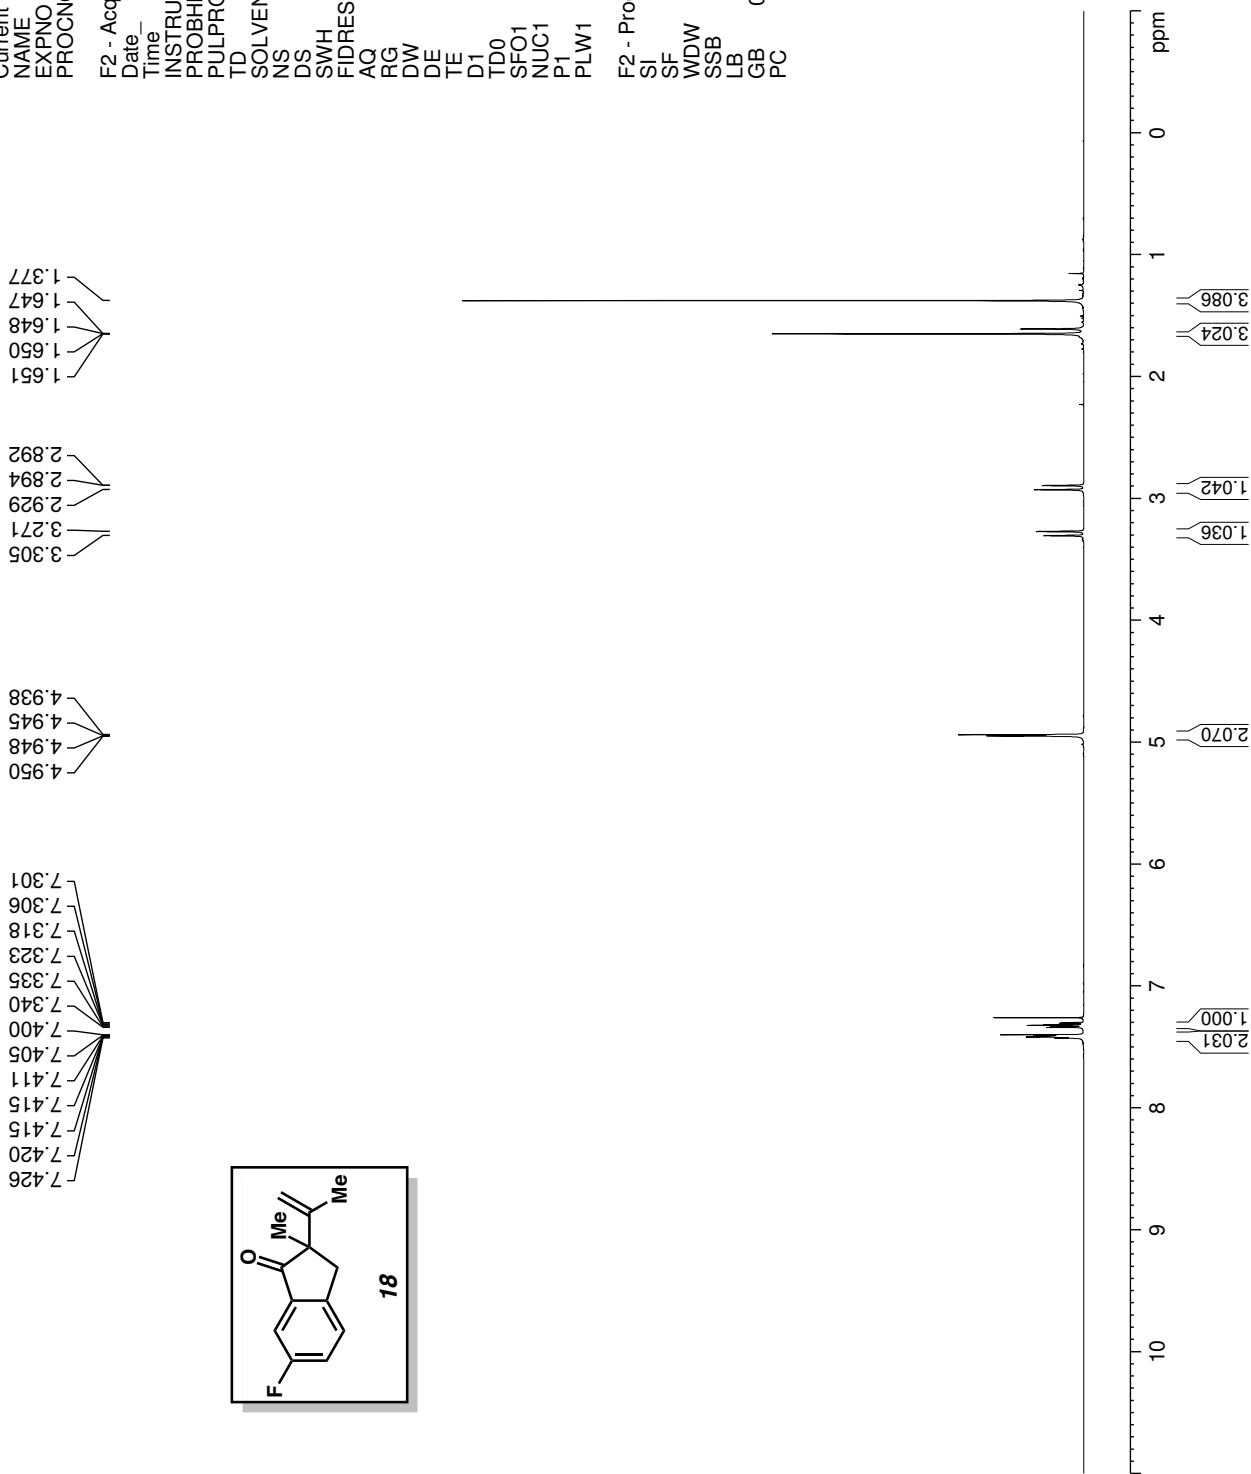

Current Data Parameters  
 NAME JM-5-057  
 EXPNO 100  
 PROCNO 1

F2 - Acquisition Parameters  
 Date 20170206  
 Time 19:24 h  
 INSTRUM av500  
 PROBHD Z119248\_0002 (  
 PULPROG zg30  
 TD 65536  
 SOLVENT CDCl3  
 NS 8  
 DS 0  
 SWH 10000.000 Hz  
 FIDRES 0.305176 Hz  
 AQ 3.2767999 sec  
 RG 26.59  
 DW 50.000 usec  
 DE 10.00 usec  
 TE 298.0 K  
 D1 2.00000000 sec  
 TD0 1  
 SFO1 500.1330008 MHz  
 NUC1 <sup>1</sup>H  
 P1 10.00 usec  
 PLW1 13.50000000 W

F2 - Processing parameters  
 SI 65536  
 SF 500.1300123 MHz  
 WDW EM  
 SSB 0  
 LB 0  
 GB 0  
 PC 1.00

1.399  
 1.668  
 1.669

2.997  
 3.032  
 3.382  
 3.418

4.954  
 4.971  
 4.974  
 4.976

7.582  
 7.598  
 7.842  
 7.844  
 7.858  
 7.860  
 8.051

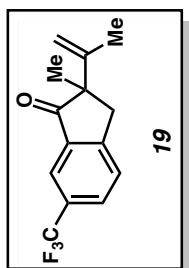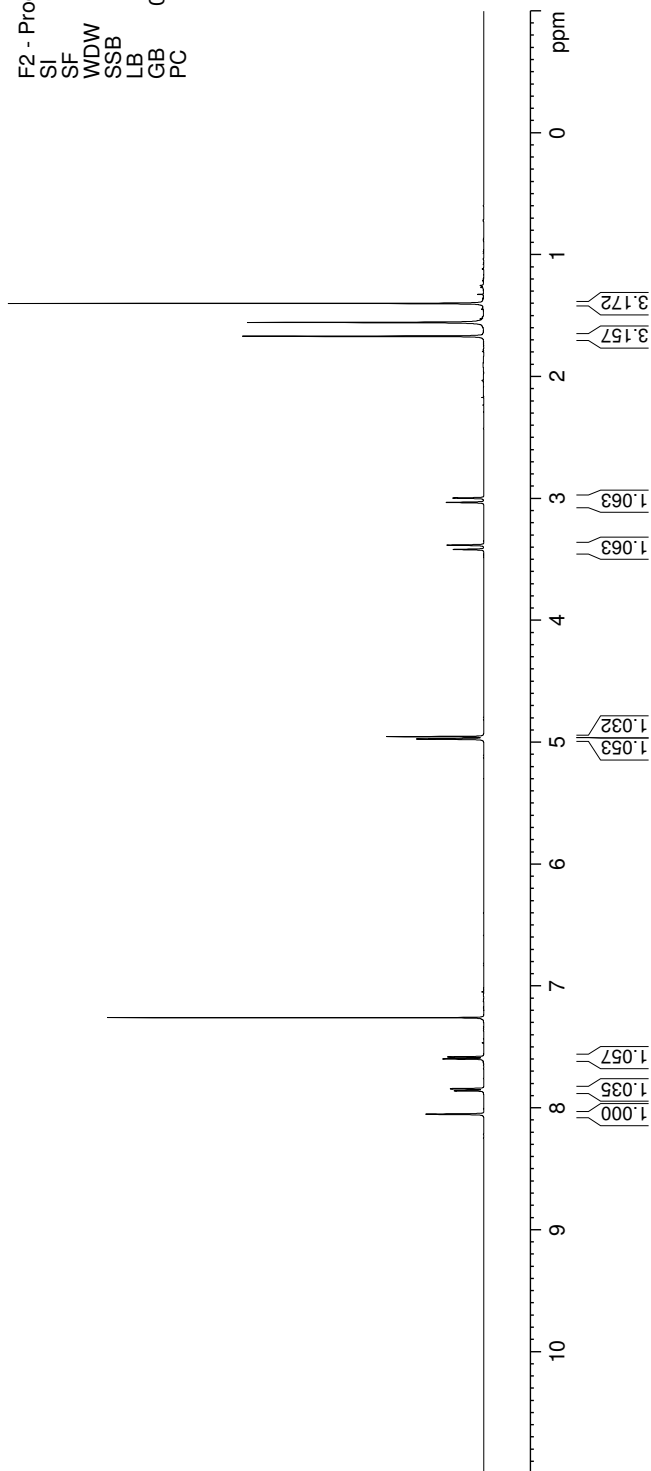

Current Data Parameters  
 NAME sr-1-105.500  
 EXPNO 1  
 PROCNO 1

F2 - Acquisition Parameters  
 Date\_ 20170203  
 Time\_ 9.00 h  
 INSTRUM av500  
 PROBHD Z119248\_0002 ( zg30  
 PULPROG zg30  
 TD 65536  
 SOLVENT CDC13  
 NS 8  
 DS 0  
 SWH 10000.000 Hz  
 FIDRES 0.305176 Hz  
 AQ 3.2767999 sec  
 RG 12.14  
 DW 50.000 usec  
 DE 10.00 usec  
 TE 298.0 K  
 D1 2.00000000 sec  
 TD0 1  
 SFO1 500.1330008 MHz  
 NUC1 1H  
 P1 10.00 usec  
 PLW1 13.50000000 W

F2 - Processing parameters  
 SI 65536  
 SF 500.1299930 MHz  
 WDW EM  
 SSB 0  
 LB 0 0.30 Hz  
 GB 0  
 PC 1.00

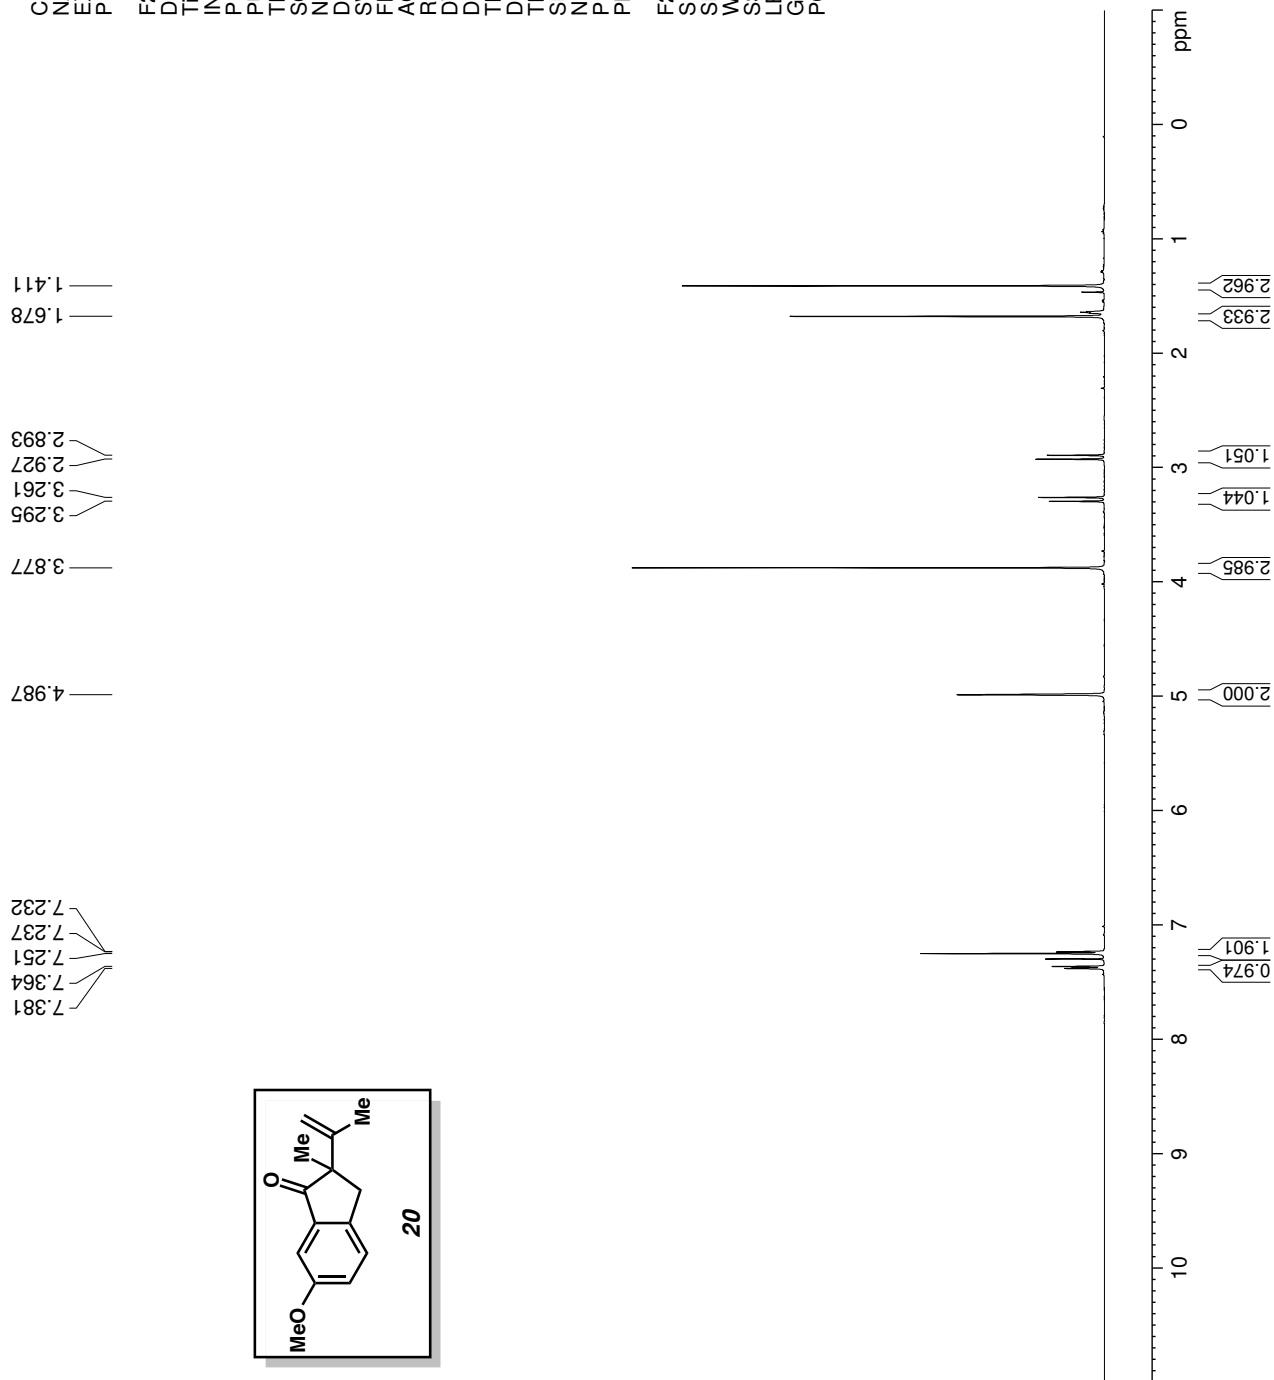



Current Data Parameters  
 NAME sr-1-131.500  
 EXPNO 1  
 PROCNO 1

F2 - Acquisition Parameters  
 Date\_ 20170217  
 Time\_ 11.12 h  
 INSTRUM av500  
 PROBHD Z119248\_0002 ( z930  
 PULPROG zg30  
 TD 65536  
 SOLVENT CDCl3  
 NS 8  
 DS 0  
 SWH 10000.000 Hz  
 FIDRES 0.305176 Hz  
 AQ 3.2767999 sec  
 RG 23.34  
 DW 50.000 usec  
 DE 10.00 usec  
 TE 298.0 K  
 D1 2.00000000 sec  
 TD0 1  
 SFO1 500.1330008 MHz  
 NUC1 1H  
 P1 10.00 usec  
 PLW1 13.50000000 W

F2 - Processing parameters  
 SI 65536  
 SF 500.1300147 MHz  
 WDW EM  
 SSB 0  
 LB 0  
 GB 0  
 PC 1.00

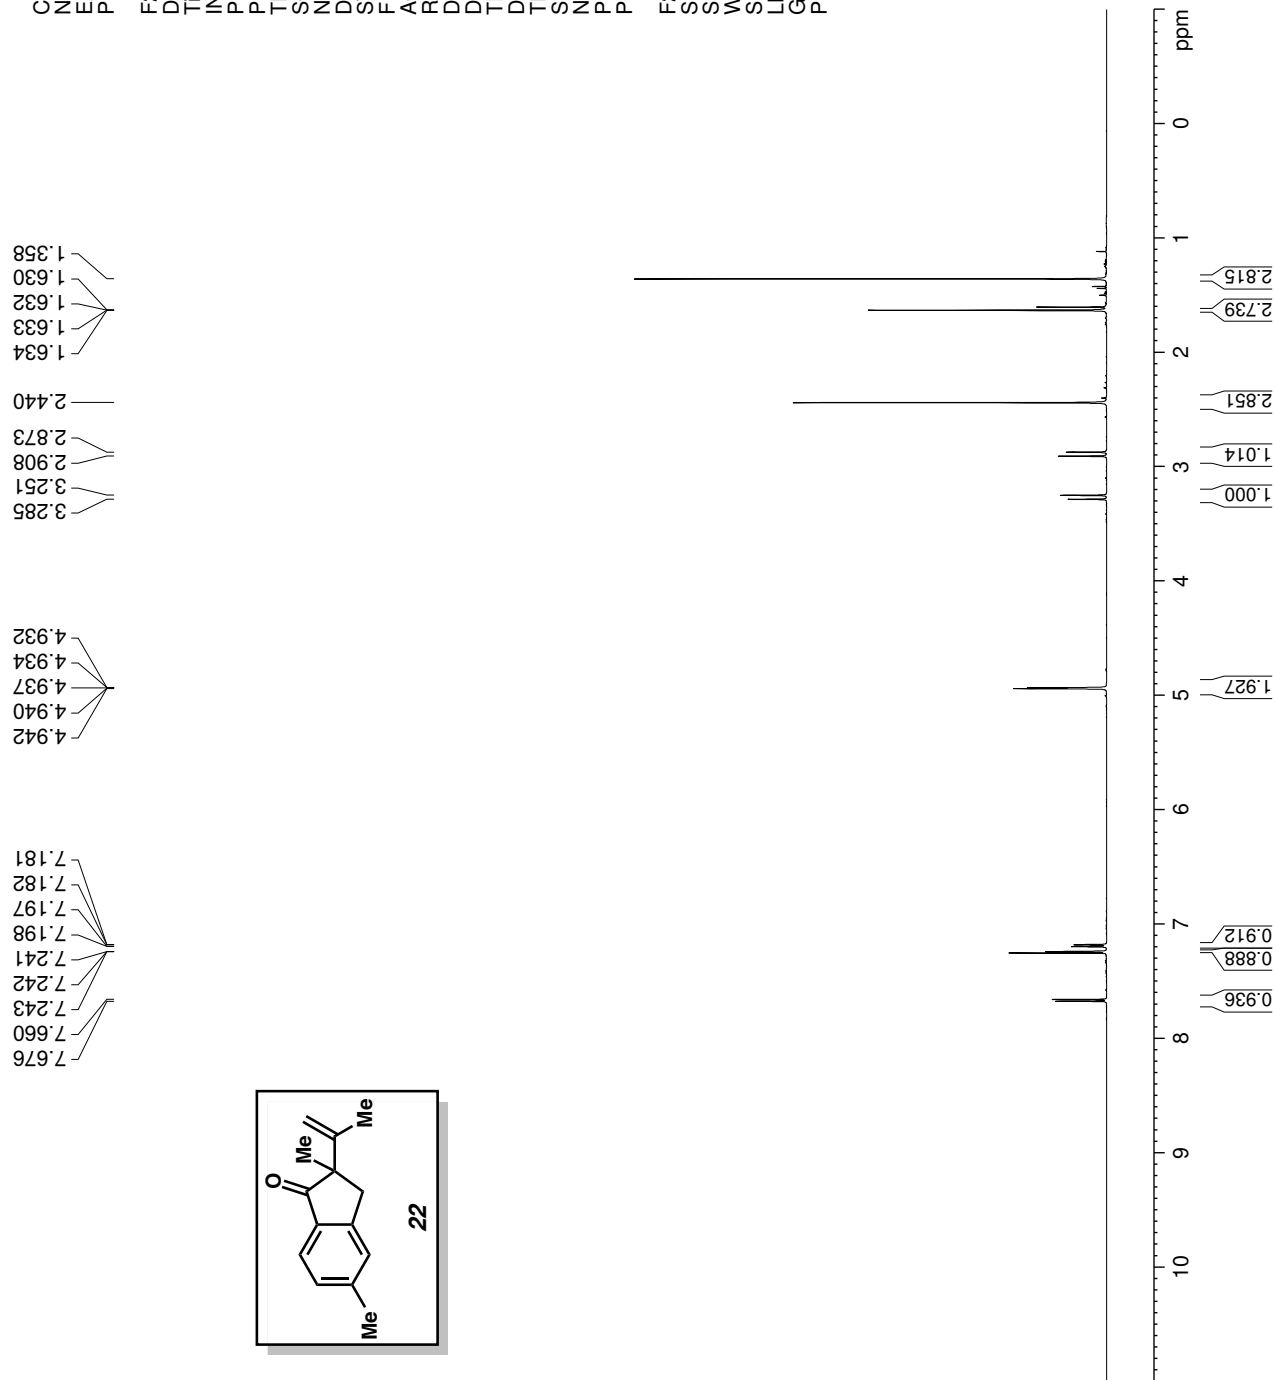

Current Data Parameters  
 NAME sr-1-112.500.11  
 EXPNO 1  
 PROCNO 1

F2 - Acquisition Parameters  
 Date\_ 20170208  
 Time\_ 16.10 h  
 INSTRUM av500  
 PROBHD Z119248\_0002 (z930)  
 PULPROG zg30  
 TD 65536  
 SOLVENT CDCl3  
 NS 8  
 DS 0  
 SWH 10000.000 Hz  
 FIDRES 0.305176 Hz  
 AQ 3.2767999 sec  
 RG 12.14  
 DW 50.000 usec  
 DE 10.00 usec  
 TE 298.0 K  
 D1 2.00000000 sec  
 TD0 1  
 SFO1 500.1330008 MHz  
 NUC1 1H  
 P1 10.00 usec  
 PLW1 13.50000000 W

F2 - Processing parameters  
 SI 65536  
 SF 500.1300087 MHz  
 WDW EM  
 SSB 0  
 LB 0  
 GB 0  
 PC 1.00

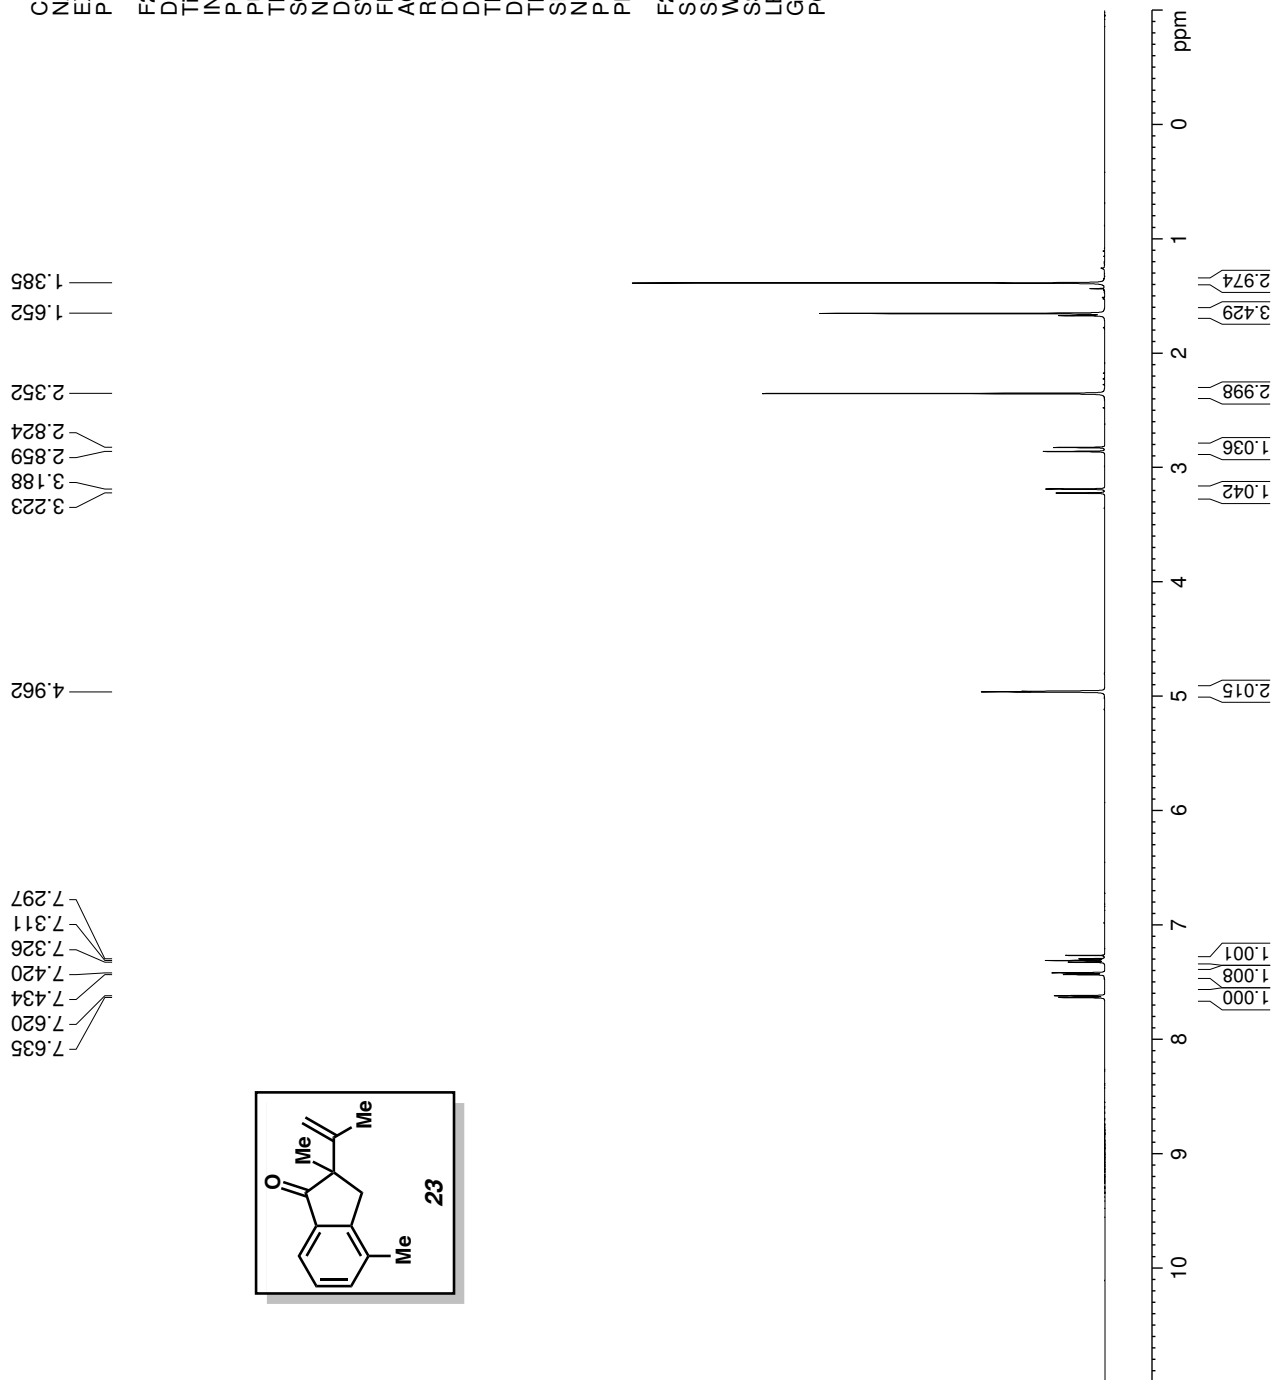

Current Data Parameters  
 NAME JMM-7-244-char  
 EXPNO 1  
 PROCNO 999

F2 - Acquisition Parameters  
 Date\_ 20170215  
 Time\_ 16.30  
 INSTRUM av500  
 PROBHD 5 mm DCH 13C-1  
 PULPROG zg30  
 TD 65536  
 SOLVENT CDCl3  
 NS 29  
 DS 0  
 SWH 10000.000 Hz  
 FIDRES 0.152588 Hz  
 AQ 3.2767999 sec  
 RG 12.14  
 DW 50.000 usec  
 DE 10.00 usec  
 TE 298.0 K  
 D1 2.00000000 sec  
 TD0 1

==== CHANNEL f1 =====  
 SFO1 500.1340010 MHz  
 NUC1 1H  
 P1 10.00 usec  
 PLW1 13.50000000 W

F2 - Processing parameters  
 SI 65536  
 SF 500.1300123 MHz  
 WDW EM  
 SSB 0  
 LB 0  
 GB 0  
 PC 1.00

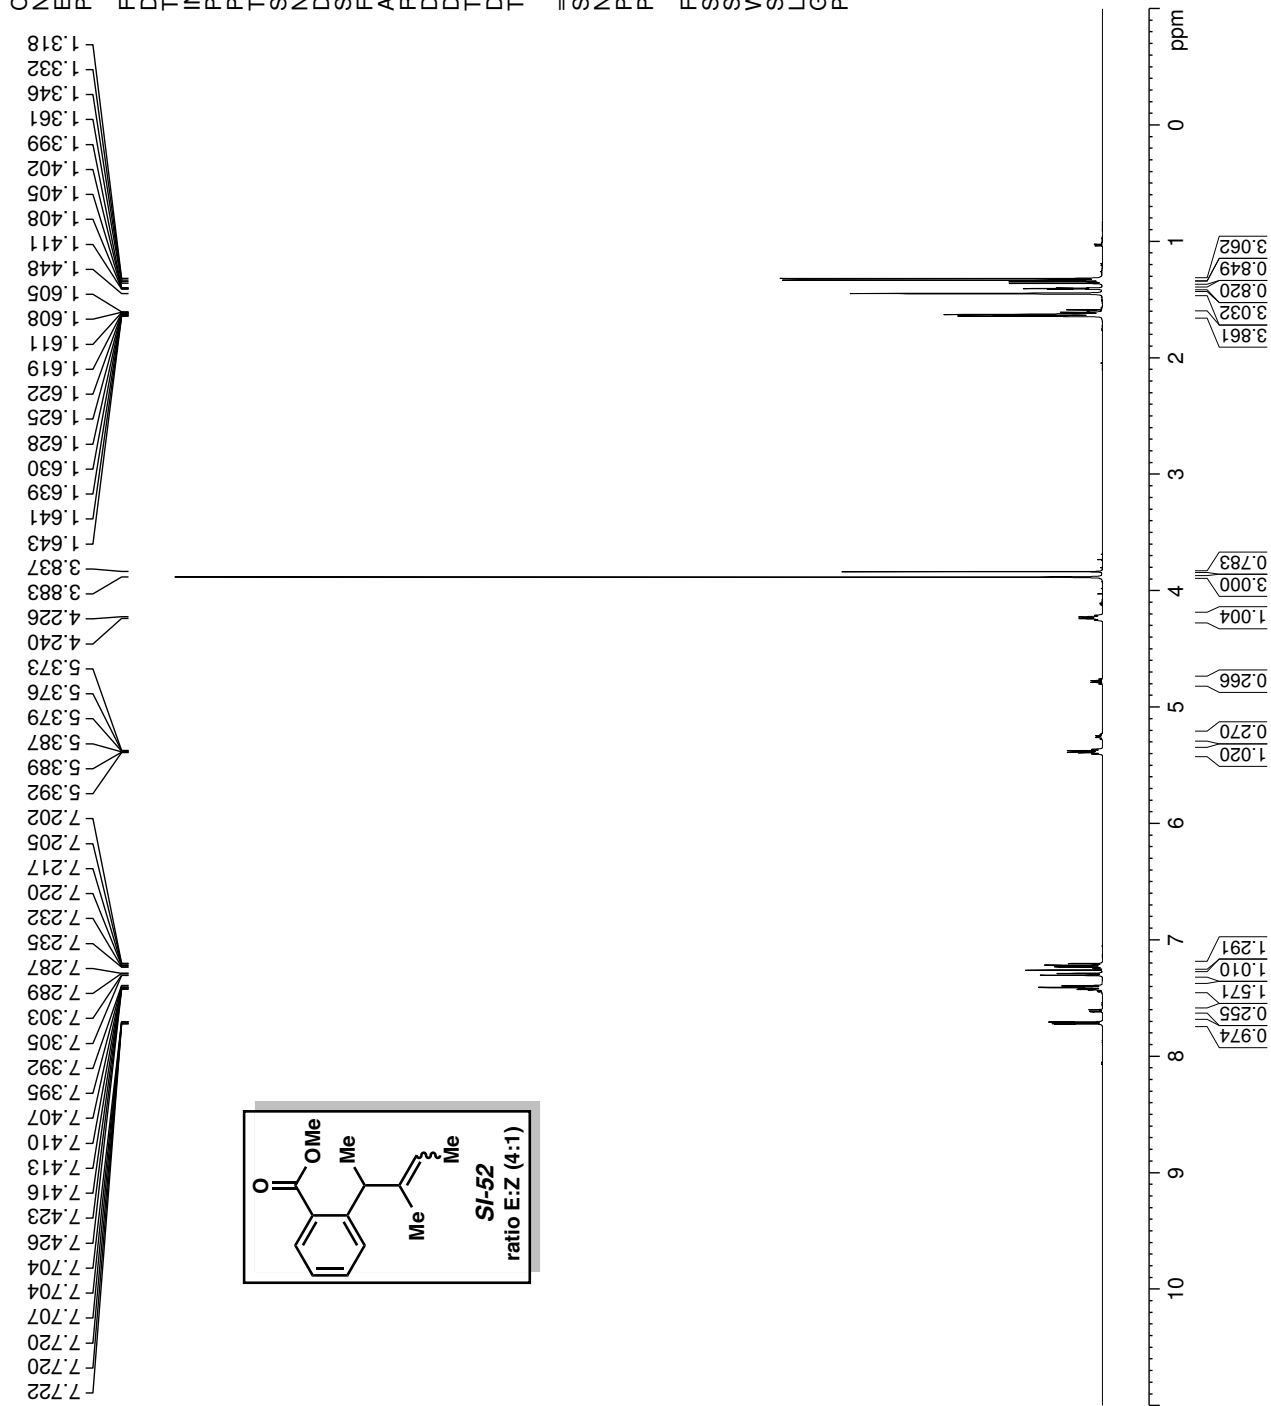

Current Data Parameters  
 NAME JMM-7-247--char  
 EXPNO 1  
 PROCNO 999

F2 - Acquisition Parameters  
 Date\_ 20170215  
 Time\_ 16.12  
 INSTRUM av500  
 PROBDH 5 mm DCH 13C-1  
 PULPROG zg30  
 TD 65536  
 SOLVENT CDCl3  
 NS 17  
 DS 0  
 SWH 10000.000 Hz  
 FIDRES 0.152588 Hz  
 AQ 3.2767999 sec  
 RG 12.14  
 DW 50.000 usec  
 DE 10.00 usec  
 TE 298.0 K  
 D1 2.0000000 sec  
 TD0 1

==== CHANNEL f1 =====  
 SFO1 500.1340010 MHz  
 NUJC1 1H  
 P1 10.00 usec  
 PLW1 13.50000000 W

F2 - Processing parameters  
 SI 65536  
 SF 500.1300121 MHz  
 WDW EM  
 SSB 0 0.30 Hz  
 LB 0  
 GB 0  
 PC 1.00

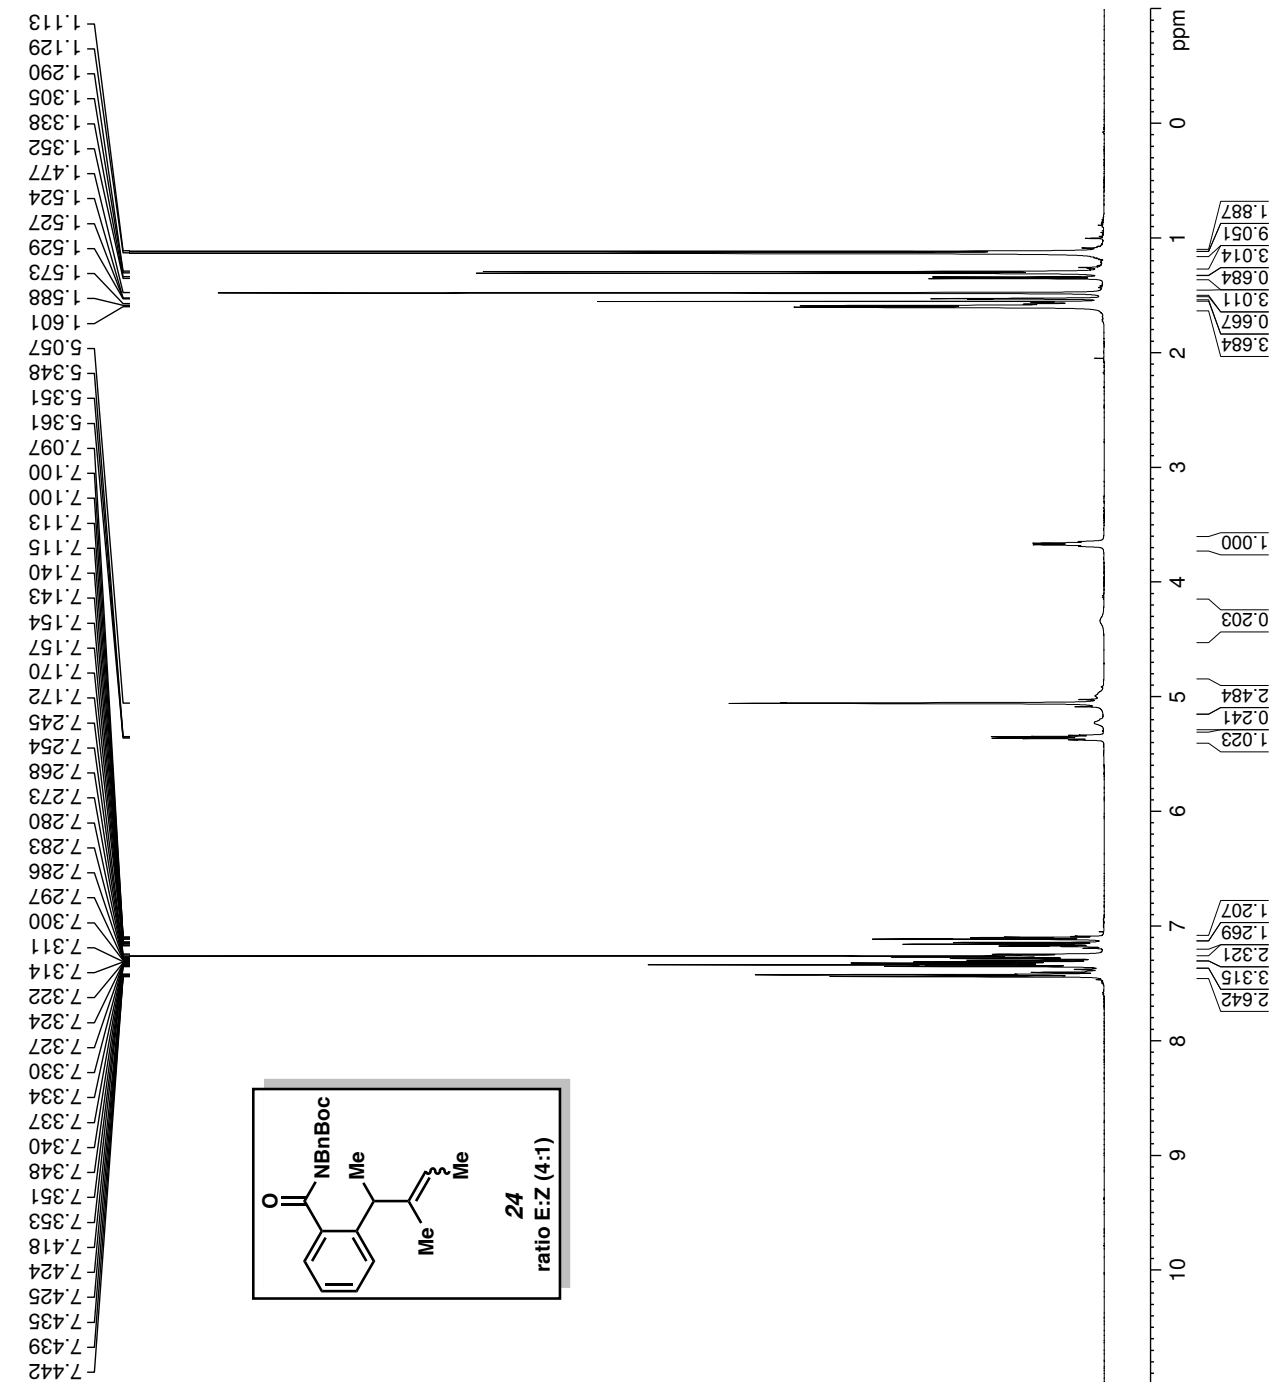

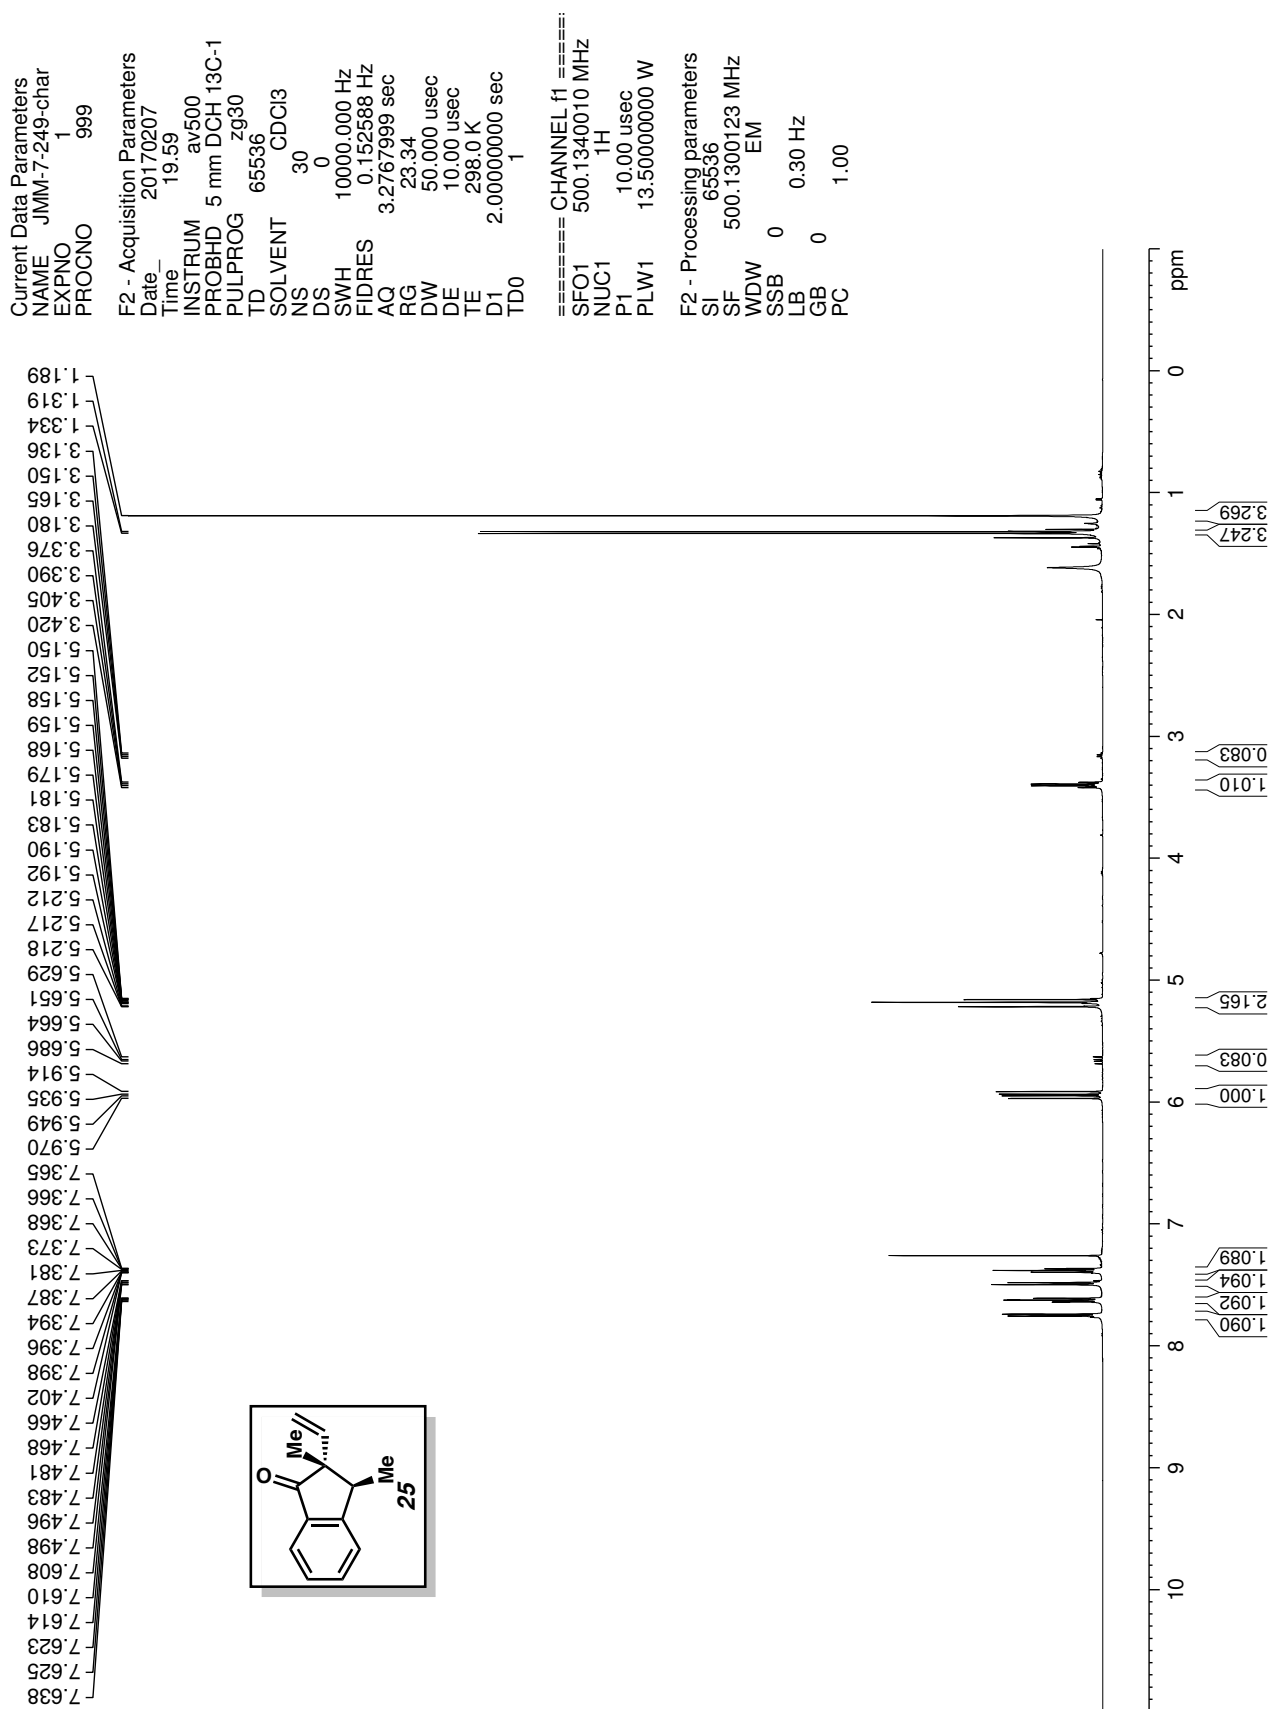

**<sup>13</sup>C NMR Spectra:**

Current Data Parameters  
 NAME JM-5-073  
 EXPNO 2  
 PROCNO 1

F2 - Acquisition Parameters  
 Date\_ 20170217  
 Time 18.26 h  
 INSTRUM av500  
 PROBHD Z119248\_0002 (zpgpg30)  
 PULPROG zpgpg30  
 TD 65536  
 SOLVENT CDC13  
 NS 8  
 DS 2  
 SWH 31250.000 Hz  
 FIDRES 0.953674 Hz  
 AQ 1.0485760 sec  
 RG 204.54  
 DW 16.000 usec  
 DE 18.00 usec  
 TE 298.0 K  
 D1 2.0000000 sec  
 D11 0.030000000 sec  
 TD0 1  
 SFO1 125.7722511 MHz  
 NUC1 <sup>13</sup>C  
 P1 10.50 usec  
 PLW1 23.0000000 W  
 SFO2 500.1330008 MHz  
 NUC2 <sup>1</sup>H  
 CPDPRG2 waltz16  
 PCPD2 80.00 usec  
 PLW2 13.5000000 W  
 PLW12 0.21094000 W  
 PLW13 0.10610000 W

F2 - Processing parameters  
 SI 131072  
 SF 125.757764 MHz  
 WDW EM  
 SSB 0  
 LB 1.00 Hz  
 GB 0  
 PC 1.40

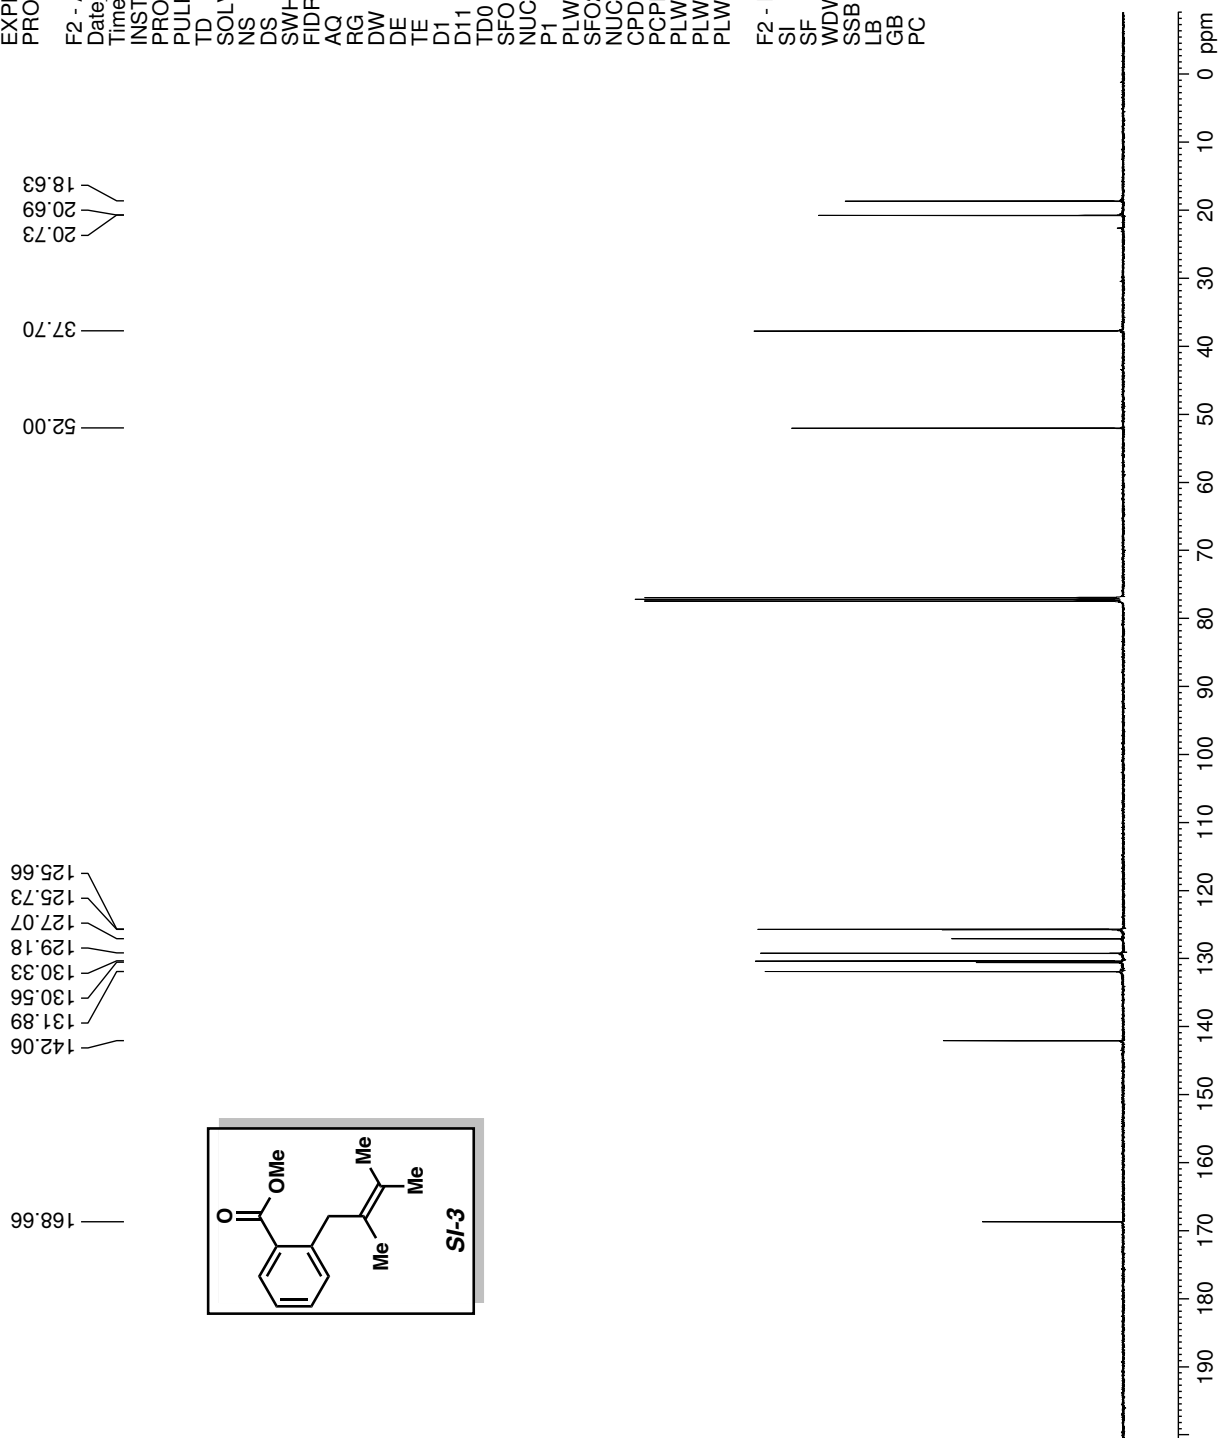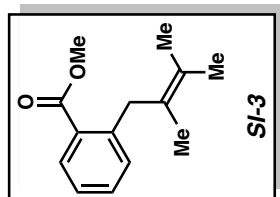

Current Data Parameters  
 NAME SR-1-017  
 EXPNO 2  
 PROCNO 1

F2 - Acquisition Parameters  
 Date\_ 20170109  
 Time 18.04 h  
 INSTRUM av500  
 PROBHD Z119248\_0002 (  
 PULPROG zgpg30  
 TD 65536  
 SOLVENT CDCl3  
 NS 17  
 DS 2  
 SWH 31250.000 Hz  
 FIDRES 0.953674 Hz  
 AQ 1.0485760 sec  
 RG 204.54  
 DW 16.000 usec  
 DE 18.00 usec  
 TE 298.0 K  
 D1 2.00000000 sec  
 D11 0.03000000 sec  
 TD0 1  
 SFO1 125.7722511 MHz  
 NUC1 13C  
 P1 10.50 usec  
 PLW1 23.00000000 W  
 SFO2 500.1330008 MHz  
 NUC2 1H  
 CPDPRG2 waltz16  
 PCPD2 80.00 usec  
 PLW2 13.50000000 W  
 PLW12 0.21094000 W  
 PLW13 0.10610000 W

F2 - Processing parameters  
 SI 131072  
 SF 125.7577730 MHz  
 WDW EM  
 SSB 0  
 LB 0  
 GB 0  
 PC 1.40

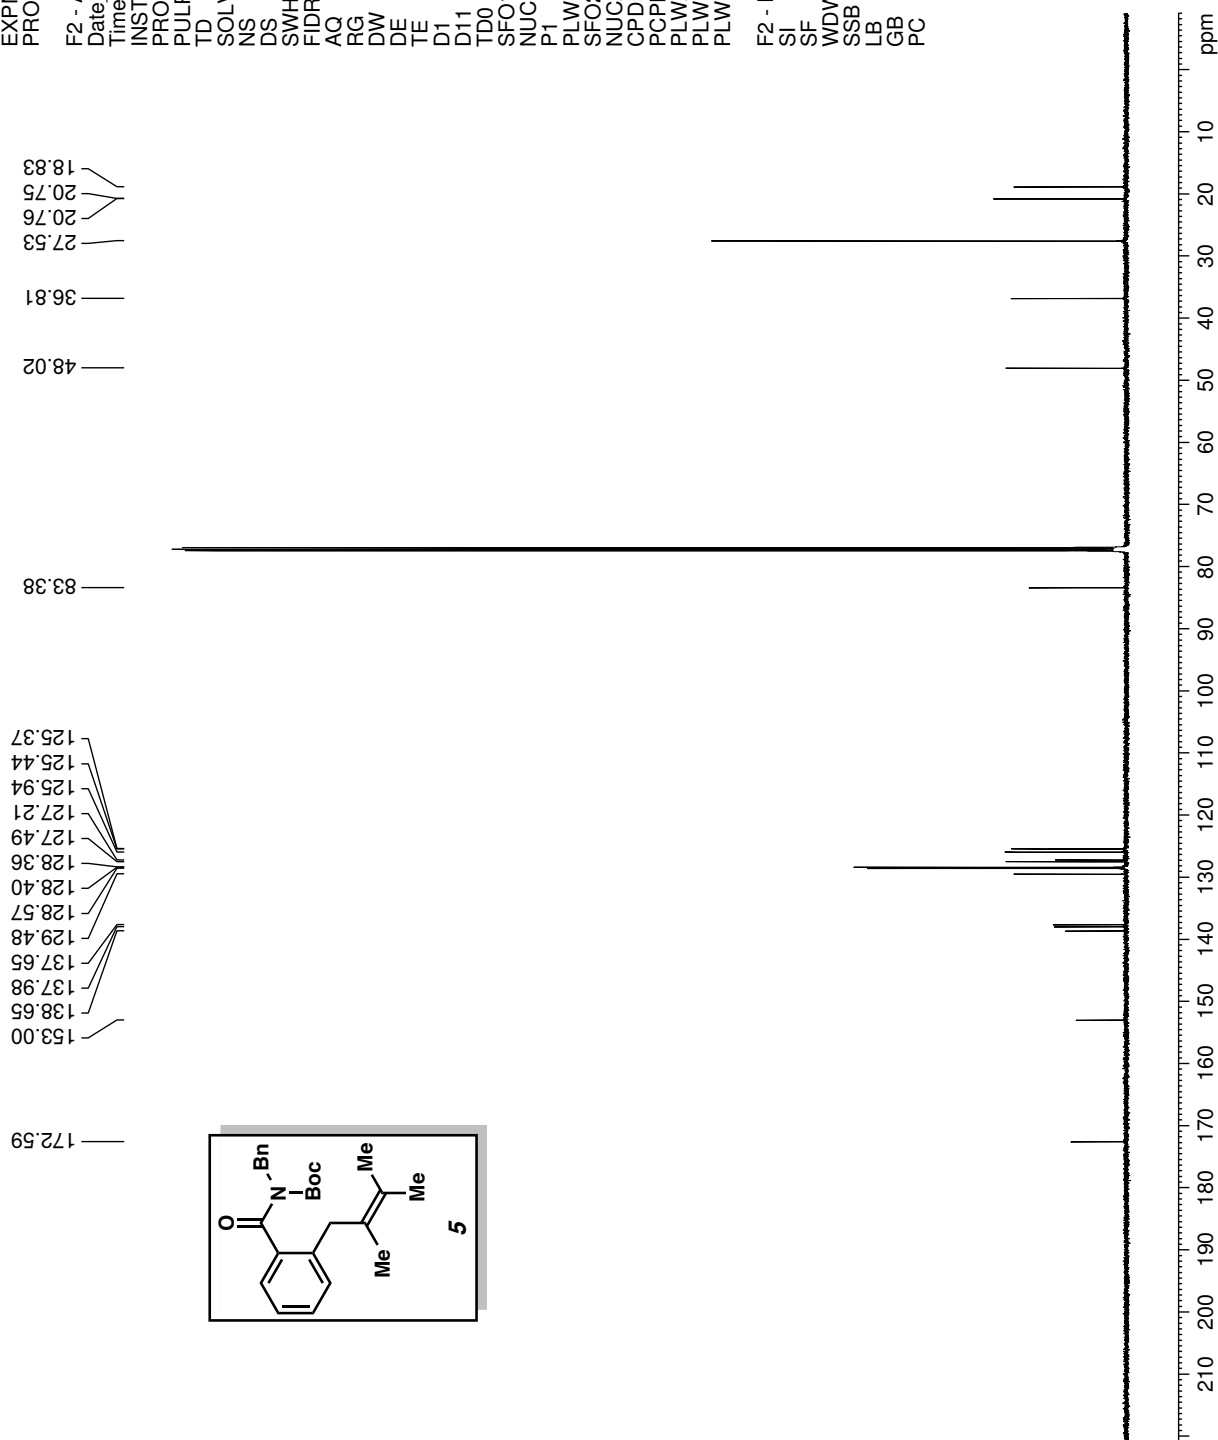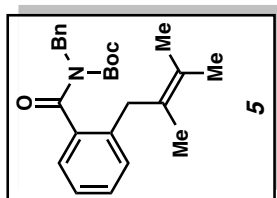



Current Data Parameters  
 NAME JM-4-296  
 EXPNO 101  
 PROCNO 1

F2 - Acquisition Parameters  
 Date\_ 20170115  
 Time\_ 17.23 h  
 INSTRUM av500  
 PROBHD Z119248\_0002 (  
 PULPROG zgpg30  
 TD 65536  
 SOLVENT CDCl3  
 NS 144  
 DS 2  
 SWH 31250.000 Hz  
 FIDRES 0.953674 Hz  
 AQ 1.0485760 sec  
 RG 204.54  
 DW 16.000 usec  
 DE 18.00 usec  
 TE 298.0 K  
 D1 2.00000000 sec  
 D11 0.03000000 sec  
 TD0 1  
 SFO1 125.7722511 MHz  
 NUC1 13C  
 P1 10.50 usec  
 PLW1 23.00000000 W  
 SFO2 500.1330008 MHz  
 NUC2 1H  
 CPDPRG2 waltz16  
 PCPD2 80.00 usec  
 PLW2 13.50000000 W  
 PLW12 0.21094000 W  
 PLW13 0.10610000 W

F2 - Processing parameters  
 SI 131072  
 SF 125.7577727 MHz  
 WDW EM  
 SSB 0  
 LB 1.00 Hz  
 GB 0  
 PC 1.40

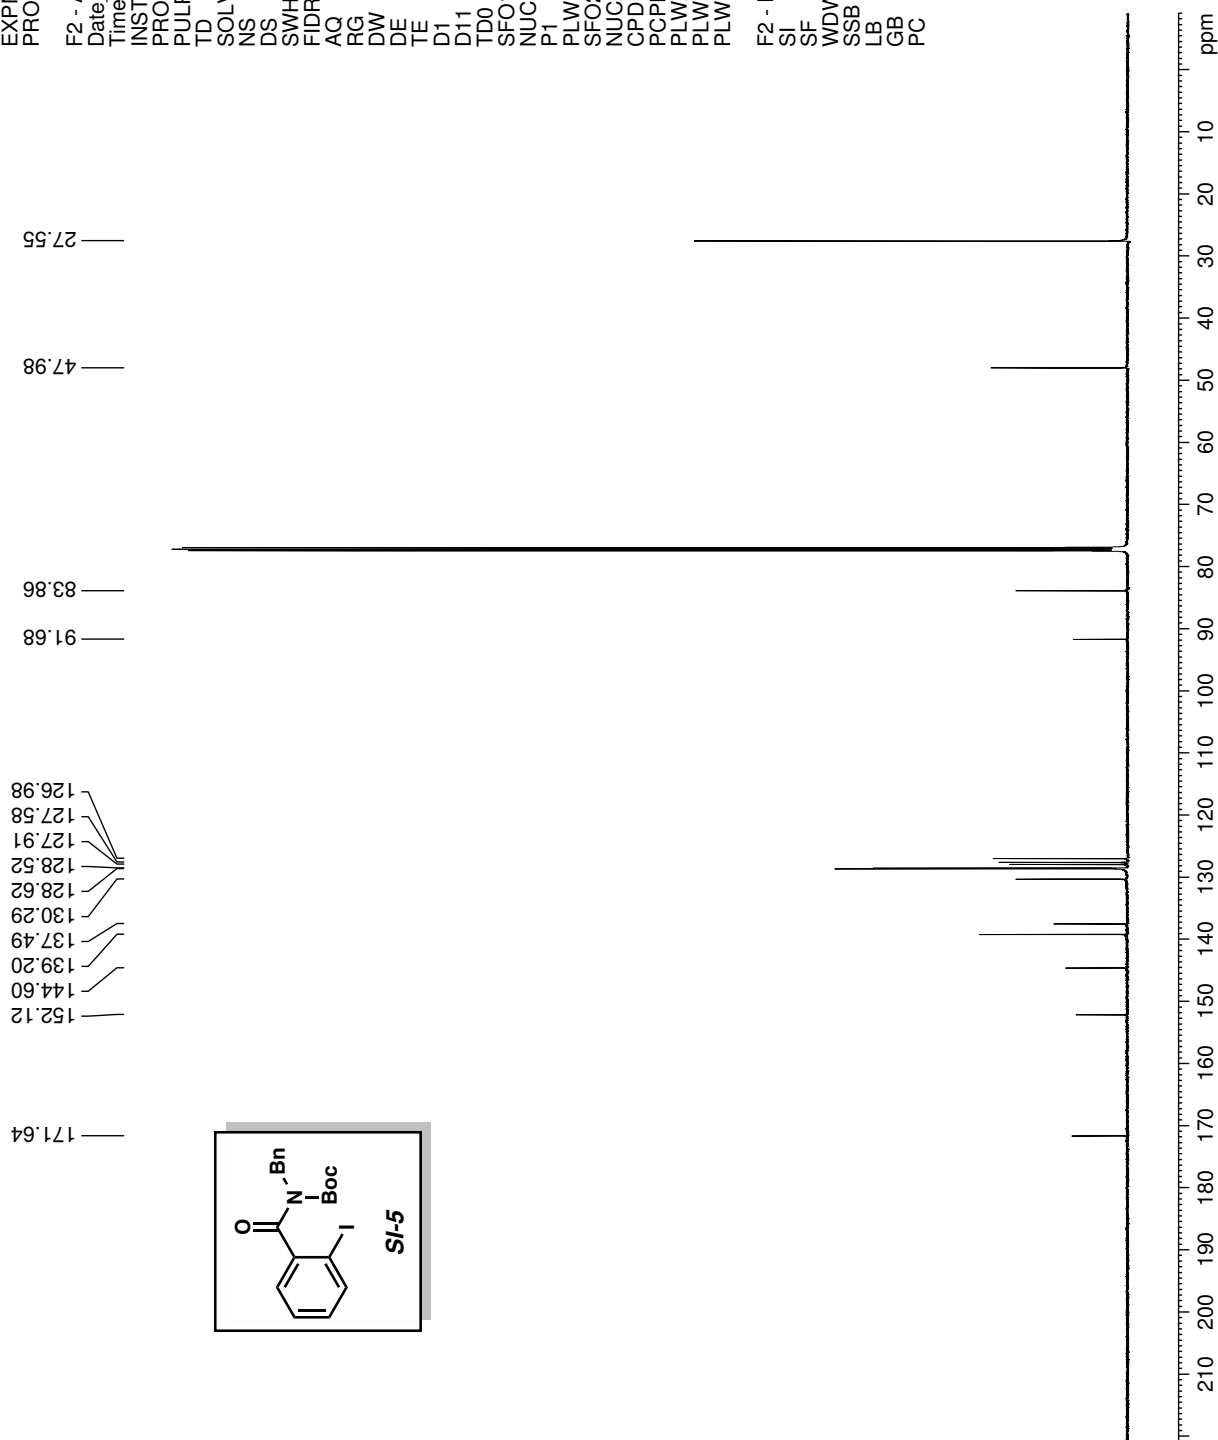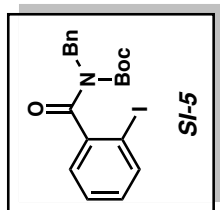

Current Data Parameters  
 NAME JM-5-054  
 EXPNO 2  
 PROCNO 1

F2 - Acquisition Parameters  
 Date\_ 20170217  
 Time 18.33 h  
 INSTRUM av500  
 PROBHD Z119248\_0002 (  
 PULPROG zgpg30  
 TD 65536  
 SOLVENT CDCl3  
 NS 8  
 DS 2  
 SWH 31250.000 Hz  
 FIDRES 0.953674 Hz  
 AQ 1.0485760 sec  
 RG 204.54  
 DW 16.000 usec  
 DE 18.00 usec  
 TE 298.0 K  
 D1 2.00000000 sec  
 D11 0.03000000 sec  
 TD0 1  
 SFO1 125.7722511 MHz  
 NUC1 13C  
 P1 10.50 usec  
 PLW1 23.00000000 W  
 SFO2 500.1330008 MHz  
 NUC2 1H  
 CPDPRG2 waltz16  
 PCPD2 80.00 usec  
 PLW2 13.50000000 W  
 PLW12 0.21094000 W  
 PLW13 0.10610000 W

F2 - Processing parameters  
 SI 131072  
 SF 125.7577738 MHz  
 WDW EM  
 SSB 0  
 LB 1.00 Hz  
 GB 0  
 PC 1.40

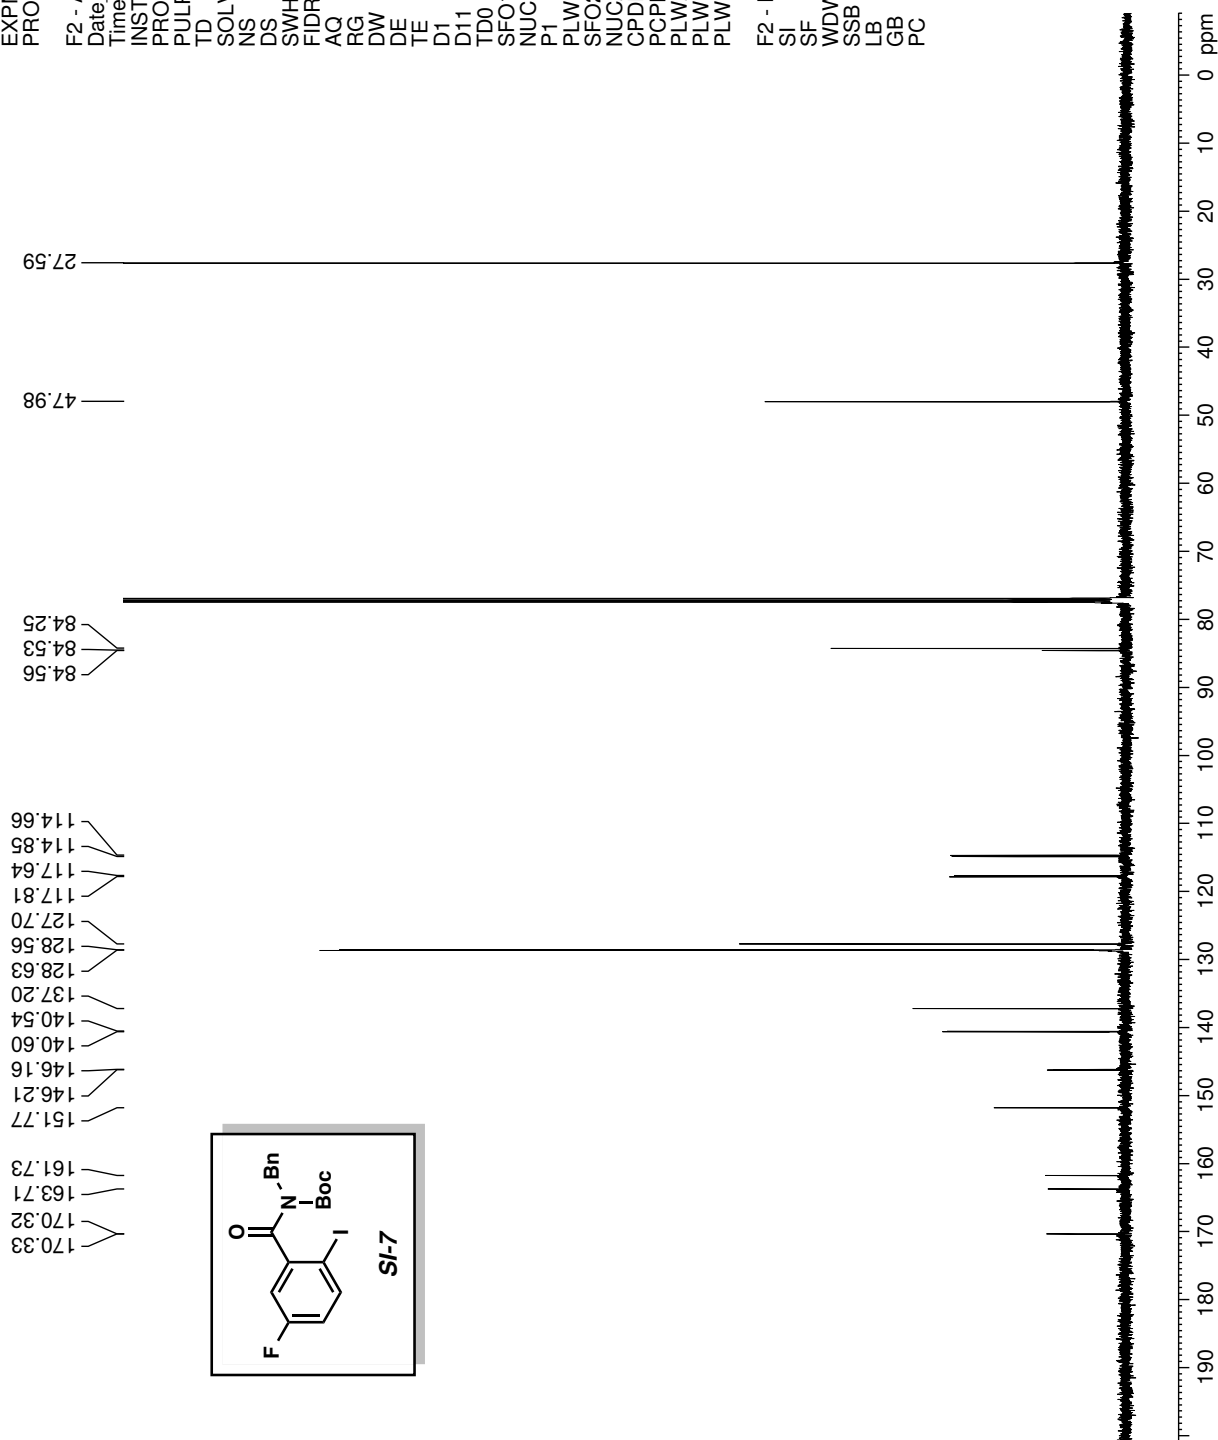

Current Data Parameters  
 NAME JM-5-037  
 EXPNO 101  
 PROCNO 1

F2 - Acquisition Parameters  
 Date\_ 20170130  
 Time\_ 18.24 h  
 INSTRUM av500  
 PROBHD Z119248\_0002 (  
 PULPROG zgpg30  
 TD 65536  
 SOLVENT CDCl3  
 NS 104  
 DS 2  
 SWH 31250.000 Hz  
 FIDRES 0.953674 Hz  
 AQ 1.0485760 sec  
 RG 204.54  
 DW 16.000 usec  
 DE 18.00 usec  
 TE 298.0 K  
 D1 2.00000000 sec  
 D11 0.03000000 sec  
 TD0 1  
 SFO1 125.7722511 MHz  
 NUC1 13C  
 P1 10.50 usec  
 PLW1 23.00000000 W  
 SFO2 500.1330008 MHz  
 NUC2 1H  
 CPDPRG2 waltz16  
 PCPD2 80.00 usec  
 PLW2 13.50000000 W  
 PLW12 0.21094000 W  
 PLW13 0.10610000 W

F2 - Processing parameters  
 SI 131072  
 SF 125.7577732 MHz  
 WDW EM  
 SSB 0  
 LB 1.00 Hz  
 GB 0  
 PC 1.40

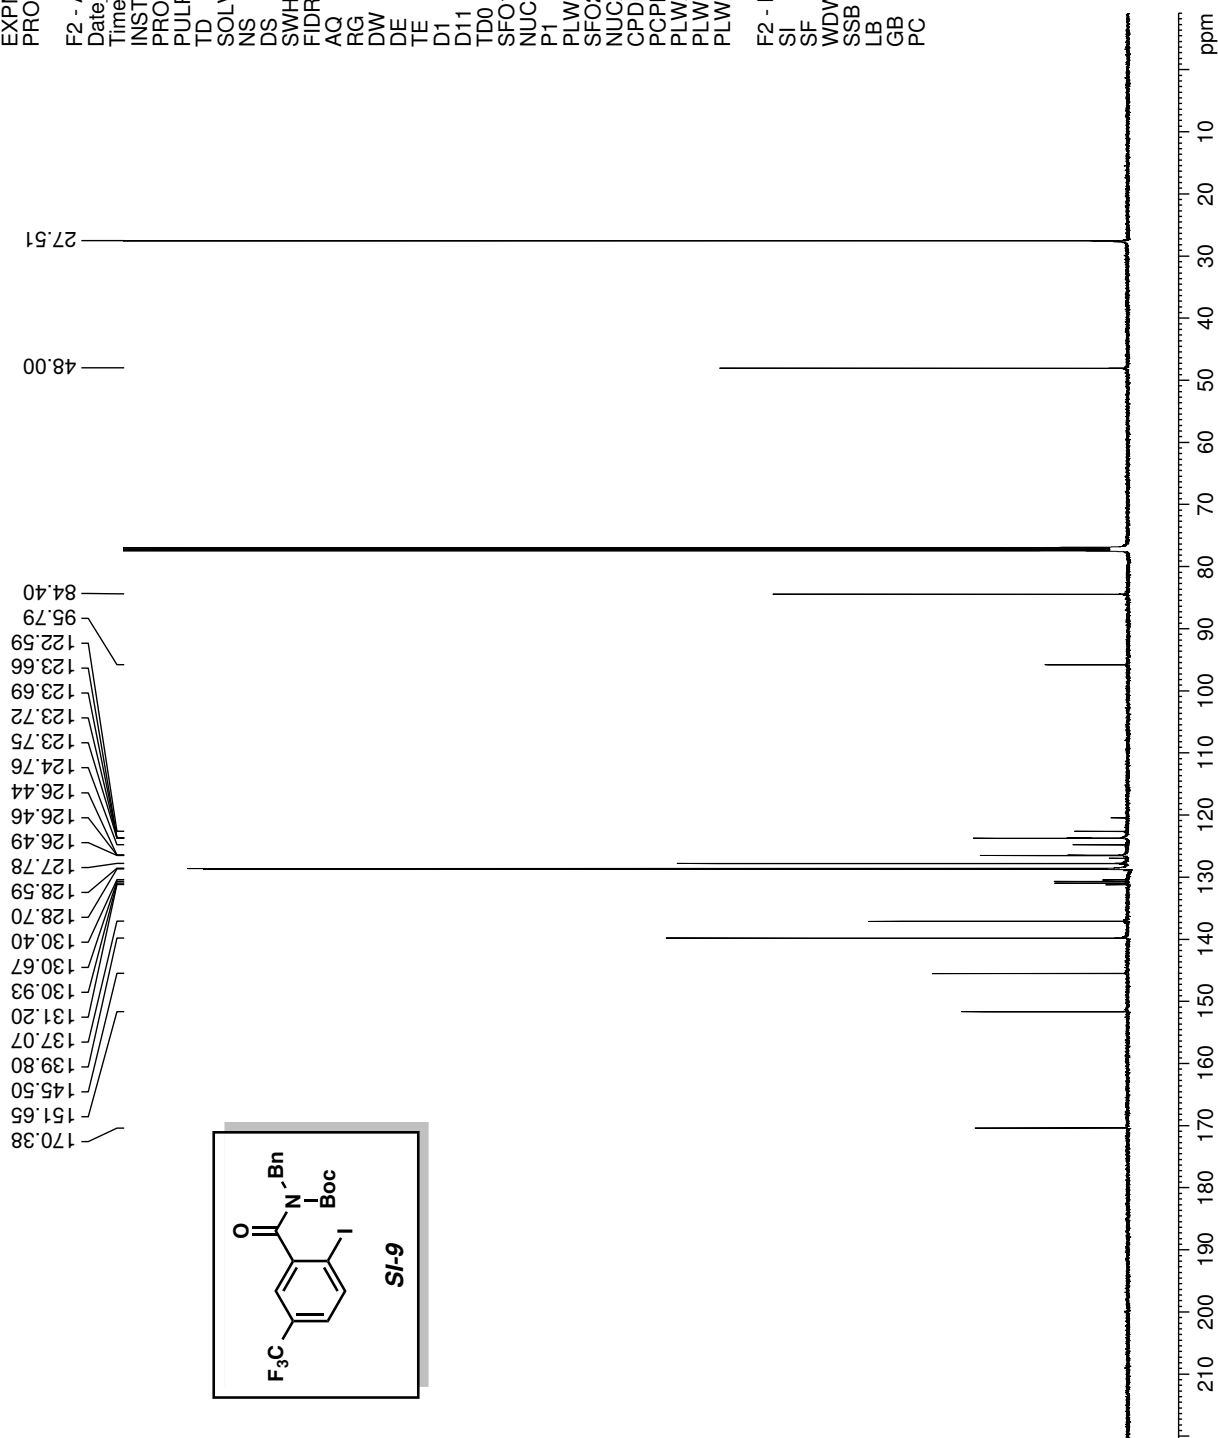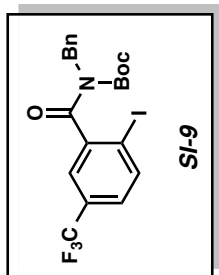

Current Data Parameters  
 NAME JM-5-033.500.2  
 EXPNO 3  
 PROCNO 1

F2 - Acquisition Parameters  
 Date\_ 20170130  
 Time\_ 9:36 h  
 INSTRUM av500  
 PROBHD Z119248\_0002 (  
 PULPROG zgpg30  
 TD 65536  
 SOLVENT CDCl3  
 NS 128  
 DS 2  
 SWH 31250.000 Hz  
 FIDRES 0.953674 Hz  
 AQ 1.0485760 sec  
 RG 204.54  
 DW 16.000 usec  
 DE 18.00 usec  
 TE 298.0 K  
 D1 2.00000000 sec  
 D11 0.03000000 sec  
 TD0 1  
 SFO1 125.7722511 MHz  
 NUC1 13C  
 P1 10.50 usec  
 PLW1 23.00000000 W  
 SFO2 500.1330008 MHz  
 NUC2 1H  
 CPDPRG[2] waltz16  
 PCPD2 80.00 usec  
 PLW2 13.50000000 W  
 PLW12 0.21094000 W  
 PLW13 0.10610000 W

F2 - Processing parameters  
 SI 131072  
 SF 125.7577916 MHz  
 WDW EM  
 SSB 0  
 LB 1.00 Hz  
 GB 0  
 PC 1.40

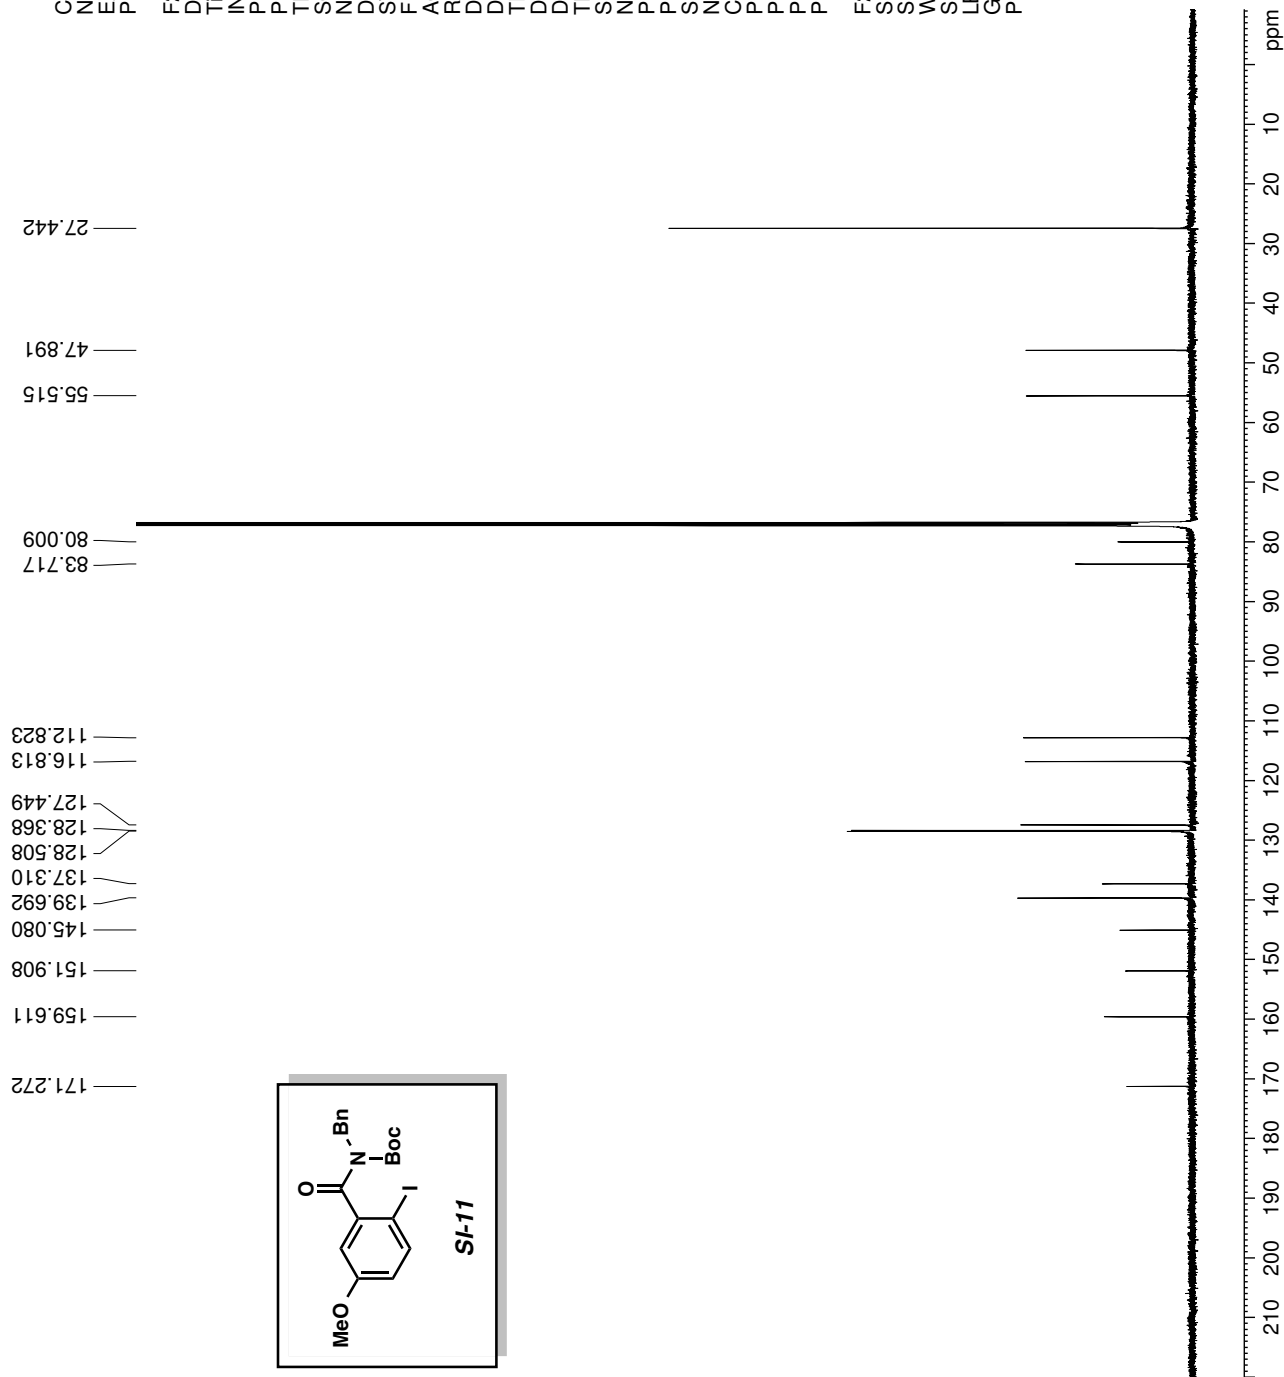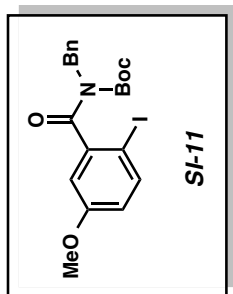

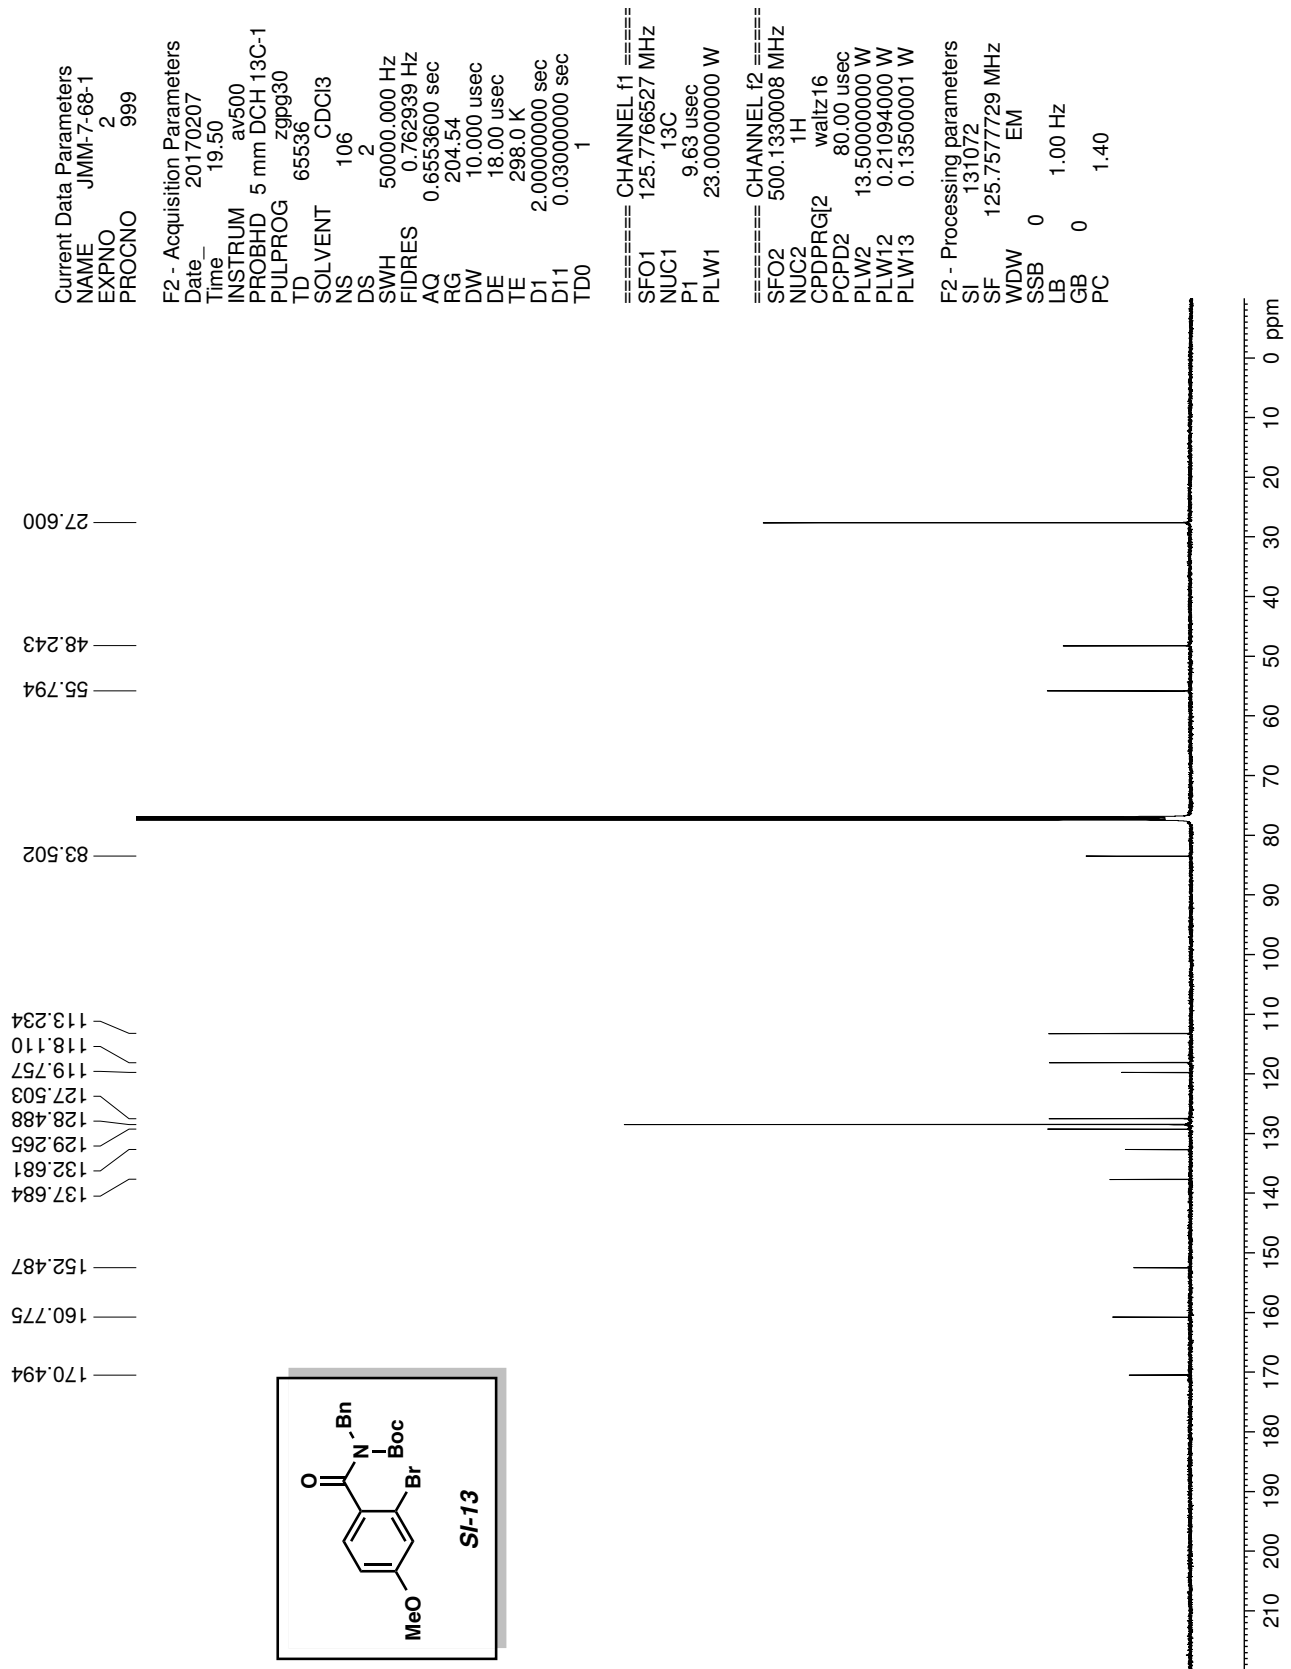

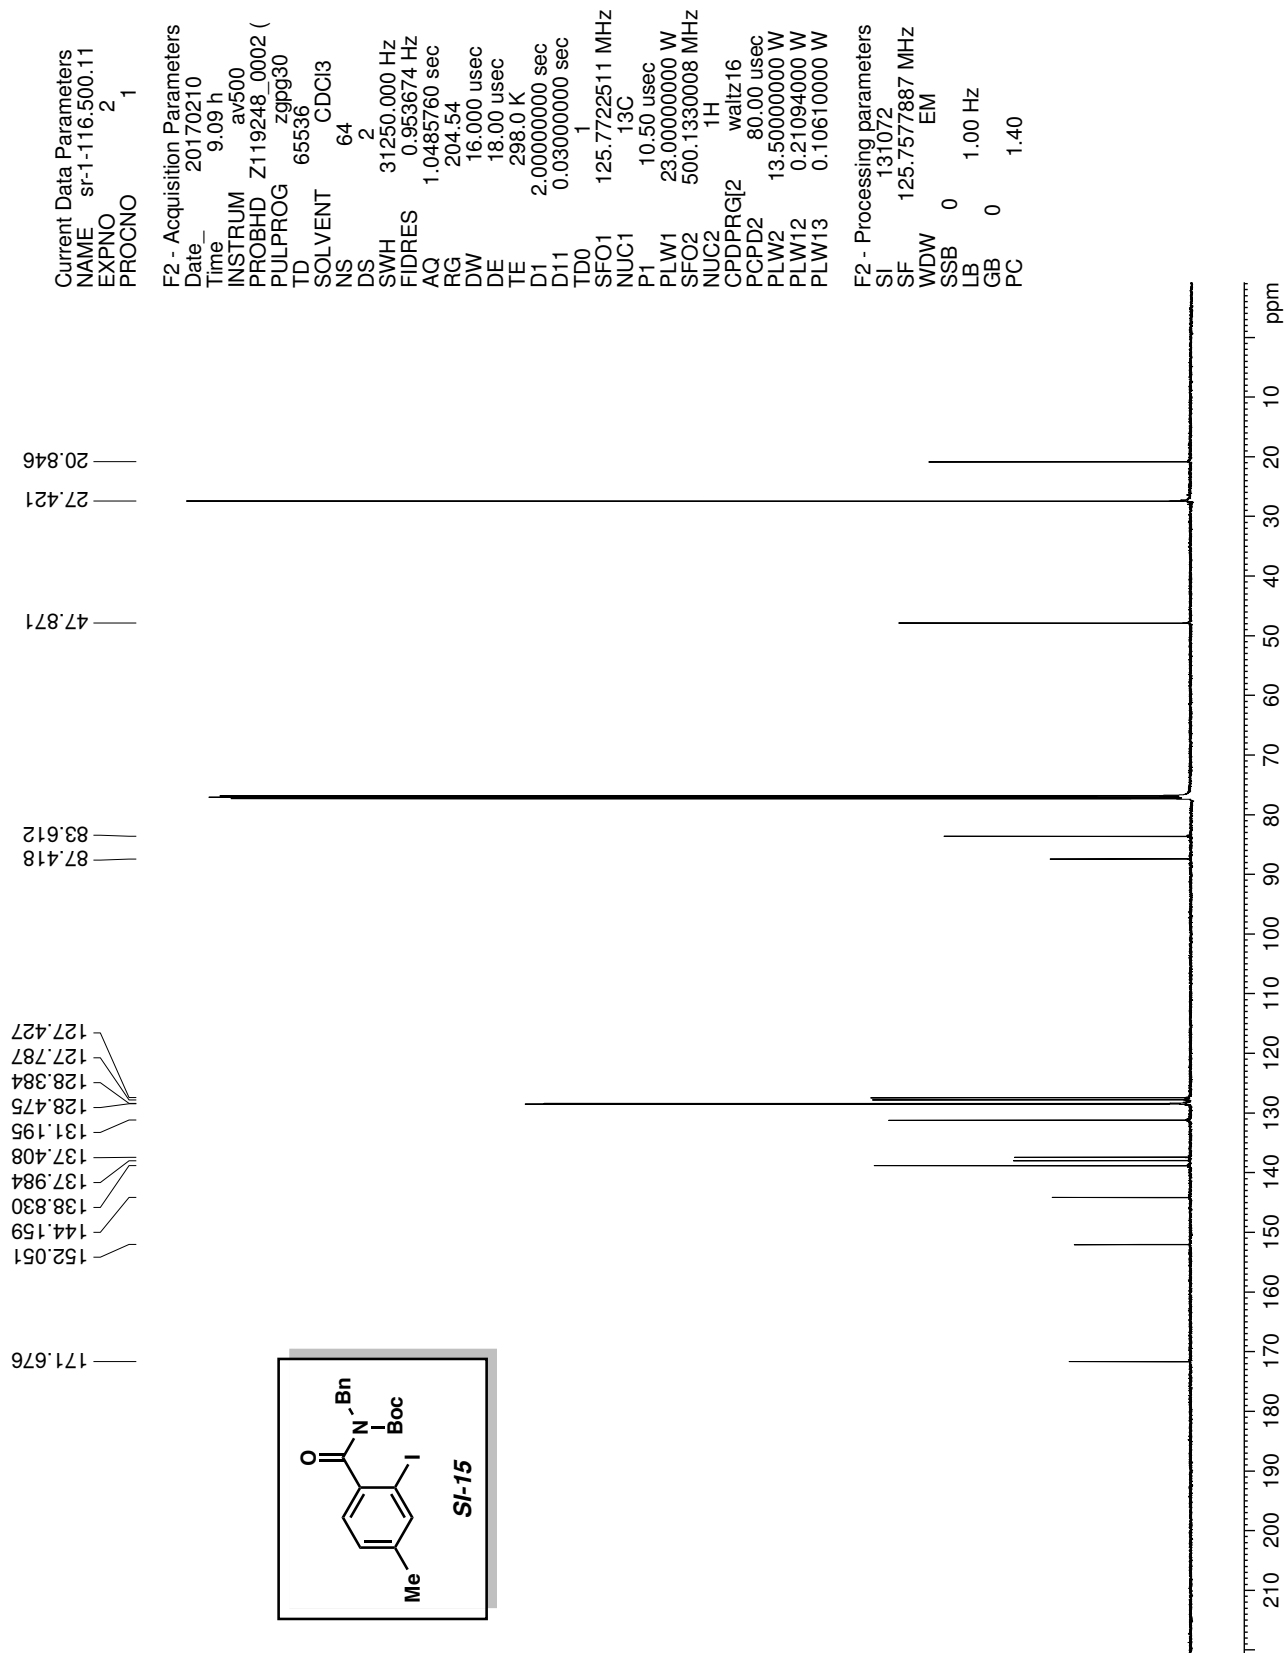

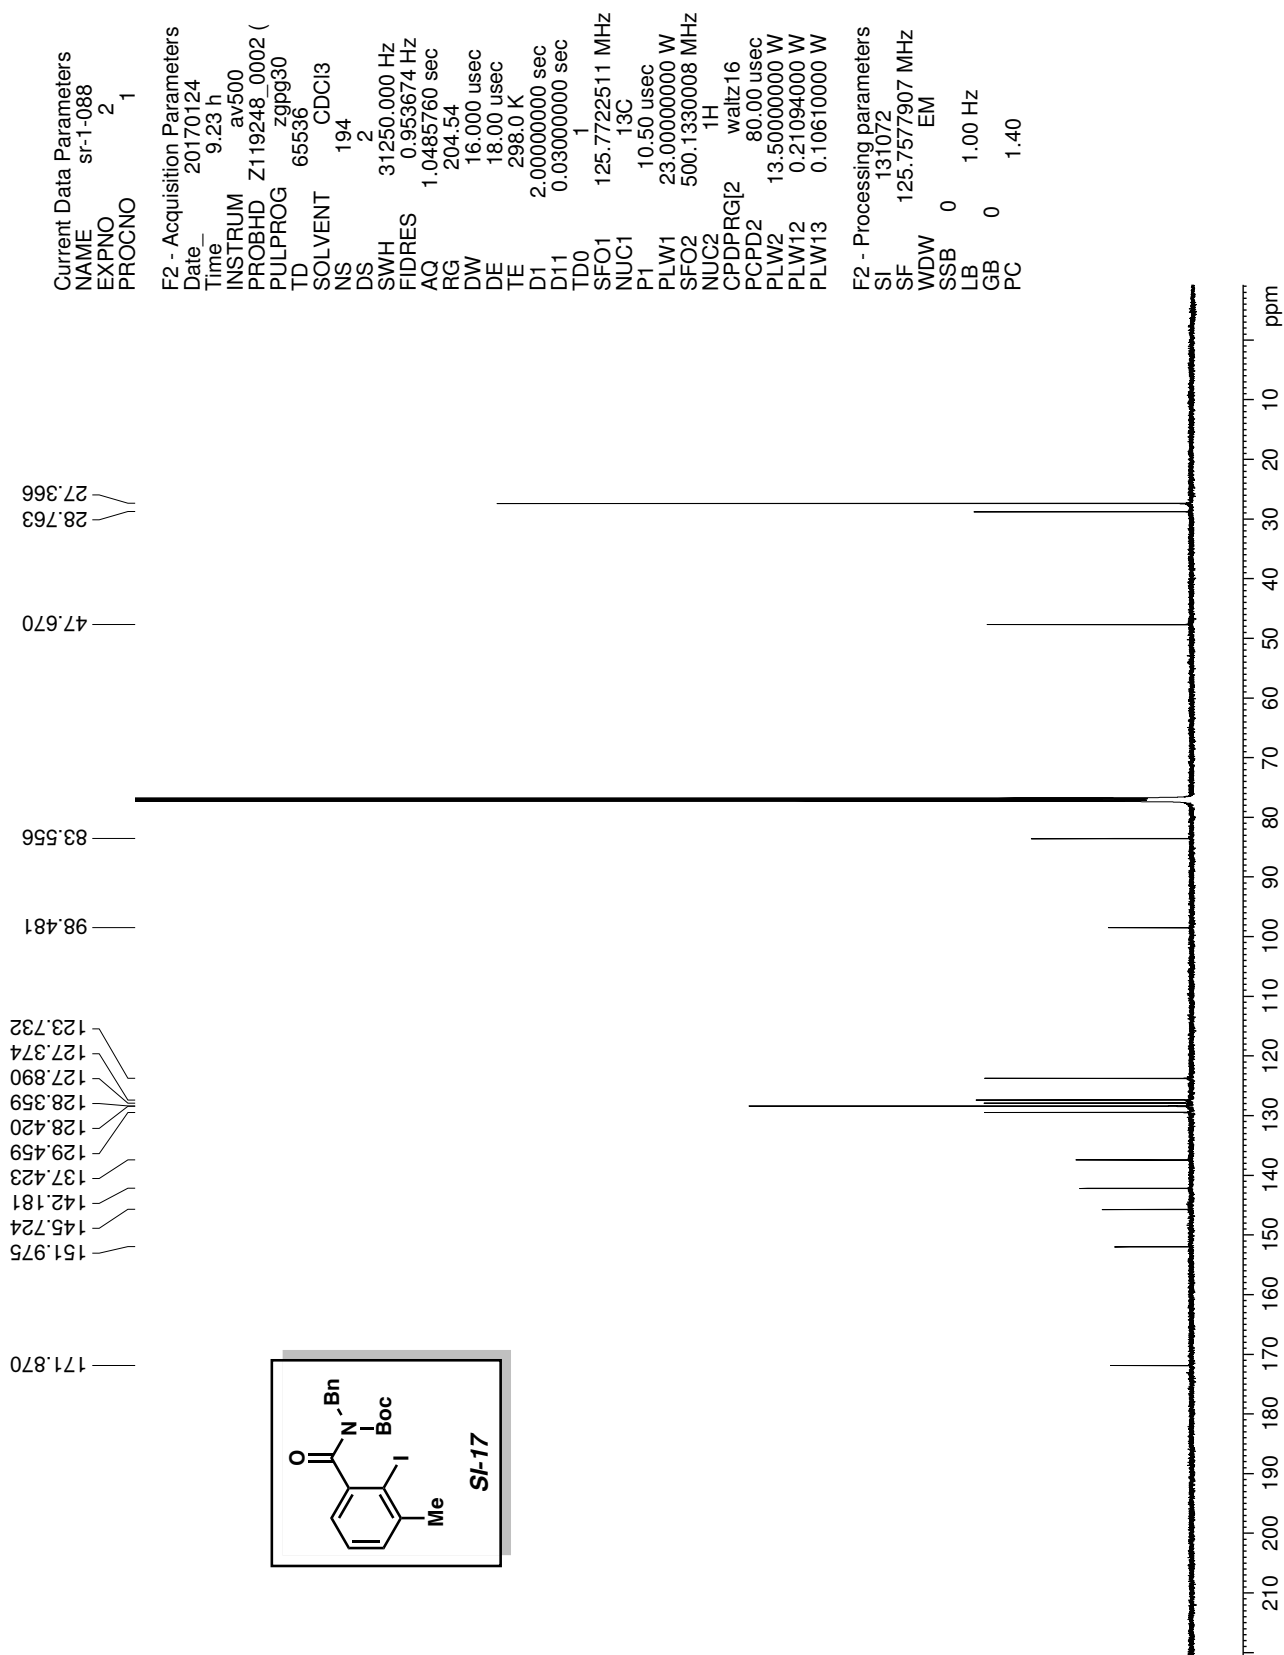

Current Data Parameters  
 NAME sr-1-035  
 EXPNO 2  
 PROCNO 1

F2 - Acquisition Parameters  
 Date\_ 20170109  
 Time\_ 17.49 h  
 INSTRUM av500  
 PROBHD Z119248\_0002 ( )  
 PULPROG zgpg30  
 TD 65536  
 SOLVENT CDCl3  
 NS 7  
 DS 2  
 SWH 31250.000 Hz  
 FIDRES 0.953674 Hz  
 AQ 1.0485760 sec  
 RG 204.54  
 DW 16.000 usec  
 DE 18.00 usec  
 TE 298.0 K  
 D1 2.00000000 sec  
 D11 0.03000000 sec  
 TD0 1  
 SFO1 125.7722511 MHz  
 NUC1 13C  
 P1 10.50 usec  
 PLW1 23.00000000 W  
 SFO2 500.1330008 MHz  
 NUC2 1H  
 CPDPRG2 waltz16  
 PCPD2 80.00 usec  
 PLW2 13.50000000 W  
 PLW12 0.21094000 W  
 PLW13 0.10610000 W

F2 - Processing parameters  
 SI 131072  
 SF 125.7577774 MHz  
 WDW EM  
 SSB 0  
 LB 0  
 GB 0  
 PC 1.40

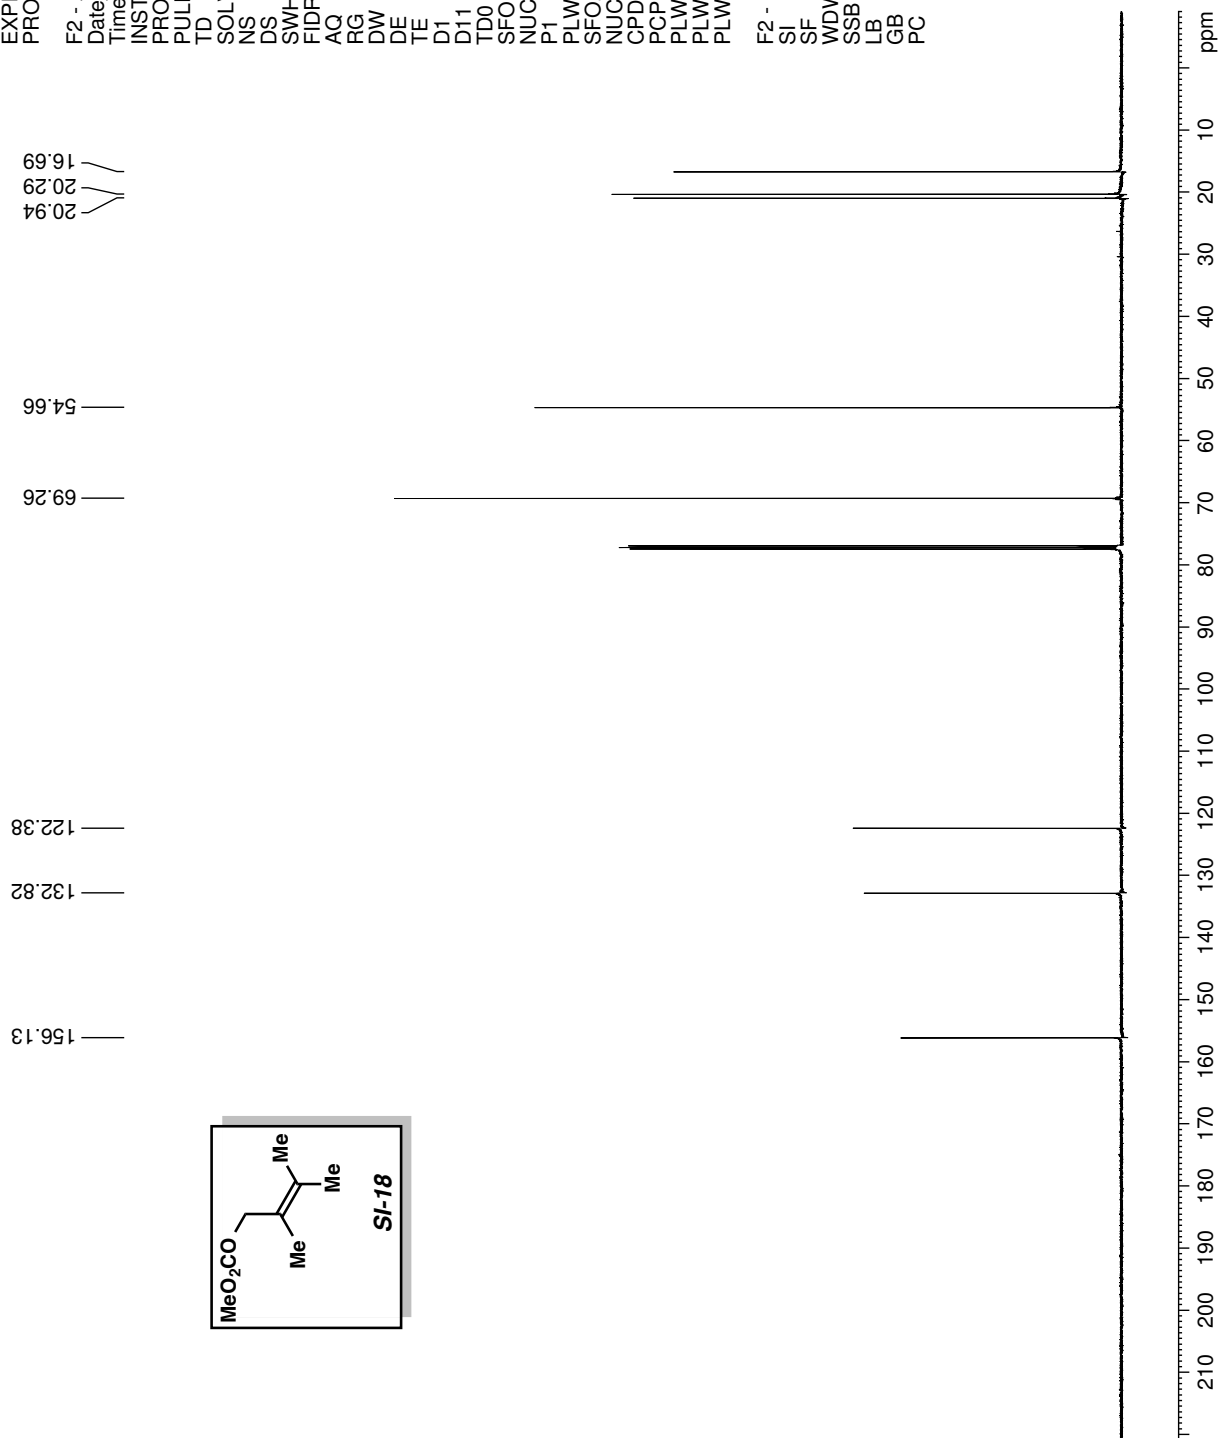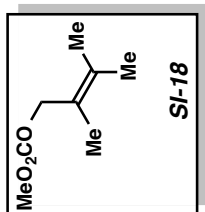



Current Data Parameters  
 NAME sr-1-065  
 EXPNO 101  
 PROCNO 1

F2 - Acquisition Parameters  
 Date\_ 20170109  
 Time\_ 17.56 h  
 INSTRUM av500  
 PROBHD Z119248\_0002 (  
 PULPROG zgpg30  
 TD 65536  
 SOLVENT CDCl3  
 NS 16  
 DS 2  
 SWH 31250.000 Hz  
 FIDRES 0.953674 Hz  
 AQ 1.0485760 sec  
 RG 204.54  
 DW 16.000 usec  
 DE 18.00 usec  
 TE 298.0 K  
 D1 2.00000000 sec  
 D11 0.03000000 sec  
 TD0 1  
 SFO1 125.7722511 MHz  
 NUC1 <sup>13</sup>C  
 P1 10.50 usec  
 PLW1 23.00000000 W  
 SFO2 500.1330008 MHz  
 NUC2 <sup>1</sup>H  
 CPDPRG2 waltz16  
 PCPD2 80.00 usec  
 PLW2 13.50000000 W  
 PLW12 0.21094000 W  
 PLW13 0.10610000 W

F2 - Processing parameters  
 SI 131072  
 SF 125.7577729 MHz  
 WDW EM  
 SSB 0  
 LB 0 1.00 Hz  
 GB 0  
 PC 1.40

155.95  
 130.39  
 125.17  
 74.02  
 54.81  
 13.66  
 13.38

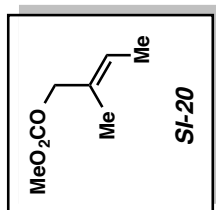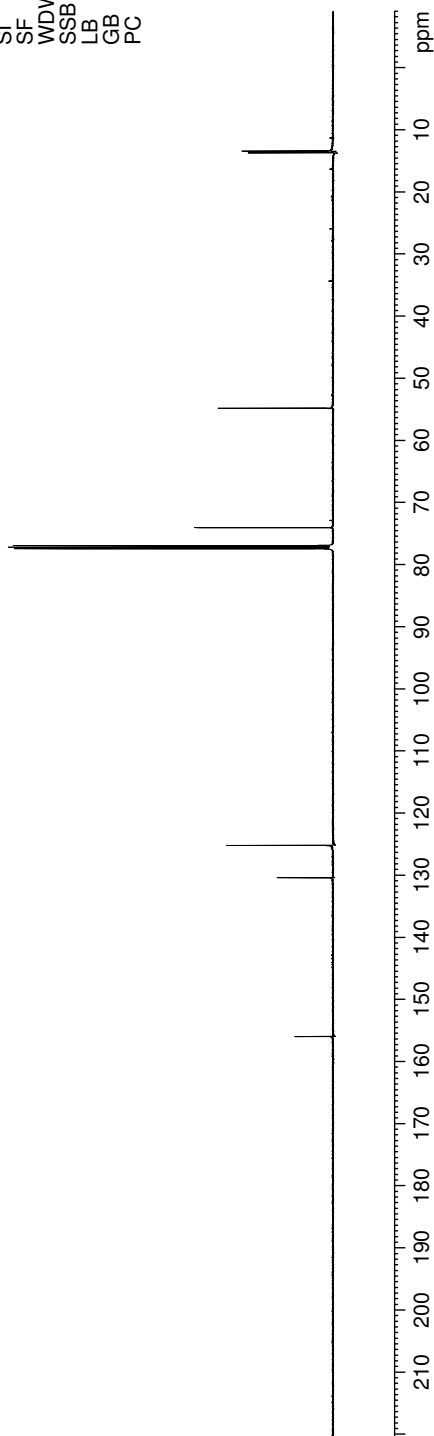

Current Data Parameters  
 NAME JMM-7-216char  
 EXPNO 2  
 PROCNO 999

F2 - Acquisition Parameters  
 Date\_ 20170108  
 Time\_ 10.11  
 INSTRUM av500  
 PROBHD 5 mm DCH 13C-1  
 PULPROG zgpg30  
 TD 65536  
 SOLVENT CDCl3  
 NS 115  
 DS 2  
 SWH 50000.000 Hz  
 FIDRES 0.762939 Hz  
 AQ 0.6553600 sec  
 RG 204.54  
 DW 10.000 usec  
 DE 18.00 usec  
 TE 298.0 K  
 D1 2.00000000 sec  
 D11 0.03000000 sec  
 TD0 1

=====  
 CHANNEL f1 =====  
 SFO1 125.7766527 MHz  
 NUC1 13C  
 P1 9.63 usec  
 PLW1 23.00000000 W

=====  
 CHANNEL f2 =====  
 SFO2 500.1330008 MHz  
 NUC2 1H  
 CPDPRG2 waltz16  
 PCPD2 80.00 usec  
 PLW2 13.50000000 W  
 PLW12 0.21094000 W  
 PLW13 0.13500001 W

F2 - Processing parameters  
 SI 131072  
 SF 125.757718 MHz  
 WDW EM  
 SSB 0  
 LB 1.00 Hz  
 GB 0  
 PC 1.40

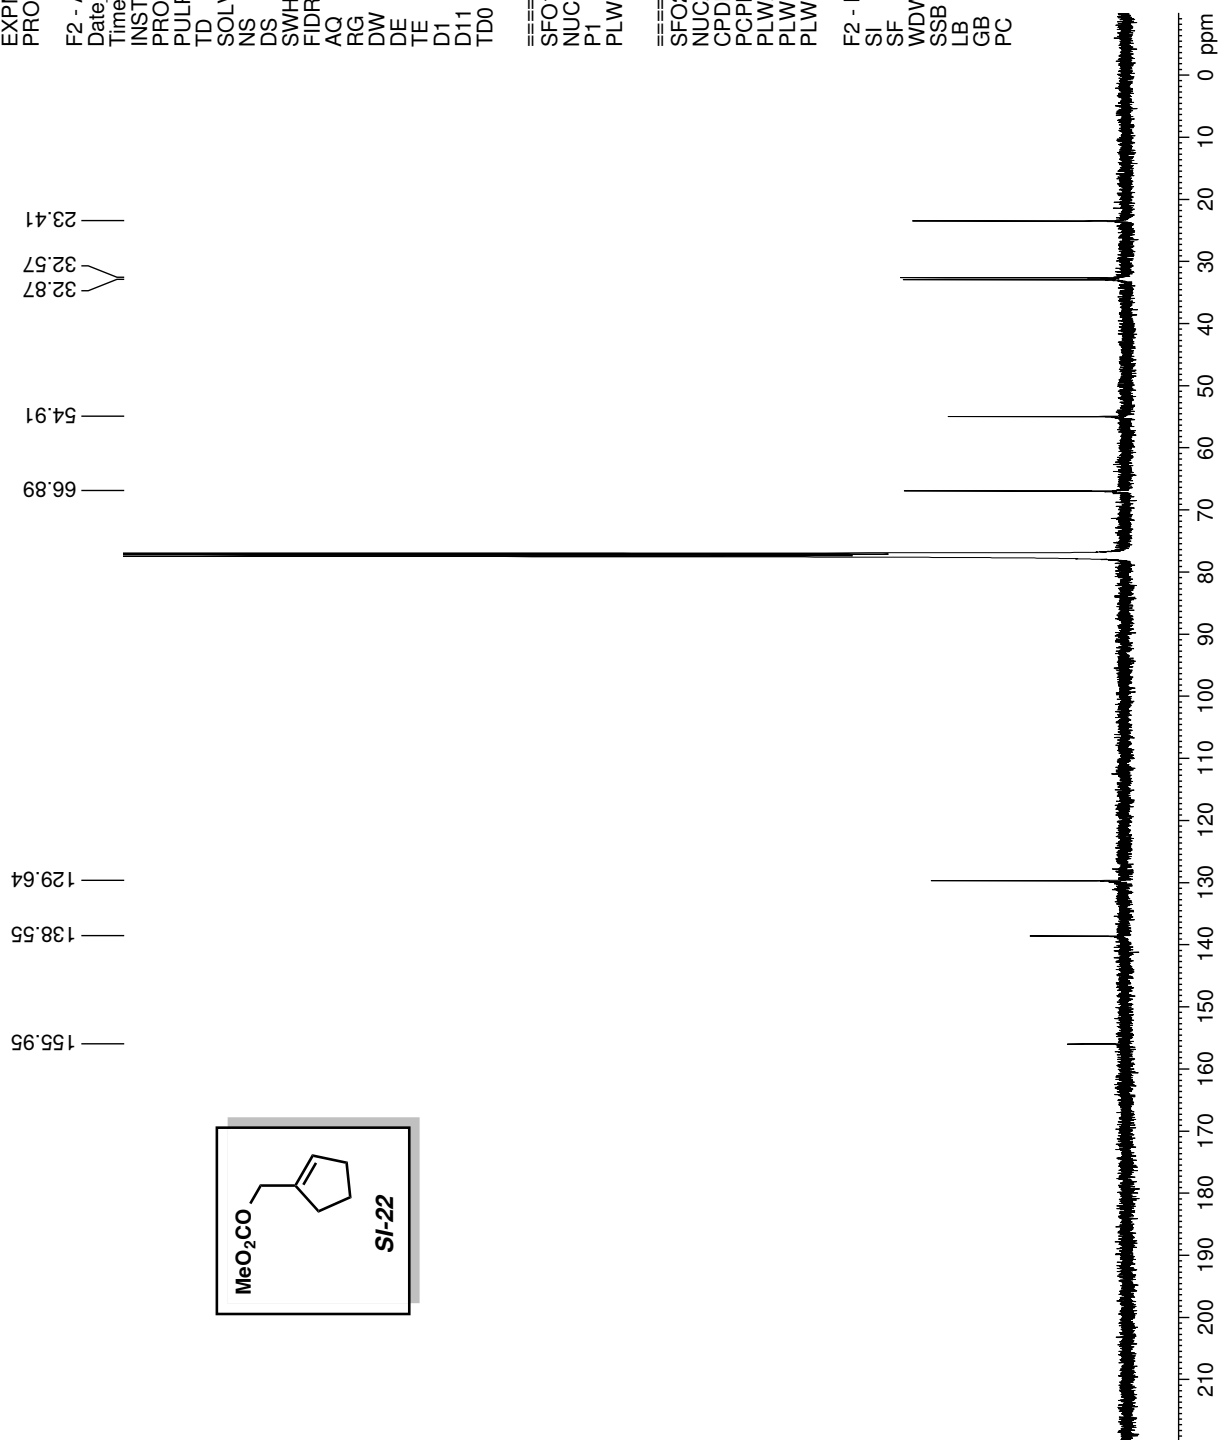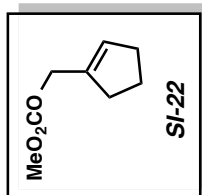

Current Data Parameters  
 NAME JM-4-293  
 EXPNO 101  
 PROCNO 1

F2 - Acquisition Parameters  
 Date\_ 20161219  
 Time\_ 18.26 h  
 INSTRUM av500  
 PROBHD Z119248\_0002 (  
 PULPROG zgpg30  
 TD 65536  
 SOLVENT CDCl3  
 NS 48  
 DS 2  
 SWH 31250.000 Hz  
 FIDRES 0.953674 Hz  
 AQ 1.0485760 sec  
 RG 204.54  
 DW 16.000 usec  
 DE 18.00 usec  
 TE 298.0 K  
 D1 2.00000000 sec  
 D11 0.03000000 sec  
 TD0 1  
 SFO1 125.7722511 MHz  
 NUC1 13C  
 P1 10.50 usec  
 PLW1 23.00000000 W  
 SFO2 500.1330008 MHz  
 NUC2 1H  
 CPDPRG2 waltz16  
 PCPD2 80.00 usec  
 PLW2 13.50000000 W  
 PLW12 0.21094000 W  
 PLW13 0.10610000 W

F2 - Processing parameters  
 SI 131072  
 SF 125.7577724 MHz  
 WDW EM  
 SSB 0  
 LB 0  
 GB 0  
 PC 1.40

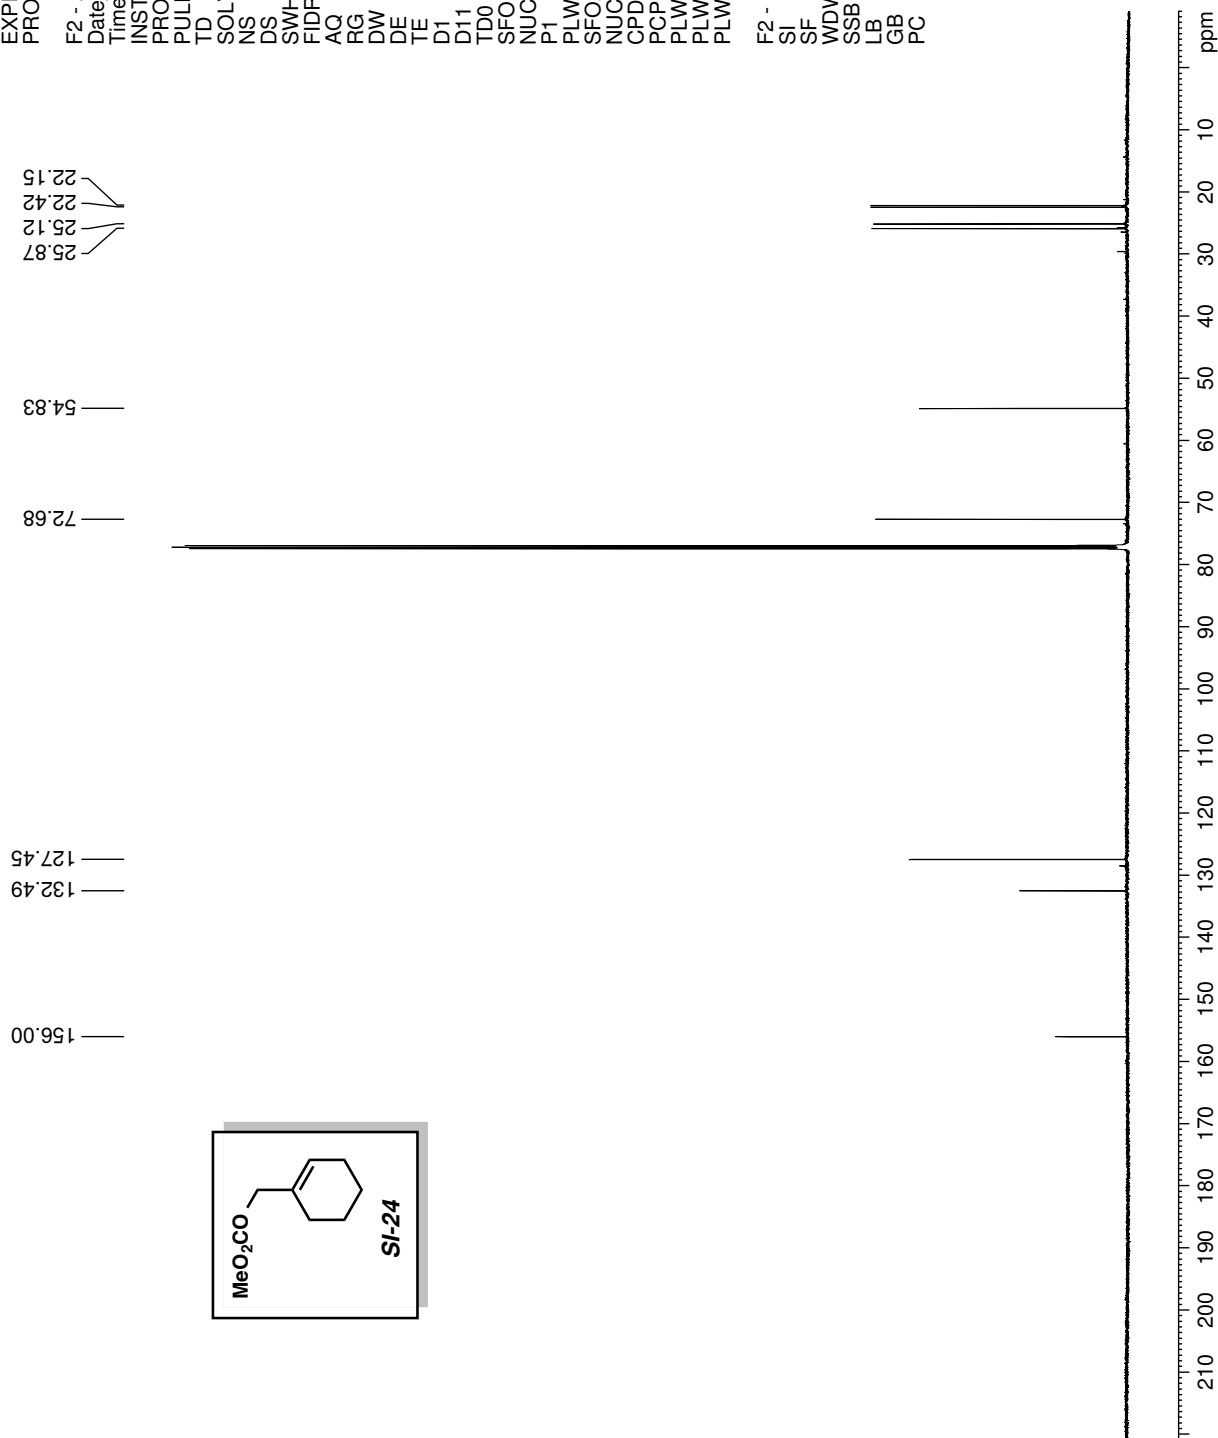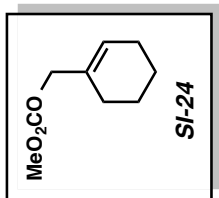

Current Data Parameters  
 NAME JMM-7-192-3  
 EXPNO 2  
 PROCNO 1

F2 - Acquisition Parameters  
 Date\_ 20161123  
 Time\_ 14.09  
 INSTRUM av500  
 PROBHD 5 mm DCH 13C-1  
 PULPROG zgpg30  
 TD 65536  
 SOLVENT CDCl3  
 NS 67  
 DS 2  
 SWH 43859.648 Hz  
 FIDRES 0.669245 Hz  
 AQ 0.7471104 sec  
 RG 204.54  
 DW 11.400 usec  
 DE 18.00 usec  
 TE 298.0 K  
 D1 2.00000000 sec  
 D11 0.03000000 sec  
 TD0 1

==== CHANNEL f1 =====  
 SFO1 125.7728799 MHz  
 NUC1 13C  
 P1 9.63 usec  
 PLW1 23.00000000 W

==== CHANNEL f2 =====  
 SFO2 500.1330008 MHz  
 NUC2 1H  
 CPDPRG2 waltz16  
 PCPD2 80.00 usec  
 PLW2 13.50000000 W  
 PLW12 0.21094000 W  
 PLW13 0.13500001 W

F2 - Processing parameters  
 SI 131072  
 SF 125.7577719 MHz  
 WDW EM  
 SSB 0  
 LB 1.00 Hz  
 GB 0  
 PC 1.40

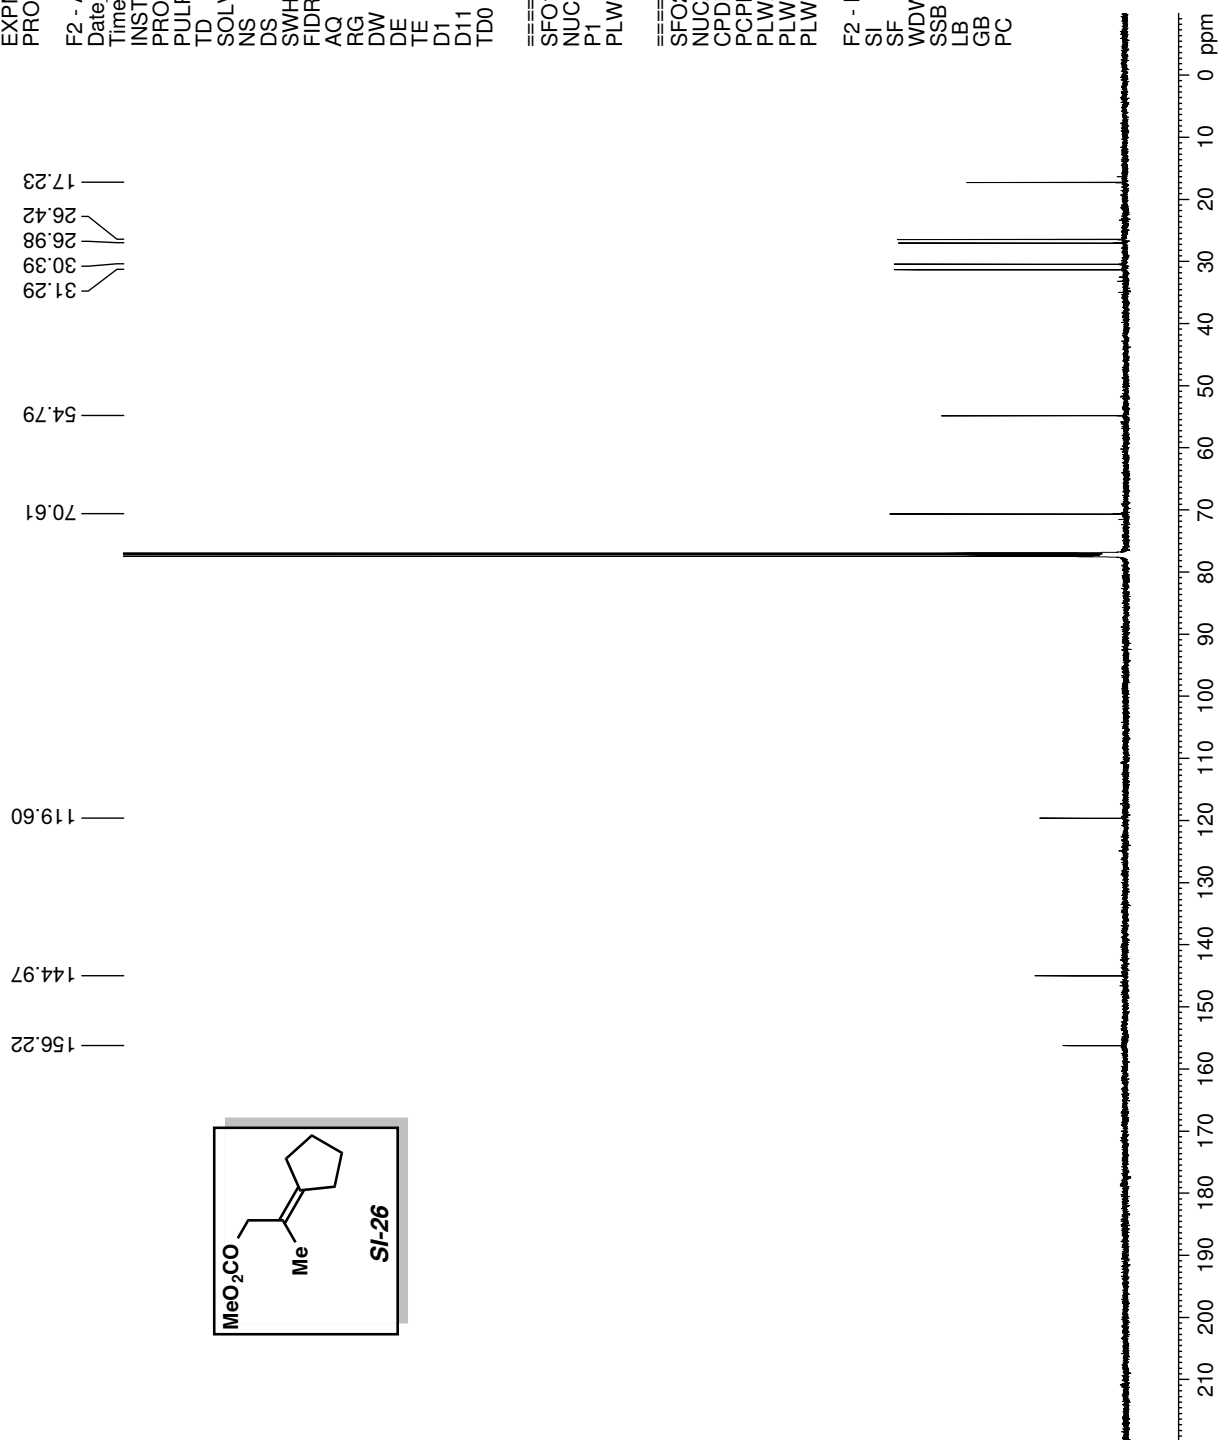

Current Data Parameters  
 NAME JMM-7-193-1  
 EXPNO 2  
 PROCNO 1

F2 - Acquisition Parameters  
 Date\_ 20161123  
 Time\_ 12.24  
 INSTRUM av500  
 PROBHD 5 mm DCH 13C-1  
 PULPROG zgpg30  
 TD 65536  
 SOLVENT CDCl3  
 NS 106  
 DS 2  
 SWH 43859.648 Hz  
 FIDRES 0.669245 Hz  
 AQ 0.7471104 sec  
 RG 204.54  
 DW 11.400 usec  
 DE 100.00 usec  
 TE 298.0 K  
 D1 2.00000000 sec  
 D11 0.03000000 sec  
 TD0 1

=====  
 CHANNEL f1  
 SFO1 125.7728799 MHz  
 NUC1 13C  
 P1 9.63 usec  
 PLW1 23.00000000 W

=====  
 CHANNEL f2  
 SFO2 500.1330008 MHz  
 NUC2 1H  
 CPDPRG2 waltz16  
 PCPD2 80.00 usec  
 PLW2 13.50000000 W  
 PLW12 0.21094000 W  
 PLW13 0.13500001 W

F2 - Processing parameters  
 SI 131072  
 SF 125.757713 MHz  
 WDW EM  
 SSB 0  
 LB 1.00 Hz  
 GB 0  
 PC 1.40

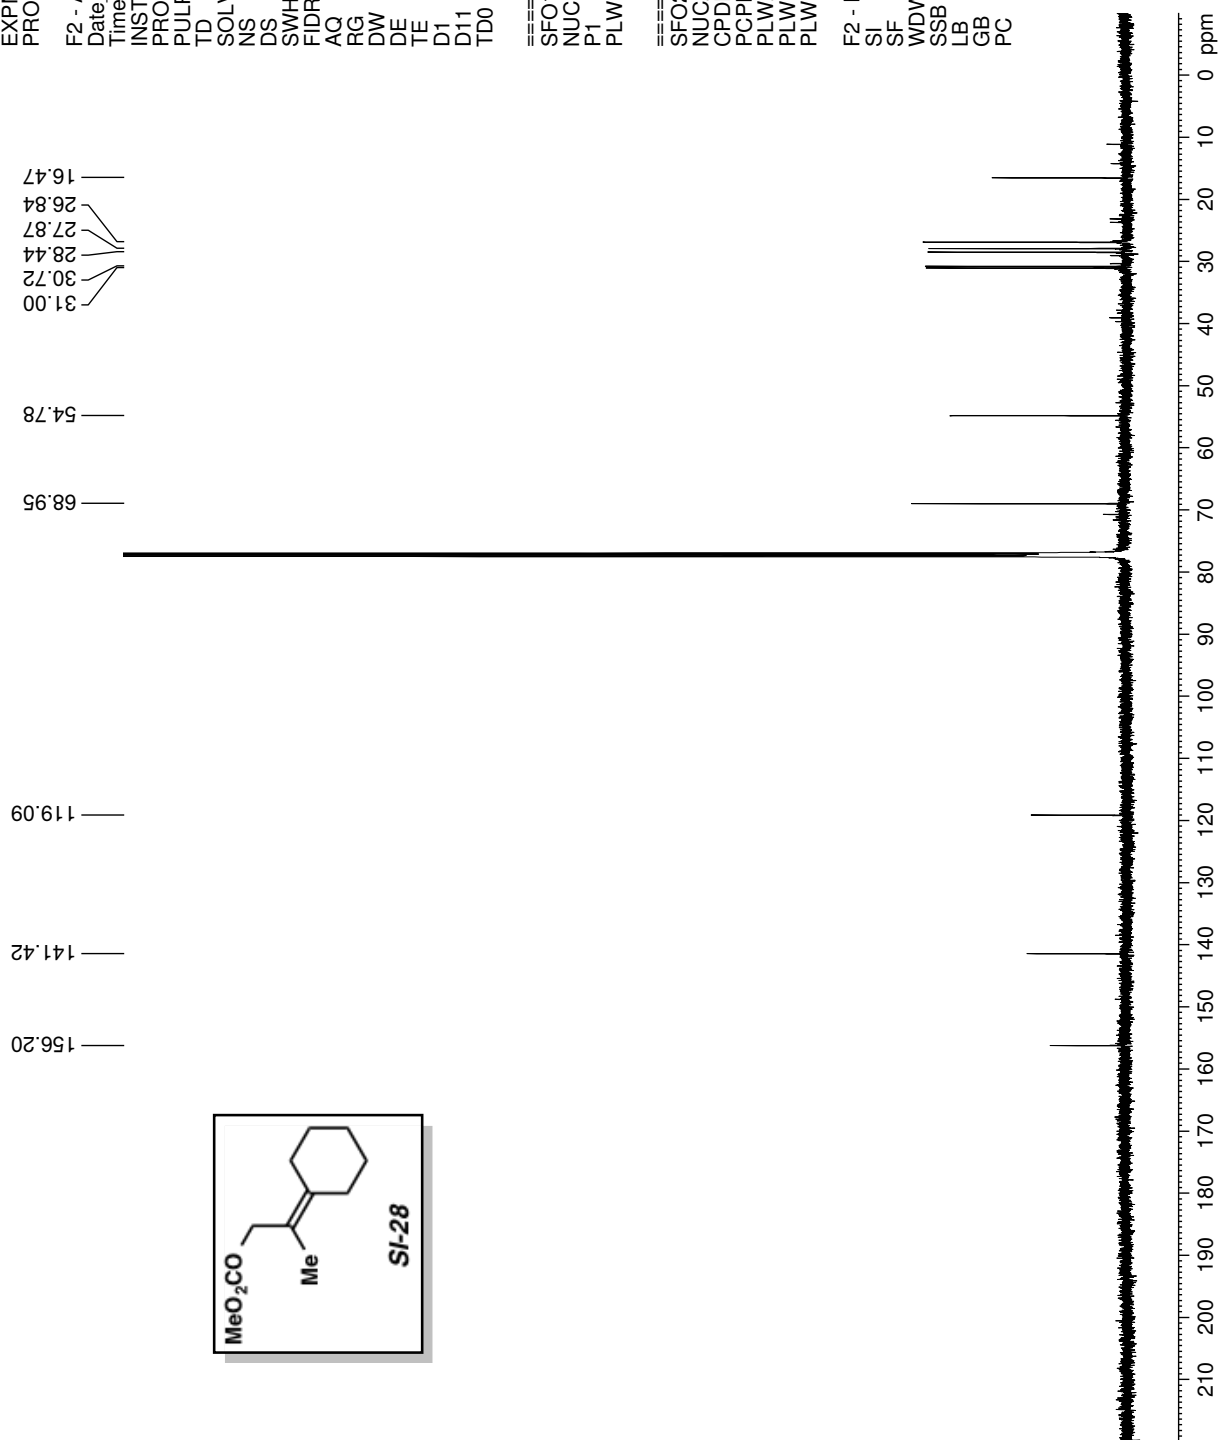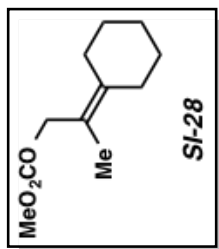

Current Data Parameters  
 NAME JMM-7-226  
 EXPNO 2  
 PROCNO 999

F2 - Acquisition Parameters  
 Date\_ 20170116  
 Time\_ 10.51  
 INSTRUM av500  
 PROBHD 5 mm DCH13C-1  
 PULPROG zgpg30  
 TD 65536

SOLVENT CDCl3  
 NS 103  
 DS 2  
 SWH 50000.000 Hz  
 FIDRES 0.762939 Hz  
 AQ 0.6553600 sec  
 RG 204.54  
 DW 10.000 usec  
 DE 100.00 usec  
 TE 298.0 K  
 D1 2.00000000 sec  
 D11 0.03000000 sec  
 TD0 1

==== CHANNEL f1 =====  
 SFO1 125.7766527 MHz  
 NUC1 13C  
 P1 9.63 usec  
 PLW1 23.00000000 W

==== CHANNEL f2 =====  
 SFO2 500.1330008 MHz  
 NUC2 1H  
 CPDPRG2 waltz16  
 PCPD2 80.00 usec  
 PLW2 13.50000000 W  
 PLW12 0.21094000 W  
 PLW13 0.13500001 W

F2 - Processing parameters  
 SI 131072  
 SF 125.7577892 MHz  
 WDW EM  
 SSB 0  
 LB 1.00 Hz  
 GB 0  
 PC 1.40

156.10  
 142.20  
 122.36  
 69.14  
 54.64  
 32.31  
 31.18  
 28.86  
 28.64  
 28.22  
 26.79  
 16.36

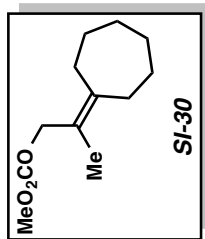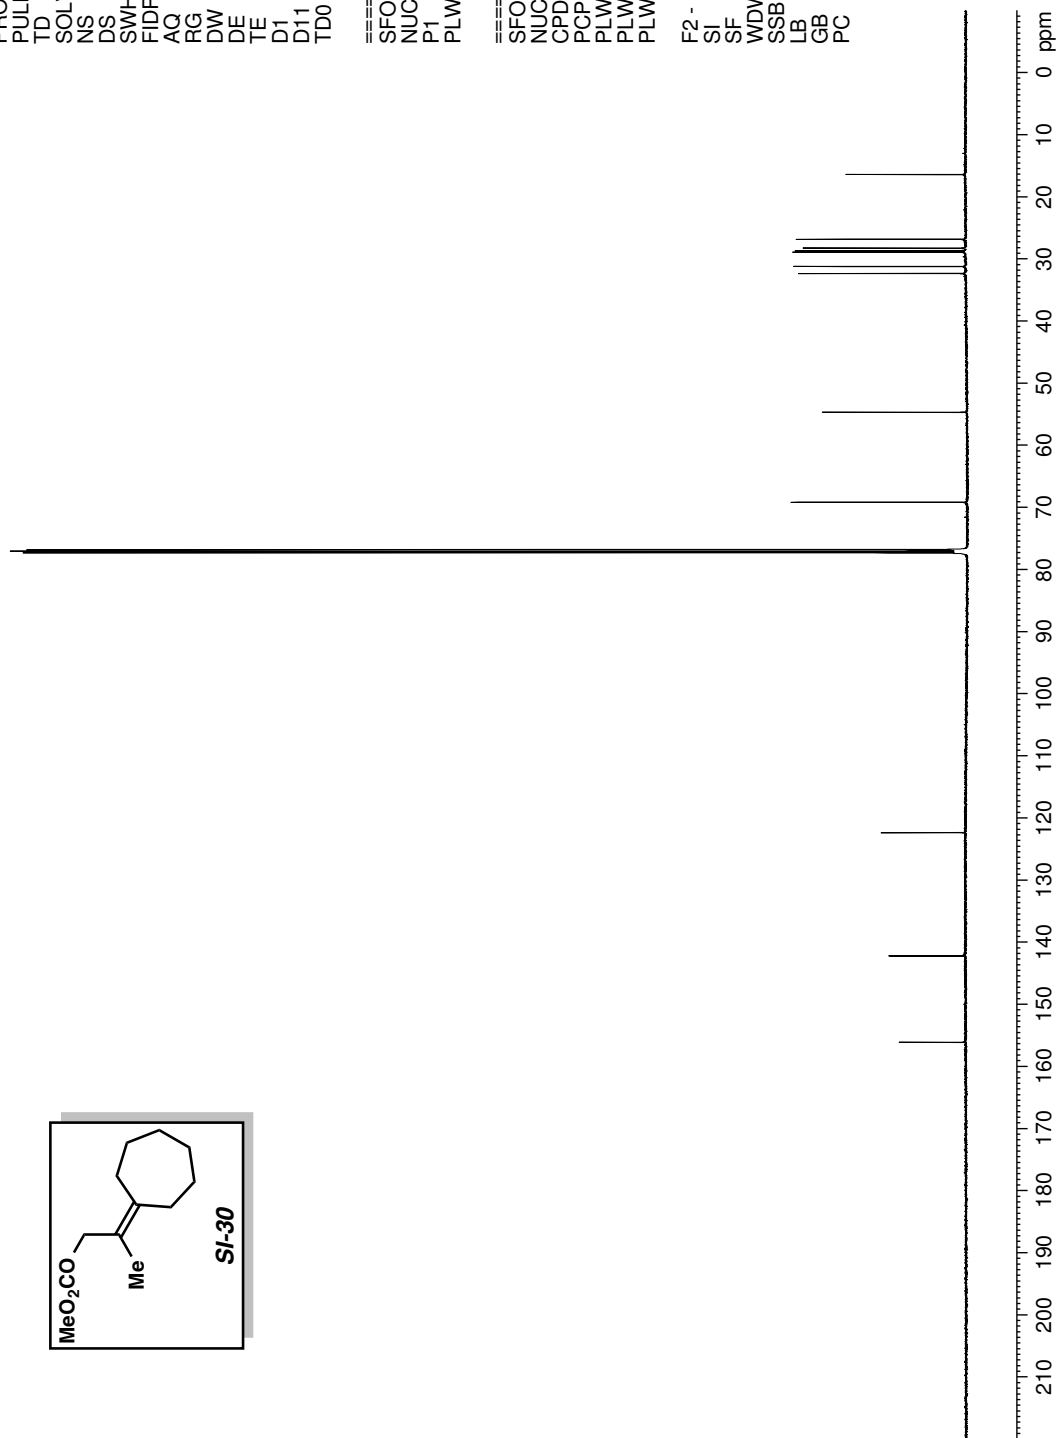

Current Data Parameters  
 NAME JM-4-281  
 EXPNO 101  
 PROCNO 1

F2 - Acquisition Parameters  
 Date\_ 20161216  
 Time\_ 10.39 h  
 INSTRUM av500  
 PROBHD Z119248\_0002 ( zppg30  
 PULPROG 65536  
 TD CDCI3  
 SOLVENT 48  
 NS 2  
 DS 31250.000 Hz  
 SWH 0.953674 Hz  
 FIDRES 1.0485760 sec  
 AQ 204.54  
 RG 16.000 usec  
 DW 18.000 usec  
 DE 298.0 K  
 TE 2.00000000 sec  
 D1 0.03000000 sec  
 D11 1  
 TD0 125.7722511 MHz  
 SFO1 13C  
 NUC1 10.50 usec  
 P1 23.00000000 W  
 PLW1 500.1330008 MHz  
 SFO2 1H  
 NUC2 waitz16  
 CPDPRG2 80.00 usec  
 PCPD2 13.50000000 W  
 PLW2 0.21094000 W  
 PLW12 0.10610000 W  
 PLW13

F2 - Processing parameters  
 SI 131072  
 SF 125.7577729 MHz  
 WDW EM  
 SSB 0  
 LB 1.00 Hz  
 GB 0  
 PC 1.40

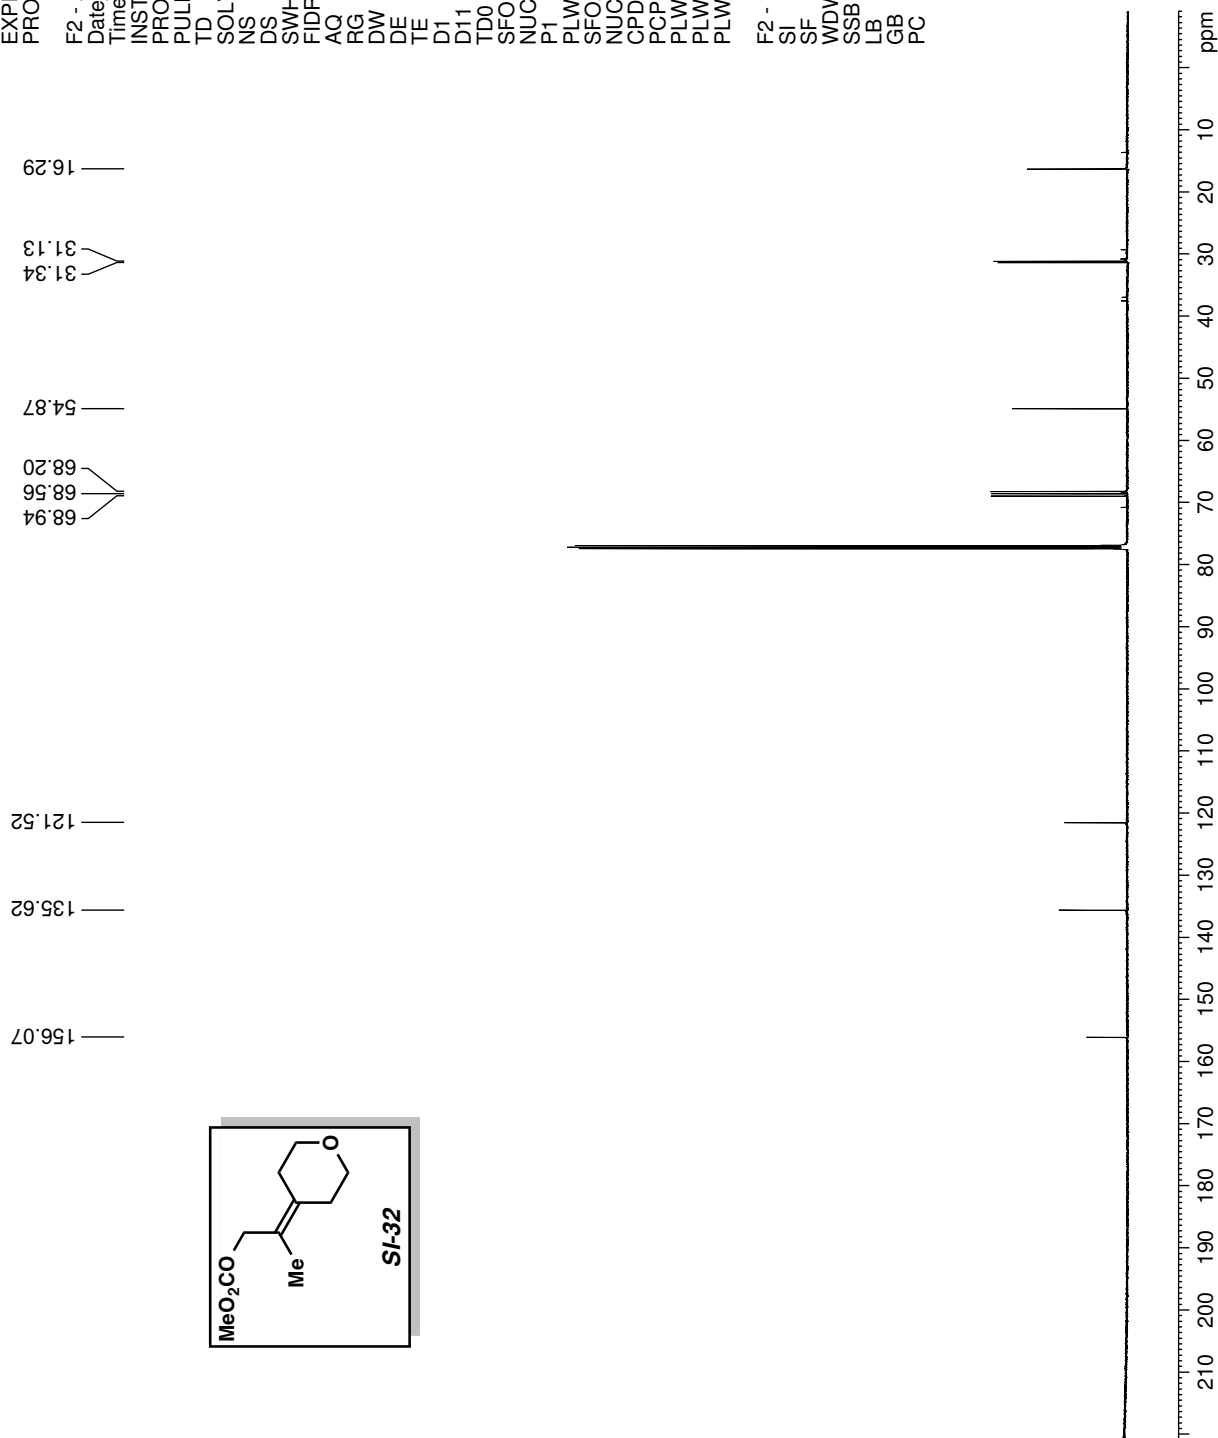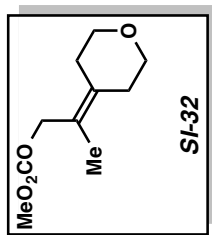

Current Data Parameters  
 NAME JM-4-287  
 EXPNO 101  
 PROCNO 1

F2 - Acquisition Parameters  
 Date\_ 20161216  
 Time\_ 10:28 h  
 INSTRUM av500  
 PROBHD Z119248\_0002 (  
 PULPROG zgpg30  
 TD 65536  
 SOLVENT CDCl3  
 NS 96  
 DS 2  
 SWH 31250.000 Hz  
 FIDRES 0.953674 Hz  
 AQ 1.0485760 sec  
 RG 204.54  
 DW 16.000 usec  
 DE 18.00 usec  
 TE 298.0 K  
 D1 2.00000000 sec  
 D11 0.03000000 sec  
 TD0 1  
 SFO1 125.7722511 MHz  
 NUC1 <sup>13</sup>C  
 P1 10.50 usec  
 PLW1 23.00000000 W  
 SFO2 500.1330008 MHz  
 NUC2 <sup>1</sup>H  
 CPDPRG2 waltz16  
 PCPD2 80.00 usec  
 PLW2 13.50000000 W  
 PLW12 0.21094000 W  
 PLW13 0.10610000 W

F2 - Processing parameters  
 SI 131072  
 SF 125.7577740 MHz  
 WDW EM  
 SSB 0  
 LB 1.00 Hz  
 GB 0  
 PC 1.40

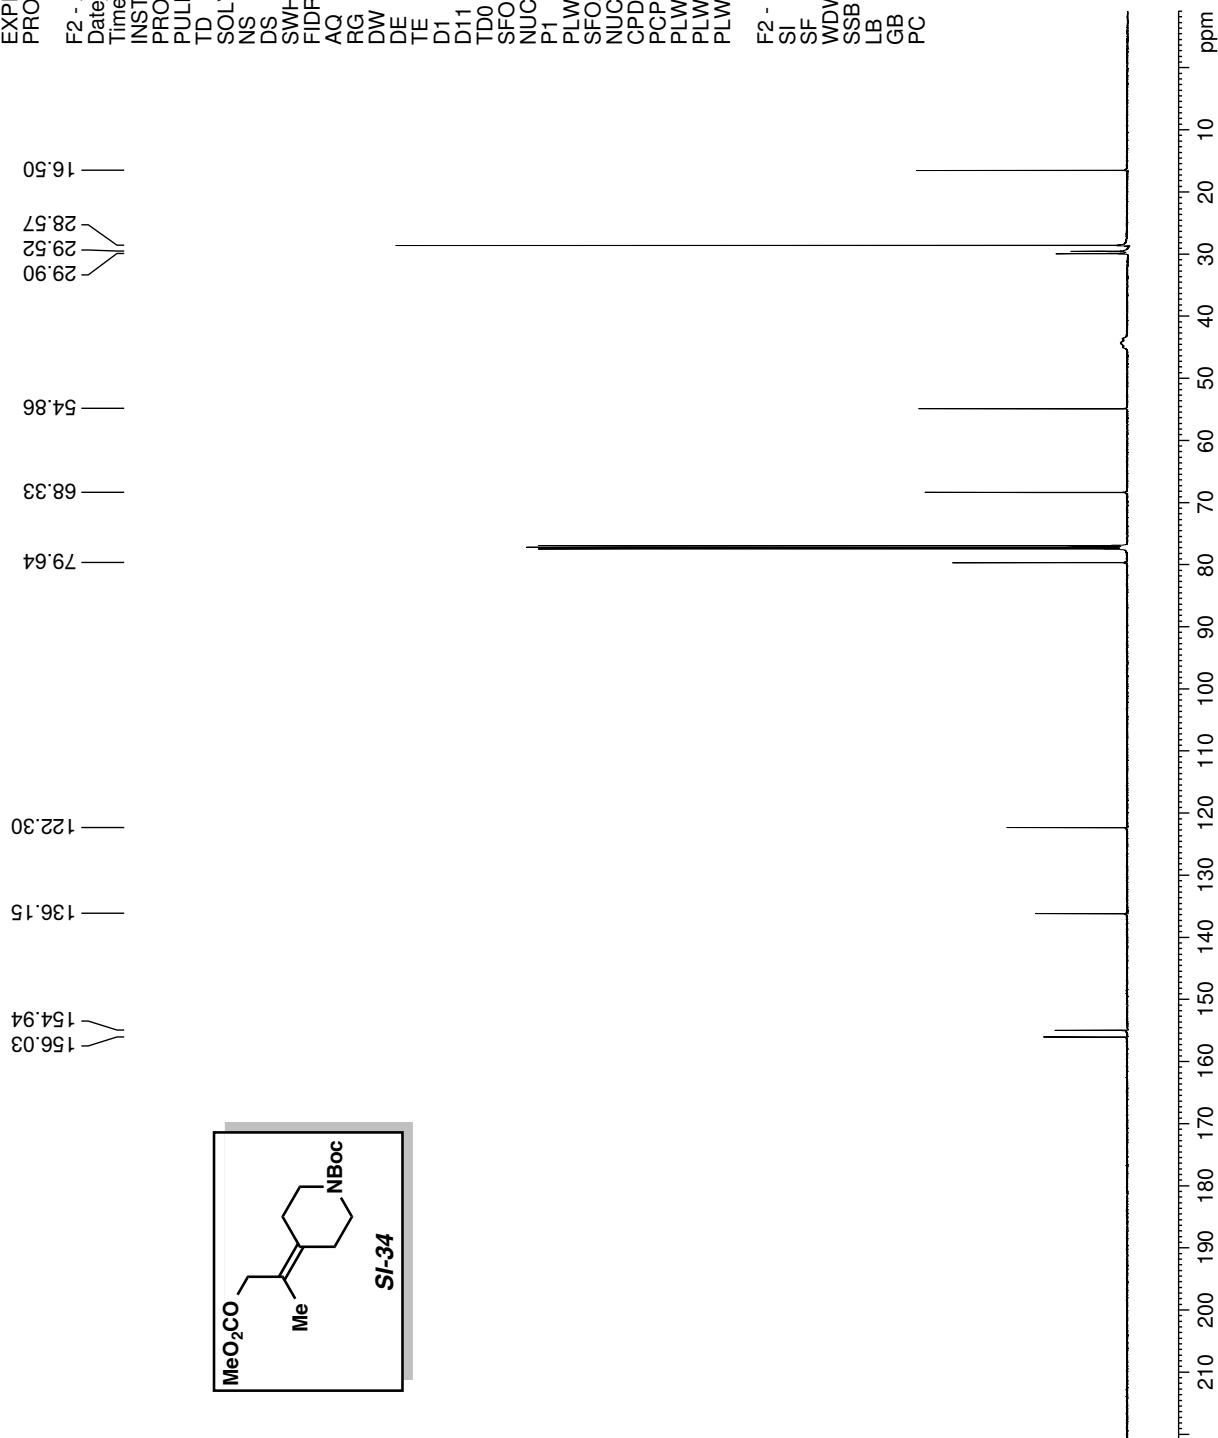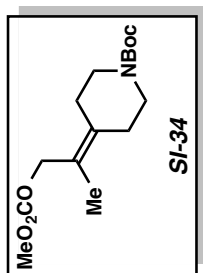



Current Data Parameters  
 NAME sr-1-099.500  
 EXPNO 4  
 PROCNO 1

F2 - Acquisition Parameters  
 Date\_ 20170130  
 Time\_ 9.21 h  
 INSTRUM av500  
 PROBHD Z119248\_0002 ( zjppg30  
 PULPROG zgpg30  
 TD 65536  
 SOLVENT CDCl3  
 NS 256  
 DS 2  
 SWH 31250.000 Hz  
 FIDRES 0.953674 Hz  
 AQ 1.0485760 sec  
 RG 204.54  
 DW 16.000 usec  
 DE 18.00 usec  
 TE 298.0 K  
 D1 2.00000000 sec  
 D11 0.03000000 sec  
 TD0 1  
 SFO1 125.7722511 MHz  
 NUC1 13C  
 P1 10.50 usec  
 PLW1 23.00000000 W  
 SFO2 500.1330008 MHz  
 NUC2 1H  
 CPDPRG2 waltz16  
 PCPD2 80.00 usec  
 PLW2 13.50000000 W  
 PLW12 0.21094000 W  
 PLW13 0.10610000 W

F2 - Processing parameters  
 SI 131072  
 SF 125.7577640 MHz  
 WDW EM  
 SSB 0  
 LB 1.00 Hz  
 GB 0  
 PC 1.40

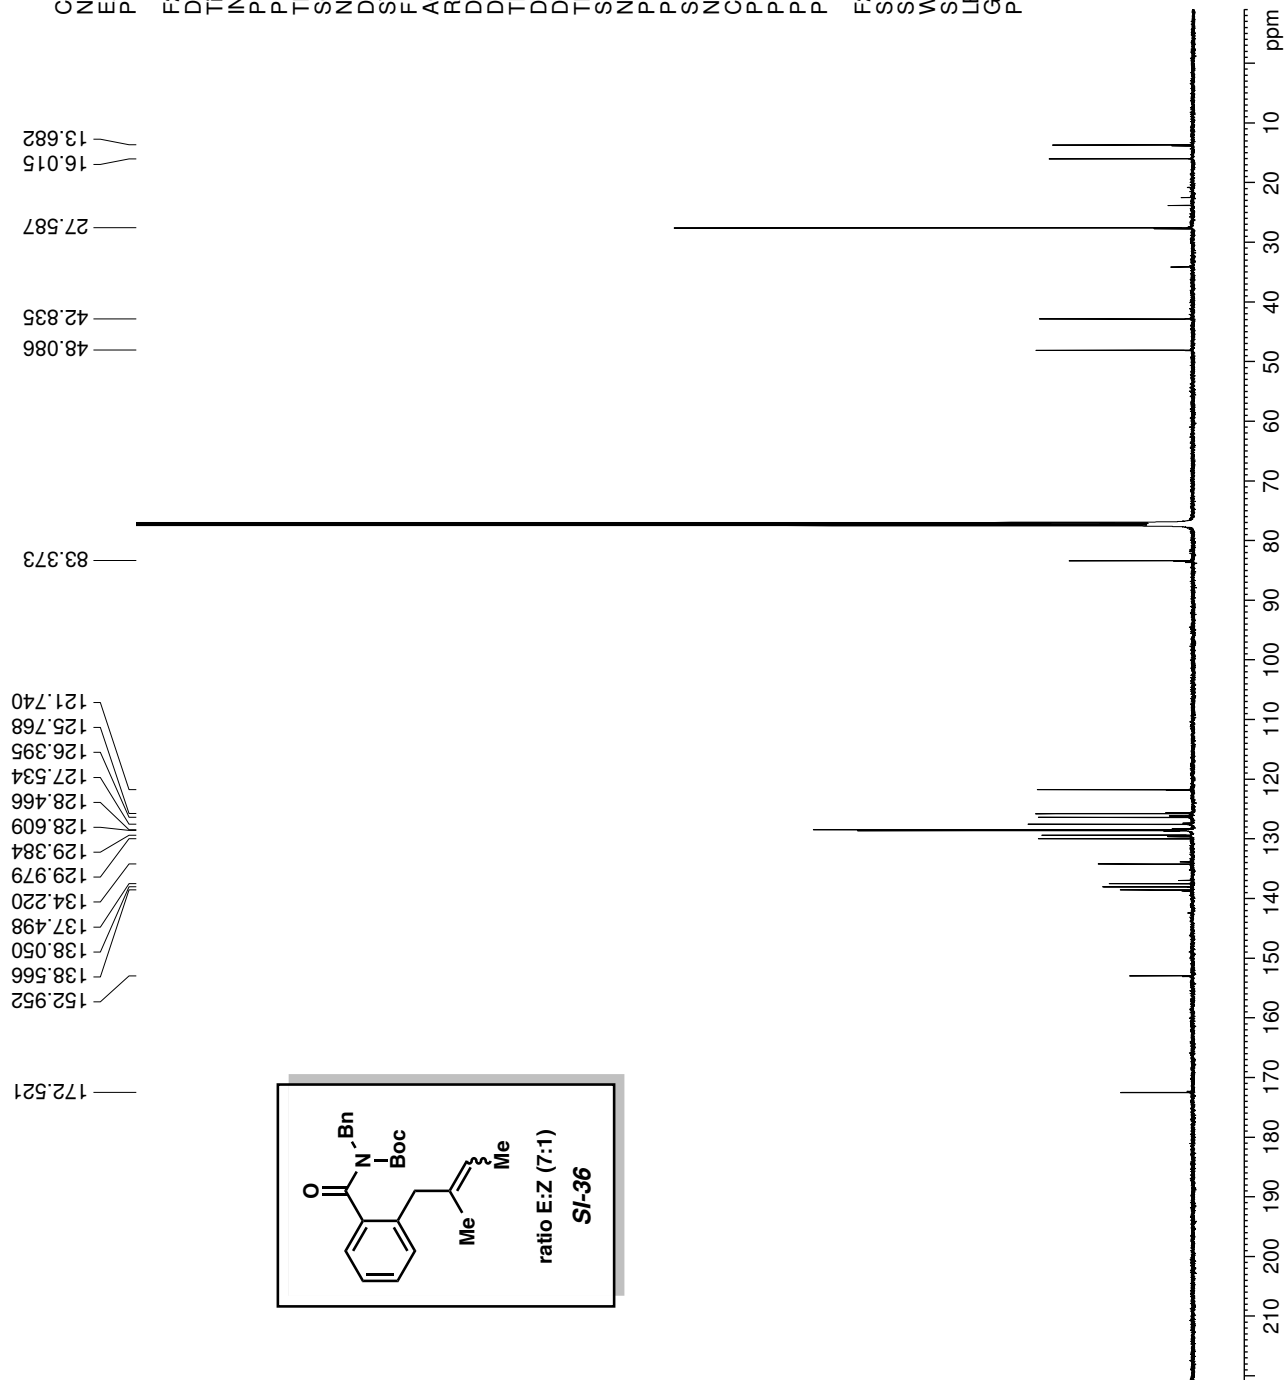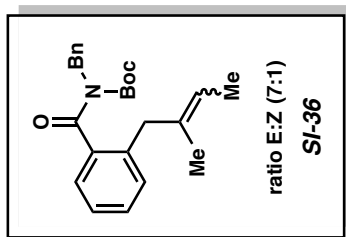

```

Current Data Parameters
NAME      JMM-7-221-char
EXPNO    2
PROCNO   999

F2 - Acquisition Parameters
Date_    20170131
Time     10.14
INSTRUM  av500
PROBHD   5 mm DCH 13C-1
PULPROG  zgpg30
TD       65536
SOLVENT  CDCl3
NS       86
DS       2
SWH      50000.000 Hz
FIDRES   0.762939 Hz
AQ       0.6553600 sec
RG       204.54
DW       10.000 usec
DE       18.00 usec
TE       298.0 K
D1       2.00000000 sec
D11      0.030000000 sec
TD0      1

===== CHANNEL f1 =====
SFO1     125.7766527 MHz
NUC1     13C
P1       9.63 usec
PLW1     23.00000000 W

===== CHANNEL f2 =====
SFO2     500.1330008 MHz
NUC2     1H
CPDPRG2  waltz16
PCPD2    80.00 usec
PLW2     13.50000000 W
PLW12    0.21094000 W
PLW13    0.13500001 W

F2 - Processing parameters
SI       131072
SF       125.7577730 MHz
WDW      EM
SSB      0
LB       1.00 Hz
GB       0
PC       1.40
    
```

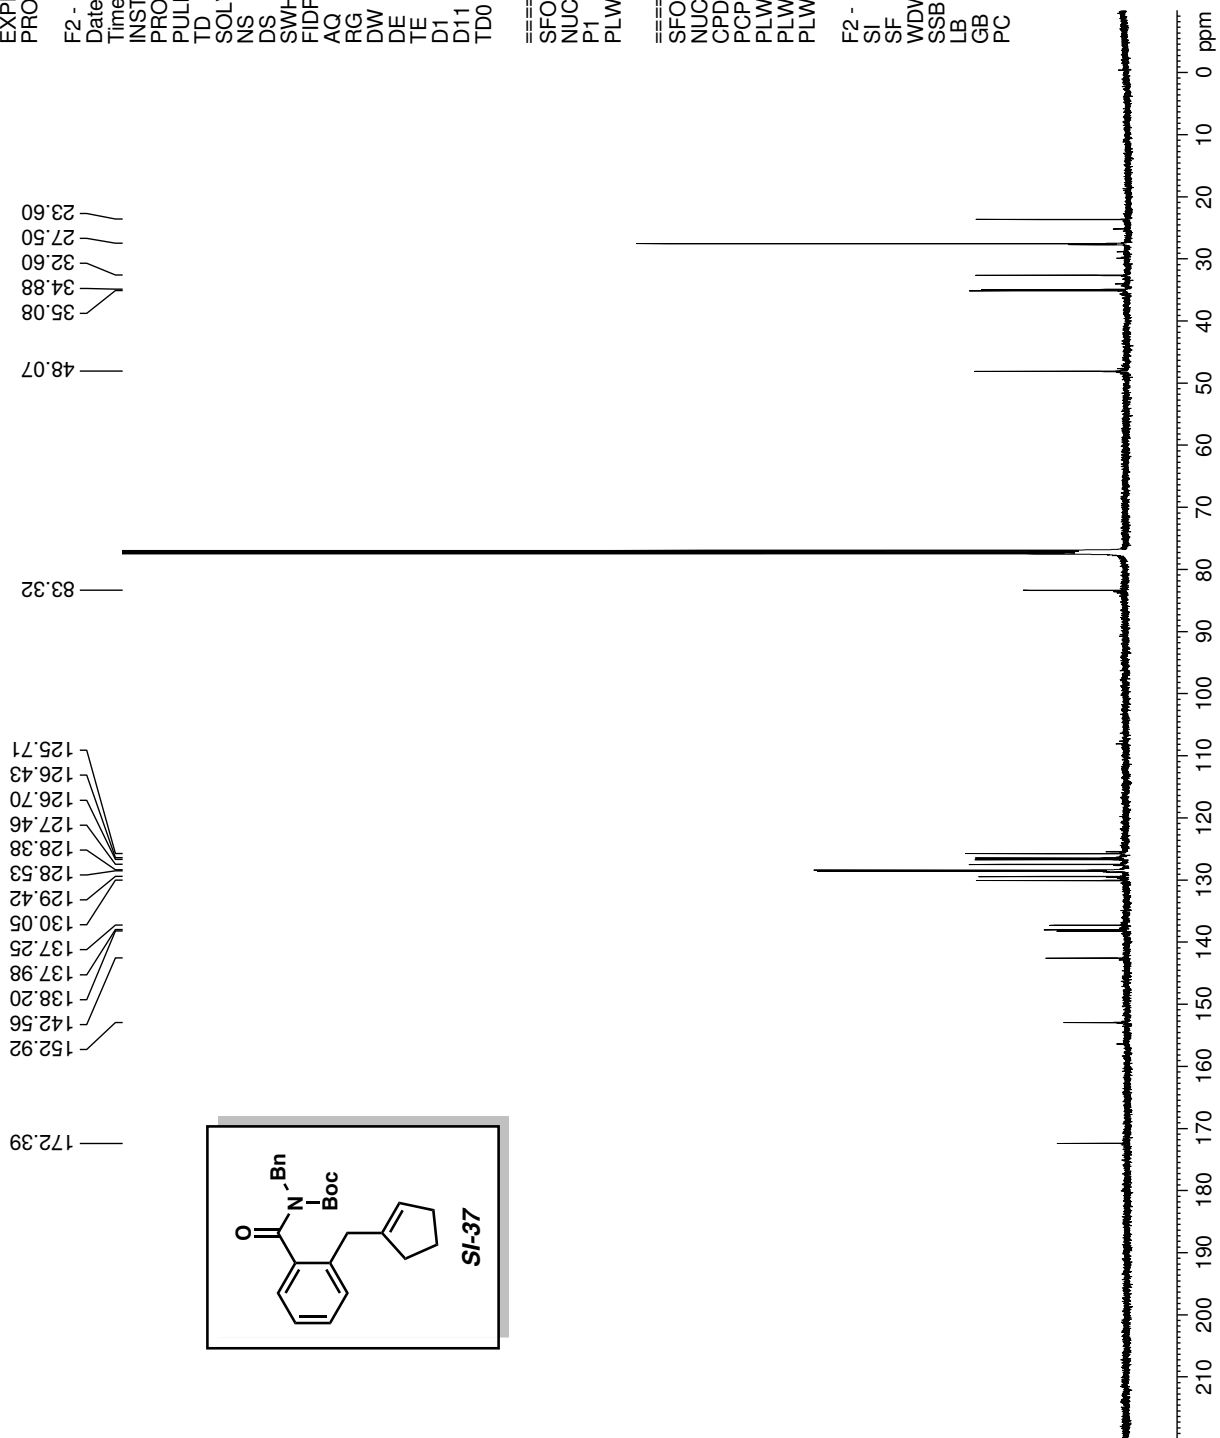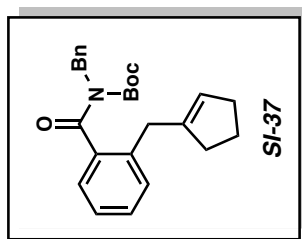

Current Data Parameters  
 NAME JM-4-295  
 EXPNO 101  
 PROCNO 1

F2 - Acquisition Parameters  
 Date\_ 20161218  
 Time 10.31 h  
 INSTRUM av500  
 PROBHD Z119248\_0002 (  
 PULPROG zgpg30  
 TD 65536  
 SOLVENT CDCI3  
 NS 80  
 DS 2  
 SWH 31250.000 Hz  
 FIDRES 0.953674 Hz  
 AQ 1.0485760 sec  
 RG 204.54  
 DW 16.000 usec  
 DE 18.00 usec  
 TE 298.0 K  
 D1 2.00000000 sec  
 D11 0.03000000 sec  
 TD0 1  
 SFO1 125.7722511 MHz  
 NUC1 13C  
 P1 10.50 usec  
 PLW1 23.00000000 W  
 SFO2 500.1330008 MHz  
 NUC2 1H  
 CPDPRG2 waltz16  
 PCPD2 80.00 usec  
 PLW2 13.50000000 W  
 PLW12 0.21094000 W  
 PLW13 0.10610000 W

F2 - Processing parameters  
 SI 131072  
 SF 125.7577726 MHz  
 WDW EM  
 SSB 0  
 LB 1.00 Hz  
 GB 0  
 PC 1.40

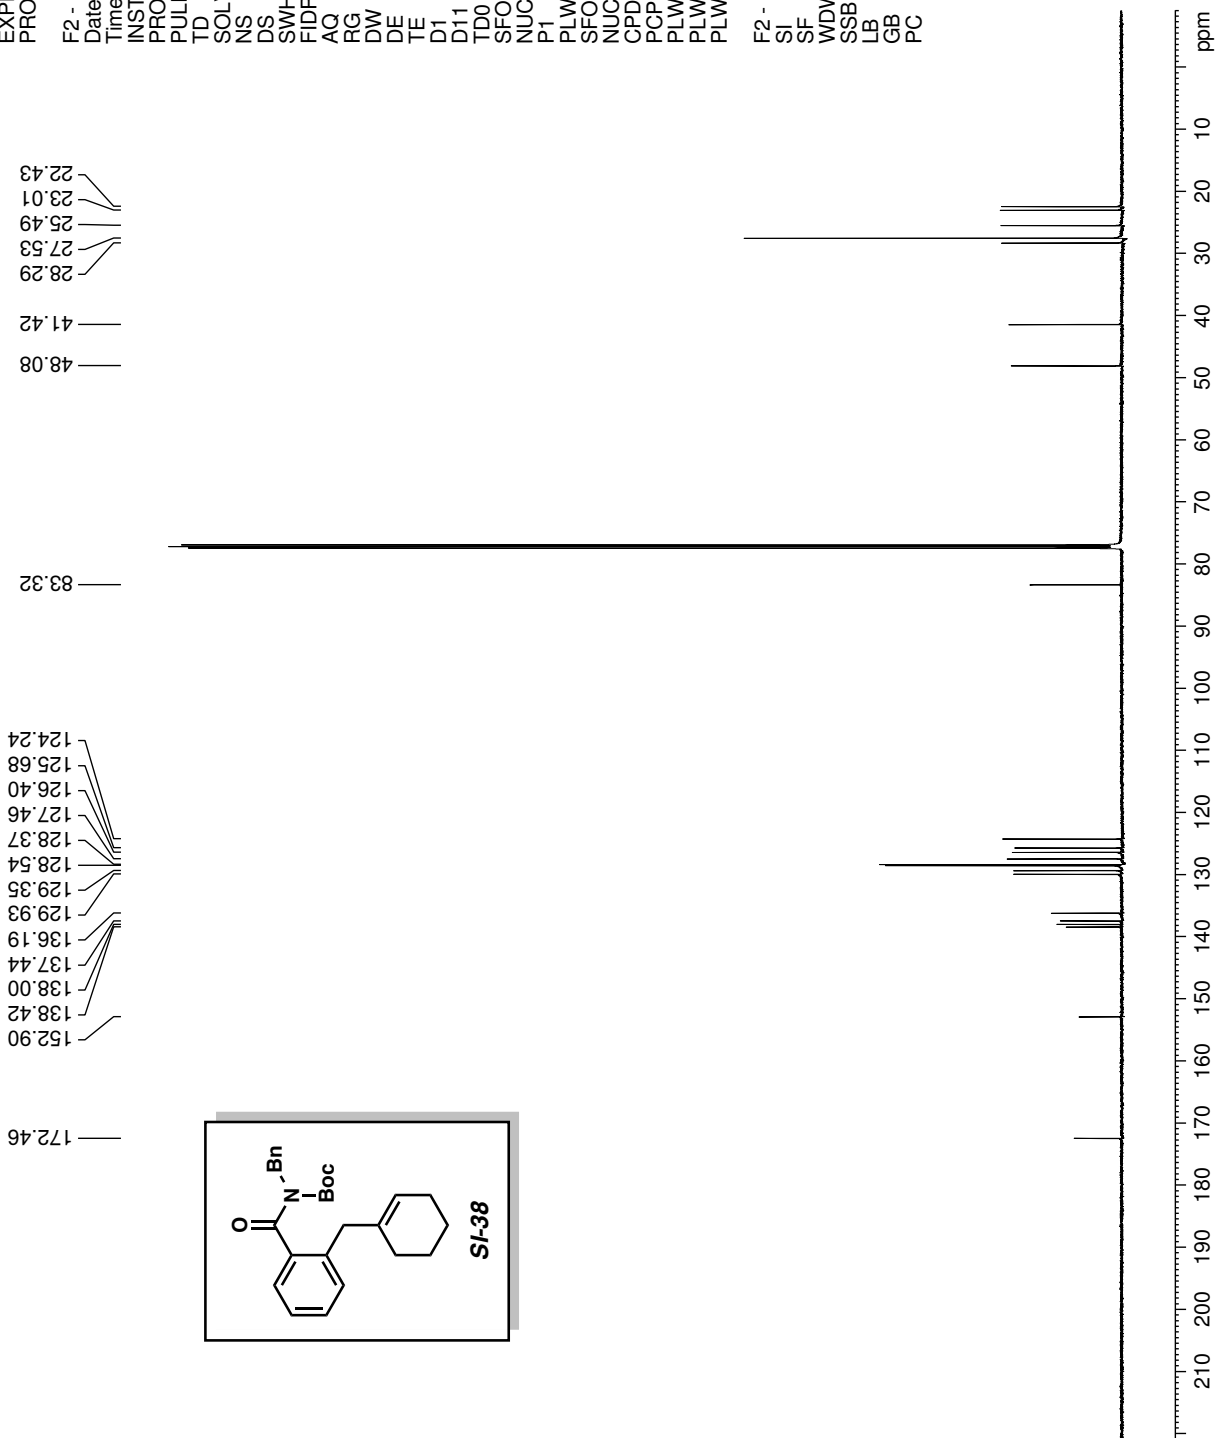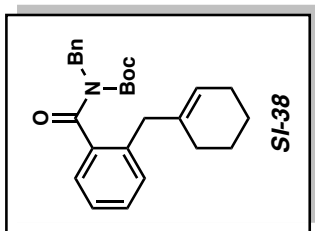

```

Current Data Parameters
NAME      JMM-7-134(c)
EXPNO    2
PROCNO   1

F2 - Acquisition Parameters
Date_    20160907
Time     9.36
INSTRUM  av500
PROBHD   5 mm DCH 13C-1
PULPROG  zgpg30
TD        65536
SOLVENT  CDCl3
NS        71
DS        2
SWH       43859.648 Hz
FIDRES    0.669245 Hz
AQ        0.7471104 sec
RG        204.54
DW        11.400 usec
DE        100.00 usec
TE        298.0 K
D1        2.00000000 sec
D11       0.03000000 sec
TD0       1

===== CHANNEL f1 =====
SFO1     125.7741375 MHz
NUC1     13C
P1       9.63 usec
PLW1     23.00000000 W

===== CHANNEL f2 =====
SFO2     500.1330008 MHz
NUC2     1H
CPDPRG2  waltz16
PCPD2    80.00 usec
PLW2     13.50000000 W
PLW12    0.21094000 W
PLW13    0.13500001 W

F2 - Processing parameters
SI       131072
SF       125.7577720 MHz
WDW      EM
SSB      0
LB       3.00 Hz
GB       0
PC       1.40
    
```

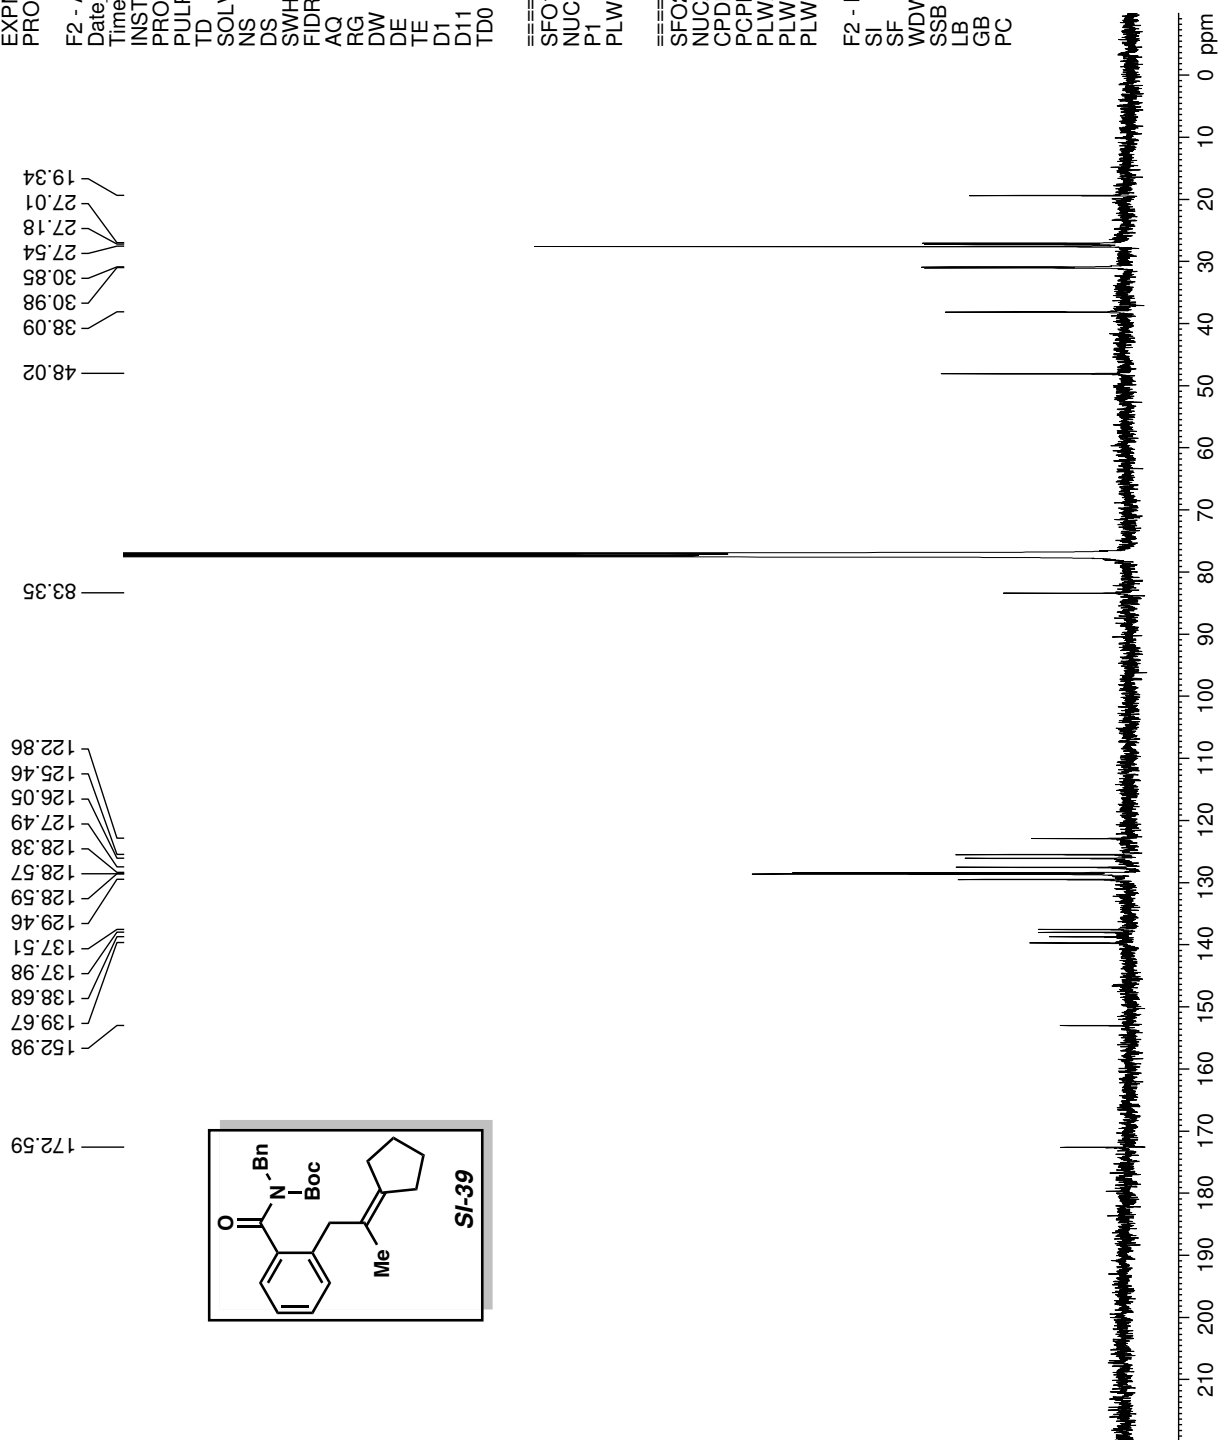

Current Data Parameters  
 NAME JMM-7-135(c)  
 EXPNO 2  
 PROCNO 1

F2 - Acquisition Parameters  
 Date\_ 20160907  
 Time 9.46  
 INSTRUM av500  
 PROBHD 5 mm DCH 13C-1  
 PULPROG zgpg30  
 TD 65536  
 SOLVENT CDCl3  
 NS 61  
 DS 2  
 SWH 43859.648 Hz  
 FIDRES 0.669245 Hz  
 AQ 0.7471104 sec  
 RG 204.54  
 DW 11.400 usec  
 DE 18.00 usec  
 TE 298.0 K  
 D1 2.00000000 sec  
 D11 0.03000000 sec  
 TD0 1

=====  
 CHANNEL f1 =====  
 SFO1 125.7741375 MHz  
 NUC1 13C  
 P1 9.63 usec  
 PLW1 23.00000000 W

=====  
 CHANNEL f2 =====  
 SFO2 500.1330008 MHz  
 NUC2 1H  
 CPDPRG2 waltz16  
 PCPD2 80.00 usec  
 PLW2 13.50000000 W  
 PLW12 0.21094000 W  
 PLW13 0.13500001 W

F2 - Processing parameters  
 SI 131072  
 SF 125.757721 MHz  
 WDW EM  
 SSB 0  
 LB 1.00 Hz  
 GB 0  
 PC 1.40

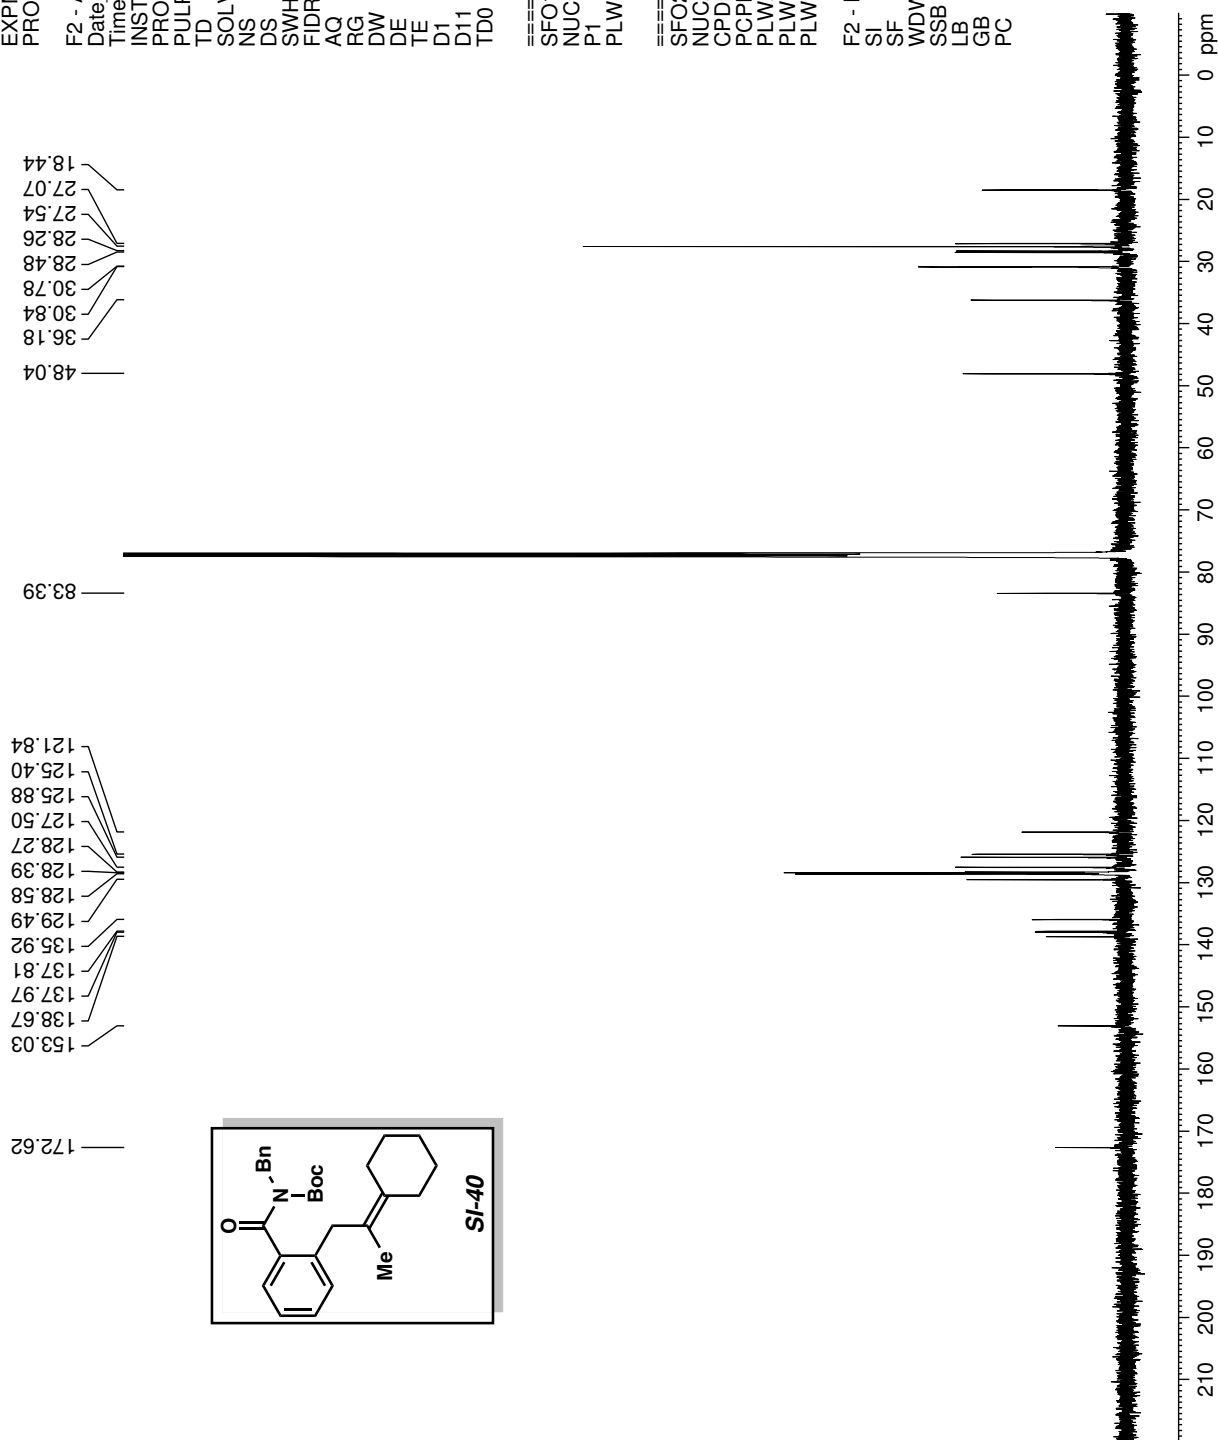

Current Data Parameters  
 NAME JMM-7-223-char  
 EXPNO 2  
 PROCNO 999

F2 - Acquisition Parameters  
 Date\_ 20170117  
 Time\_ 21.07  
 INSTRUM av500  
 PROBHD 5 mm DCH 13C-1  
 PULPROG zgpg30  
 TD 65536  
 SOLVENT CDCl3  
 NS 565  
 DS 2  
 SWH 50000.000 Hz  
 FIDRES 0.762939 Hz  
 AQ 0.6553600 sec  
 RG 204.54  
 DW 10.000 usec  
 DE 18.00 usec  
 TE 298.0 K  
 D1 2.00000000 sec  
 D11 0.03000000 sec  
 TD0 1

=====  
 CHANNEL f1 =====  
 SFO1 125.7766527 MHz  
 NUC1 13C  
 P1 9.63 usec  
 PLW1 23.00000000 W

=====  
 CHANNEL f2 =====  
 SFO2 500.1330008 MHz  
 NUC2 1H  
 CPDPRG2 waltz16  
 PCPD2 80.00 usec  
 PLW2 13.50000000 W  
 PLW12 0.21094000 W  
 PLW13 0.13500001 W

F2 - Processing parameters  
 SI 131072  
 SF 125.757714 MHz  
 WDW EM  
 SSB 0  
 LB 0  
 GB 0  
 PC 1.40

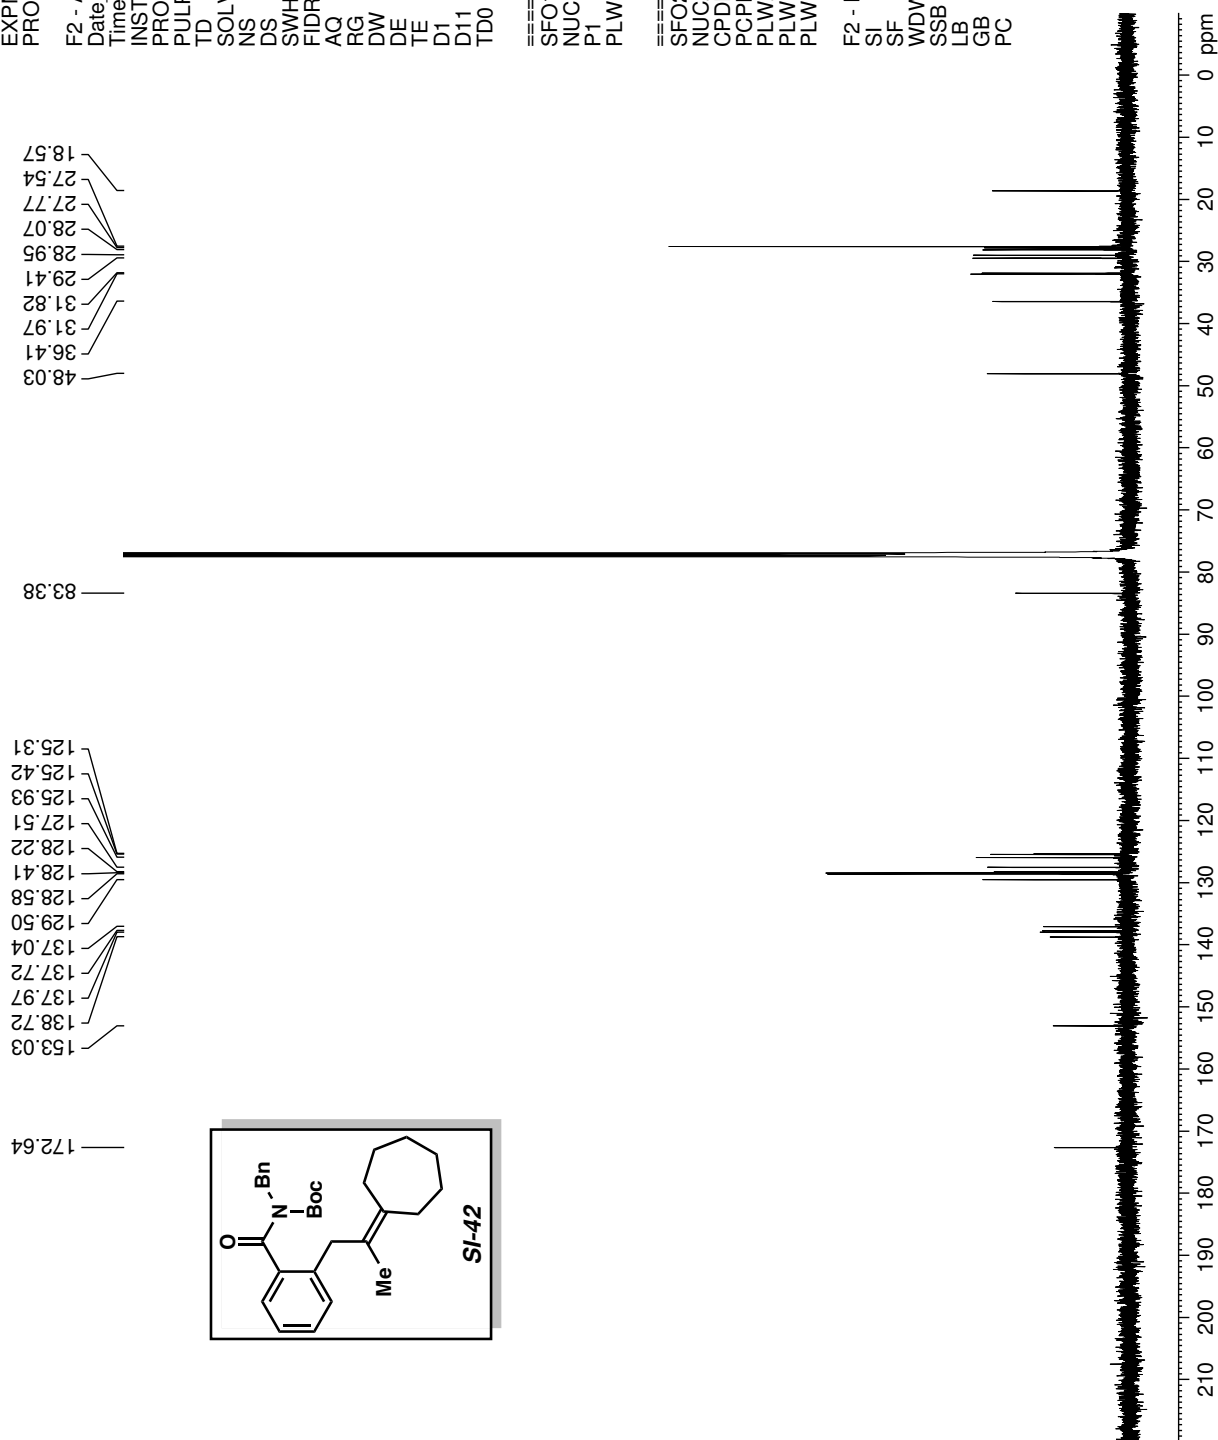

Current Data Parameters  
 NAME JM-4-288  
 EXPNO 11  
 PROCNO 1

F2 - Acquisition Parameters  
 Date\_ 20161205  
 Time 15:33 h  
 INSTRUM av500  
 PROBHD Z119248\_0002 (  
 PULPROG zgpg30  
 TD 65536  
 SOLVENT CDCl3  
 NS 480  
 DS 2  
 SWH 31250.000 Hz  
 FIDRES 0.953674 Hz  
 AQ 1.0485760 sec  
 RG 204.54  
 DW 16.000 usec  
 DE 18.00 usec  
 TE 298.0 K  
 D1 2.00000000 sec  
 D11 0.03000000 sec  
 TDO 1  
 SFO1 125.7722511 MHz  
 NUC1 13C  
 P1 10.50 usec  
 PLW1 23.00000000 W  
 SFO2 500.1330008 MHz  
 NUC2 1H  
 CPDPRG2 waltz16  
 PCPD2 80.00 usec  
 PLW2 13.50000000 W  
 PLW12 0.21094000 W  
 PLW13 0.10610000 W

F2 - Processing parameters  
 SI 131072  
 SF 125.7577718 MHz  
 WDW EM  
 SSB 0  
 LB 1.00 Hz  
 GB 0  
 PC 1.40

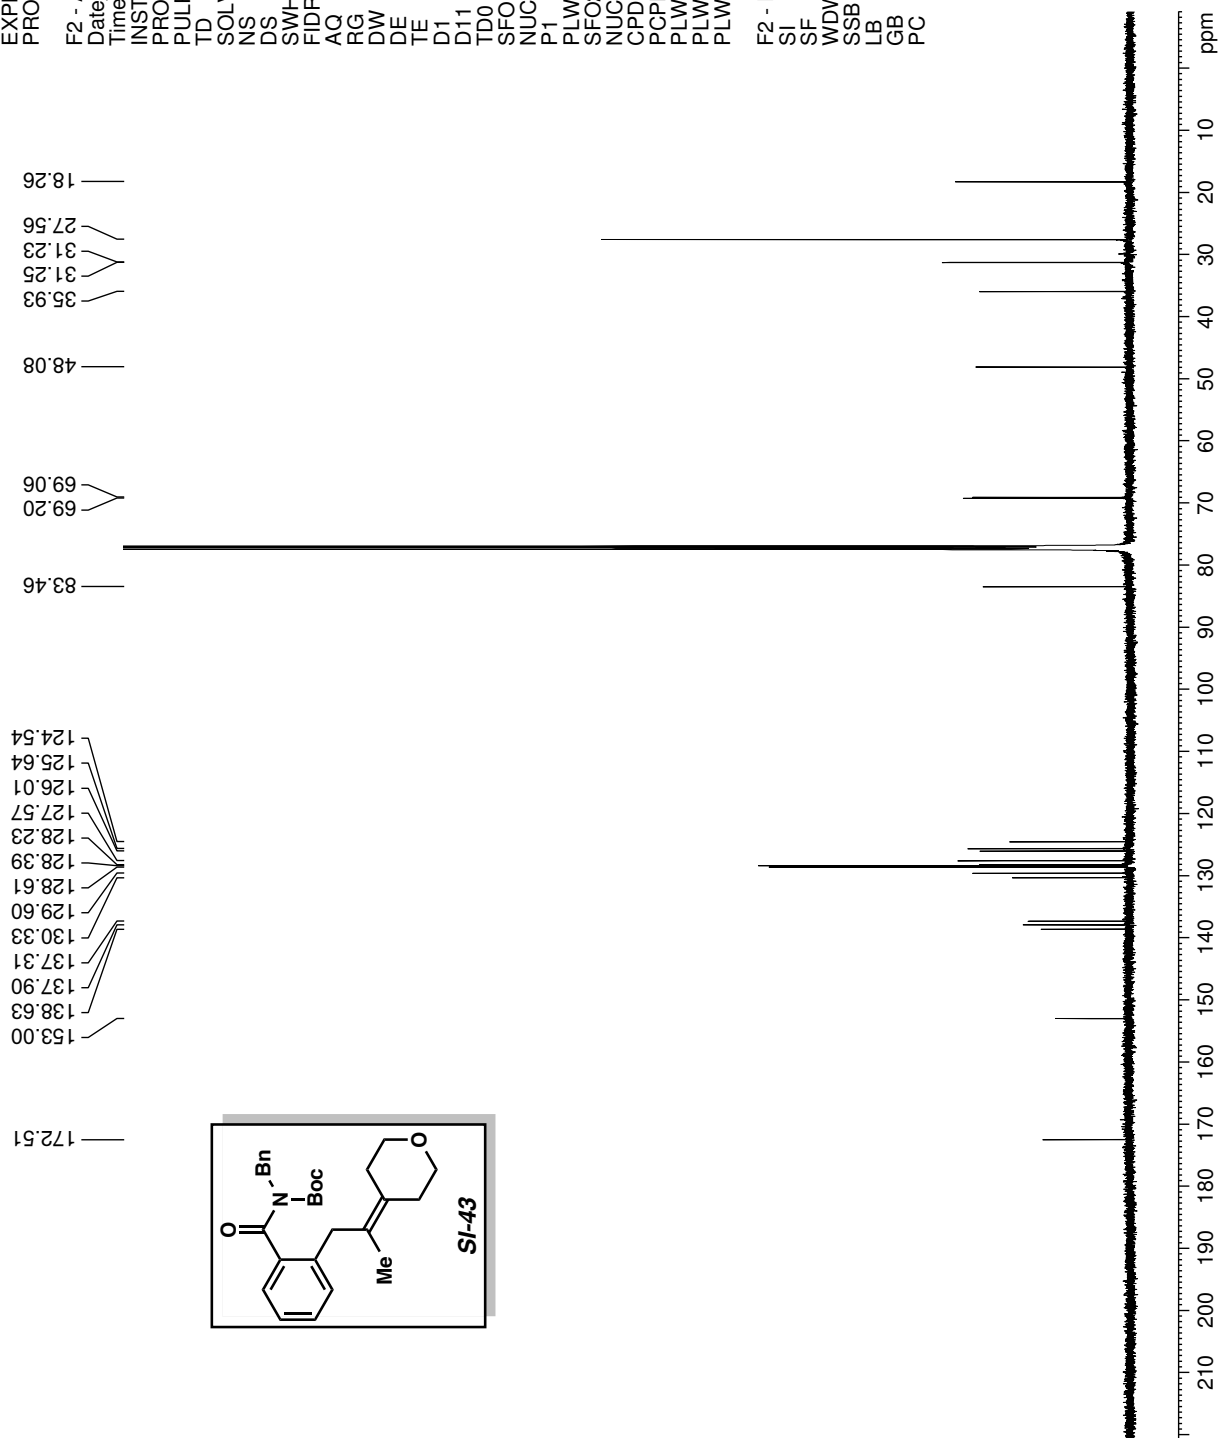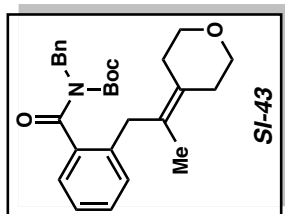

Current Data Parameters  
 NAME JM-4-290  
 EXPNO 101  
 PROCNO 1

F2 - Acquisition Parameters  
 Date\_ 20161218  
 Time\_ 14.58 h  
 INSTRUM av500  
 PROBHD Z119248\_0002 (  
 PULPROG zgpg30  
 TD 65536  
 SOLVENT CDCl3  
 NS 480  
 DS 2  
 SWH 31250.000 Hz  
 FIDRES 0.953674 Hz  
 AQC 1.0485760 sec  
 RG 204.54  
 DW 16.000 usec  
 DE 18.000 usec  
 TE 298.0 K  
 D1 2.00000000 sec  
 D11 0.03000000 sec  
 TD0 1  
 SFO1 125.7722511 MHz  
 NUC1 13C  
 P1 10.50 usec  
 PLW1 23.00000000 W  
 SFO2 500.1330008 MHz  
 NUC2 1H  
 CPDPRG2 waltz16  
 PCPD2 80.00 usec  
 PLW2 13.50000000 W  
 PLW12 0.21094000 W  
 PLW13 0.10610000 W

F2 - Processing parameters  
 SI 131072  
 SF 125.7577718 MHz  
 WDW EM  
 SSB 0  
 LB 1.00 Hz  
 GB 0  
 PC 1.40

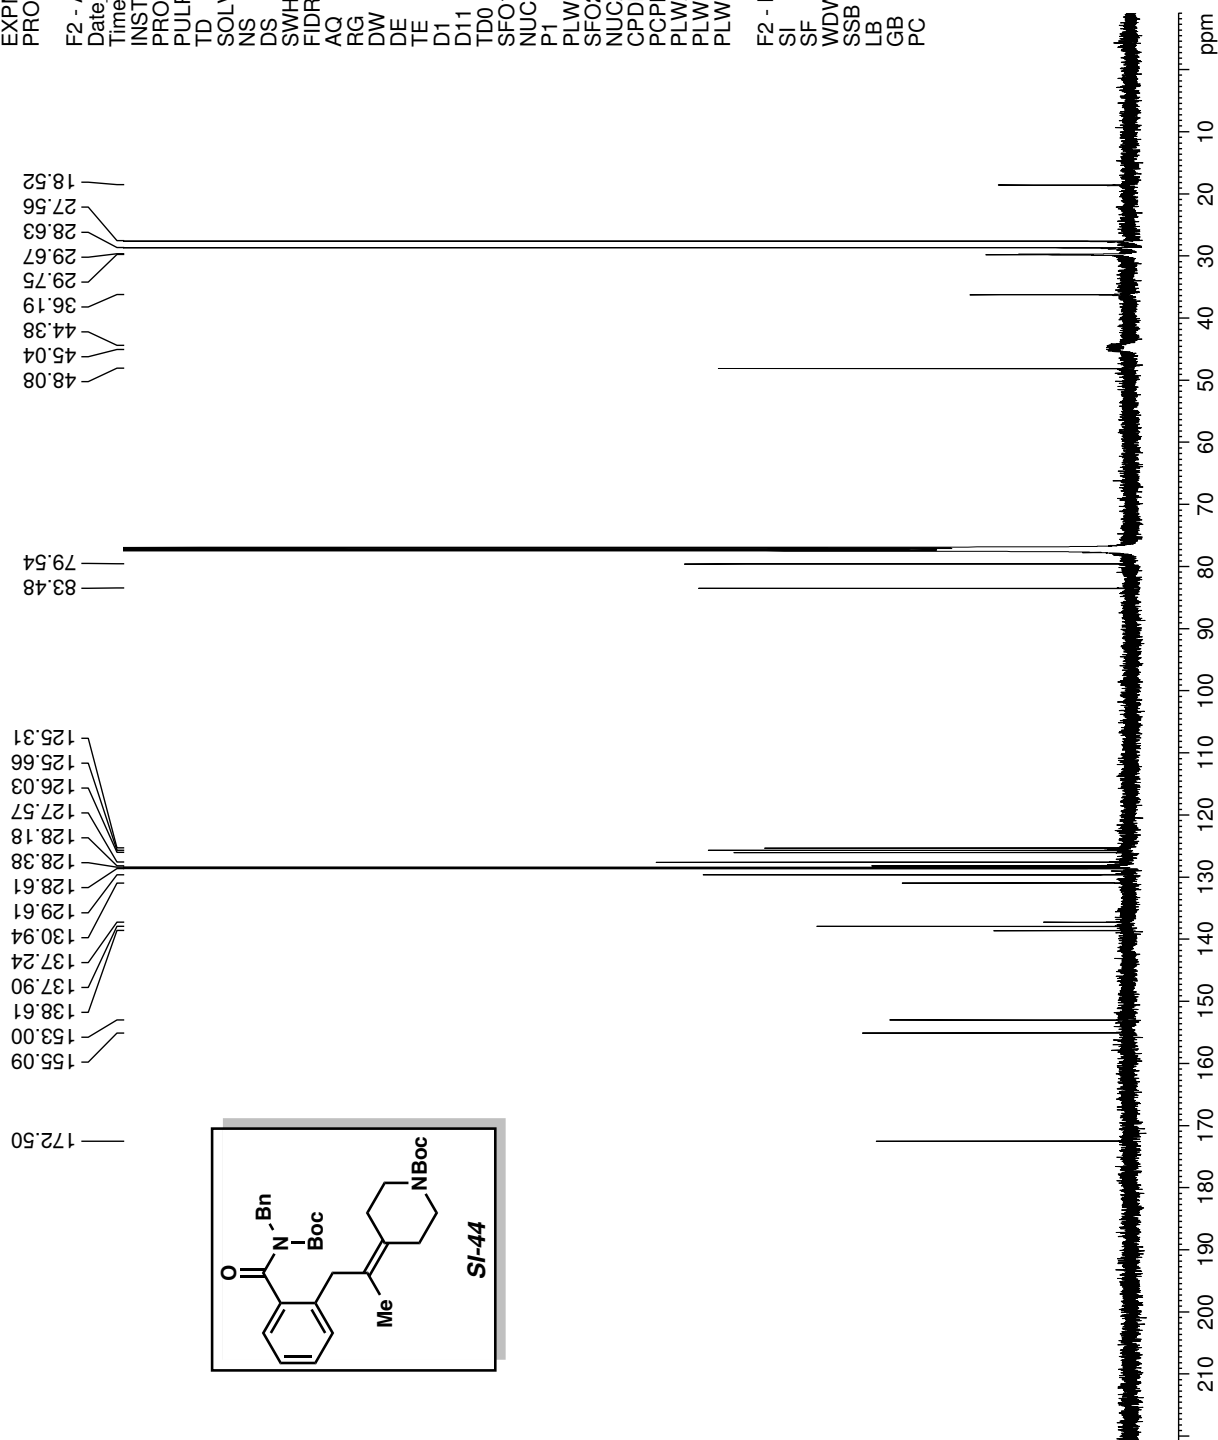



Current Data Parameters  
 NAME JM-5-067  
 EXPNO 101  
 PROCNO 1

F2 - Acquisition Parameters  
 Date\_ 20170217  
 Time\_ 18.09 h  
 INSTRUM av500  
 PROBHD Z119248\_0002 ( )  
 PULPROG zgpg30  
 TD 65536  
 SOLVENT CDCI3  
 NS 80  
 DS 2  
 SWH 31250.000 Hz  
 FIDRES 0.953674 Hz  
 AQ 1.0485760 sec  
 RG 204.54  
 DW 16.000 usec  
 DE 18.00 usec  
 TE 298.0 K  
 D1 2.00000000 sec  
 D11 0.03000000 sec  
 TD0 1  
 SFO1 125.7722511 MHz  
 NUC1 13C  
 P1 10.50 usec  
 PLW1 23.00000000 W  
 SFO2 500.1330008 MHz  
 NUC2 1H  
 CPDPRG2 waltz16  
 PCPD2 80.00 usec  
 PLW2 13.50000000 W  
 PLW12 0.21094000 W  
 PLW13 0.10610000 W

F2 - Processing parameters  
 SI 131072  
 SF 125.7577725 MHz  
 WDW EM  
 SSB 0  
 LB 1.00 Hz  
 GB 0  
 PC 1.40

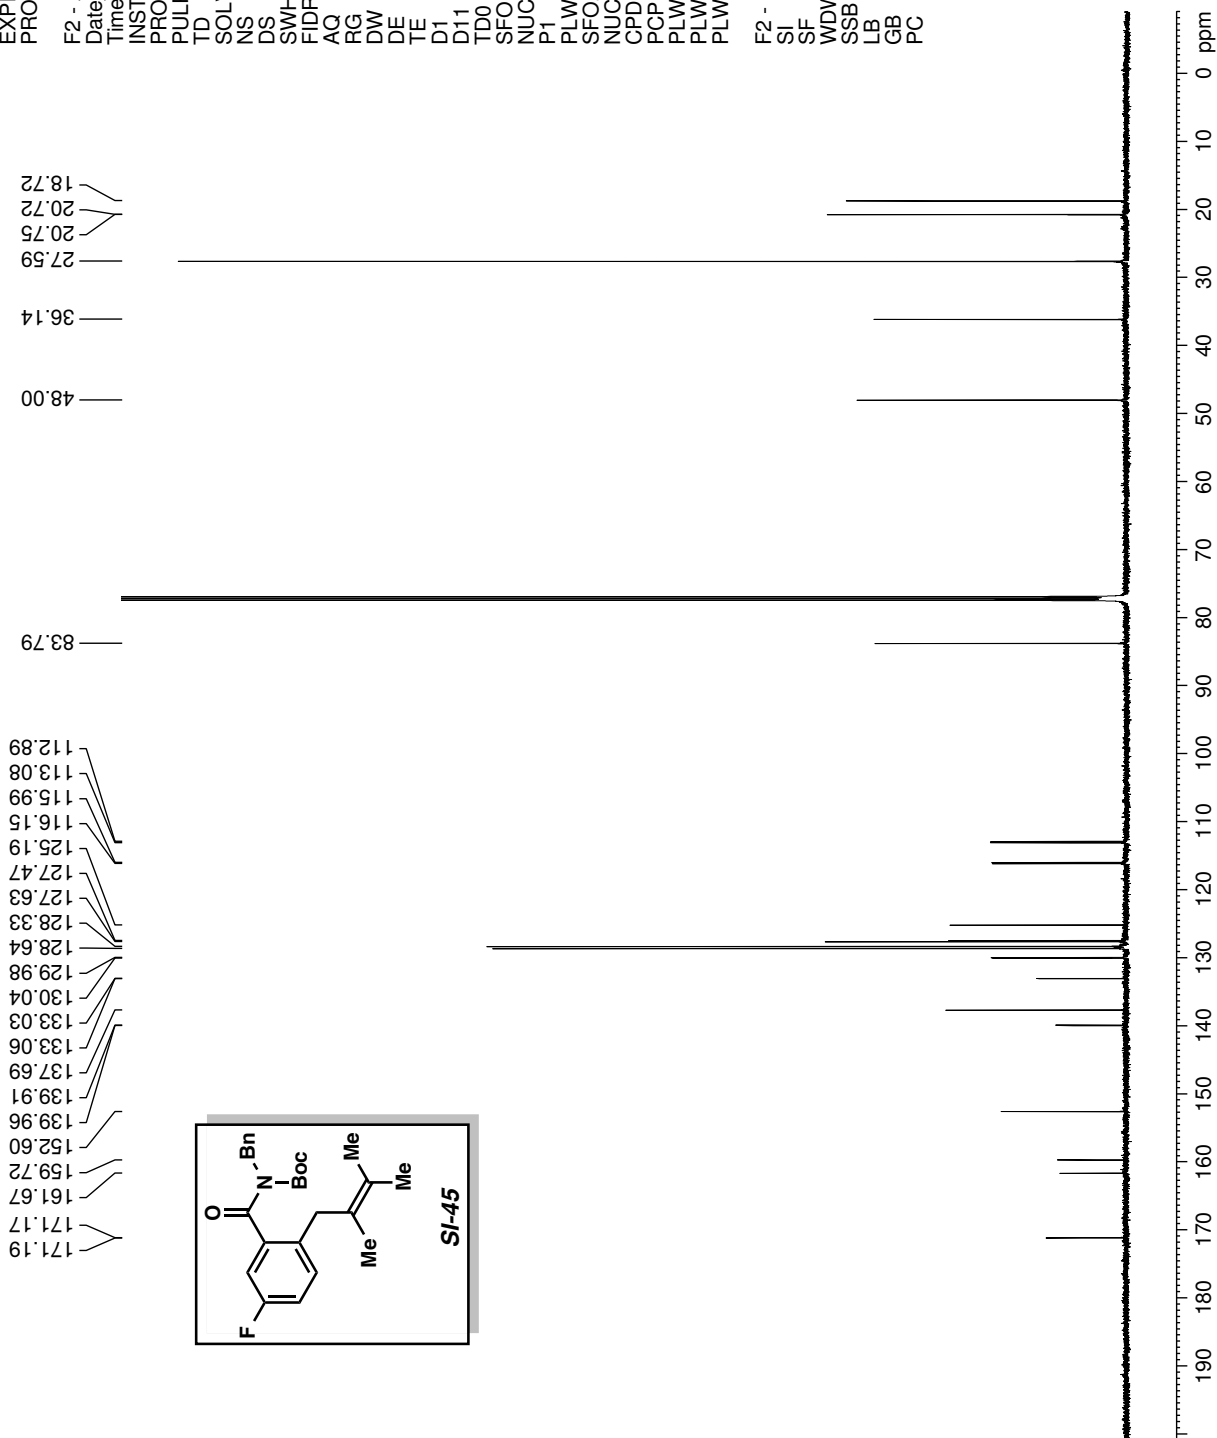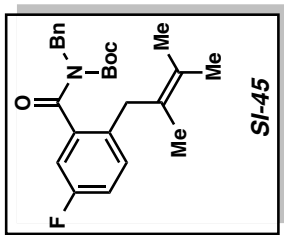

Current Data Parameters  
 NAME JM-5-055  
 EXPNO 201  
 PROCNO 1

F2 - Acquisition Parameters  
 Date\_ 20170206  
 Time 19:20 h  
 INSTRUM av500  
 PROBHD Z119248\_0002 (  
 PULPROG zgpg30  
 TD 65536  
 SOLVENT CDCl3  
 NS 192  
 DS 2  
 SWH 31250.000 Hz  
 FIDRES 0.953674 Hz  
 AQ 1.0485760 sec  
 RG 204.54  
 DW 16.000 usec  
 DE 18.00 usec  
 TE 298.0 K  
 D1 2.00000000 sec  
 D11 0.030000000 sec  
 TD0 1  
 SFO1 125.7722511 MHz  
 NUC1 13C  
 P1 10.50 usec  
 PLW1 23.00000000 W  
 SFO2 500.1330008 MHz  
 NUC2 1H  
 CPDPRG2 waltz16  
 PCPD2 80.00 usec  
 PLW2 13.50000000 W  
 PLW12 0.21094000 W  
 PLW13 0.10610000 W

F2 - Processing parameters  
 SI 131072  
 SF 125.7577723 MHz  
 WDW EM  
 SSB 0  
 LB 0  
 GB 0  
 PC 1.40

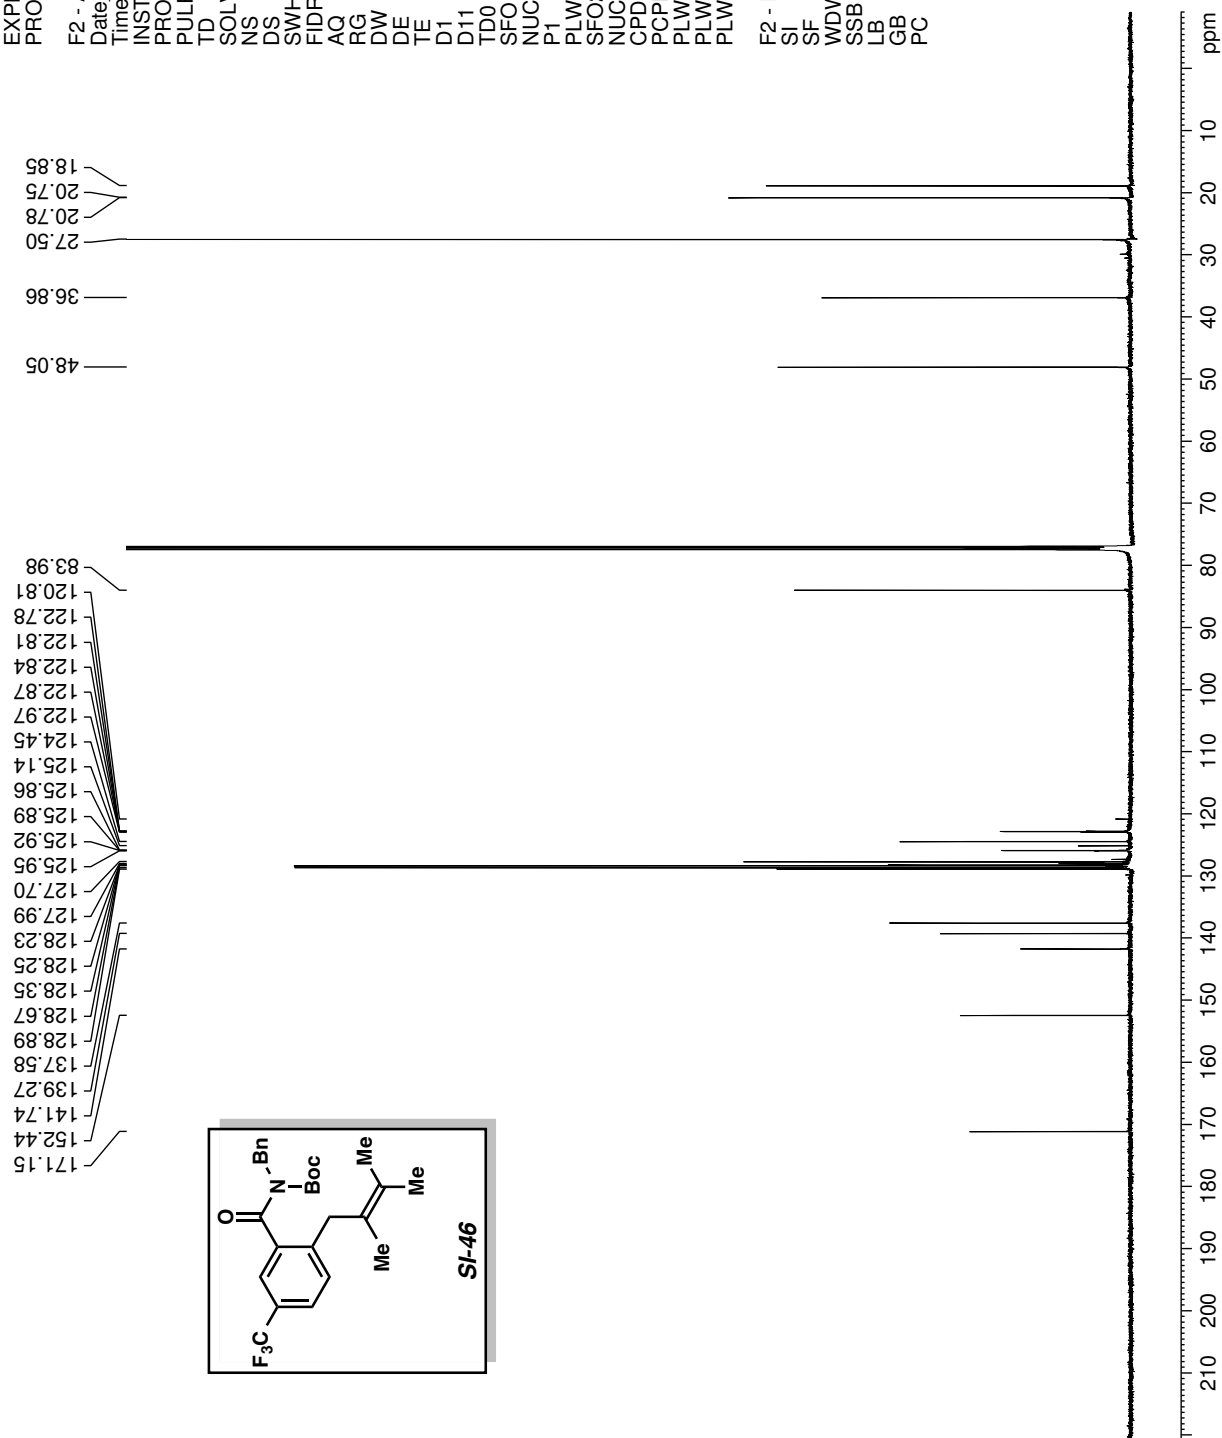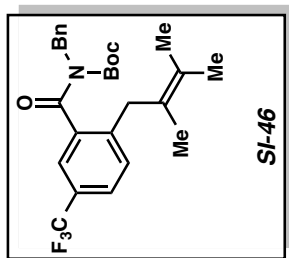

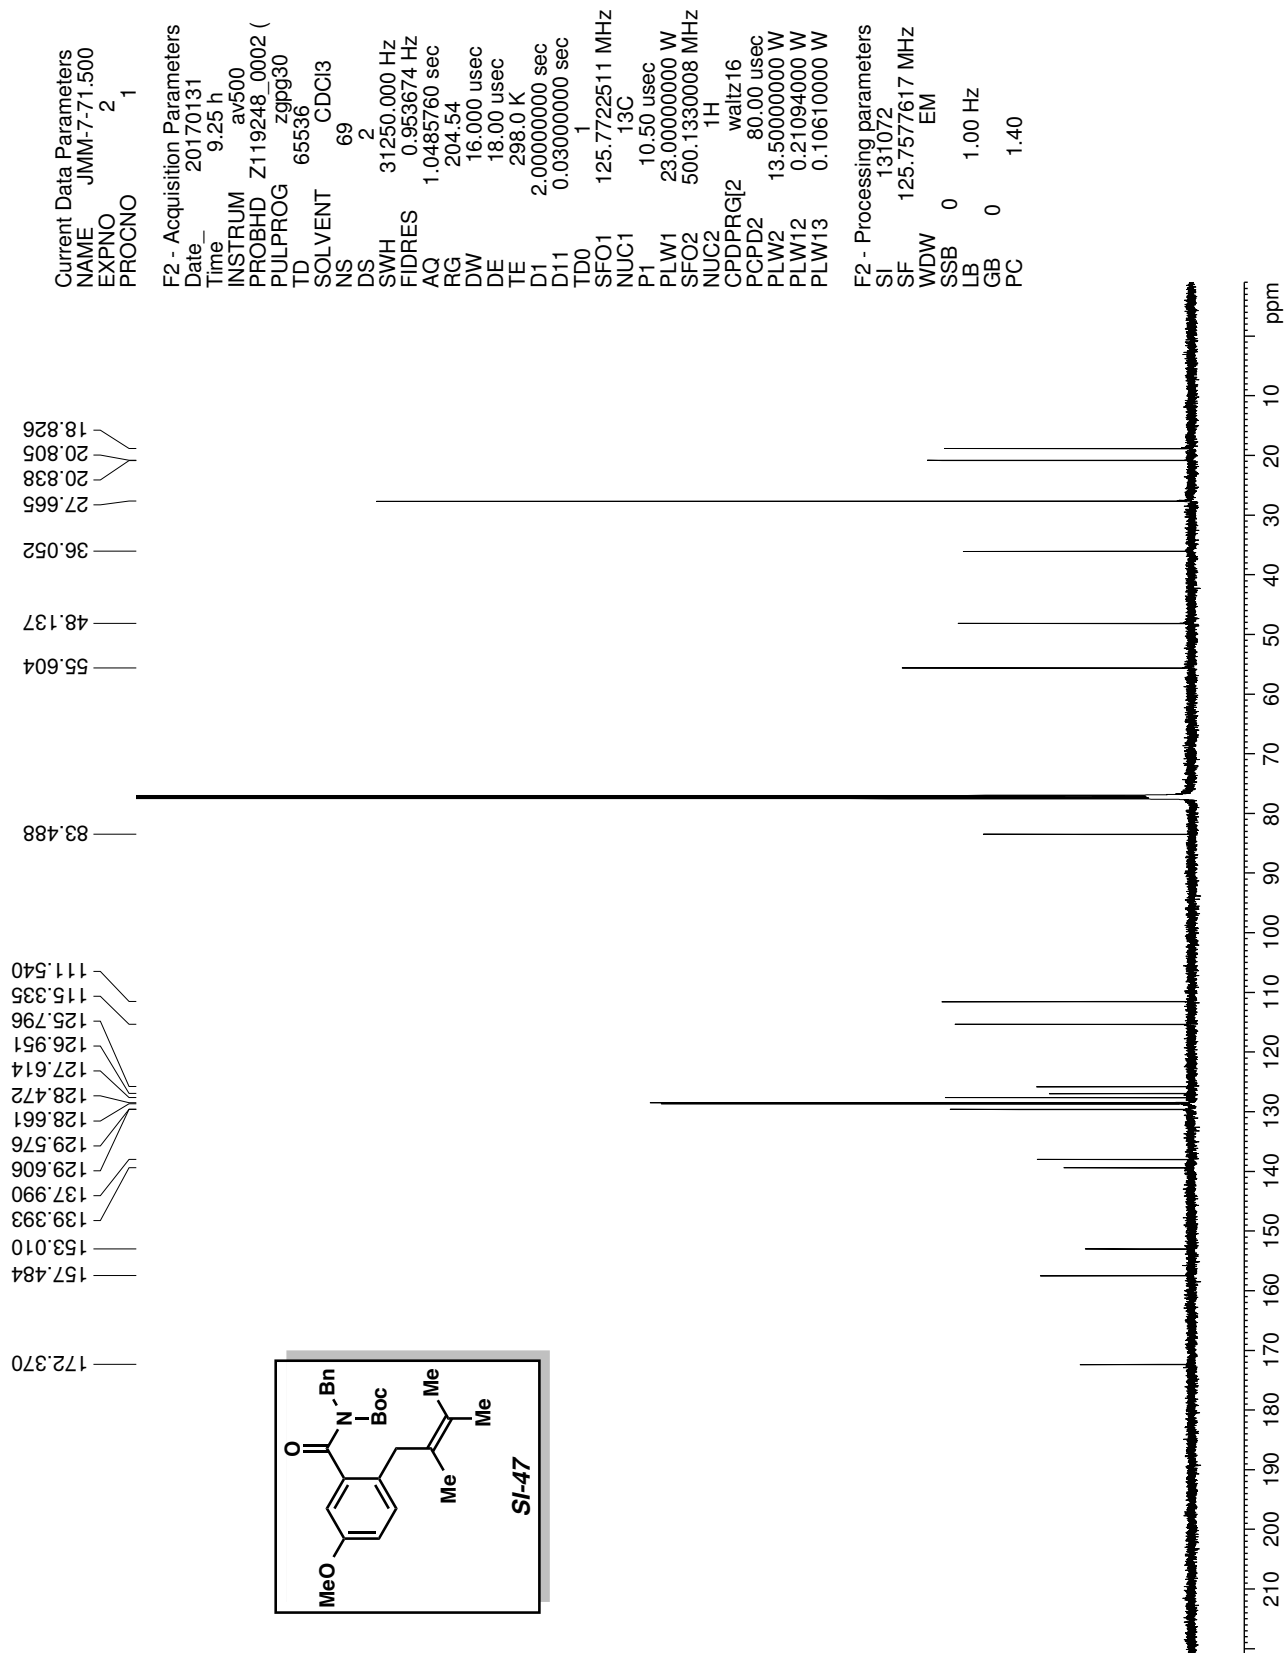

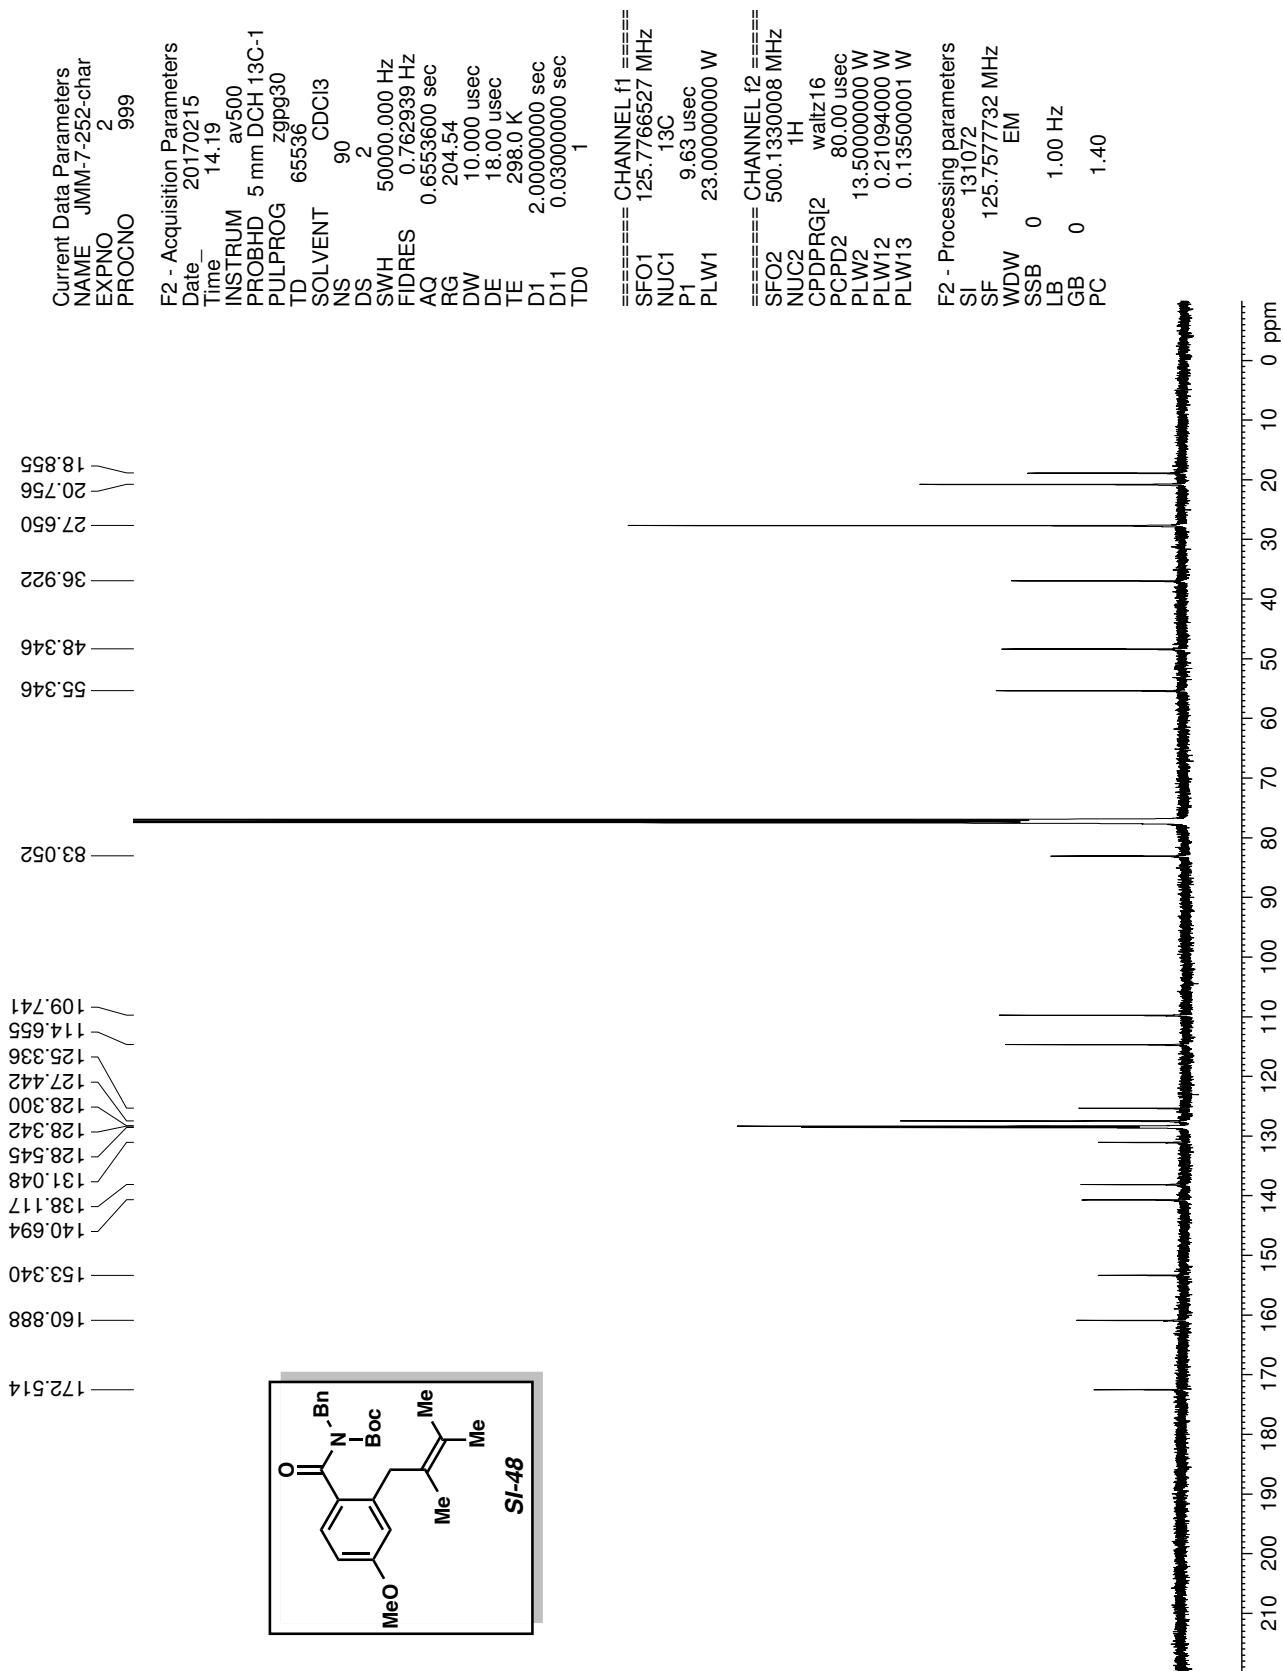

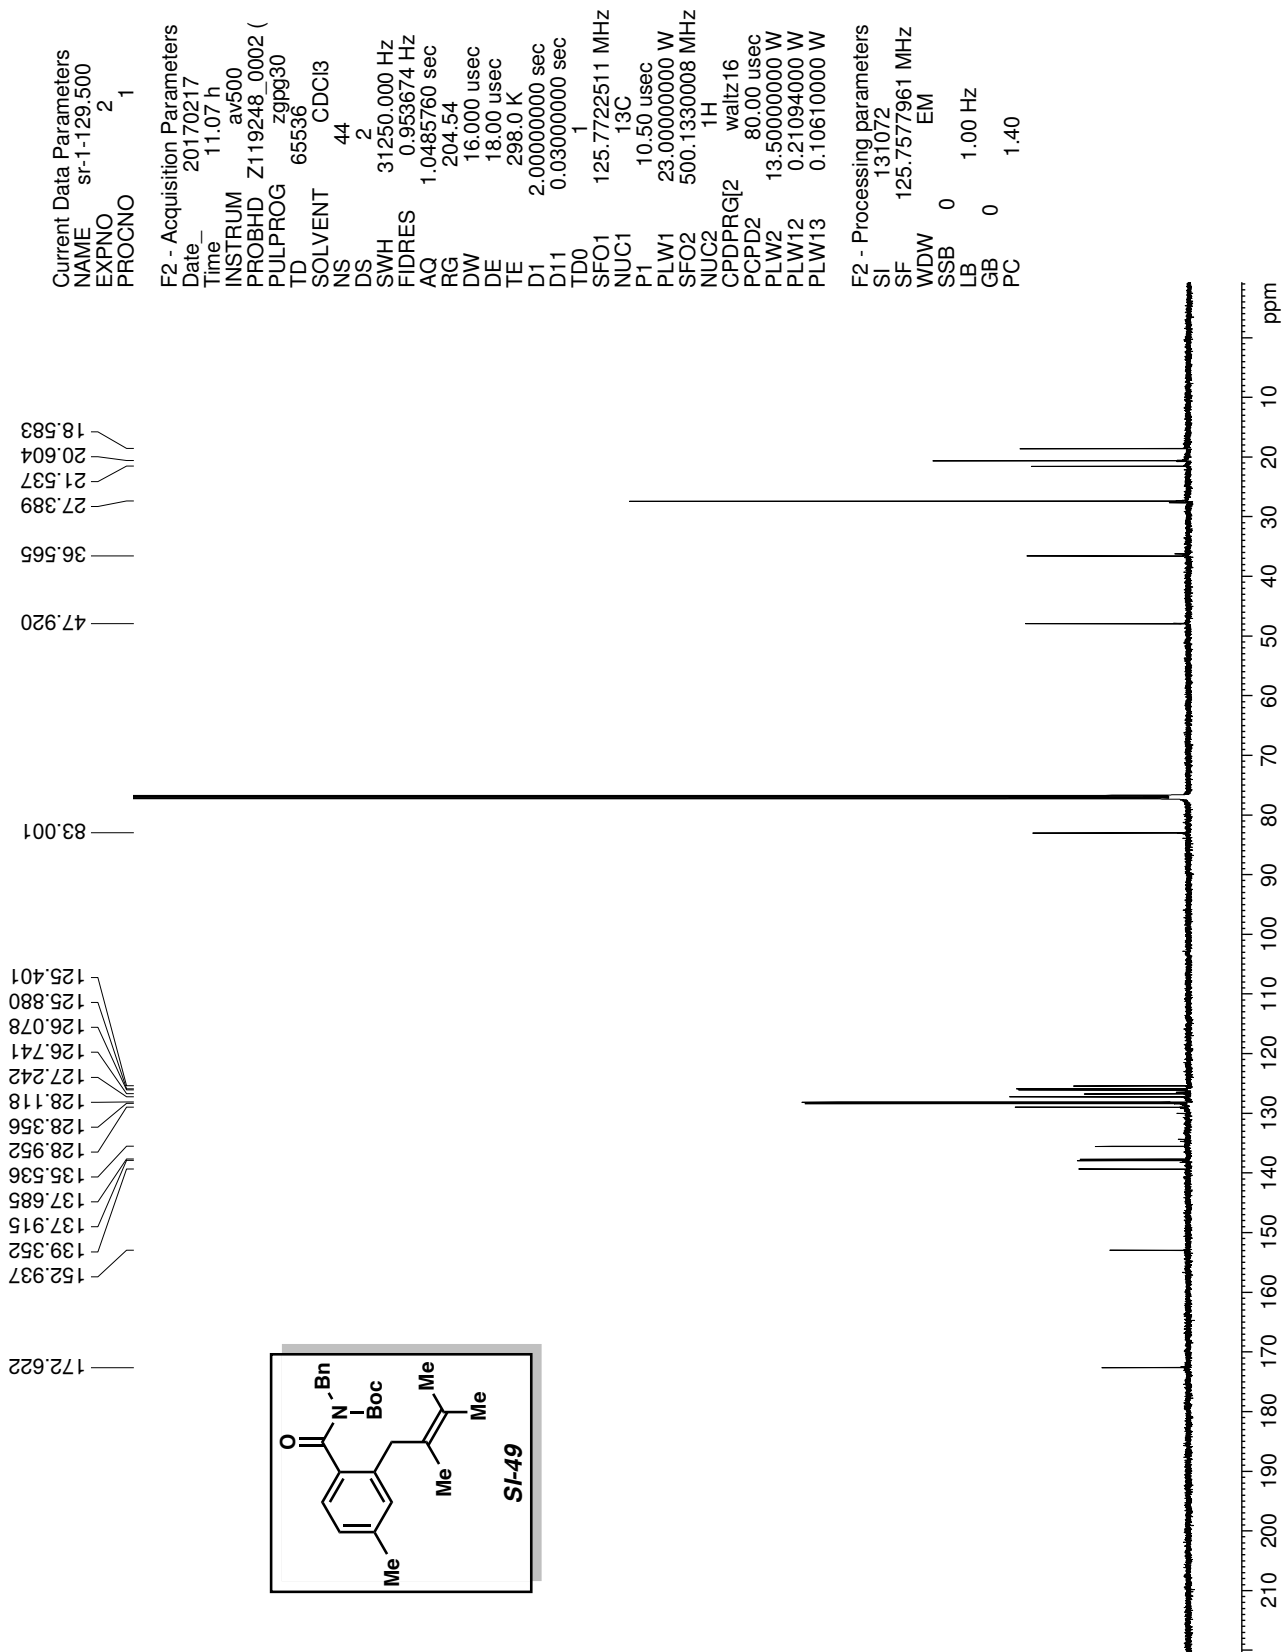

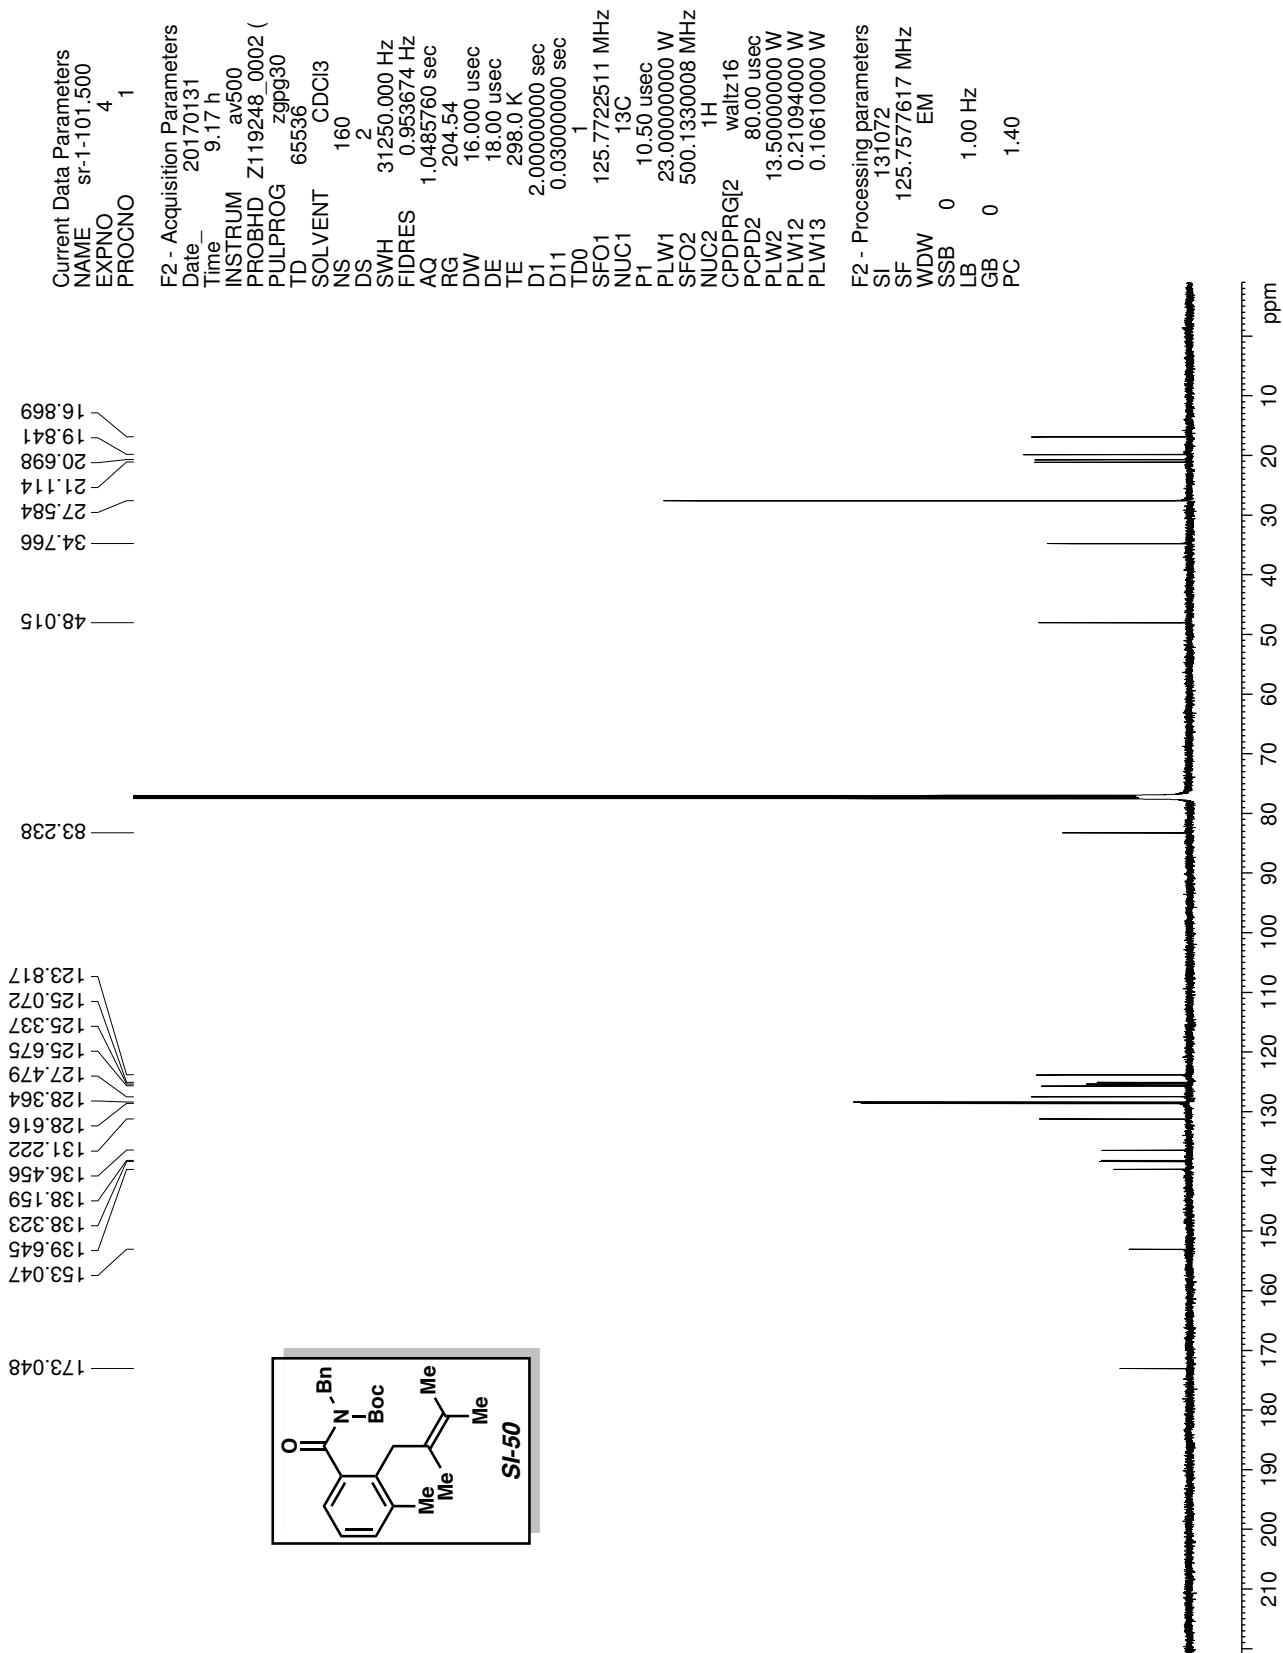

Current Data Parameters  
 NAME JM-5-025  
 EXPNO 3  
 PROCNO 1

F2 - Acquisition Parameters  
 Date\_ 20170115  
 Time 13.55 h  
 INSTRUM av500  
 PROBHD Z119248\_0002 (PULPROG zgpg30)  
 TD 65536  
 SOLVENT CDCl3  
 NS 96  
 DS 2  
 SWH 31250.000 Hz  
 FIDRES 0.953674 Hz  
 AQ 1.0485760 sec  
 RG 204.54  
 DW 16.000 usec  
 DE 18.00 usec  
 TE 298.0 K  
 D1 2.00000000 sec  
 D11 0.03000000 sec  
 TD0 1  
 SFO1 125.7722511 MHz  
 NUC1 13C  
 P1 10.50 usec  
 PLW1 23.00000000 W  
 SFO2 500.1330008 MHz  
 NUC2 1H  
 CPDPRG2 waltz16  
 PCPD2 80.00 usec  
 PLW2 13.50000000 W  
 PLW12 0.21094000 W  
 PLW13 0.10610000 W

F2 - Processing parameters  
 SI 131072  
 SF 125.7577892 MHz  
 WDW EM  
 SSB 0  
 LB 1.00 Hz  
 GB 0  
 PC 1.40

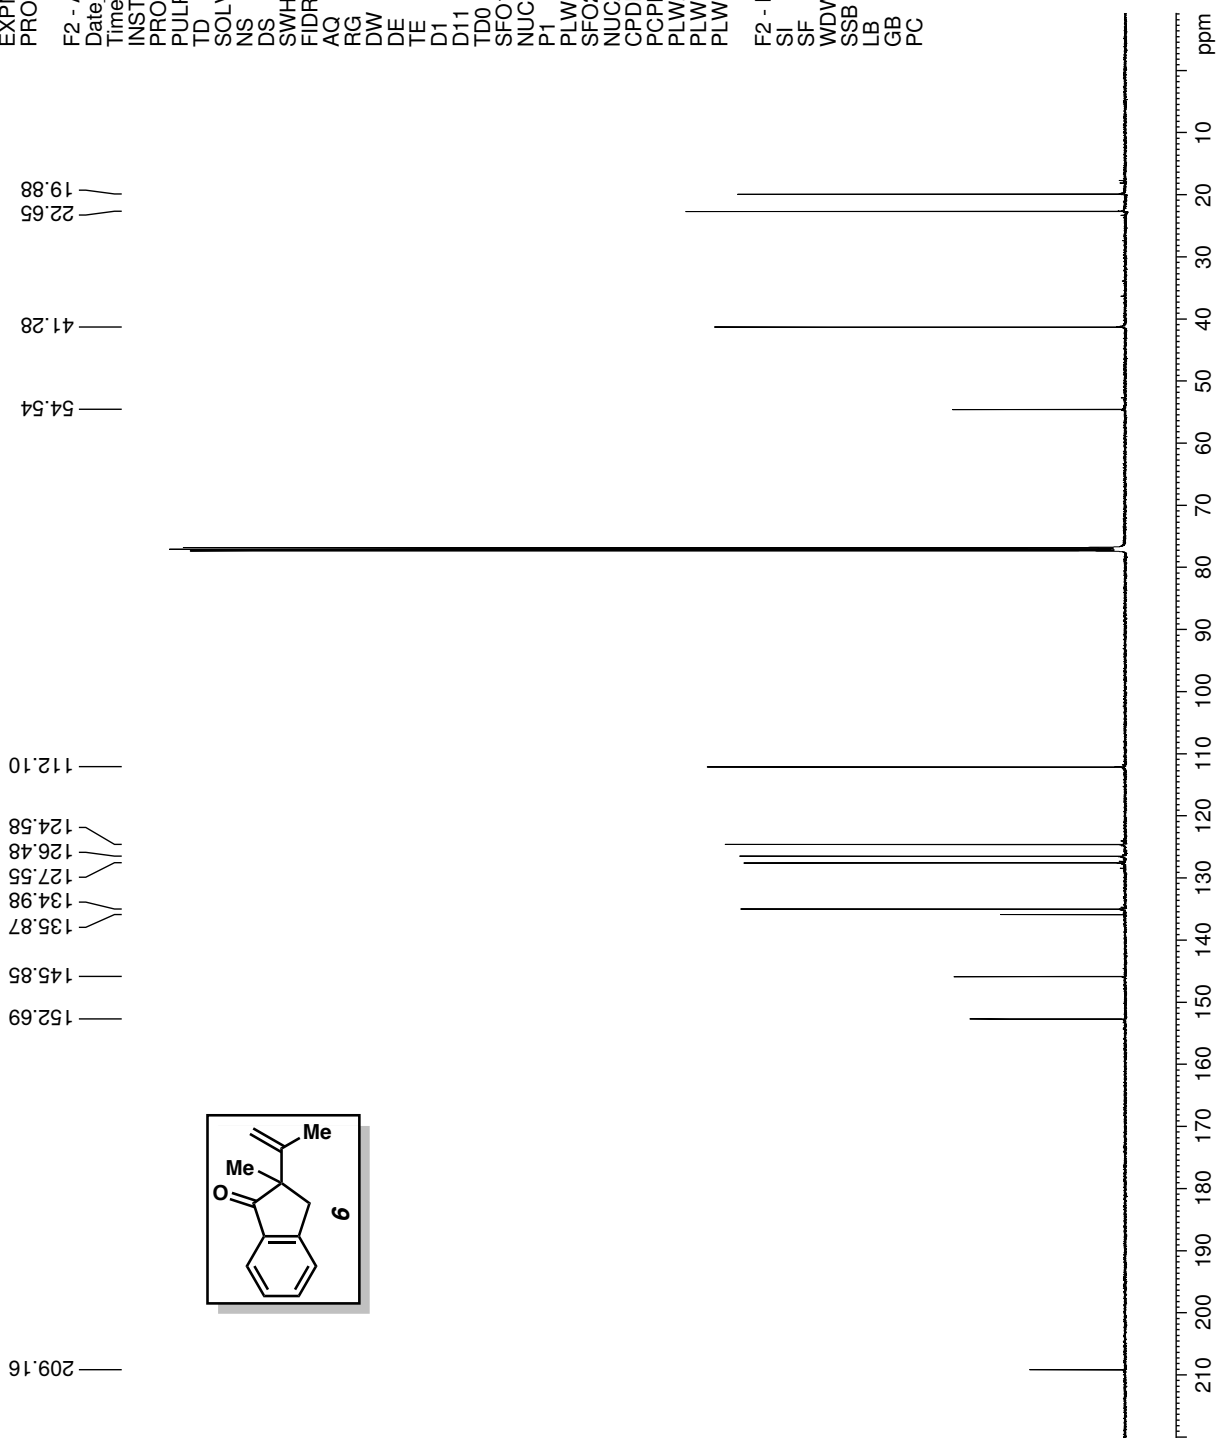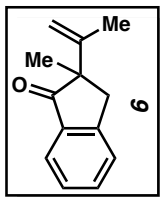

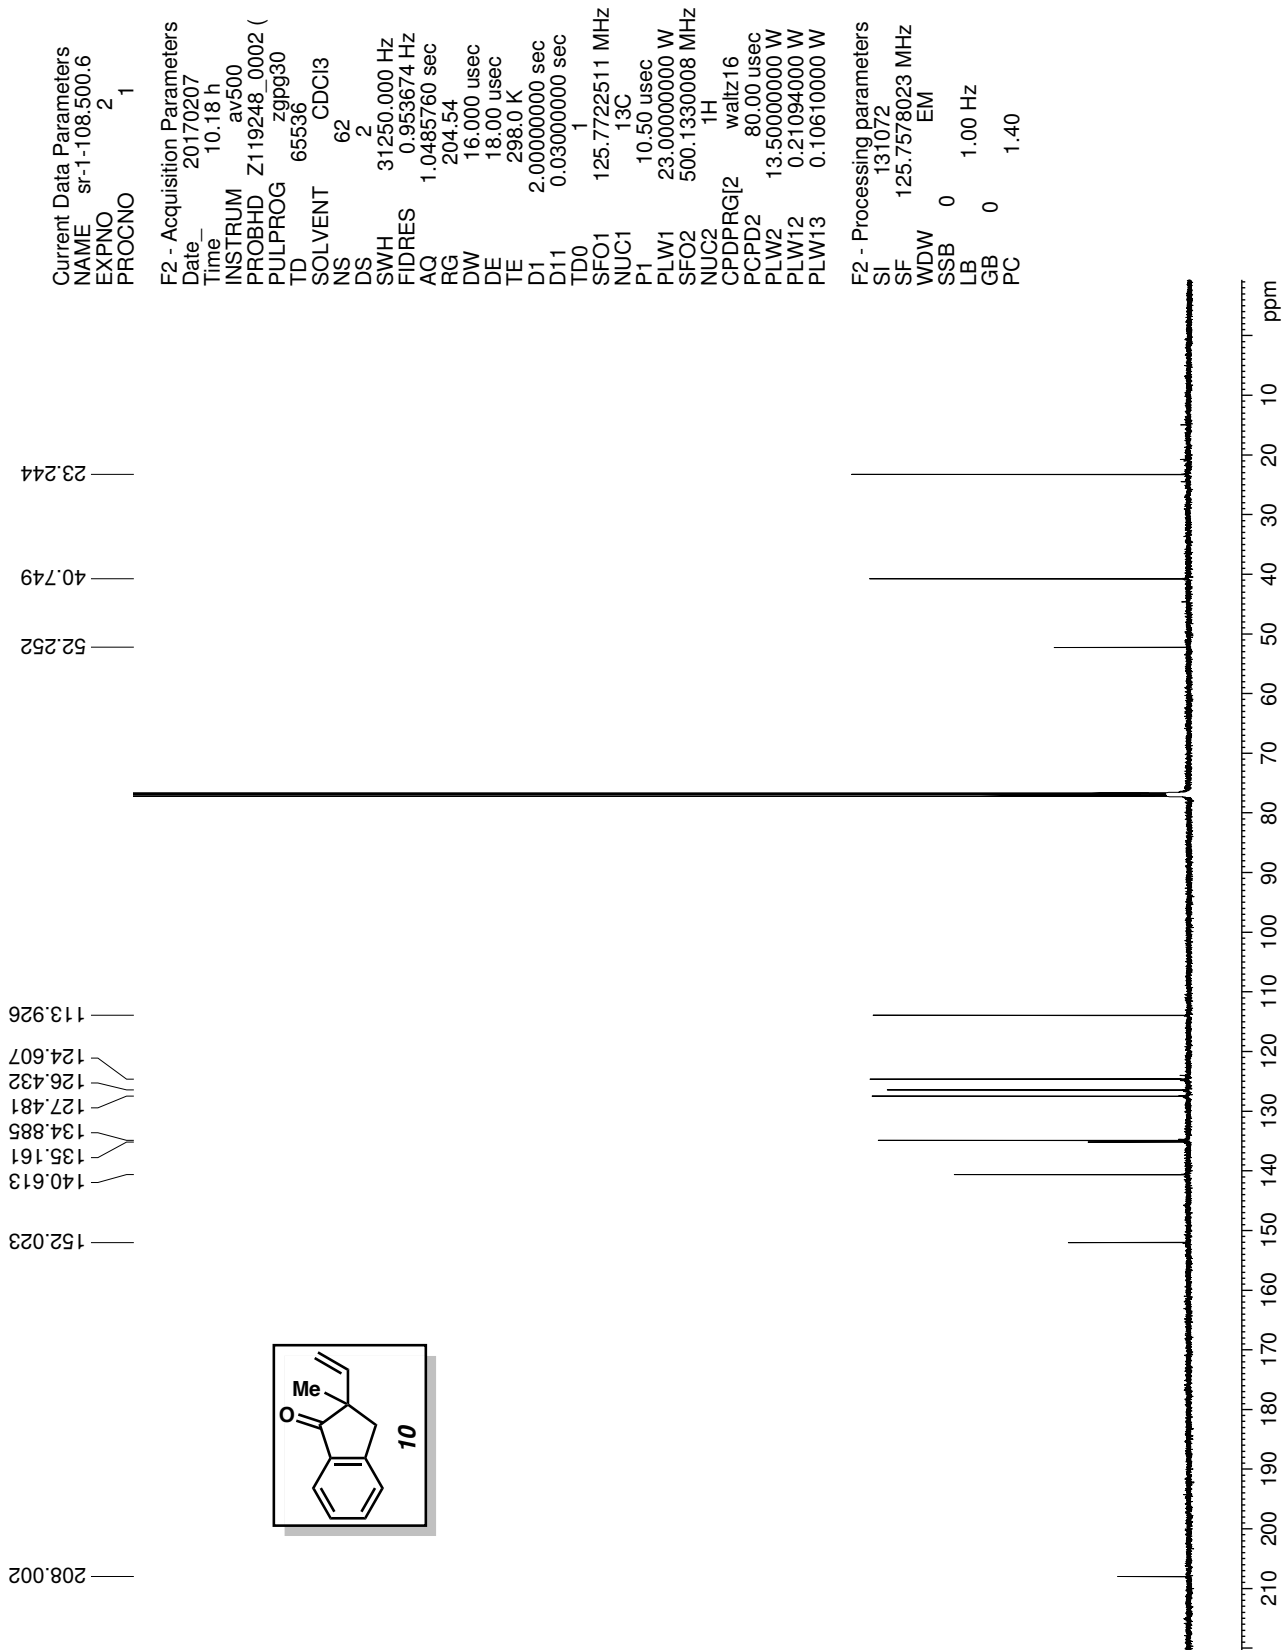



Current Data Parameters  
 NAME JM-5-019  
 EXPNO 401  
 PROCNO 1

F2 - Acquisition Parameters  
 Date\_ 20170110  
 Time 9.50 h  
 INSTRUM av500  
 PROBHD Z119248\_0002 (  
 PULPROG zgpg30  
 TD 65536  
 SOLVENT CDC13  
 NS 399  
 DS 2  
 SWH 31250.000 Hz  
 FIDRES 0.953674 Hz  
 AQ 1.0485760 sec  
 RG 204.54  
 DW 16.000 usec  
 DE 18.00 usec  
 TE 298.0 K  
 D1 2.00000000 sec  
 D11 0.03000000 sec  
 TD0 1  
 SFO1 125.7722511 MHz  
 NUC1 13C  
 P1 10.50 usec  
 PLW1 23.00000000 W  
 SFO2 500.1330008 MHz  
 NUC2 1H  
 CPDPRG2 waltz16  
 PCPD2 80.00 usec  
 PLW2 13.50000000 W  
 PLW12 0.21094000 W  
 PLW13 0.10610000 W

F2 - Processing parameters  
 SI 131072  
 SF 125.7577718 MHz  
 WDW EM  
 SSB 0  
 LB 1.00 Hz  
 GB 0  
 PC 1.40

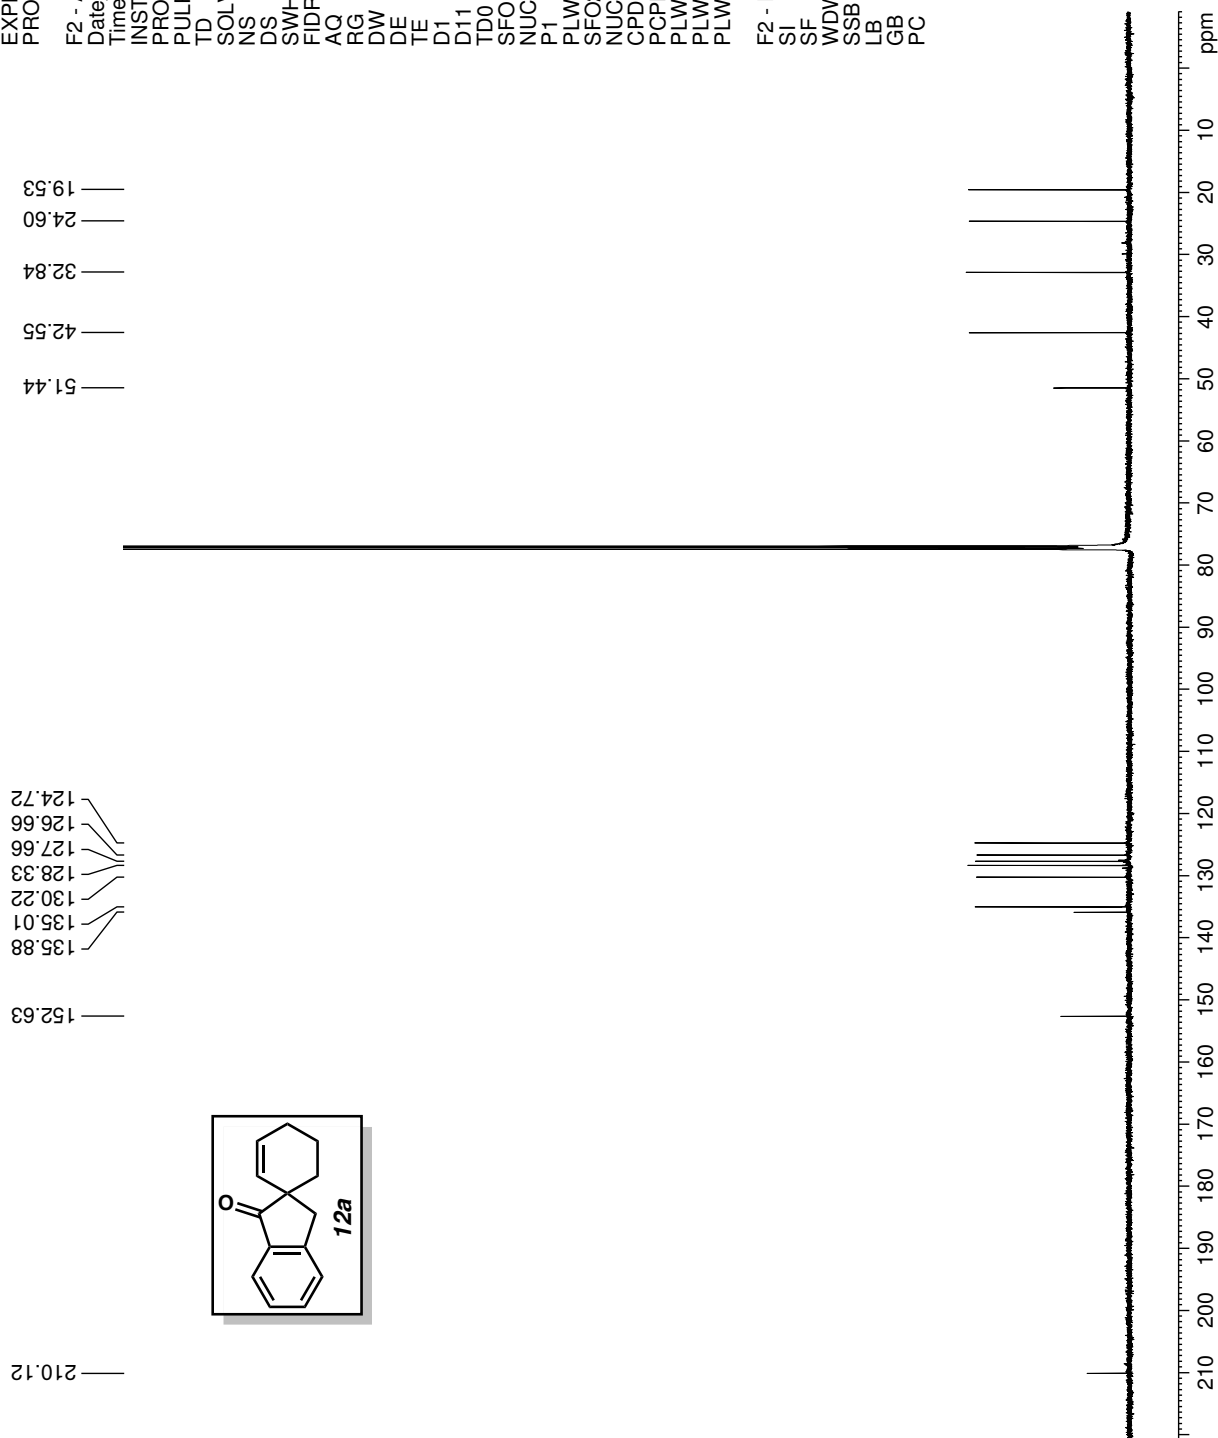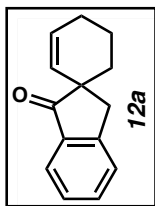

Current Data Parameters  
 NAME JM-5-019  
 EXPNO 301  
 PROCNO 1

F2 - Acquisition Parameters  
 Date\_ 20170110  
 Time 10.03 h  
 INSTRUM av500  
 PROBHD Z119248\_0002 (  
 PULPROG zgpg30  
 TD 65536  
 SOLVENT CDCI3  
 NS 162  
 DS 2  
 SWH 31250.000 Hz  
 FIDRES 0.953674 Hz  
 AQ 1.0485760 sec  
 RG 204.54  
 DW 16.000 usec  
 DE 18.00 usec  
 TE 298.0 K  
 D1 2.00000000 sec  
 D11 0.03000000 sec  
 TD0 1  
 SFO1 125.7722511 MHz  
 NUC1 13C  
 P1 10.50 usec  
 PLW1 23.00000000 W  
 SFO2 500.1330008 MHz  
 NUC2 1H  
 CPDPRG2 waltz16  
 PCPD2 80.00 usec  
 PLW2 13.50000000 W  
 PLW12 0.21094000 W  
 PLW13 0.10610000 W

F2 - Processing parameters  
 SI 131072  
 SF 125.7577722 MHz  
 WDW EM  
 SSB 0  
 LB 0  
 GB 0  
 PC 1.40

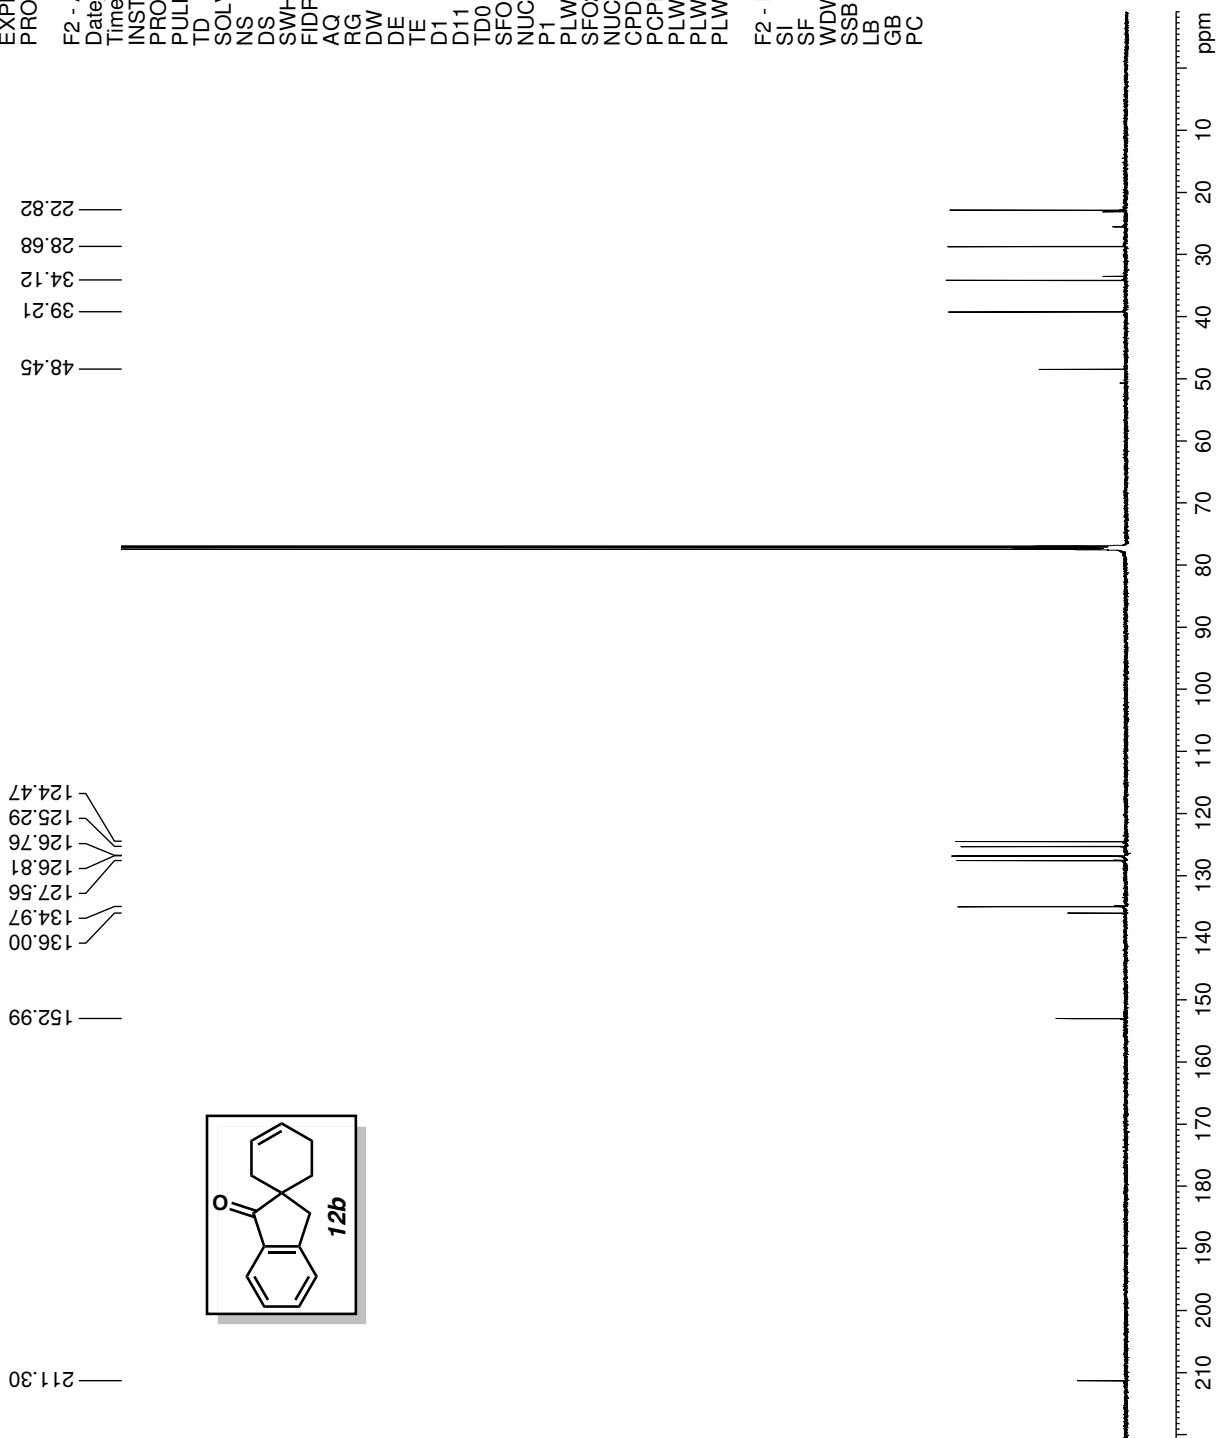

Current Data Parameters  
 NAME JMM-7-212(A1)  
 EXPNO 2  
 PROCNO 999

F2 - Acquisition Parameters  
 Date\_ 20161216  
 Time\_ 9.10  
 INSTRUM av500  
 PROBHD 5 mm DCH 13C-1  
 PULPROG zgpg30  
 TD 65536  
 SOLVENT CDCl3  
 NS 40  
 DS 2  
 SWH 50000.000 Hz  
 FIDRES 0.762939 Hz  
 AQ 0.6553600 sec  
 RG 204.54  
 DW 10.000 usec  
 DE 18.00 usec  
 TE 298.0 K  
 D1 2.00000000 sec  
 D11 0.03000000 sec  
 TD0 1

==== CHANNEL f1 =====  
 SFO1 125.7728799 MHz  
 NUC1 13C  
 P1 9.63 usec  
 PLW1 23.00000000 W

==== CHANNEL f2 =====  
 SFO2 500.1330008 MHz  
 NUC2 1H  
 CPDPRG2 waltz16  
 PCPD2 80.00 usec  
 PLW2 13.50000000 W  
 PLW12 0.21094000 W  
 PLW13 0.13500001 W

F2 - Processing parameters  
 SI 131072  
 SF 125.7577731 MHz  
 WDW EM  
 SSB 0  
 LB 0 1.00 Hz  
 GB 0  
 PC 1.40

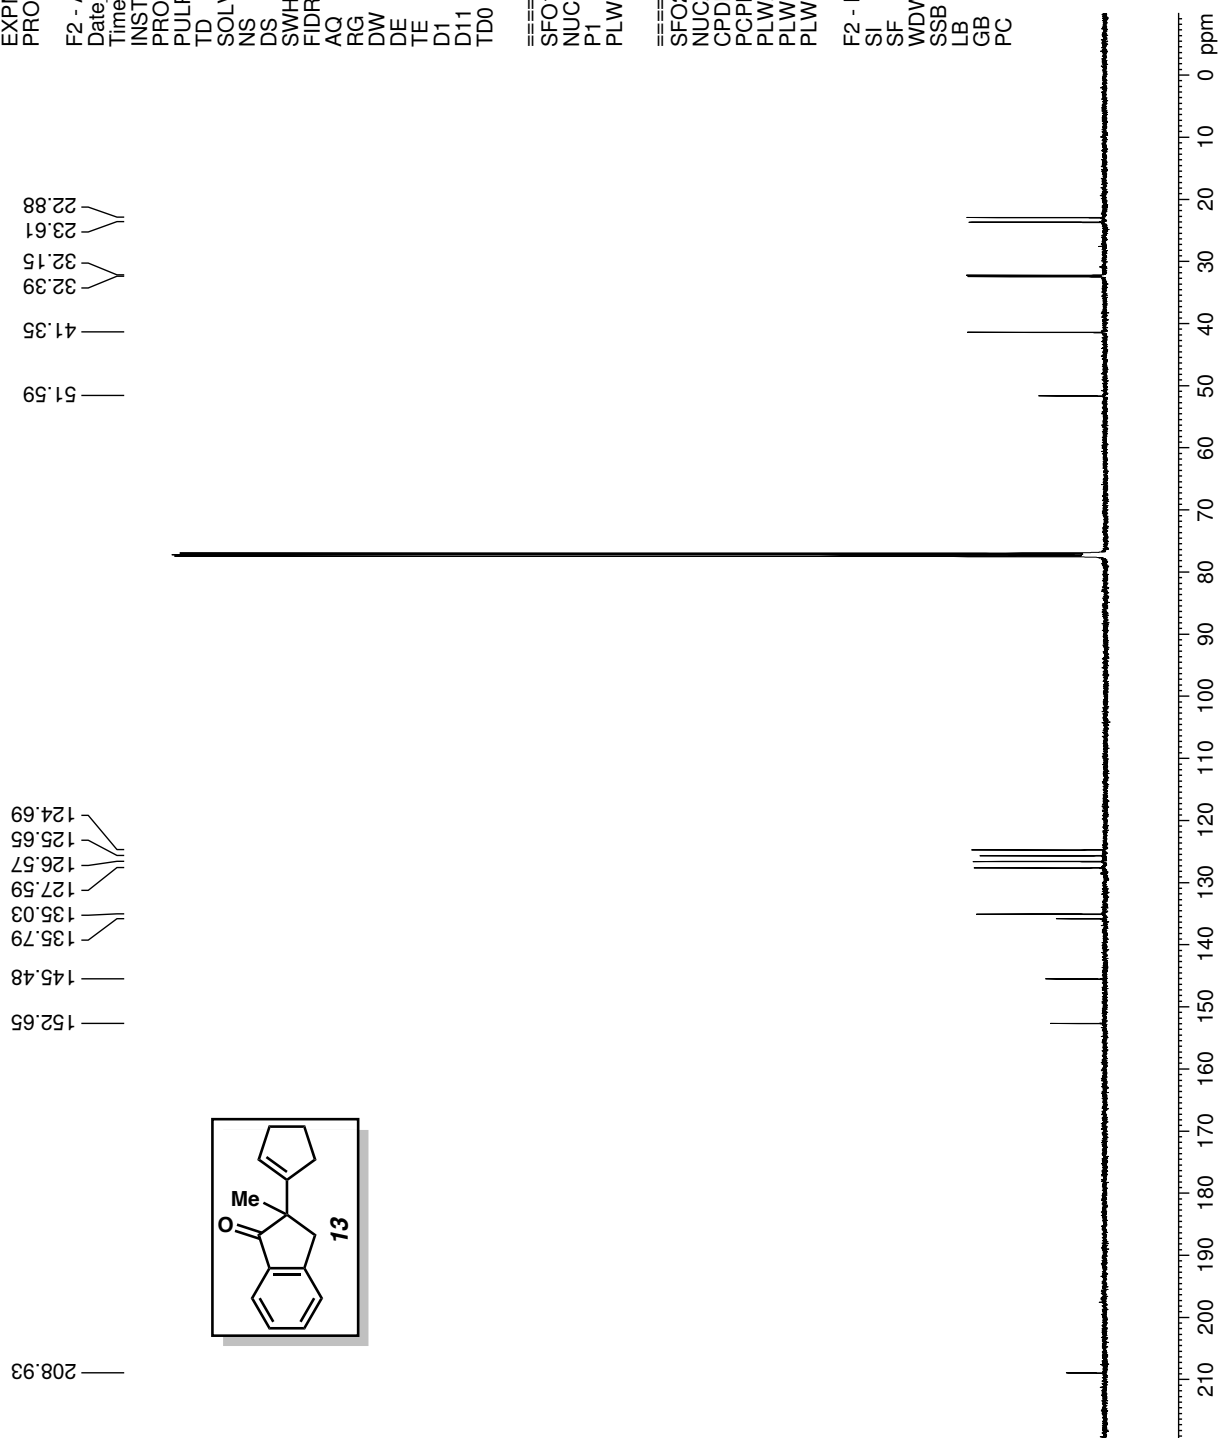

Current Data Parameters  
 NAME JMM-7-198(Cchar)  
 EXPNO 2  
 PROCNO 1

F2 - Acquisition Parameters  
 Date\_ 20161204  
 Time 14.22  
 INSTRUM av500  
 PROBHD 5 mm DCH 13C-1  
 PULPROG zgpg30  
 TD 65536  
 SOLVENT CDCl3  
 NS 136  
 DS 2  
 SWH 50000.000 Hz  
 FIDRES 0.762939 Hz  
 AQ 0.6553600 sec  
 RG 204.54  
 DW 10.000 usec  
 DE 100.00 usec  
 TE 298.0 K  
 D1 2.00000000 sec  
 D11 0.03000000 sec  
 TD0 1

=====  
 CHANNEL f1  
 SFO1 125.7634481 MHz  
 NUC1 13C  
 P1 9.63 usec  
 PLW1 23.00000000 W

=====  
 CHANNEL f2  
 SFO2 500.1330008 MHz  
 NUC2 1H  
 CPDPRG2 waltz16  
 PCPD2 80.00 usec  
 PLW2 13.50000000 W  
 PLW12 0.21094000 W  
 PLW13 0.13500001 W

F2 - Processing parameters  
 SI 131072  
 SF 125.7577744 MHz  
 WDW EM  
 SSB 0  
 LB 0  
 GB 0  
 PC 1.40

22.28  
 22.32  
 23.12  
 25.52

41.68

54.55

122.37  
 124.54  
 126.55  
 127.51  
 134.94  
 136.32  
 138.45

153.09

210.24

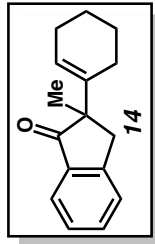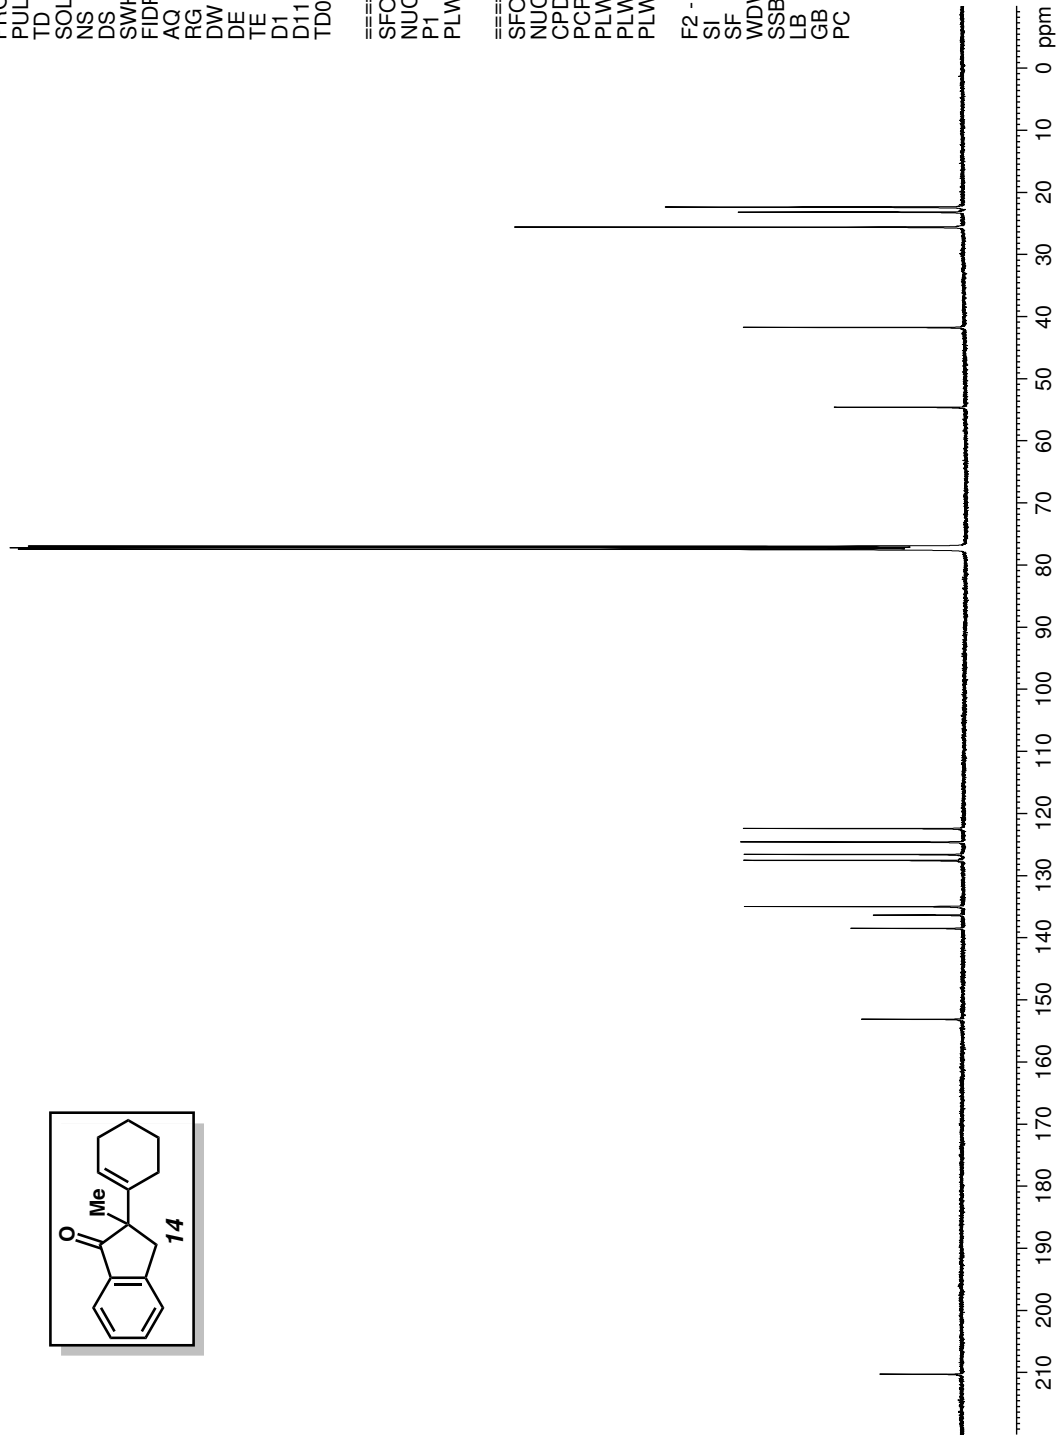

Current Data Parameters  
 NAME JMM-7-225-char  
 EXPNO 2  
 PROCNO 999

F2 - Acquisition Parameters  
 Date\_ 20170126  
 Time 13.18  
 INSTRUM av500  
 PROBHD 5 mm DCH 13C-1  
 PULPROG zgpg30  
 TD 65536  
 SOLVENT CDCl3  
 NS 89  
 DS 2  
 SWH 50000.000 Hz  
 FIDRES 0.762939 Hz  
 AQ 0.6553600 sec  
 RG 204.54  
 DW 10.000 usec  
 DE 18.00 usec  
 TE 298.0 K  
 D1 2.00000000 sec  
 D11 0.03000000 sec  
 TD0 1

=====  
 CHANNEL f1 =====  
 SFO1 125.7766527 MHz  
 NUC1 13C  
 P1 9.63 usec  
 PLW1 23.00000000 W

=====  
 CHANNEL f2 =====  
 SFO2 500.1330008 MHz  
 NUC2 1H  
 CPDPRG2 waltz16  
 PCPD2 80.00 usec  
 PLW2 13.50000000 W  
 PLW12 0.21094000 W  
 PLW13 0.13500001 W

F2 - Processing parameters  
 SI 131072  
 SF 125.7577735 MHz  
 WDW EM  
 SSB 0  
 LB 0  
 GB 0  
 PC 1.40

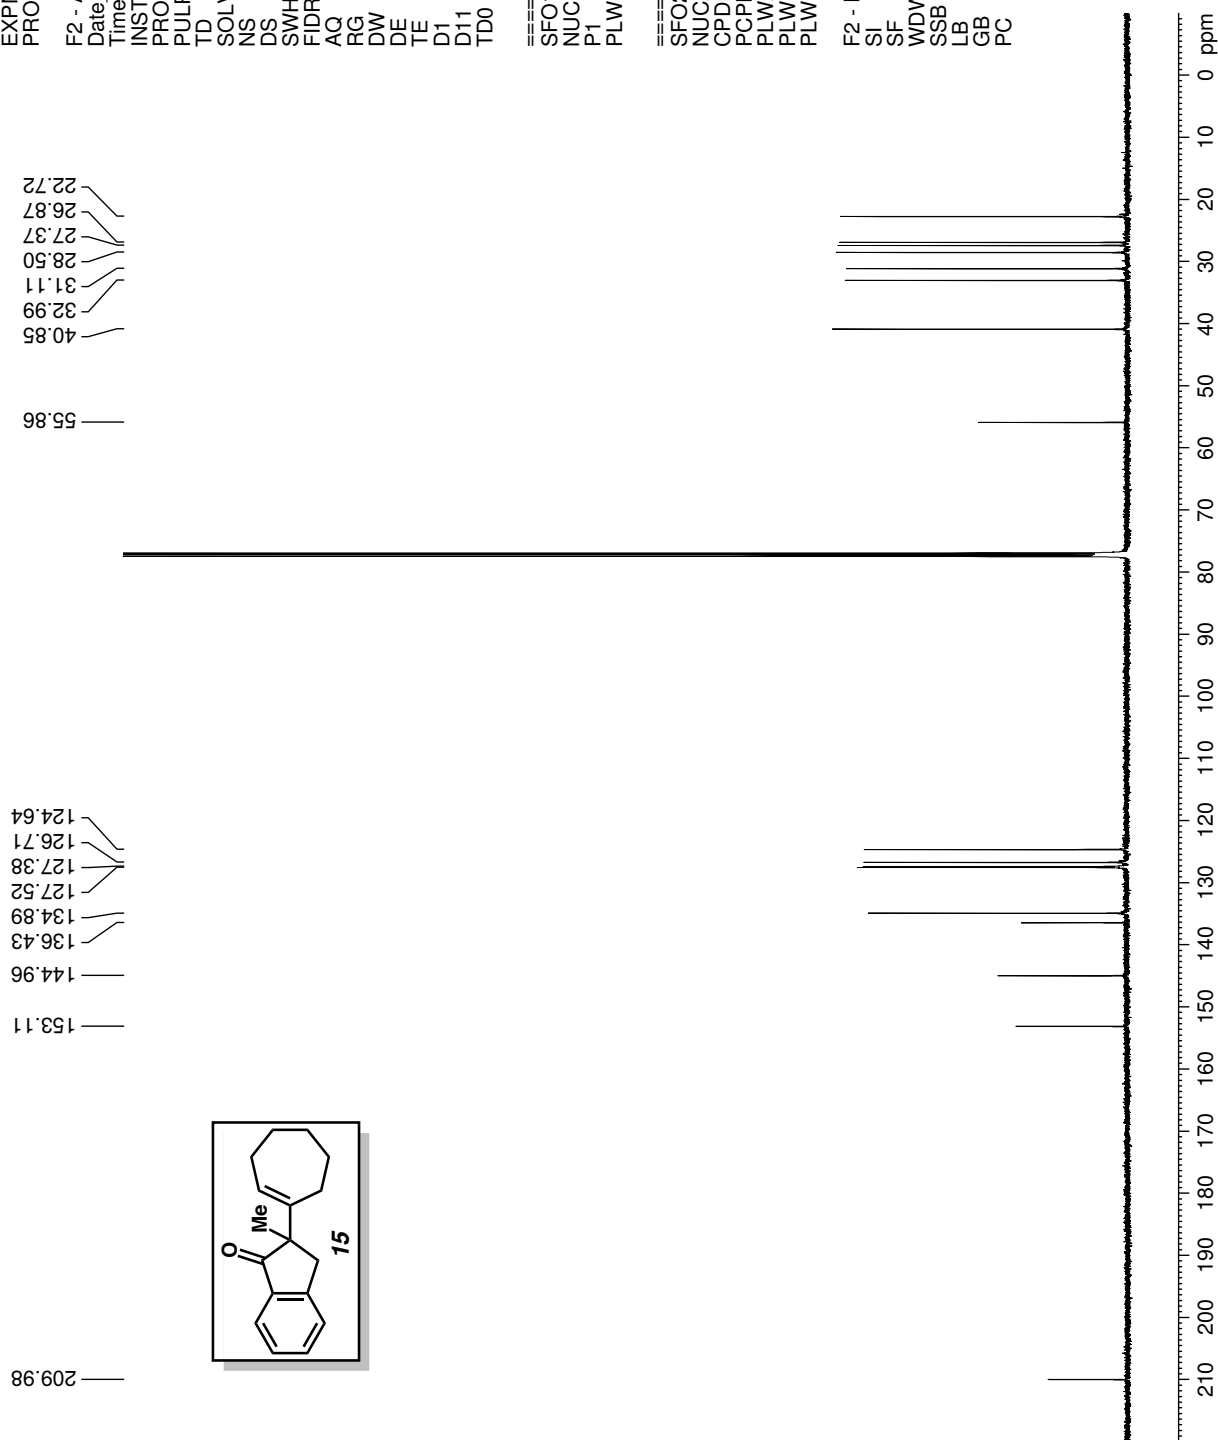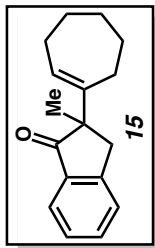

Current Data Parameters  
 NAME JM-5-017  
 EXPNO 101  
 PROCNO 1

F2 - Acquisition Parameters  
 Date\_ 20161216  
 Time\_ 11.32 h  
 INSTRUM av500  
 PROBHD Z119248\_0002 (  
 PULPROG zgpg30  
 TD 65536  
 SOLVENT CDCl3  
 NS 960  
 DS 2  
 SWH 31250.000 Hz  
 FIDRES 0.953674 Hz  
 AQ 1.0485760 sec  
 RG 204.54  
 DW 16.000 usec  
 DE 18.00 usec  
 TE 298.0 K  
 D1 2.00000000 sec  
 D11 0.03000000 sec  
 TD0 1  
 SFO1 125.7722511 MHz  
 NUC1 13C  
 P1 10.50 usec  
 PLW1 23.00000000 W  
 SFO2 500.1330008 MHz  
 NUC2 1H  
 CPDPRG2 waltz16  
 PCPD2 80.00 usec  
 PLW2 13.50000000 W  
 PLW12 0.21094000 W  
 PLW13 0.10610000 W

F2 - Processing parameters  
 SI 131072  
 SF 125.7577719 MHz  
 WDW EM  
 SSB 0  
 LB 1.00 Hz  
 GB 0  
 PC 1.40

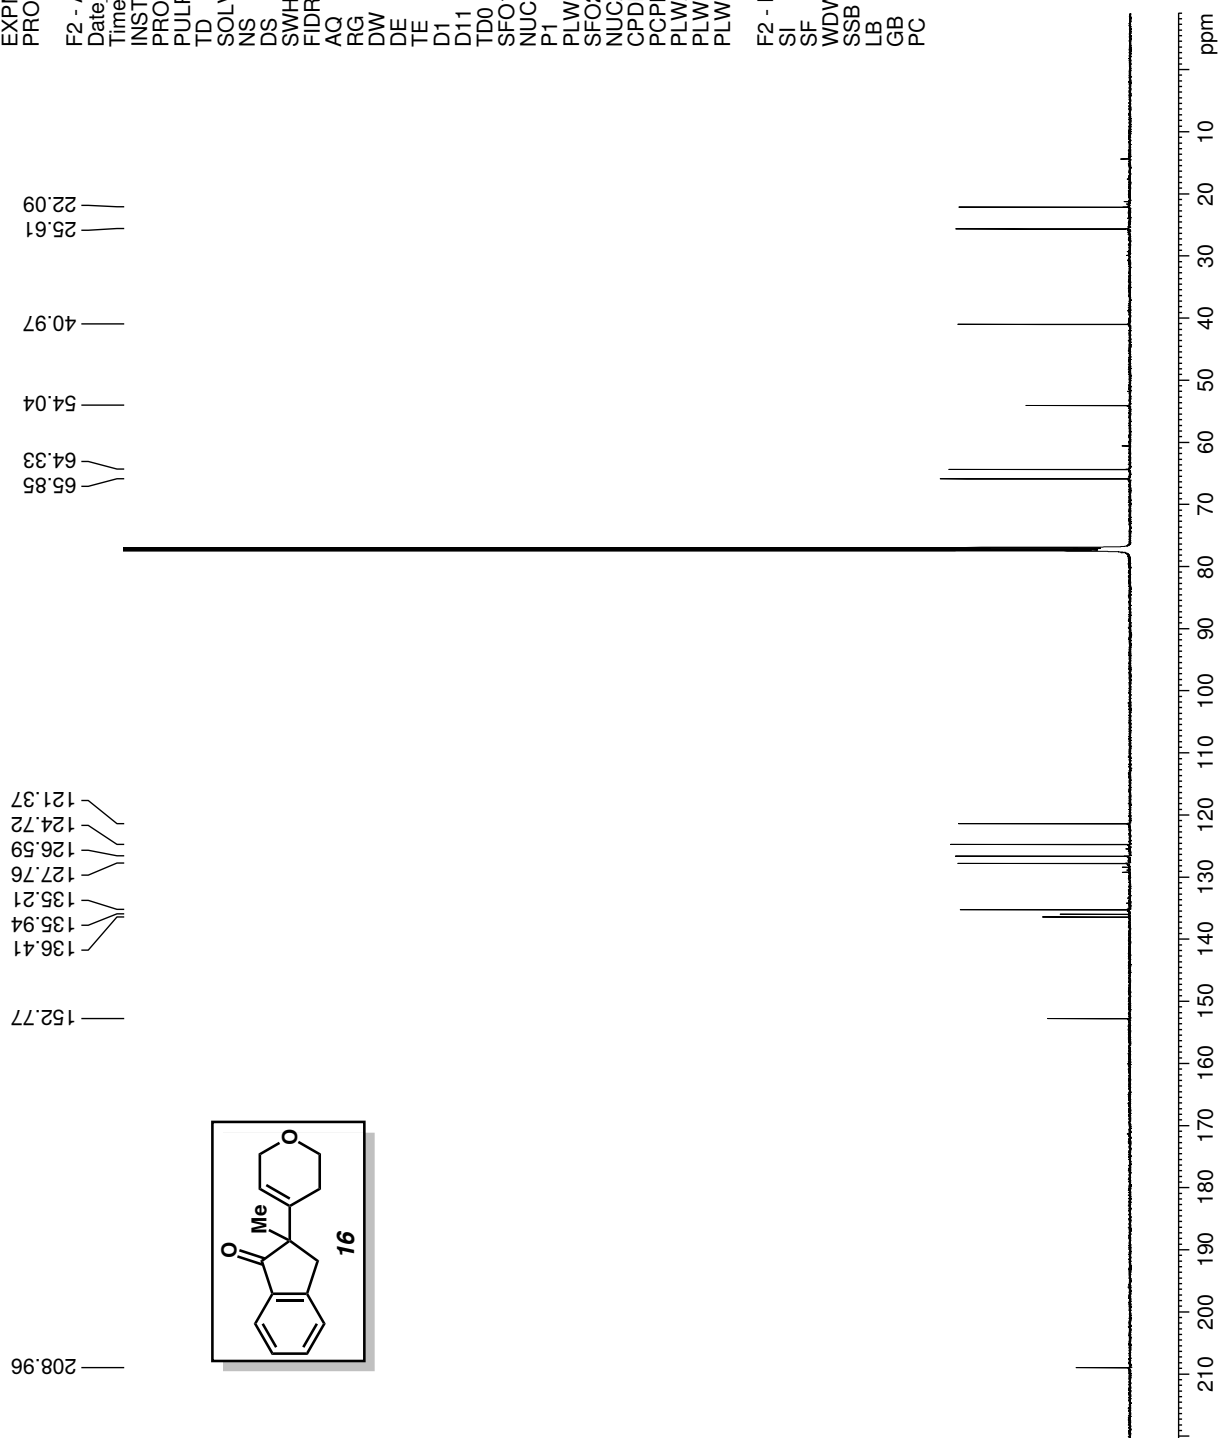

Current Data Parameters  
 NAME JM-5-021-2D  
 EXPNO 2  
 PROCNO 1

F2 - Acquisition Parameters  
 Date\_ 20170106  
 Time\_ 14.26 h  
 INSTRUM av500  
 PROBHD Z119248\_0002 (  
 PULPROG zgpg30  
 TD 65536  
 SOLVENT CDCl3  
 NS 129  
 DS 2  
 SWH 31250.000 Hz  
 FIDRES 0.953674 Hz  
 AQ 1.0485760 sec  
 RG 204.54  
 DW 16.000 usec  
 DE 18.00 usec  
 TE 298.0 K  
 D1 2.00000000 sec  
 D11 0.03000000 sec  
 TD0 1  
 SFO1 125.7722511 MHz  
 NUC1 13C  
 P1 10.50 usec  
 PLW1 23.00000000 W  
 SFO2 500.1330008 MHz  
 NUC2 1H  
 CPDPRG2 waltz16  
 PCPD2 80.00 usec  
 PLW2 13.50000000 W  
 PLW12 0.21094000 W  
 PLW13 0.10610000 W

F2 - Processing parameters  
 SI 131072  
 SF 125.757758 MHz  
 WDW EM  
 SSB 0  
 LB 0  
 GB 0  
 PC 1.40

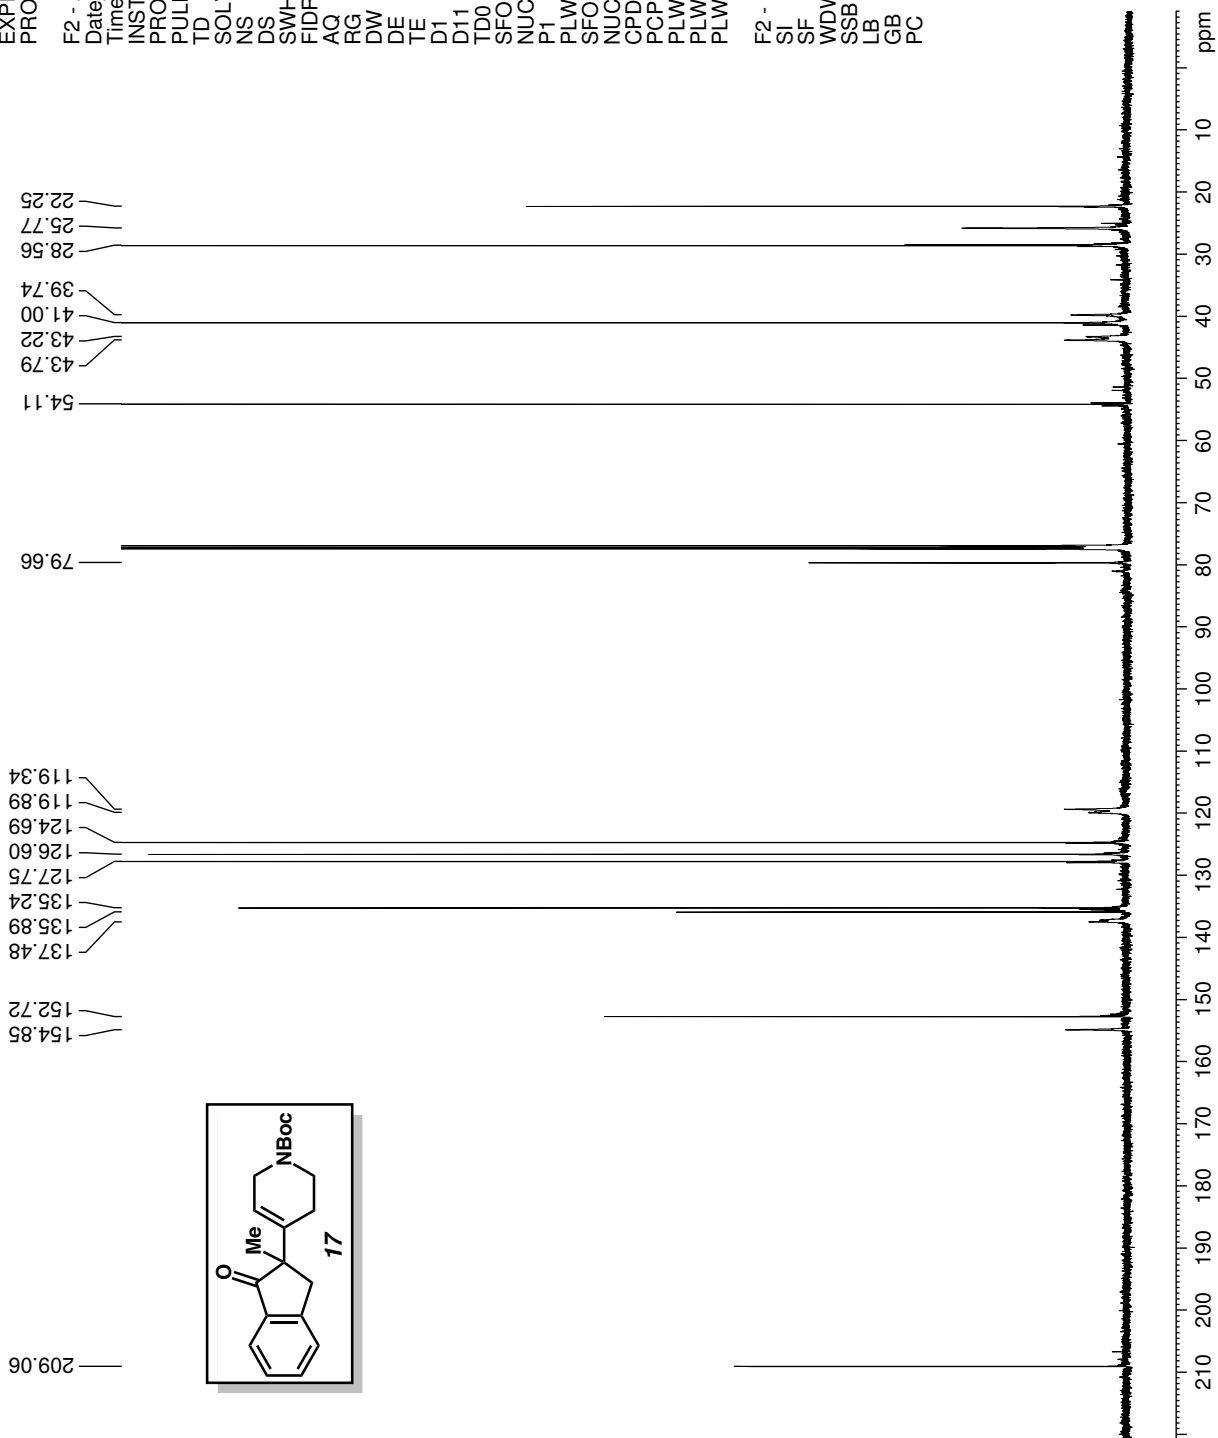

Current Data Parameters  
 NAME JM-5-067  
 EXPNO 201  
 PROCNO 1

F2 - Acquisition Parameters  
 Date\_ 20170217  
 Time 18.20 h  
 INSTRUM av500  
 PROBHD Z119248\_0002 (  
 PULPROG zgpg30  
 TD 65536  
 SOLVENT CDCl3  
 NS 48  
 DS 2  
 SWH 31250.000 Hz  
 FIDRES 0.953674 Hz  
 AQ 1.0485760 sec  
 RG 204.54  
 DW 16.000 usec  
 DE 18.00 usec  
 TE 298.0 K  
 D1 2.00000000 sec  
 D11 0.03000000 sec  
 TD0 1  
 SFO1 125.7722511 MHz  
 NUC1 13C  
 P1 10.50 usec  
 PLW1 23.00000000 W  
 SFO2 500.1330008 MHz  
 NUC2 1H  
 CPDPRG2 waltz16  
 PCPD2 80.00 usec  
 PLW2 13.50000000 W  
 PLW12 0.21094000 W  
 PLW13 0.10610000 W

F2 - Processing parameters  
 SI 131072  
 SF 125.7577729 MHz  
 WDW EM  
 SSB 0  
 LB 1.00 Hz  
 GB 0  
 PC 1.40

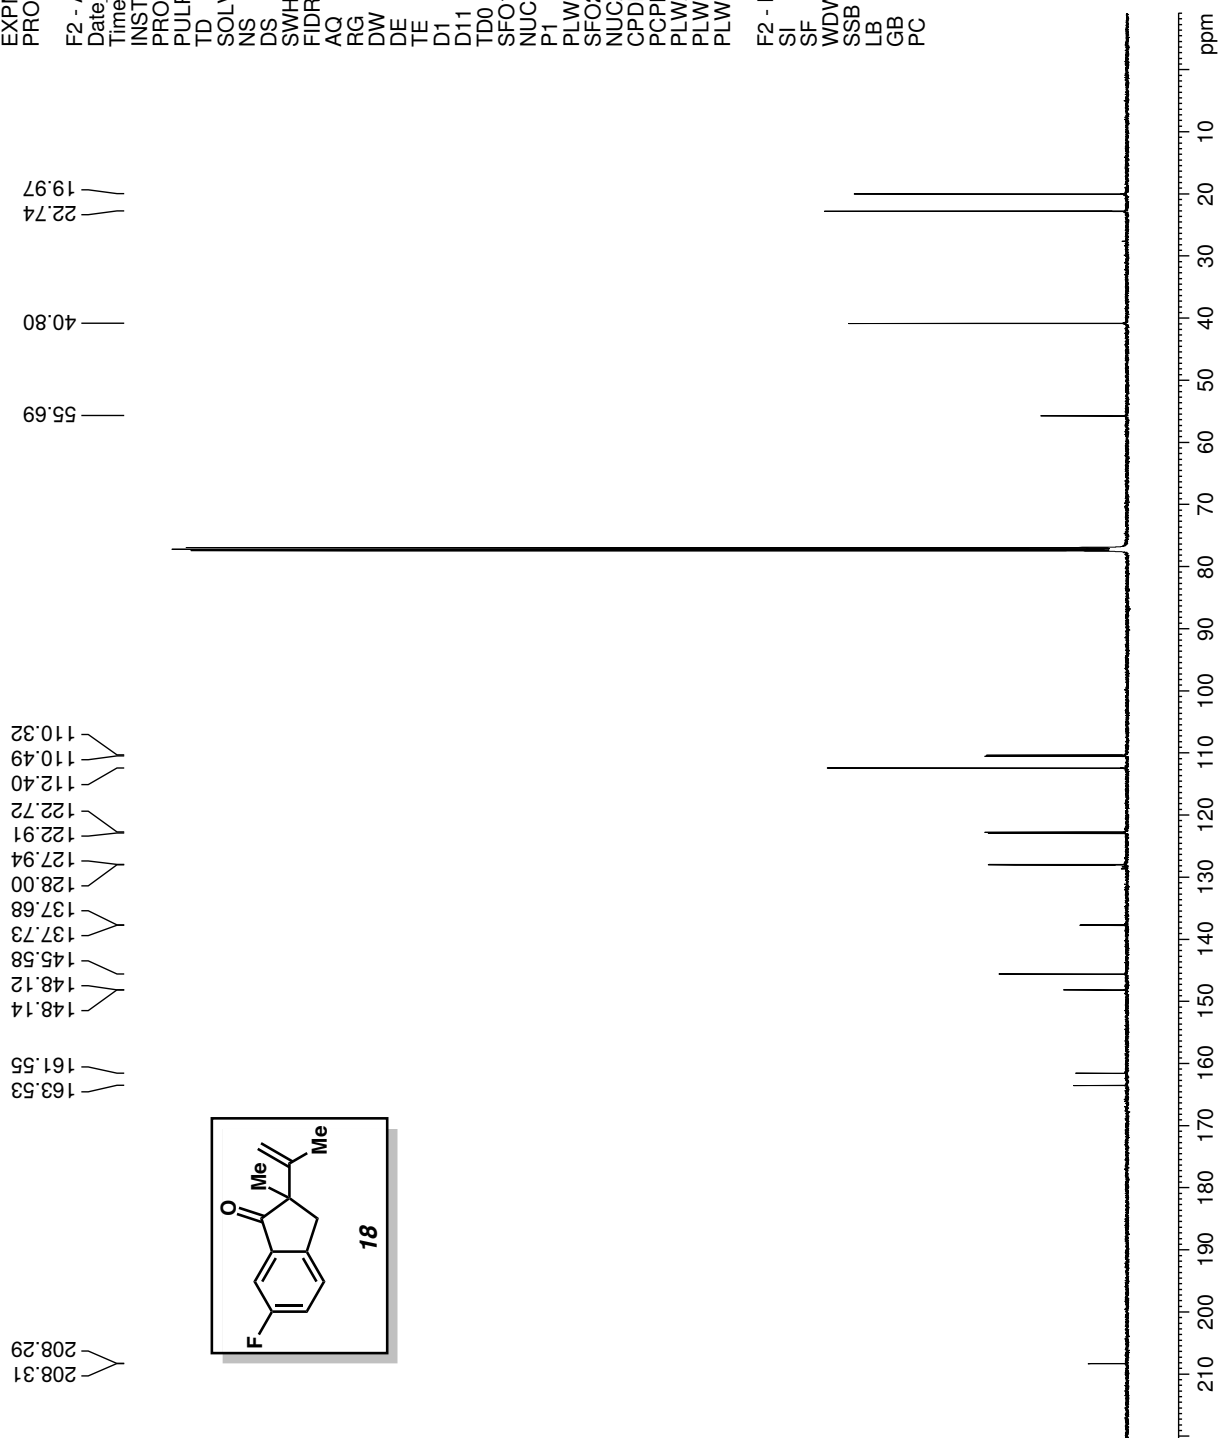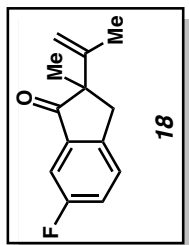



Current Data Parameters  
 NAME JM-5-057  
 EXPNO 101  
 PROCNO 1

F2 - Acquisition Parameters  
 Date\_ 20170206  
 Time\_ 20.04 h  
 INSTRUM av500  
 PROBHD Z119248\_0002 (  
 PULPROG zgpg30  
 TD 65536  
 SOLVENT CDCl3  
 NS 730  
 DS 2  
 SWH 31250.000 Hz  
 FIDRES 0.953674 Hz  
 AQ 1.0485760 sec  
 RG 204.54  
 DW 16.000 usec  
 DE 18.00 usec  
 TE 298.0 K  
 D1 2.00000000 sec  
 D11 0.03000000 sec  
 TD0 1  
 SFO1 125.7722511 MHz  
 NUC1 13C  
 P1 10.50 usec  
 PLW1 23.00000000 W  
 SFO2 500.1330008 MHz  
 NUC2 1H  
 CPDPRG2 waltz16  
 PCPD2 80.00 usec  
 PLW2 13.50000000 W  
 PLW12 0.21094000 W  
 PLW13 0.10610000 W

F2 - Processing parameters  
 SI 131072  
 SF 125.7577716 MHz  
 WDW EM  
 SSB 0  
 LB 1.00 Hz  
 GB 0  
 PC 1.40

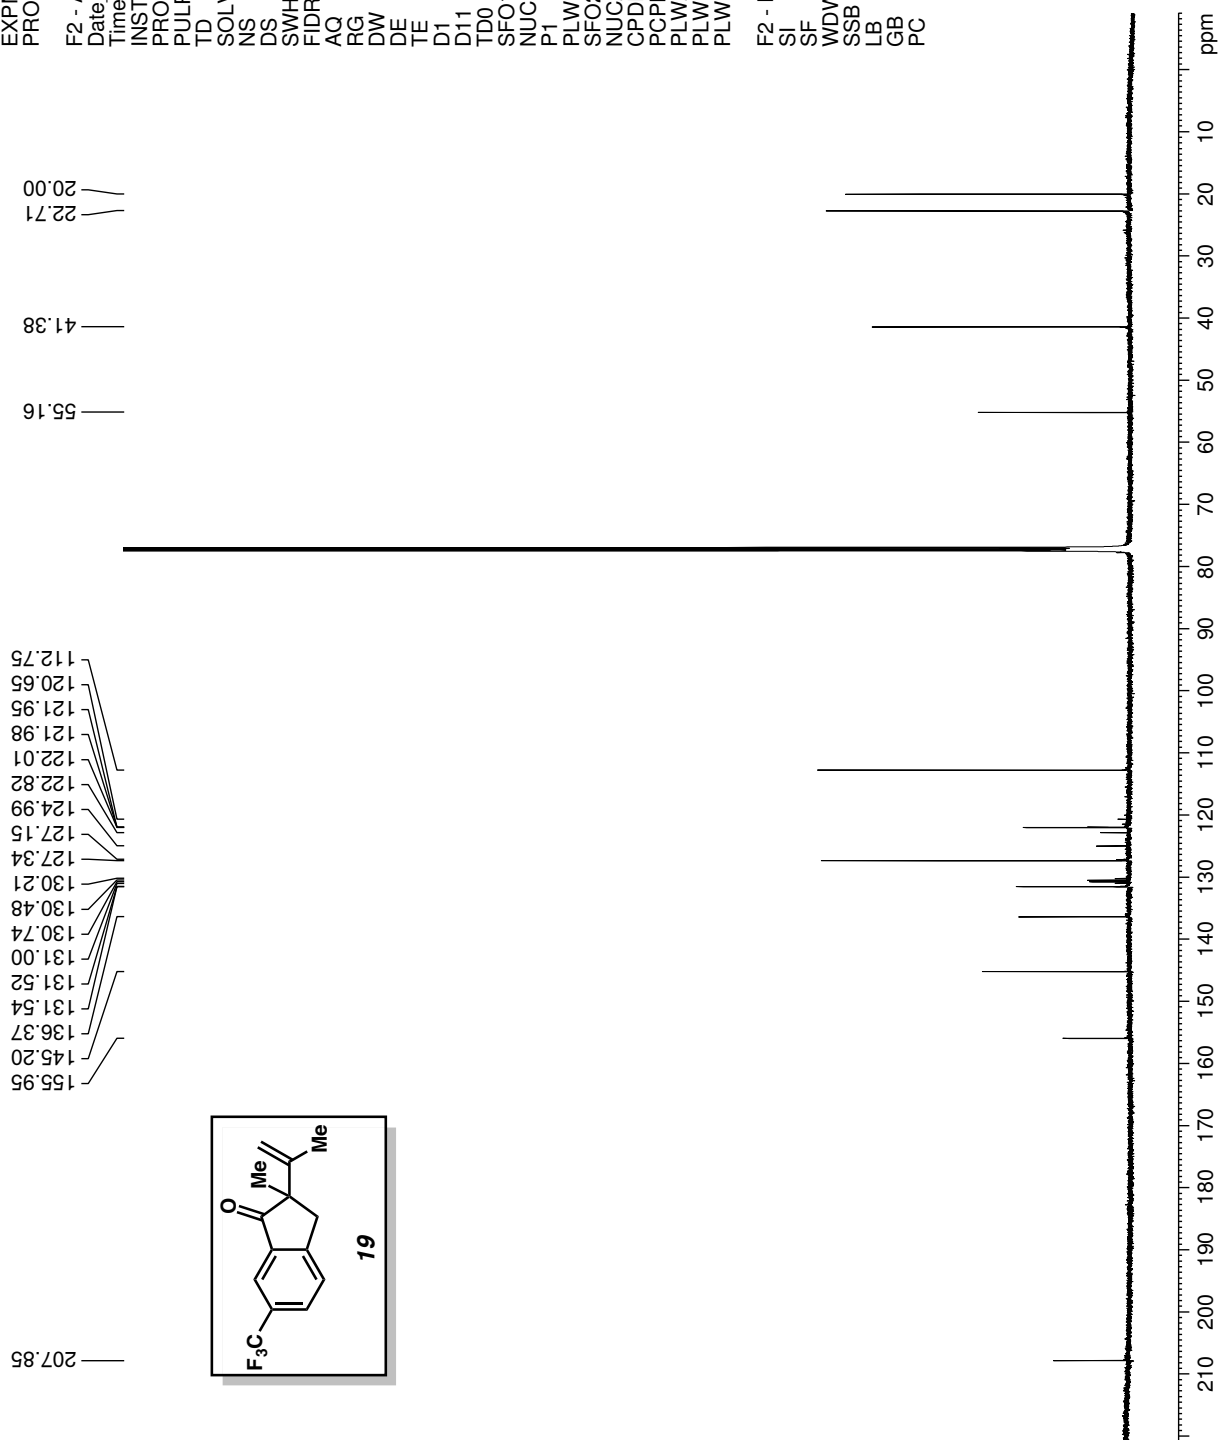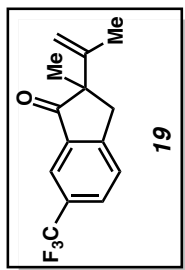

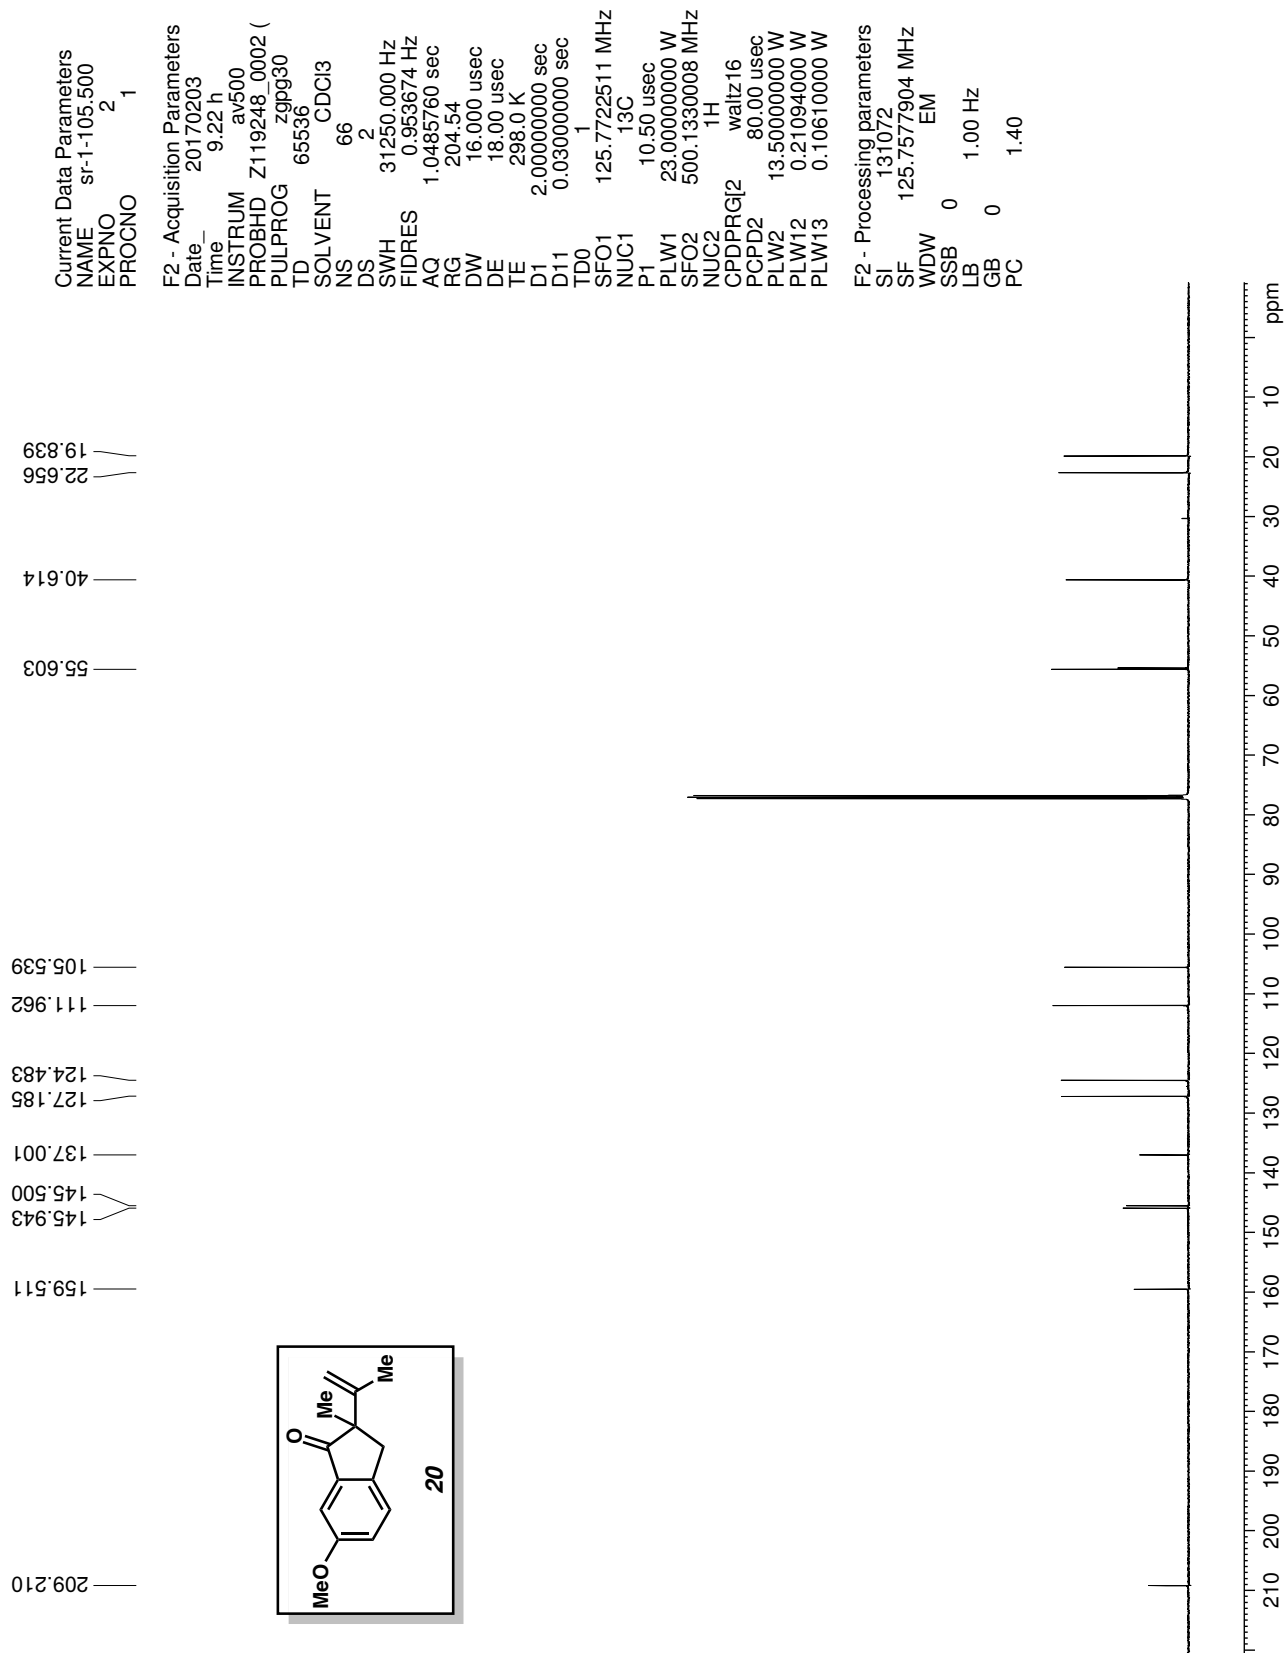

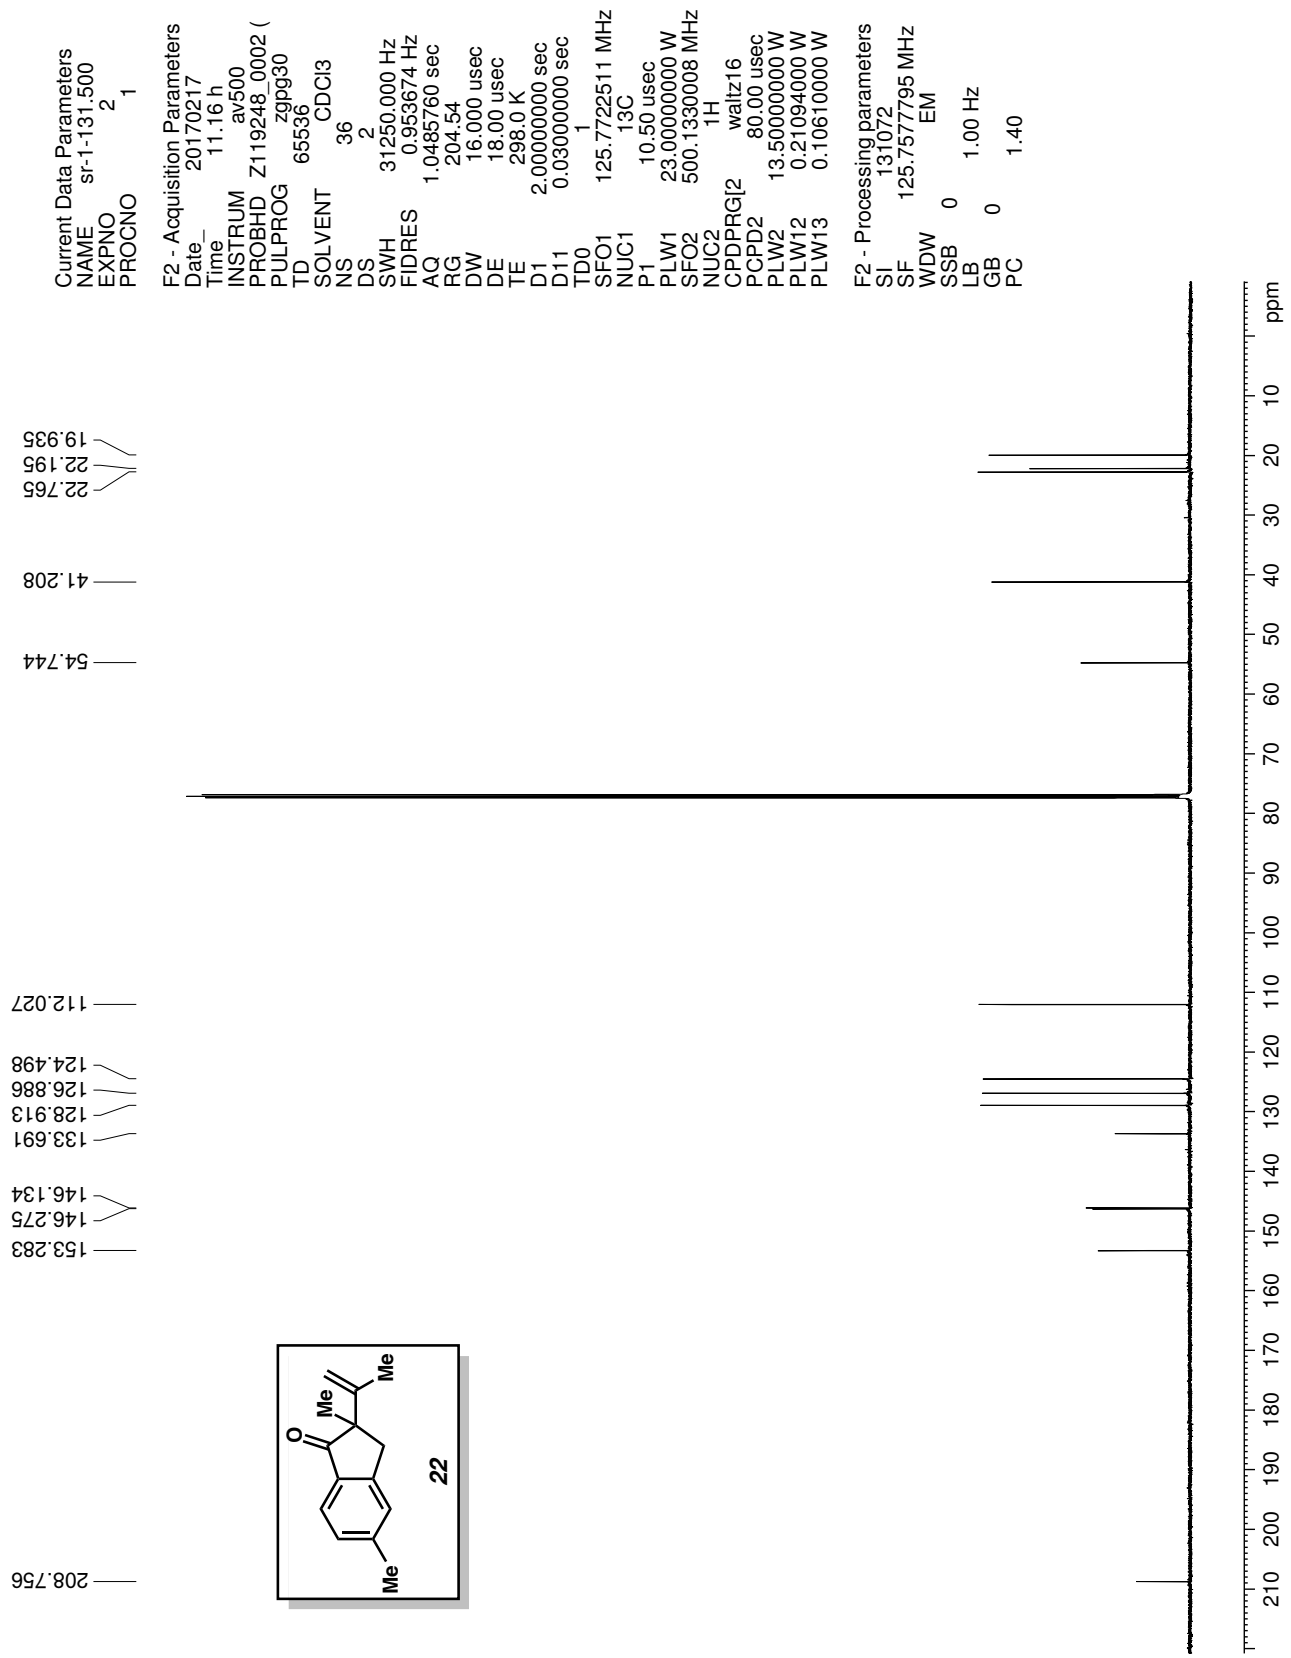

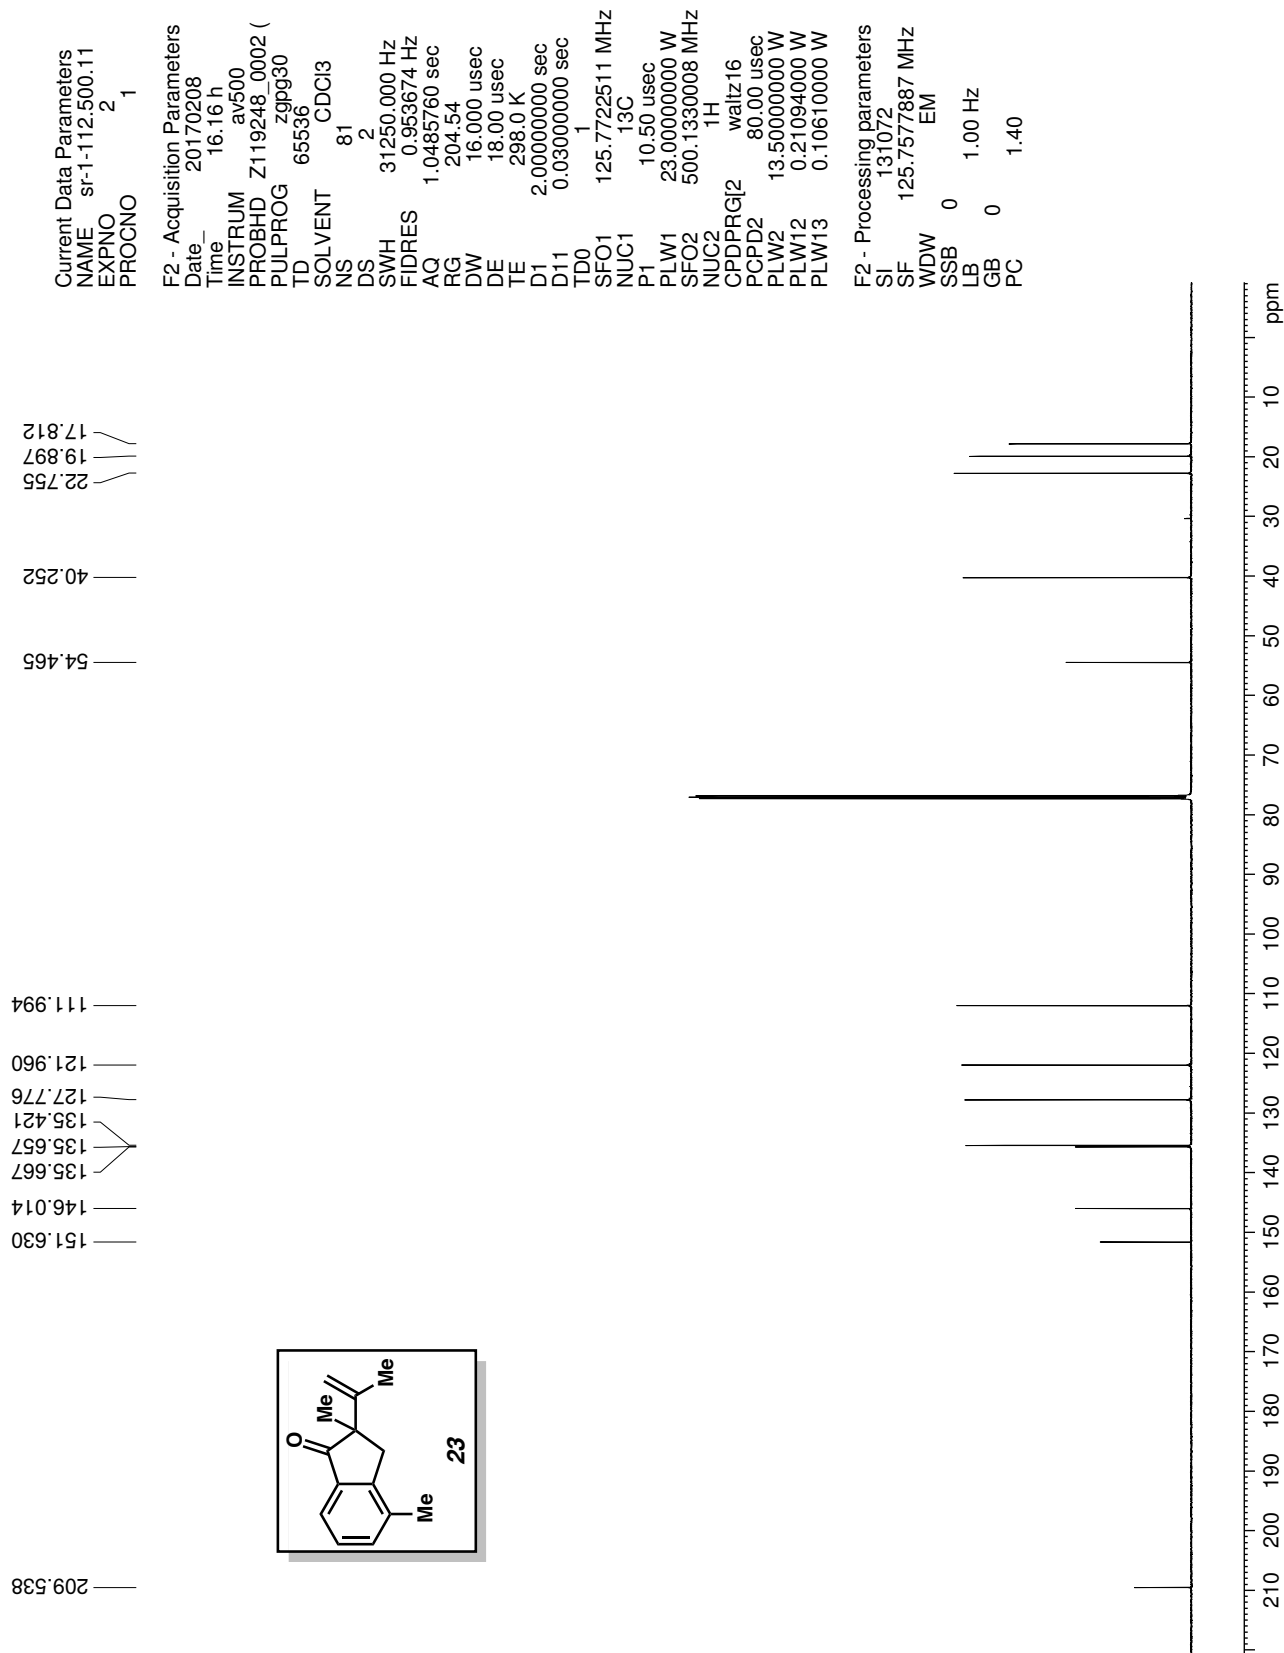

Current Data Parameters  
 NAME JMM-7-244-char  
 EXPNO 2  
 PROCNO 999

F2 - Acquisition Parameters  
 Date\_ 20170215  
 Time\_ 16.37  
 INSTRUM av500  
 PROBHD 5 mm DCH 13C-1  
 PULPROG zgpg30  
 TD 65536  
 SOLVENT CDCl3  
 NS 166  
 DS 2  
 SWH 50000.000 Hz  
 FIDRES 0.762939 Hz  
 AQ 0.6553600 sec  
 RG 204.54  
 DW 10.000 usec  
 DE 100.00 usec  
 TE 298.0 K  
 D1 2.00000000 sec  
 D11 0.03000000 sec  
 TD0 1

==== CHANNEL f1 =====  
 SFO1 125.7766527 MHz  
 NUC1 13C  
 P1 9.63 usec  
 PLW1 23.00000000 W

==== CHANNEL f2 =====  
 SFO2 500.1330008 MHz  
 NUC2 1H  
 CPDPRG2 waltz16  
 PCPD2 80.00 usec  
 PLW2 13.50000000 W  
 PLW12 0.21094000 W  
 PLW13 0.13500001 W

F2 - Processing parameters  
 SI 131072  
 SF 125.7577734 MHz  
 WDW EM  
 SSB 0  
 LB 1.00 Hz  
 GB 0  
 PC 1.40

13.34  
 13.55  
 15.99  
 18.25  
 20.23  
 20.30  
 35.26  
 42.66  
 52.11  
 52.26

118.34  
 120.32  
 125.76  
 127.56  
 127.83  
 129.41  
 129.81  
 130.87  
 131.06  
 131.63  
 131.72  
 138.90  
 139.27  
 145.12  
 146.85  
 169.05  
 169.40

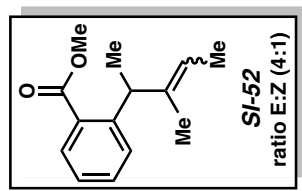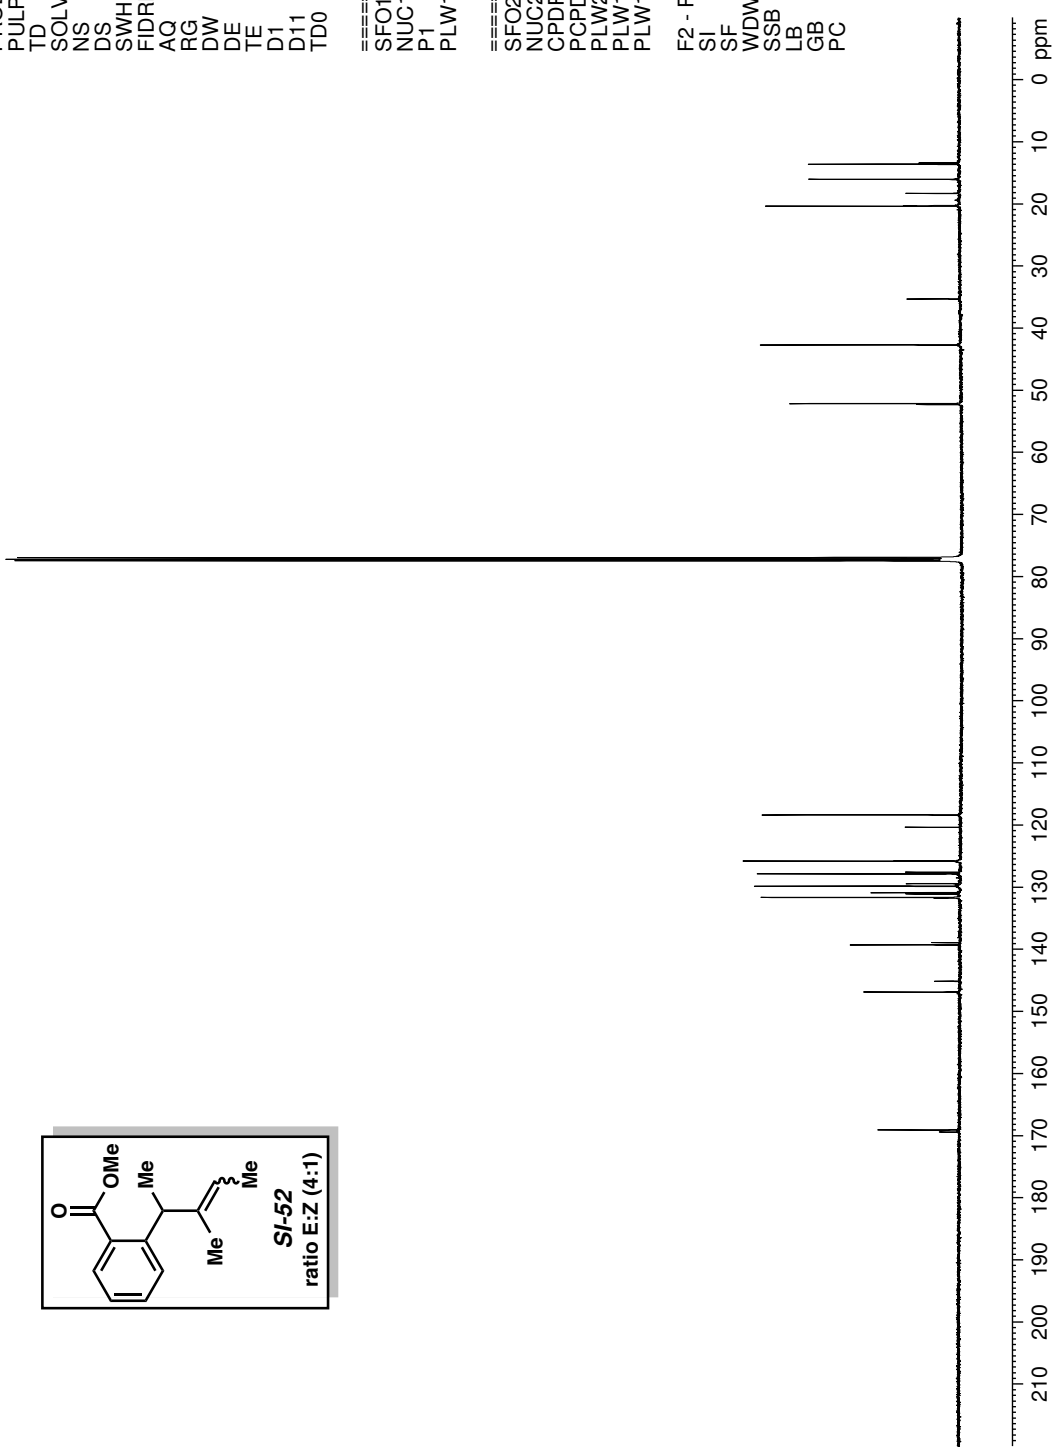

Current Data Parameters  
 NAME JMM-7-247--char  
 EXPNO 2  
 PROCNO 999

F2 - Acquisition Parameters  
 Date\_ 20170215  
 Time\_ 16.16  
 INSTRUM av500  
 PROBHD 5 mm DCH 13C-1  
 PULPROG zgpg30  
 TD 65536  
 SOLVENT CDCl3  
 NS 118  
 DS 2  
 SWH 50000.000 Hz  
 FIDRES 0.762939 Hz  
 AQ 0.6553600 sec  
 RG 204.54  
 DW 10.000 usec  
 DE 18.00 usec  
 TE 298.0 K  
 D1 2.00000000 sec  
 D11 0.03000000 sec  
 TD0 1

==== CHANNEL f1 =====  
 SFO1 125.7766527 MHz  
 NUC1 13C  
 P1 9.63 usec  
 PLW1 23.00000000 W

==== CHANNEL f2 =====  
 SFO2 500.1330008 MHz  
 NUC2 1H  
 CPDPRG2 waltz16  
 PCPD2 80.00 usec  
 PLW2 13.50000000 W  
 PLW12 0.21094000 W  
 PLW13 0.13500001 W

F2 - Processing parameters  
 SI 131072  
 SF 125.757725 MHz  
 WDW EM  
 SSB 0  
 LB 1.00 Hz  
 GB 0  
 PC 1.40

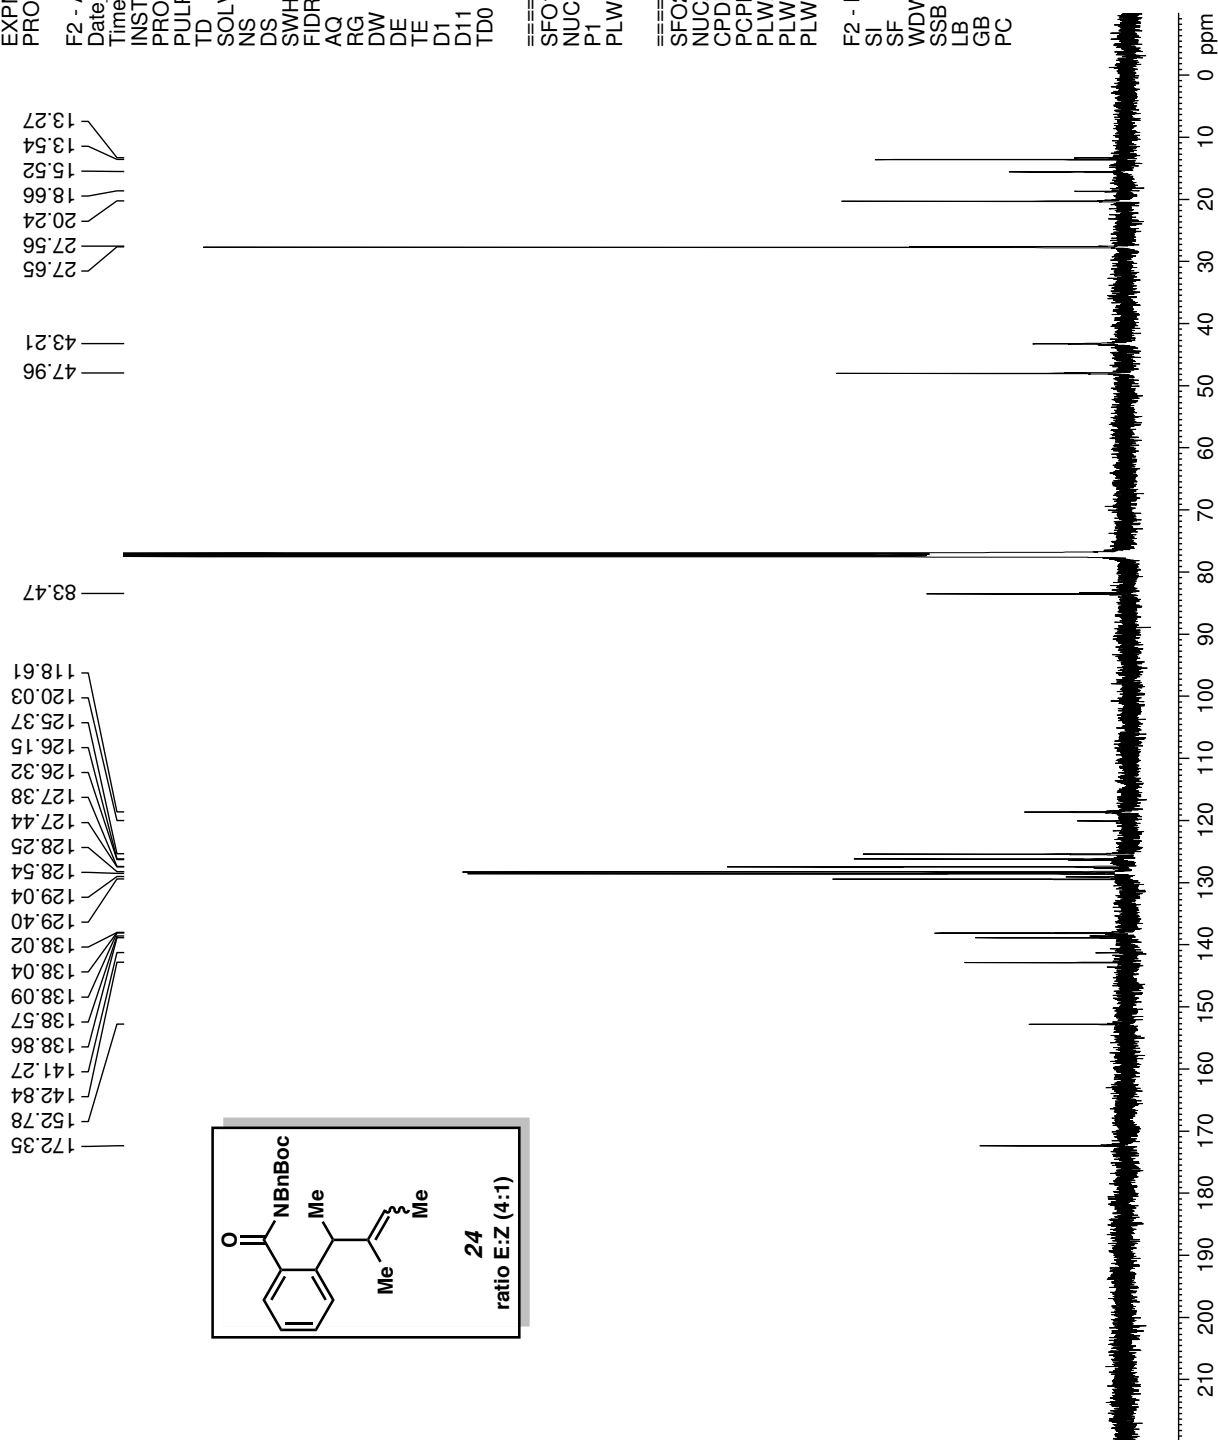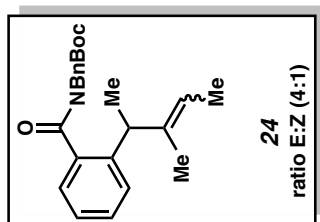

Current Data Parameters  
 NAME JMM-7-249-char  
 EXPNO 2  
 PROCNO 999

F2 - Acquisition Parameters  
 Date\_ 20170207  
 Time 20.08  
 INSTRUM av500  
 PROBHD 5 mm DCH 13C-1  
 PULPROG zgpg30  
 TD 65536  
 SOLVENT CDCl3  
 NS 147  
 DS 2  
 SWH 50000.000 Hz  
 FIDRES 0.762939 Hz  
 AQ 0.6553600 sec  
 RG 204.54  
 DW 10.000 usec  
 DE 100.00 usec  
 TE 298.0 K  
 D1 2.00000000 sec  
 D11 0.03000000 sec  
 TD0 1

==== CHANNEL f1 =====  
 SFO1 125.7766527 MHz  
 NUC1 13C  
 P1 9.63 usec  
 PLW1 23.00000000 W

==== CHANNEL f2 =====  
 SFO2 500.1330008 MHz  
 NUC2 1H  
 CPDPRG[2] waltz16  
 PCPD2 80.00 usec  
 PLW2 13.50000000 W  
 PLW12 0.21094000 W  
 PLW13 0.13500001 W

F2 - Processing parameters  
 SI 131072  
 SF 125.757729 MHz  
 WDW EM  
 SSB 0  
 LB 0  
 GB 0  
 PC 1.40

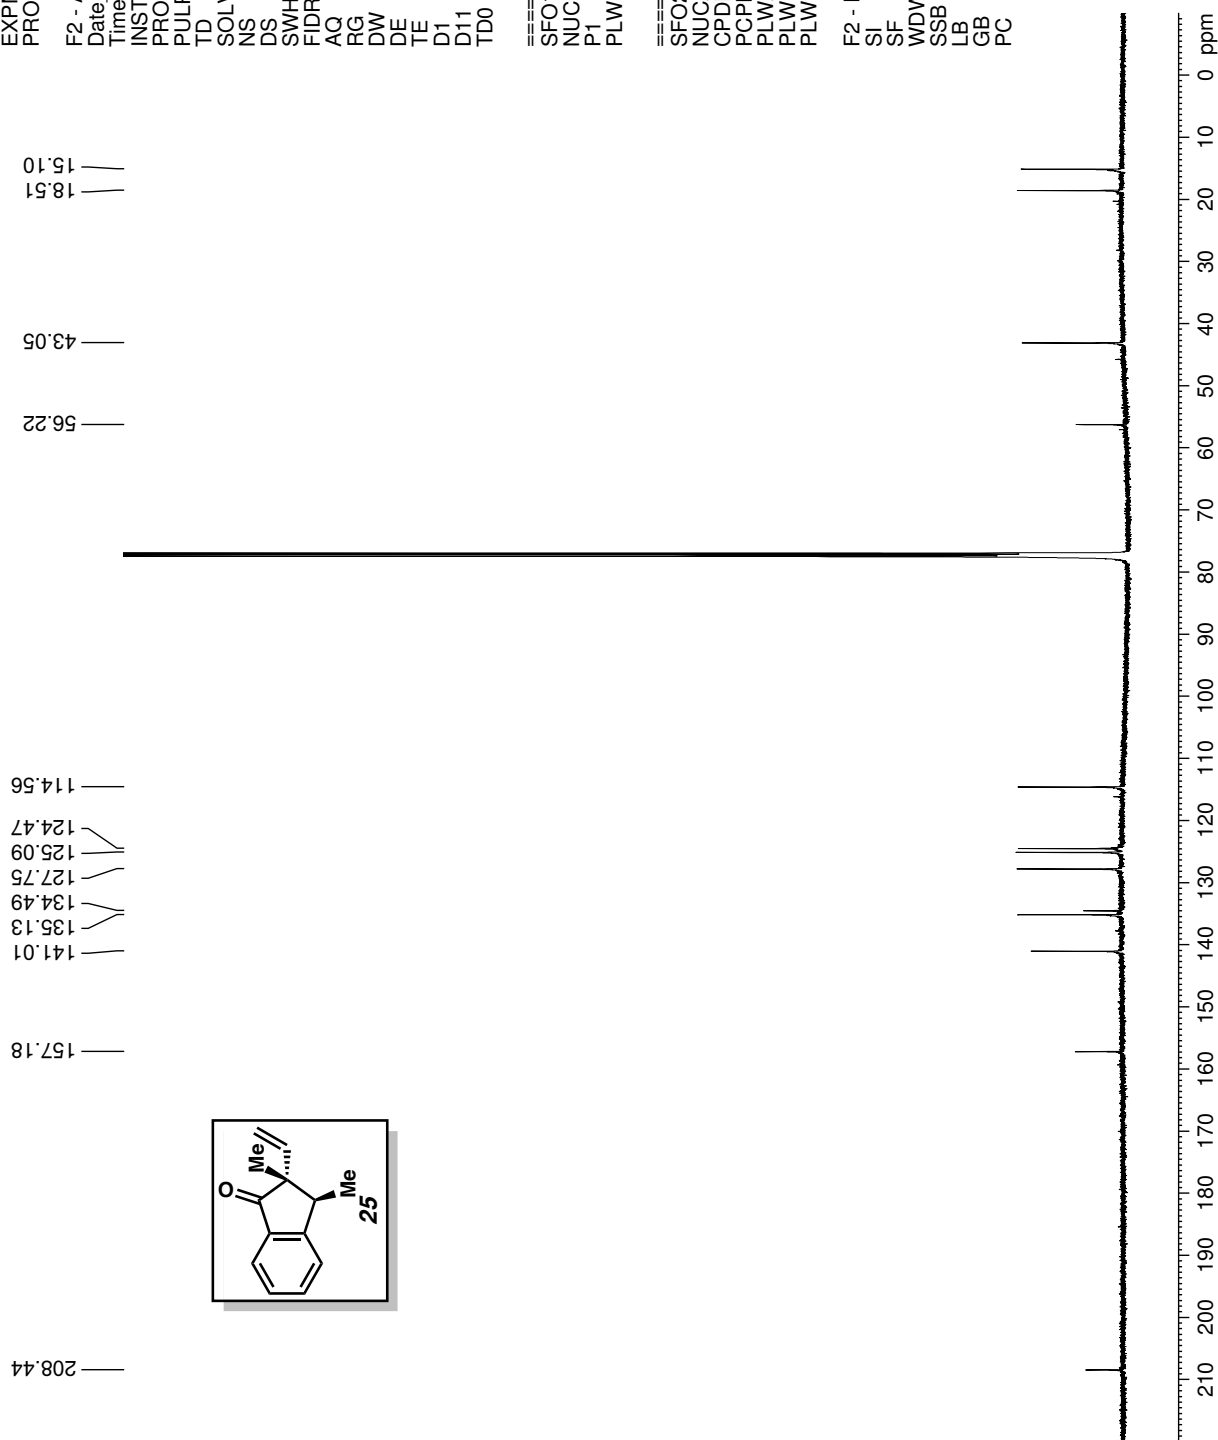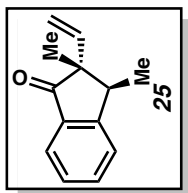

**$^{19}\text{F}$  NMR Spectra:**



Current Data Parameters  
 NAME JM-5-054  
 EXPNO 130  
 PROCNO 1

F2 - Acquisition Parameters  
 Date\_ 20170313  
 Time\_ 13.33  
 INSTRUM av400  
 PROBHD 5 mm PABBO BB/  
 PULPROG zgpg30  
 TD 262144  
 SOLVENT CDCI3  
 NS 48  
 DS 0  
 SWH 150000.000 Hz  
 FIDRES 0.572205 Hz  
 AQ 0.8738133 sec  
 RG 189.85  
 DW 3.333 usec  
 DE 6.50 usec  
 TE 299.0 K  
 D1 1.00000000 sec  
 D11 0.03000000 sec  
 D12 0.00002000 sec  
 TD0 1

==== CHANNEL f1 =====  
 SFO1 376.4983660 MHz  
 NU1 19F  
 P1 14.50 usec  
 PLW1 17.00000000 W

==== CHANNEL f2 =====  
 SFO2 400.1324008 MHz  
 NU2 1H  
 CPDPRG2 waltz16  
 PCPD2 90.00 usec  
 PLW2 13.00000000 W  
 PLW12 0.36111000 W

F2 - Processing parameters  
 SI 262144  
 SF 376.4983660 MHz  
 WDW EM  
 SSB 0  
 LB 1.00 Hz  
 GB 0  
 PC 1.00

-113.66

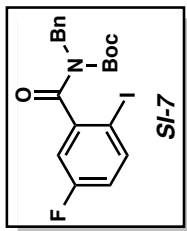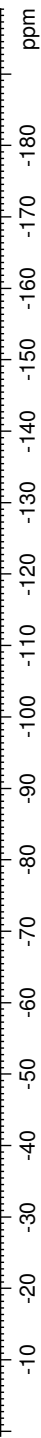

Current Data Parameters  
 NAME JM-5-067  
 EXPNO 140  
 PROCNO 1

F2 - Acquisition Parameters  
 Date\_ 20170313  
 Time\_ 13.39  
 INSTRUM av400  
 PROBHD 5 mm PABBO BB/  
 PULPROG zgpg30  
 TD 262144  
 SOLVENT CDCl3  
 NS 48  
 DS 0  
 SWH 150000.000 Hz  
 FIDRES 0.572205 Hz  
 AQ 0.8738133 sec  
 RG 189.85  
 DW 3.333 usec  
 DE 6.50 usec  
 TE 299.0 K  
 D1 1.00000000 sec  
 D11 0.03000000 sec  
 D12 0.00002000 sec  
 TD0 1

==== CHANNEL f1 =====  
 SFO1 376.4983660 MHz  
 NU1 19F  
 P1 14.50 usec  
 PLW1 17.00000000 W

==== CHANNEL f2 =====  
 SFO2 400.1324008 MHz  
 NU2 1H  
 CPDPRG2 waltz16  
 PCPD2 90.00 usec  
 PLW2 13.00000000 W  
 PLW12 0.36111000 W

F2 - Processing parameters  
 SI 262144  
 SF 376.4983660 MHz  
 WDW EM  
 SSB 0  
 LB 1.00 Hz  
 GB 0  
 PC 1.00

— -117.88

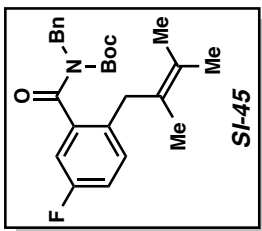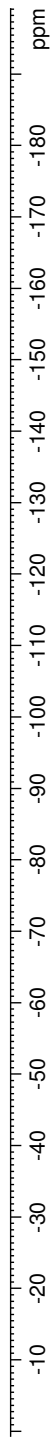

Current Data Parameters  
 NAME JM-5-067  
 EXPNO 150  
 PROCNO 1

F2 - Acquisition Parameters  
 Date\_ 20170313  
 Time\_ 13.45  
 INSTRUM av400  
 PROBHD 5 mm PABBO BB/  
 PULPROG zgpg30  
 TD 262144  
 SOLVENT CDCl3  
 NS 48  
 DS 0  
 SWH 150000.000 Hz  
 FIDRES 0.572205 Hz  
 AQ 0.8738133 sec  
 RG 189.85  
 DW 3.333 usec  
 DE 6.50 usec  
 TE 299.0 K  
 D1 1.00000000 sec  
 D11 0.03000000 sec  
 D12 0.00002000 sec  
 TD0 1

==== CHANNEL f1 =====  
 SFO1 376.4983660 MHz  
 NU1 19F  
 P1 14.50 usec  
 PLW1 17.00000000 W

==== CHANNEL f2 =====  
 SFO2 400.1324008 MHz  
 NU2 1H  
 CPDPRG2 waltz16  
 PCPD2 90.00 usec  
 PLW2 13.00000000 W  
 PLW12 0.36111000 W

F2 - Processing parameters  
 SI 262144  
 SF 376.4983660 MHz  
 WDW EM  
 SSB 0  
 LB 1.00 Hz  
 GB 0  
 PC 1.00

— -114.29

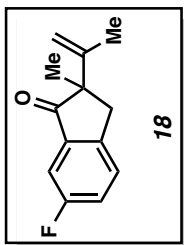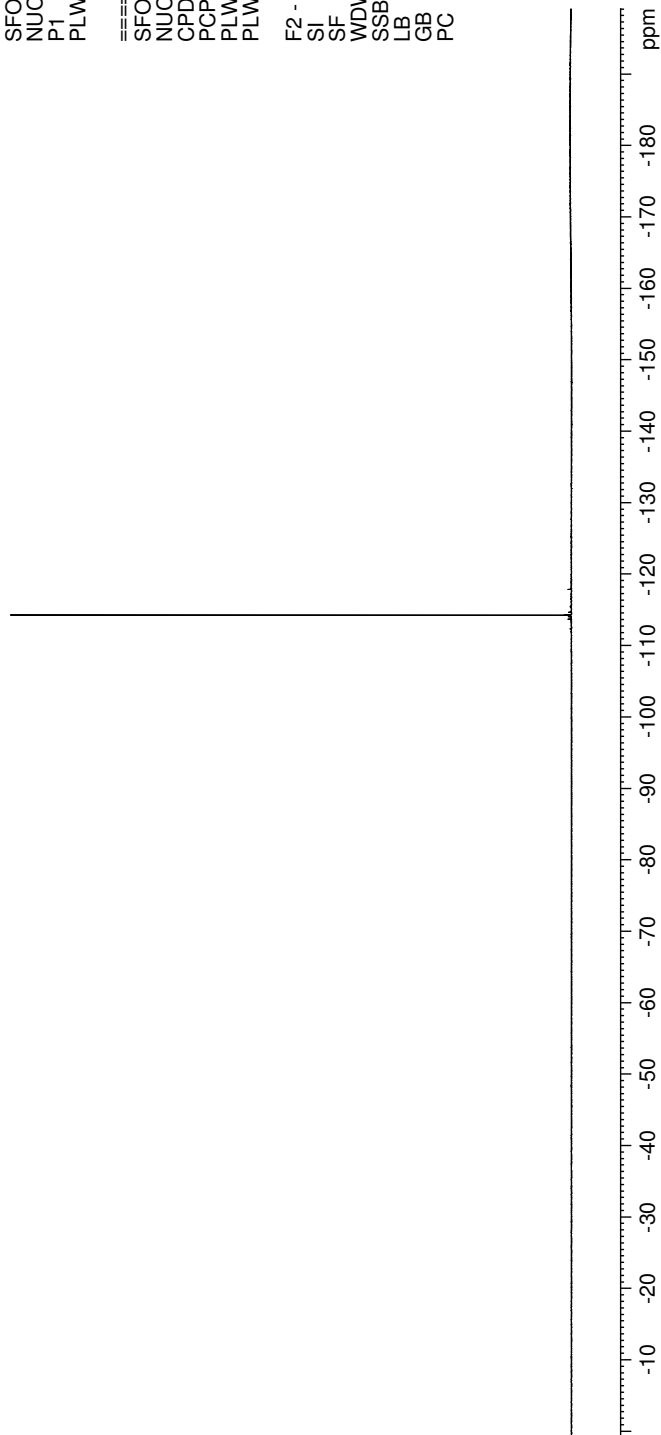

```

Current Data Parameters
NAME      JM-5-037
EXPNO    160
PROCNO    1

F2 - Acquisition Parameters
Date_     20170313
Time      13.51
INSTRUM   av400
PROBHD    5 mm PABBO BB/
PULPROG   zgpg30
TD         262144
SOLVENT    CDCl3
NS         48
DS         0
SMW        150000.000 Hz
FIDRES     0.572205 Hz
AQ         0.8738133 sec
RG         189.85
DW         3.333 usec
DE         6.50 usec
TE         299.0 K
D1         1.00000000 sec
D11        0.03000000 sec
D12        0.00002000 sec
TD0        1

===== CHANNEL f1 =====
SFO1      376.4983660 MHz
NUC1       19F
P1         14.50 usec
PLW1      17.00000000 W

===== CHANNEL f2 =====
SFO2      400.1324008 MHz
NUC2       1H
CPDPRG2    waltz16
PCPD2      90.00 usec
PLW2       13.00000000 W
PLW12      0.36111000 W

F2 - Processing parameters
SI         262144
SF         376.4983660 MHz
WDW        EM
SSB        0
LB         1.00 Hz
GB         0
PC         1.00
    
```

-63.04

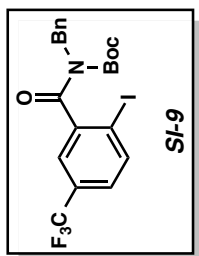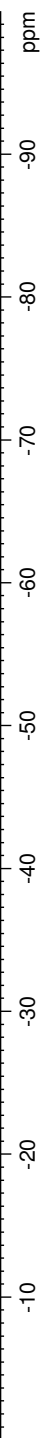

Current Data Parameters  
 NAME JM-5-055  
 EXPNO 170  
 PROCNO 1

F2 - Acquisition Parameters  
 Date\_ 20170313  
 Time\_ 13.57  
 INSTRUM av400  
 PROBHD 5 mm PABBO BB/  
 PULPROG zgpg30  
 TD 262144  
 SOLVENT CDCl3  
 NS 48  
 DS 0  
 SWH 150000.000 Hz  
 FIDRES 0.572205 Hz  
 AQ 0.8738133 sec  
 RG 189.85  
 DW 3.333 usec  
 DE 6.50 usec  
 TE 299.0 K  
 D1 1.00000000 sec  
 D11 0.03000000 sec  
 D12 0.00002000 sec  
 TD0 1

==== CHANNEL f1 =====  
 SFO1 376.4983660 MHz  
 NU1 19F  
 P1 14.50 usec  
 PLW1 17.00000000 W

==== CHANNEL f2 =====  
 SFO2 400.1324008 MHz  
 NU2 1H  
 CPDPRG2 waltz16  
 PCPD2 90.00 usec  
 PLW2 13.00000000 W  
 PLWT2 0.36111000 W

F2 - Processing parameters  
 SI 262144  
 SF 376.4983660 MHz  
 WDW EM  
 SSB 0  
 LB 0  
 GB 0  
 PC 1.00

— -62.42

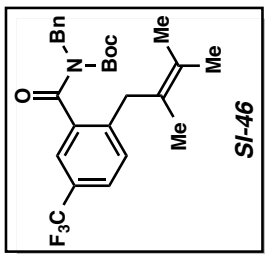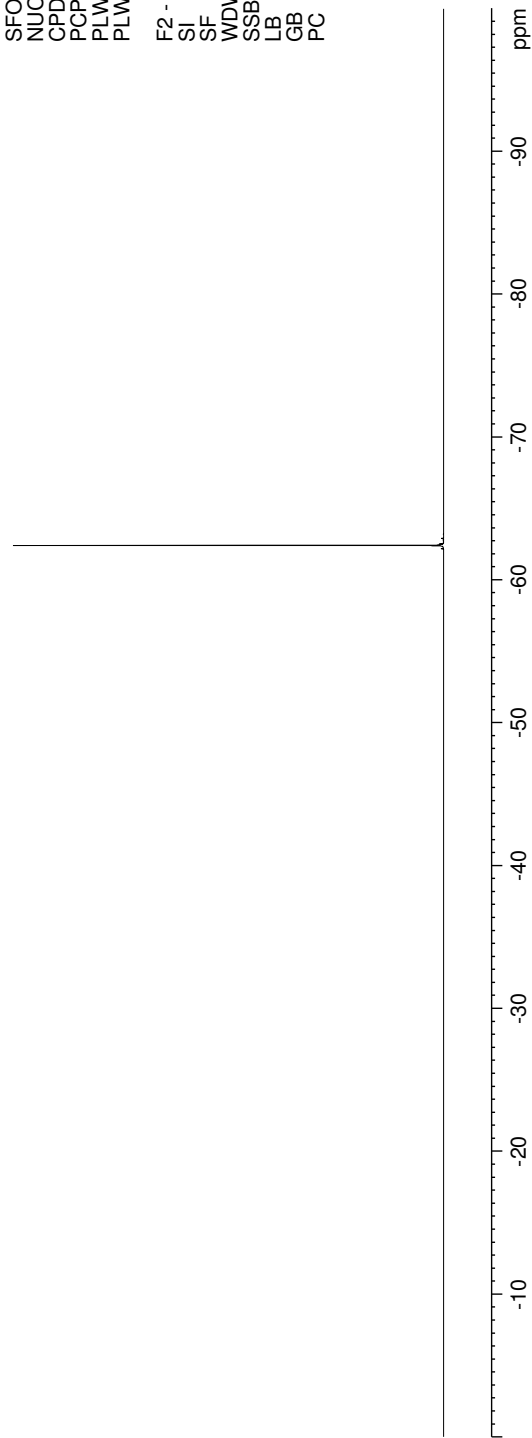

Current Data Parameters  
 NAME JM-5-057  
 EXPNO 180  
 PROCNO 1

F2 - Acquisition Parameters  
 Date\_ 20170313  
 Time\_ 14.03  
 INSTRUM av400  
 PROBHD 5 mm PABBO BB/  
 PULPROG zgpg30  
 TD 262144  
 SOLVENT CDCl3  
 NS 48  
 DS 0  
 SWH 150000.000 Hz  
 FIDRES 0.572205 Hz  
 AQ 0.8738133 sec  
 RG 189.85  
 DW 3.333 usec  
 DE 6.50 usec  
 TE 299.0 K  
 D1 1.00000000 sec  
 D11 0.03000000 sec  
 D12 0.00002000 sec  
 TD0 1

==== CHANNEL f1 =====  
 SFO1 376.4983660 MHz  
 NU1 19F  
 P1 14.50 usec  
 PLW1 17.00000000 W

==== CHANNEL f2 =====  
 SFO2 400.1324008 MHz  
 NU2 1H  
 CPDPRG2 waltz16  
 PCPD2 90.00 usec  
 PLW2 13.00000000 W  
 PLWT2 0.36111000 W

F2 - Processing parameters  
 SI 262144  
 SF 376.4983660 MHz  
 WDW EM  
 SSB 0  
 LB 1.00 Hz  
 GB 0  
 PC 1.00

— -62.45

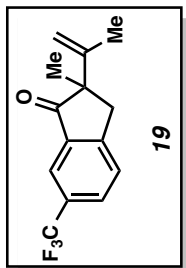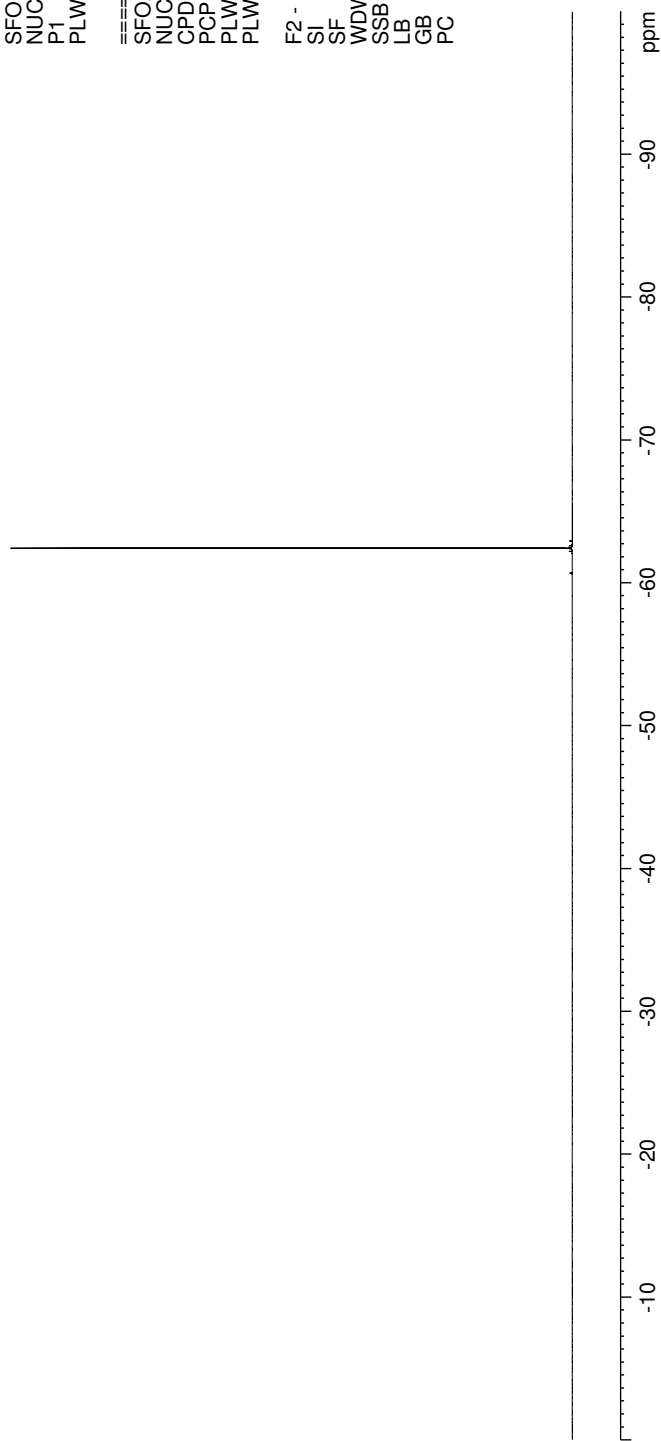

Supplement: NIHMS915243-supplement-Supporting_Information.pdf [file NIHMS915243-supplement-Supporting_Information.pdf]
